# Supplementary material for: Gene Expression Profiling of Lymph Node Sub-Capsular Sinus Macrophages in Cancer
Source: Front Immunol. 2021 Jun 8;12:672123. doi: 10.3389/fimmu.2021.672123 (PMC8218730; doi:10.3389/fimmu.2021.672123)
Supplement: Supplementary file 1 [file Table_1.xls]

## Sheet: 1
fileName	pool	TD_ND	phenotype	label
RNA191014FP_ND1_minus_S5_L003_R1_001-ReadsPerGene.out.annotation.tab	1	0	0	RNA191014FP_ND1_minus_S5_L003_R1_001
RNA191014FP_ND1_plus_S6_L003_R1_001-ReadsPerGene.out.annotation.tab	1	0	1	RNA191014FP_ND1_plus_S6_L003_R1_001
RNA191014FP_TD_minus_S1_L003_R1_001-ReadsPerGene.out.annotation.tab	1	1	0	RNA191014FP_TD_minus_S1_L003_R1_001
RNA191014FP_TD1_plus_S2_L003_R1_001-ReadsPerGene.out.annotation.tab	1	1	1	RNA191014FP_TD1_plus_S2_L003_R1_001
RNA191014FP_ND1_minus_S5_L004_R1_001-ReadsPerGene.out.annotation.tab	2	0	0	RNA191014FP_ND1_minus_S5_L004_R1_001
RNA191014FP_ND1_plus_S6_L004_R1_001-ReadsPerGene.out.annotation.tab	2	0	1	RNA191014FP_ND1_plus_S6_L004_R1_001
RNA191014FP_TD_minus_S1_L004_R1_001-ReadsPerGene.out.annotation.tab	2	1	0	RNA191014FP_TD_minus_S1_L004_R1_001
RNA191014FP_TD1_plus_S2_L004_R1_001-ReadsPerGene.out.annotation.tab	2	1	1	RNA191014FP_TD1_plus_S2_L004_R1_001
RNA191014FP_ND2_minus_S7_L003_R1_001-ReadsPerGene.out.annotation.tab	3	0	0	RNA191014FP_ND2_minus_S7_L003_R1_001
RNA191014FP_ND2_plus_S8_L003_R1_001-ReadsPerGene.out.annotation.tab	3	0	1	RNA191014FP_ND2_plus_S8_L003_R1_001
RNA191014FP_TD2_minus_S3_L003_R1_001-ReadsPerGene.out.annotation.tab	3	1	0	RNA191014FP_TD2_minus_S3_L003_R1_001
RNA191014FP_TD2_plus_S4_L003_R1_001-ReadsPerGene.out.annotation.tab	3	1	1	RNA191014FP_TD2_plus_S4_L003_R1_001
RNA191014FP_ND2_minus_S7_L004_R1_001-ReadsPerGene.out.annotation.tab	4	0	0	RNA191014FP_ND2_minus_S7_L004_R1_001
RNA191014FP_ND2_plus_S8_L004_R1_001-ReadsPerGene.out.annotation.tab	4	0	1	RNA191014FP_ND2_plus_S8_L004_R1_001
RNA191014FP_TD2_minus_S3_L004_R1_001-ReadsPerGene.out.annotation.tab	4	1	0	RNA191014FP_TD2_minus_S3_L004_R1_001
RNA191014FP_TD2_plus_S4_L004_R1_001-ReadsPerGene.out.annotation.tab	4	1	1	RNA191014FP_TD2_plus_S4_L004_R1_001

## Sheet: 2
	baseMean	log2FoldChange	lfcSE	stat	pvalue	padj
ENSMUSG00000098104_Gm6085	17.7726	-0.817458	0.291815	7.79862	0.00522861	0.0121372
ENSMUSG00000103922_Gm6123	2.20414	1.58647	1.17338	1.08179	0.298298	0.413738
ENSMUSG00000033845_Mrpl15	1060.84	0.506859	0.0599199	71.3009	3.0669884349835e-17	2.65514757603111e-16
ENSMUSG00000102275_Gm37144	0.968497	-2.3521	1.55065	2.60434	0.106571	NA
ENSMUSG00000025903_Lypla1	2096.04	0.000845169	0.0898854	8.74651754543265e-05	0.992538	1
ENSMUSG00000033813_Tcea1	927.194	0.218117	0.0640302	11.5788	0.000667077	0.00182655
ENSMUSG00000102653_Gm37079	1.50171	-1.1653	2.29604	0.257896	0.61157	0.718257
ENSMUSG00000033793_Atp6v1h	3593.36	0.162516	0.0707694	5.25371	0.0219	0.0440506
ENSMUSG00000025907_Rb1cc1	1211.16	-0.766612	0.114356	44.2658	2.86675220140436e-11	1.68859985999746e-10
ENSMUSG00000090031_4732440D04Rik	30.3353	-0.345566	0.28485	1.44655	0.229082	0.334844
ENSMUSG00000103845_Gm19026	0.810795	-1.70716	3.02037	0.421444	0.516218	NA
ENSMUSG00000033740_St18	7.62563	-1.97285	1.07372	1.27997	0.257904	0.368514
ENSMUSG00000102135_Gm37108	0.813735	1.2913	1.19717	1.34445	0.24625	NA
ENSMUSG00000051285_Pcmtd1	777.64	-0.481607	0.101305	22.3457	2.27719635090799e-06	8.58686257286118e-06
ENSMUSG00000103509_Gm38372	2.17954	-3.50234	1.65005	4.27376	0.0387053	0.0731477
ENSMUSG00000097797_Gm26901	2.44525	-1.59307	1.07467	1.96571	0.160904	0.25028
ENSMUSG00000103933_Gm36964	1.49047	0.417916	1.48176	0.0694218	0.792181	0.866058
ENSMUSG00000061024_Rrs1	829.42	0.13835	0.0726384	3.62156	0.0570355	0.102947
ENSMUSG00000025911_Adhfe1	4.89074	-0.120292	0.705525	0.0269048	0.86971	0.924192
ENSMUSG00000079671_2610203C22Rik	6.13413	-1.48434	0.898003	1.76604	0.183872	0.279395
ENSMUSG00000025912_Mybl1	3.8447	2.78138	0.907176	9.78845	0.00175612	0.00448091
ENSMUSG00000045210_Vcpip1	1248.31	-0.417114	0.0905193	21.053	4.46750793833285e-06	1.63569674601768e-05
ENSMUSG00000097893_1700034P13Rik	3.59081	2.62401	1.22751	2.88981	0.0891414	0.151536
ENSMUSG00000025915_Sgk3	3915.87	0.499682	0.172571	8.02855	0.00460457	0.0108249
ENSMUSG00000046101_Mcmdc2	1.91223	-1.07918	1.45387	0.569411	0.450493	0.568403
ENSMUSG00000098234_Snhg6	125.822	0.769346	0.236984	10.1369	0.00145332	0.00375667
ENSMUSG00000093178_Snord87	2.10825	-1.05395	1.04961	0.875445	0.349452	0.468323
ENSMUSG00000099032_Tcf24	4.25429	0.172004	2.9068	0.000116435	0.991391	1
ENSMUSG00000025917_Cops5	1491.6	0.551824	0.0612457	80.6856	2.64639741744731e-19	2.52985033916272e-18
ENSMUSG00000056763_Cspp1	284.411	0.267442	0.136309	3.78999	0.0515601	0.0942449
ENSMUSG00000067851_Arfgef1	1495.54	-0.0878445	0.0996669	0.771523	0.379746	0.498944
ENSMUSG00000102556_Gm37569	1.89779	-3.57649	2.94203	1.4315	0.23152	0.337815
ENSMUSG00000048960_Prex2	2.81839	-2.81656	2.7536	1.00654	0.315734	0.432739
ENSMUSG00000057715_A830018L16Rik	1.45628	2.46329	3.01005	0.722869	0.395204	0.514878
ENSMUSG00000103561_Gm38069	0.836961	-2.82638	2.0747	2.39764	0.121519	NA
ENSMUSG00000016918_Sulf1	20.0892	-2.66799	0.772377	9.41654	0.00215037	0.00541534
ENSMUSG00000025938_Slco5a1	261.335	1.04291	0.283981	12.0895	0.000507054	0.00141383
ENSMUSG00000005886_Ncoa2	1000.64	-0.613994	0.124738	23.8213	1.05708281215907e-06	4.13576367843496e-06
ENSMUSG00000103506_Gm38376	1.59669	-3.79227	1.97931	3.93566	0.0472726	0.0874505
ENSMUSG00000103085_Gm38120	3.69861	0.399678	1.16039	0.0908869	0.763053	0.842188
ENSMUSG00000102664_Gm38380	7.03567	0.416751	0.599307	0.441963	0.506177	0.621477
ENSMUSG00000025935_Tram1	5834	-0.274726	0.0578734	22.4546	2.15166593684709e-06	8.12990111806503e-06
ENSMUSG00000025937_Lactb2	372.102	-0.664682	0.109312	36.5943	1.45455064808759e-09	7.45836604384562e-09
ENSMUSG00000102982_Gm38319	2.57018	-0.603805	1.44983	0.073622	0.786134	0.860823
ENSMUSG00000097711_Gm5523	1.92838	-1.35312	1.14515	1.253	0.262981	0.374316
ENSMUSG00000025932_Eya1	129.895	-3.85924	0.315794	127.878	1.19387511596685e-29	1.83210603264504e-28
ENSMUSG00000025930_Msc	9.14657	-0.229604	0.878519	0.0604587	0.805772	0.876789
ENSMUSG00000082193_Rpl5-ps1	27.3615	0.57463	0.349261	2.5667	0.109135	0.179908
ENSMUSG00000025925_Terf1	305.335	-0.26134	0.0969598	7.24353	0.00711568	0.0160681
ENSMUSG00000104379_Gm37509	0.659083	-1.93272	3.03058	0.533503	0.465138	NA
ENSMUSG00000032719_Sbspon	1.37055	3.26272	2.3476	2.05047	0.15216	0.238818
ENSMUSG00000043716_Rpl7	6967.45	0.215035	0.132076	2.61567	0.105813	0.175351
ENSMUSG00000025921_Rdh10	137.131	-0.118928	0.184252	0.406146	0.523932	0.638006
ENSMUSG00000025920_Stau2	84.6761	2.07985	0.238427	71.9597	2.1963471095439e-17	1.91613040731124e-16
ENSMUSG00000025939_Ube2w	1272.55	0.630432	0.0965348	42.1517	8.44620087352295e-11	4.78959562552706e-10
ENSMUSG00000102457_Gm38342	6.28971	0.29809	0.595606	0.244006	0.621328	0.726778
ENSMUSG00000079658_Eloc	2460.51	0.30109	0.0533073	31.8211	1.69046838118701e-08	7.86246237860021e-08
ENSMUSG00000025940_Tmem70	887.2	0.722846	0.0594426	147.1	7.46139188602553e-34	1.33158750725746e-32
ENSMUSG00000025779_Ly96	291.215	0.103174	0.201754	0.252182	0.615543	0.721862
ENSMUSG00000042686_Jph1	1.95446	-1.06959	2.20082	-0.460254	1	1
ENSMUSG00000101589_Rbm6-ps1	1.59224	-0.650369	0.828458	0.60347	0.437257	0.5558
ENSMUSG00000067780_Pi15	1.08062	-3.37048	2.06288	3.21651	0.0728987	0.127451
ENSMUSG00000025776_Crispld1	0.833664	-1.36548	2.34152	-0.149958	1	NA
ENSMUSG00000025929_Il17a	110.65	-7.15325	0.718489	73.7682	8.7850092038567e-18	7.79186818187512e-17
ENSMUSG00000041872_Il17f	375.682	-5.5728	0.345835	206.869	6.62336784720396e-47	1.8835325152427e-45
ENSMUSG00000041859_Mcm3	2655	1.38634	0.156443	74.5069	6.04267063576666e-18	5.42481817684962e-17
ENSMUSG00000025931_Paqr8	331.856	2.39467	0.214187	111.443	4.7310053011396e-26	6.22796556366364e-25
ENSMUSG00000041809_Efhc1	3.99642	0.470045	1.45734	0.0247252	0.875054	0.928125
ENSMUSG00000041779_Tram2	151.725	1.06372	0.178526	34.4647	4.34046788917604e-09	2.13372013418408e-08
ENSMUSG00000025933_Tmem14a	41.4764	-1.28823	0.372031	10.9804	0.000920821	0.00246362
ENSMUSG00000025934_Gsta3	2.4501	-3.45802	1.41899	6.28523	0.0121748	0.0260703
ENSMUSG00000099343_Gm28836	5.00341	-3.58799	0.938215	14.7028	0.000125858	0.000383455
ENSMUSG00000025936_Gm4956	104.254	-3.23662	0.283798	116.548	3.60625555852261e-27	4.98349677651066e-26
ENSMUSG00000093963_Gm21909	1.82255	-1.86471	1.38057	0.889054	0.345734	0.464151
ENSMUSG00000067750_Khdc1a	7.09741	-3.67181	0.858292	17.1058	3.53538760377615e-05	0.000115557
ENSMUSG00000085079_Khdc1b	9.94207	-6.66308	0.900603	58.7669	1.77506567285992e-14	1.29560867295149e-13
ENSMUSG00000085679_Gm16328	2.03256	-4.34847	1.15345	14.5392	0.000137271	0.00041539
ENSMUSG00000028033_Kcnq5	25.7839	-5.14866	0.653146	61.3233	4.84312000784749e-15	3.67635965110546e-14
ENSMUSG00000082935_Gm7658	3.86671	0.0536612	0.550308	0.00937348	0.922872	0.962634
ENSMUSG00000026158_Ogfrl1	2657.92	0.72415	0.0908937	62.6473	2.47247111773744e-15	1.91088120619651e-14
ENSMUSG00000097920_Gm7784	0.97214	2.48518	1.31088	3.62003	0.0570879	NA
ENSMUSG00000026156_B3gat2	2.98713	-0.996136	1.58696	-0.322422	1	1
ENSMUSG00000026155_Smap1	777.518	-0.377086	0.0751953	25.0801	5.49985230009955e-07	2.21647748183364e-06
ENSMUSG00000026154_Sdhaf4	366.319	0.309333	0.0728692	17.9879	2.22309121080311e-05	7.46888505477005e-05
ENSMUSG00000026153_Fam135a	99.8922	0.730039	0.297646	5.65588	0.0173969	0.0358083
ENSMUSG00000101939_Gm28438	21.026	-0.0469119	0.373566	0.0150347	0.902411	0.948371
ENSMUSG00000101111_Gm28437	3.9291	0.038525	0.753651	0.00231982	0.961585	0.988474
ENSMUSG00000100862_Gm10925	1.48569	-0.674237	0.938298	0.475664	0.490393	0.607116
ENSMUSG00000102070_Gm28661	1.45993	0.374663	0.984998	0.131384	0.717001	0.804743
ENSMUSG00000101249_Gm29216	3.93239	0.234371	0.539695	0.187732	0.664811	0.763248
ENSMUSG00000073725_Lmbrd1	2725.51	0.53033	0.117599	19.9627	7.8967900979688e-06	2.80447981856157e-05
ENSMUSG00000086240_Gm7846	24.3364	0.333889	0.226222	2.17444	0.140321	0.223012
ENSMUSG00000048874_Phf3	991.365	-0.425476	0.0923597	21.1567	4.23222963361947e-06	1.55400661662039e-05
ENSMUSG00000103783_Gm37522	1.29872	0.872199	3.01203	0.0537162	0.816719	0.885059
ENSMUSG00000104315_Gm37906	5.23009	-1.21043	1.01999	0.810635	0.367933	0.486893
ENSMUSG00000117310_	16.1832	-1.7031	0.338239	25.6141	4.16976755552089e-07	1.70445584851075e-06
ENSMUSG00000026064_Ptp4a1	39.704	-0.605854	0.312507	3.58968	0.0581394	0.104782
ENSMUSG00000070960_Gm19680	1.43335	-0.823356	1.12345	0.477799	0.489421	0.606137
ENSMUSG00000026134_Prim2	320.227	0.631591	0.0899472	49.1057	2.42539684184146e-12	1.54034397838222e-11
ENSMUSG00000103746_1700001G17Rik	1.77175	-2.63518	2.2335	0.764803	0.38183	0.500926
ENSMUSG00000004768_Rab23	50.1713	-0.586934	0.200882	8.46302	0.00362439	0.00871408
ENSMUSG00000042215_Bag2	101.508	0.623786	0.122554	25.9294	3.54137238143036e-07	1.45816293093181e-06
ENSMUSG00000042197_Zfp451	930.343	0.182887	0.167329	1.1672	0.279978	0.393657
ENSMUSG00000081402_Gm15455	1.3943	0.0855502	1.00853	0.00764986	0.930303	0.967413
ENSMUSG00000042182_Bend6	26.1337	-1.62674	0.63526	5.04852	0.024647	0.0489696
ENSMUSG00000026131_Dst	145.708	-0.168001	0.222286	0.557674	0.455199	0.57317
ENSMUSG00000103364_Gm38157	1.54714	-1.30173	1.00493	1.62219	0.202786	0.302947
ENSMUSG00000101462_Gm3052	1.3594	-3.60347	1.93182	3.93069	0.0474124	0.0876583
ENSMUSG00000102336_Gm37233	6.94744	2.0465	0.892192	4.78864	0.0286481	0.0559448
ENSMUSG00000042111_Ccdc115	1065.81	0.0735765	0.106815	0.469374	0.493275	0.609448
ENSMUSG00000101711_Gm28306	0.677501	-2.31486	3.00824	-0.311005	1	NA
ENSMUSG00000026127_Imp4	1597.6	-0.24518	0.0735892	11.0843	0.000870632	0.00233946
ENSMUSG00000026126_Ptpn18	1183.22	1.04614	0.162556	39.875	2.70741928532826e-10	1.47256258348146e-09
ENSMUSG00000100280_Gm28417	16.133	0.196858	0.351754	0.306366	0.579919	0.690051
ENSMUSG00000101223_4930568A12Rik	20.5878	0.115219	0.297056	0.14739	0.701043	0.792269
ENSMUSG00000037509_Arhgef4	57.1454	0.321076	0.20931	2.32285	0.127486	0.205497
ENSMUSG00000104002_Gm38336	3.62456	3.93404	1.16893	9.90553	0.00164783	0.00422076
ENSMUSG00000037503_Fam168b	3153.93	0.421385	0.0547908	58.8588	1.69401840608229e-14	1.23786697633928e-13
ENSMUSG00000104358_Gm37127	4.78734	1.25595	1.19111	1.08567	0.297432	0.412928
ENSMUSG00000026123_Plekhb2	4776.21	0.573447	0.0933659	37.4079	9.58327538103472e-10	4.99952746946904e-09
ENSMUSG00000045216_Hs6st1	961.593	-0.74346	0.0991366	55.6692	8.57501637290563e-14	6.00721267615067e-13
ENSMUSG00000102202_Gm33280	2.80097	0.621421	1.49184	0.0163372	0.898294	0.945554
ENSMUSG00000037470_Uggt1	3263.46	0.638984	0.0704797	81.4096	1.83467256766619e-19	1.76976190762243e-18
ENSMUSG00000047180_Neurl3	7658.91	-2.88546	0.0998719	724.823	1.19676303123321e-159	3.32439956806478e-157
ENSMUSG00000037447_Arid5a	6105.71	-1.7977	0.12154	204.524	2.15055494481643e-46	5.99123352140937e-45
ENSMUSG00000102762_4930403P22Rik	1.96702	-0.420101	1.11713	0.126469	0.722121	0.808838
ENSMUSG00000010453_Kansl3	1225.97	-0.254745	0.0696266	13.3709	0.00025556	0.000745786
ENSMUSG00000037432_Fer1l5	18.7954	-1.14517	0.408149	7.39877	0.00652686	0.0148681
ENSMUSG00000001143_Lman2l	724.47	0.242019	0.123598	3.7855	0.0516986	0.094435
ENSMUSG00000037408_Cnnm4	271.304	-0.5685	0.0991655	32.6579	1.09891168053711e-08	5.21099460189379e-08
ENSMUSG00000104316_Gm37909	1.48731	0.256551	2.51844	0.00064937	0.97967	0.998635
ENSMUSG00000001138_Cnnm3	430.955	-0.714845	0.212517	10.6743	0.00108636	0.00287441
ENSMUSG00000067653_Ankrd23	11.3425	-2.61331	0.646036	14.0996	0.000173383	0.000517234
ENSMUSG00000079610_Ankrd39	209.494	-1.57779	0.30818	23.0523	1.57651122583287e-06	6.04702634891707e-06
ENSMUSG00000026121_Sema4c	891.269	-1.69918	0.487565	8.80731	0.00300025	0.00732652
ENSMUSG00000087589_D430040D24Rik	5.40345	-2.11697	0.70887	8.81526	0.00298721	0.0072984
ENSMUSG00000046337_Fam178b	6.21651	0.213574	0.589486	0.130949	0.71745	0.805116
ENSMUSG00000089906_Gm6428	0.697611	-1.08792	3.02809	0.133586	0.714743	NA
ENSMUSG00000061518_Cox5b	2553.18	0.215372	0.0759356	8.02604	0.00461096	0.0108385
ENSMUSG00000037351_Actr1b	1954.1	0.0952781	0.0866688	1.20577	0.272172	0.384629
ENSMUSG00000102416_4933424G06Rik	1.76213	0.705703	1.70788	0.157391	0.69157	0.785082
ENSMUSG00000026117_Zap70	1322.96	-5.12218	0.232969	351.382	2.11879423911208e-78	1.41010170767574e-76
ENSMUSG00000026116_Tmem131	2988.86	0.351874	0.136372	6.50064	0.0107836	0.0233758
ENSMUSG00000103016_Gm37506	0.849901	0.22132	2.63501	0.0124425	0.911184	NA
ENSMUSG00000102930_Gm38115	32.4057	2.48052	0.488159	21.5647	3.42084250427641e-06	1.26602217183754e-05
ENSMUSG00000103159_F830112A20Rik	0.879449	-0.626865	2.30957	0.100076	0.751739	NA
ENSMUSG00000080054_Rpl12-ps1	3.14984	3.51104	0.935472	14.2322	0.000161586	0.00048415
ENSMUSG00000050122_Vwa3b	11.0463	-3.38911	0.886393	9.03414	0.00264984	0.00653578
ENSMUSG00000026114_Cnga3	5.46195	-2.00825	1.26738	1.322	0.250234	0.359732
ENSMUSG00000026113_Inpp4a	212.016	0.6422	0.192447	10.789	0.00102106	0.00271437
ENSMUSG00000086064_4930439A04Rik	1.72143	0.89186	1.83452	0.282927	0.594789	0.703376
ENSMUSG00000026112_Coa5	3135.97	0.545868	0.0730103	55.5167	9.26678055287232e-14	6.47526003853094e-13
ENSMUSG00000026111_Unc50	1327.58	-0.0979324	0.0681996	2.05881	0.151329	0.237708
ENSMUSG00000026110_Mgat4a	1009.62	-1.65445	0.105156	237.249	1.56486071450047e-53	5.29923768813261e-52
ENSMUSG00000103948_4930594C11Rik	2.32208	-1.82632	1.29949	1.10518	0.293131	0.408139
ENSMUSG00000087233_Gm43213	1.18407	0.469351	1.33051	0.111829	0.738072	0.821905
ENSMUSG00000026090_2010300C02Rik	32.5576	-1.50859	0.733042	3.93076	0.0474106	0.0876583
ENSMUSG00000060771_Tsga10	242.366	-0.322322	0.262911	1.3924	0.238	0.34522
ENSMUSG00000037216_Lipt1	17.6197	0.919947	0.392352	5.24161	0.0220529	0.0443162
ENSMUSG00000026088_Mitd1	337.251	-1.3249	0.146745	78.7528	7.03880612082011e-19	6.62311226891306e-18
ENSMUSG00000026087_Mrpl30	963.871	0.156414	0.139134	1.24745	0.264041	0.375547
ENSMUSG00000058407_Txndc9	1748.1	-0.132468	0.0358511	13.652	0.000220013	0.000647869
ENSMUSG00000026083_Eif5b	1852.22	0.570113	0.0815058	48.4409	3.40402465705025e-12	2.13987998037659e-11
ENSMUSG00000026082_Rev1	225.552	-0.313637	0.117522	7.07564	0.00781389	0.0174657
ENSMUSG00000037138_Aff3	205.367	0.099072	0.189346	0.271352	0.602426	0.709824
ENSMUSG00000085391_Gm16150	1.71297	3.61724	2.37216	2.49788	0.114	0.186659
ENSMUSG00000085280_Gm16151	0.716293	1.70389	2.71148	0.431565	0.511222	NA
ENSMUSG00000087131_Gm16152	0.938526	-1.35481	2.6185	0.149929	0.698603	NA
ENSMUSG00000026080_Chst10	179.454	0.458708	0.17652	6.70618	0.00960793	0.0211018
ENSMUSG00000026078_Pdcl3	1451.38	0.582906	0.108311	28.5601	9.08358486225031e-08	3.97228088192452e-07
ENSMUSG00000103046_Gm37309	6.94878	1.63966	1.02915	1.92089	0.165758	0.256838
ENSMUSG00000026077_Npas2	61.9829	-3.62661	0.563784	34.2557	4.83264695661179e-09	2.36233981681658e-08
ENSMUSG00000073702_Rpl31	1941.02	0.504192	0.164028	9.26578	0.00233475	0.00583293
ENSMUSG00000003134_Tbc1d8	7526.78	2.32809	0.139057	251.693	1.11021461909881e-56	4.11595427548684e-55
ENSMUSG00000003135_Cnot11	754.59	0.166859	0.0867725	3.68937	0.0547602	0.0992989
ENSMUSG00000085894_Gm15832	54.897	-0.656465	0.378789	2.72234	0.0989529	0.165587
ENSMUSG00000077704_Snord89	1.13359	-0.484878	1.49343	0.0855366	0.76993	0.84799
ENSMUSG00000048234_Rnf149	4031.97	-1.23858	0.153673	61.6851	4.03010203812224e-15	3.07626307306607e-14
ENSMUSG00000064936_Gm23722	6.8501	-1.01301	0.519687	3.77401	0.0520546	0.0949677
ENSMUSG00000050967_Creg2	24.8548	-2.95816	0.810094	11.9456	0.000547767	0.00151984
ENSMUSG00000097083_D930019O06Rik	1.18686	-2.38783	3.02092	0.672184	0.412291	0.531778
ENSMUSG00000057173_Rfx8	1.61353	0.112395	2.43738	-0.00111144	1	1
ENSMUSG00000101634_1700066B17Rik	1.65084	2.506	1.49724	0.727764	0.393609	0.513322
ENSMUSG00000026074_Map4k4	1632.42	0.349477	0.0764327	20.8232	5.03683784508496e-06	1.82981559849779e-05
ENSMUSG00000102985_4930456G14Rik	1.44525	2.03228	2.25389	0.837415	0.360137	0.479025
ENSMUSG00000026073_Il1r2	9160	1.39736	0.464942	7.09244	0.00774096	0.017327
ENSMUSG00000097899_Gm16894	27.5909	1.18981	0.470984	5.28412	0.0215208	0.0433378
ENSMUSG00000102975_Gm37347	6.99655	2.31041	0.545154	18.2133	1.97495745955819e-05	6.67736984077471e-05
ENSMUSG00000026072_Il1r1	951.149	-4.92449	0.470384	75.8066	3.12849129691391e-18	2.8486362322066e-17
ENSMUSG00000103560_Gm38070	1.5316	0.924865	2.45308	0.0963687	0.756232	0.836683
ENSMUSG00000070942_Il1rl2	206.495	-4.67544	0.731453	26.6409	2.44998407676087e-07	1.02777073318616e-06
ENSMUSG00000026069_Il1rl1	391.249	-4.36668	0.711345	27.7548	1.37709424145977e-07	5.9287433346944e-07
ENSMUSG00000026070_Il18r1	910.585	-5.58701	0.184994	740.952	3.72209046691671e-163	1.09755858429835e-160
ENSMUSG00000026068_Il18rap	1608.57	-4.92758	0.184135	533.811	4.18570110779144e-118	6.41818665064308e-116
ENSMUSG00000026065_Slc9a4	38.4644	2.1987	0.268624	66.2208	4.03127312160641e-16	3.26227077818676e-15
ENSMUSG00000026062_Slc9a2	43.2855	-4.30825	0.793411	18.4721	1.7240960796458e-05	5.88316709249975e-05
ENSMUSG00000041945_Mfsd9	3.82979	-1.1479	0.755569	2.07316	0.14991	0.235751
ENSMUSG00000060679_Mrps9	562.065	0.304683	0.129267	5.50741	0.0189361	0.038628
ENSMUSG00000041907_Gpr45	9.32894	-1.07528	0.645443	2.53567	0.111299	0.1829
ENSMUSG00000070939_Tgfbrap1	412.769	-0.466809	0.201327	5.12718	0.023554	0.0469977
ENSMUSG00000041878_8430432A02Rik	6.24519	1.23412	1.0069	1.00103	0.317063	0.433864
ENSMUSG00000010290_AI597479	375.302	0.177844	0.160627	1.20816	0.271698	0.384047
ENSMUSG00000008136_Fhl2	243.101	-4.63133	0.668972	33.0868	8.81347052991467e-09	4.2200297188827e-08
ENSMUSG00000066877_Nck2	1132.15	1.41641	0.168159	67.6307	1.97168935463591e-16	1.61847408395317e-15
ENSMUSG00000103945_Gm38228	9.05118	2.73457	1.04734	3.19971	0.0736512	0.128638
ENSMUSG00000026051_1500015O10Rik	0.664893	1.2951	3.02917	0.152034	0.696599	NA
ENSMUSG00000057363_Uxs1	468.537	0.726923	0.129308	30.9948	2.58718331762256e-08	1.18377996297139e-07
ENSMUSG00000090243_Gm16103	0.981564	1.24724	2.29459	-0.0497804	1	NA
ENSMUSG00000100701_Gm19587	2.14849	-0.333281	0.772307	0.181258	0.670294	0.76775
ENSMUSG00000041763_Tpp2	2285.48	-0.548264	0.0805555	45.9456	1.21581463824157e-11	7.32584695730155e-11
ENSMUSG00000047343_Mettl21c	1.48735	-2.90897	2.61783	1.64994	0.198967	0.298147
ENSMUSG00000091844_Gm8251	1.67538	-3.0589	1.62897	1.59605	0.206464	0.307243
ENSMUSG00000026049_Tex30	463.425	-0.252889	0.102327	6.08672	0.0136202	0.0287889
ENSMUSG00000026047_Kdelc1	222.825	1.38159	0.223451	36.1518	1.82533314913844e-09	9.26294955507982e-09
ENSMUSG00000041684_Bivm	97.998	0.788151	0.376997	4.07622	0.043491	0.0813498
ENSMUSG00000026048_Ercc5	394.172	0.349973	0.161592	4.66453	0.0307918	0.0596208
ENSMUSG00000101567_Txn-ps1	1.18774	0.424948	1.37152	0.0737467	0.785958	0.860728
ENSMUSG00000056870_Gulp1	6.10831	-1.27607	1.75979	0.493917	0.482185	0.599354
ENSMUSG00000026043_Col3a1	107.104	-1.29714	0.474622	6.70794	0.00959843	0.0210833
ENSMUSG00000026042_Col5a2	10.6546	-3.45367	1.6539	1.28057	0.257793	0.368438
ENSMUSG00000025995_Wdr75	642.908	0.0771084	0.0738168	1.08989	0.296495	0.411865
ENSMUSG00000084817_Gm5526	5.87666	0.697022	0.505371	1.88024	0.170307	0.262553
ENSMUSG00000025993_Slc40a1	46.7857	-0.722731	0.457646	2.18861	0.139035	0.221262
ENSMUSG00000101262_Gm8326	2.3498	0.678739	0.796908	0.697972	0.403466	0.523329
ENSMUSG00000025986_Slc39a10	397.618	-0.21193	0.165572	1.60742	0.204855	0.305418
ENSMUSG00000100213_Gm28151	2.47213	1.03372	1.54131	0.0323137	0.857341	0.914508
ENSMUSG00000100033_Gm8337	10.1176	0.256074	0.3976	0.410847	0.52154	0.636076
ENSMUSG00000045954_Sdpr	13.2198	-2.06145	1.07163	1.30286	0.253692	0.363616
ENSMUSG00000101702_1700072G22Rik	0.958694	-3.54004	2.73719	-1.11153	1	NA
ENSMUSG00000026107_Nabp1	13804.1	-1.37684	0.15057	78.5253	7.8980467595277e-19	7.40615764382913e-18
ENSMUSG00000099413_Gm17767	31.3029	-0.047231	0.523267	0.00743042	0.931308	0.968077
ENSMUSG00000103424_Gm37535	1.00255	0.997748	3.00729	0.10263	0.748696	NA
ENSMUSG00000018417_Myo1b	106.746	1.49035	0.24951	34.3426	4.62164869623276e-09	2.26671291096964e-08
ENSMUSG00000062939_Stat4	1457.96	-1.92193	0.251963	50.8185	1.01312761895072e-12	6.62525318063065e-12
ENSMUSG00000101628_Gm28177	2.04267	-0.988268	0.97222	0.804942	0.36962	0.488688
ENSMUSG00000078291_Gm3940	3.78996	-1.2914	0.856593	1.90241	0.167809	0.259345
ENSMUSG00000109599_Gm45679	14.5726	-2.50467	0.584966	15.9202	6.606927150011e-05	0.000209072
ENSMUSG00000026104_Stat1	2366.4	-0.0865478	0.108616	0.628809	0.427792	0.546852
ENSMUSG00000099569_Gm18301	0.939415	-3.28353	2.34414	-0.67616	1	NA
ENSMUSG00000026103_Gls	3872.8	-0.0151454	0.0574198	0.0694836	0.79209	0.866056
ENSMUSG00000002881_Nab1	5522.54	-0.90853	0.0710519	160.69	7.99730994219116e-37	1.54054713228119e-35
ENSMUSG00000101501_Rps27a-ps1	0.7898	-2.09389	3.02897	0.596659	0.439856	NA
ENSMUSG00000100120_Gm553	0.753857	-2.77142	2.12172	2.31196	0.128382	NA
ENSMUSG00000043015_Nemp2	483.853	0.138544	0.190525	0.518027	0.471685	0.589706
ENSMUSG00000103630_Gm37242	1.55676	-2.51127	1.46914	2.78644	0.0950655	0.160018
ENSMUSG00000041439_Mfsd6	2861.54	0.669123	0.140543	22.3043	2.32685086801613e-06	8.76720082313056e-06
ENSMUSG00000026102_Inpp1	796.078	0.225049	0.128755	3.02887	0.0817952	0.140733
ENSMUSG00000041426_Hibch	193.404	-0.260379	0.132142	3.8625	0.0493766	0.0907226
ENSMUSG00000043629_1700019D03Rik	3.34458	-0.770343	0.923059	0.492889	0.482642	0.599766
ENSMUSG00000026098_Pms1	168.763	-0.357362	0.0974324	13.4272	0.000247998	0.000724821
ENSMUSG00000026097_Ormdl1	443.108	-0.550336	0.124071	19.3689	1.07747957024332e-05	3.75696760466686e-05
ENSMUSG00000026096_Osgepl1	80.2775	-0.773983	0.268309	7.88775	0.00497708	0.0116209
ENSMUSG00000026095_Asnsd1	130.635	0.411524	0.158498	6.67022	0.0098037	0.0214801
ENSMUSG00000096141_Dnah7a	0.638817	-1.59391	3.02879	0.324564	0.568878	NA
ENSMUSG00000026094_Stk17b	14872.6	-0.85952	0.0991981	73.9319	8.08582556462671e-18	7.18502636055633e-17
ENSMUSG00000042807_Hecw2	28.1041	-0.537066	0.475304	1.13421	0.28688	0.401009
ENSMUSG00000025983_Ccdc150	2.32877	-0.689629	1.71337	0.0280798	0.866921	0.922051
ENSMUSG00000041303_Gtf3c3	312.126	0.00698218	0.207721	0.00107766	0.973812	0.99514
ENSMUSG00000073678_Pgap1	82.3216	-0.310693	0.270013	1.27848	0.258182	0.368691
ENSMUSG00000104136_Gm36955	1.24964	1.57969	2.87891	-0.185667	1	1
ENSMUSG00000052331_Ankrd44	2264.24	-0.535854	0.098252	29.3068	6.17779598598943e-08	2.73463777513763e-07
ENSMUSG00000101674_4930444A19Rik	4.23292	-1.57447	0.673974	5.29394	0.0213998	0.0431168
ENSMUSG00000102503_Gm37370	17.4441	-1.67315	0.342214	23.9608	9.83154149454794e-07	3.85881515786126e-06
ENSMUSG00000102642_A130048G24Rik	6.61496	-0.568858	0.909428	0.304259	0.581225	0.691131
ENSMUSG00000025982_Sf3b1	14075.5	-0.175597	0.0421563	17.3391	3.12679021131735e-05	0.000103028
ENSMUSG00000103030_E330011M16Rik	11.7018	-0.208125	0.700172	0.0771606	0.781183	0.857114
ENSMUSG00000025981_Coq10b	5175.19	-0.171509	0.0541151	10.0226	0.00154632	0.00397991
ENSMUSG00000101122_Gm17971	54.1663	-0.628268	0.286508	4.70235	0.0301214	0.0584764
ENSMUSG00000025980_Hspd1	5189.23	0.29114	0.0916534	10.0107	0.00155635	0.00400357
ENSMUSG00000073676_Hspe1	2238.99	0.777354	0.112476	46.7521	8.05565714215508e-12	4.93142064655658e-11
ENSMUSG00000025979_Mob4	1701.69	-0.668877	0.0805402	68.2236	1.45966522327592e-16	1.2074839591942e-15
ENSMUSG00000025978_Rftn2	16.8825	-0.987024	0.397436	6.03849	0.0139973	0.0295078
ENSMUSG00000046994_Mars2	157.111	0.129126	0.162594	0.620413	0.430894	0.549823
ENSMUSG00000025977_Boll	18.4422	-1.58888	0.681268	5.23668	0.0221154	0.0444325
ENSMUSG00000100215_Gm8292	1.3196	0.158243	1.08478	0.0178086	0.893839	0.942259
ENSMUSG00000038349_Plcl1	254.398	0.0212629	0.231593	0.00830205	0.927401	0.965325
ENSMUSG00000102145_Gm38056	11.3546	0.24321	0.365116	0.432292	0.510866	0.625872
ENSMUSG00000038331_Satb2	4.79187	2.49684	1.28185	3.01144	0.0826787	0.141967
ENSMUSG00000087022_9130024F11Rik	0.717486	2.17024	2.19682	1.42744	0.232183	NA
ENSMUSG00000097519_4930558J18Rik	5.71617	2.92785	1.47901	1.31562	0.251379	0.361102
ENSMUSG00000038323_1700066M21Rik	71.1894	-0.397818	0.330895	1.34568	0.246034	0.35478
ENSMUSG00000048495_Tyw5	207.526	-0.38975	0.0878913	19.6713	9.19717790319819e-06	3.2369134937679e-05
ENSMUSG00000025971_Maip1	332.349	0.311324	0.0794776	15.3236	9.05789779553694e-05	0.000281839
ENSMUSG00000038305_Spats2l	5.71779	-1.39578	1.31283	0.716743	0.397214	0.516969
ENSMUSG00000054770_Kctd18	273.83	-0.20633	0.118277	3.01857	0.0823158	0.141464
ENSMUSG00000026039_Sgol2a	22.0405	0.836747	0.302893	7.39781	0.00653032	0.0148742
ENSMUSG00000063558_Aox1	1.76092	1.45589	2.97652	0.15261	0.696053	0.78849
ENSMUSG00000064294_Aox3	5.32355	-0.839718	1.13686	0.234055	0.628533	0.732391
ENSMUSG00000079554_Aox2	3.50196	-0.553318	0.7684	0.488577	0.484563	0.601646
ENSMUSG00000103839_Gm37607	1.50931	1.51195	1.30723	1.57589	0.209353	0.310795
ENSMUSG00000051223_Bzw1	10924.4	-0.16529	0.0875956	3.54777	0.0596255	0.107108
ENSMUSG00000026034_Clk1	5270.1	-0.301233	0.0497781	36.5091	1.51958999083815e-09	7.77522193123195e-09
ENSMUSG00000026035_Ppil3	222.422	0.075206	0.119833	0.390758	0.531901	0.64571
ENSMUSG00000026036_Nif3l1	330.558	0.0685862	0.171678	0.156847	0.692076	0.785425
ENSMUSG00000026037_Orc2	394.608	-0.0990096	0.0798332	1.53397	0.215517	0.318074
ENSMUSG00000085054_Gm15834	1.05686	-1.27741	3.01473	0.138598	0.709678	0.798826
ENSMUSG00000038174_Fam126b	175.956	-0.336253	0.238462	1.88794	0.169434	0.261435
ENSMUSG00000026032_Ndufb3	1331.65	-0.0110557	0.125522	0.00770067	0.930073	0.967318
ENSMUSG00000047528_Als2cr12	10.3168	-0.410208	0.897086	0.19252	0.660827	0.760132
ENSMUSG00000102059_Gm20257	55.4014	-0.805862	0.241867	10.7569	0.00103889	0.00275718
ENSMUSG00000026031_Cflar	1425.61	0.0228023	0.0559801	0.165752	0.683915	0.779207
ENSMUSG00000026029_Casp8	2496.2	-1.04439	0.0665434	241.97	1.46262139574529e-54	5.11570516281933e-53
ENSMUSG00000102719_Gm37760	12.7377	-0.571498	0.503598	1.25234	0.263105	0.374383
ENSMUSG00000099719_Gm28802	5.3124	0.026974	0.563218	0.00218173	0.962745	0.988815
ENSMUSG00000026028_Trak2	746.551	-0.0891656	0.124024	0.513467	0.473642	0.591728
ENSMUSG00000026027_Stradb	388.032	0.969615	0.0859927	126.013	3.05485997706137e-29	4.62134973799016e-28
ENSMUSG00000038079_Tmem237	120.561	-0.24341	0.155865	2.42538	0.119384	0.194374
ENSMUSG00000097573_G730003C15Rik	3.06676	1.86304	0.868212	3.90302	0.0481993	0.0889245
ENSMUSG00000101586_Gm29017	1.55097	2.59655	1.44946	3.31515	0.068644	0.121017
ENSMUSG00000026024_Als2	544.909	1.30171	0.113936	127.043	1.81833022318405e-29	2.77262811358542e-28
ENSMUSG00000026023_Cdk15	2.4165	1.51618	1.27116	1.09415	0.295554	0.410818
ENSMUSG00000041075_Fzd7	186.941	0.851082	0.204907	16.8094	4.13279261016457e-05	0.000133806
ENSMUSG00000097819_Gm26813	2.65691	1.64058	1.06885	1.99484	0.157835	0.246234
ENSMUSG00000047361_Gm973	16.2504	-2.23304	0.919368	2.56143	0.109499	0.1804
ENSMUSG00000099811_Gm28411	1.87235	3.89479	1.77713	4.76843	0.0289862	0.0565129
ENSMUSG00000026021_Sumo1	3458.37	-0.131183	0.0471193	7.74006	0.00540089	0.0125053
ENSMUSG00000103821_D430013B06Rik	6.48194	-1.58307	0.734027	3.6506	0.0560489	0.101386
ENSMUSG00000026020_Nop58	2330.99	0.0898045	0.121039	0.548437	0.458957	0.576842
ENSMUSG00000077345_Snord70	0.773306	0.666275	2.25561	0.138458	0.709819	NA
ENSMUSG00000089512_Gm26287	1.35428	0.674909	1.39194	0.232724	0.629511	0.733129
ENSMUSG00000067336_Bmpr2	142.629	0.42307	0.270885	2.28876	0.130314	0.209401
ENSMUSG00000041040_Fam117b	2432.44	0.246785	0.0709152	12.0543	0.00051674	0.00143959
ENSMUSG00000103696_Gm37531	31.0908	-0.0109687	0.38903	0.000718263	0.978619	0.997988
ENSMUSG00000100901_Gm18829	1.41687	1.11246	2.9848	0.123014	0.725788	0.811952
ENSMUSG00000026018_Ica1l	9.46085	-0.549296	0.741859	0.420627	0.516625	0.631192
ENSMUSG00000026019_Wdr12	506.365	0.95701	0.0988976	91.9901	8.71105246215597e-22	9.43303630181601e-21
ENSMUSG00000026017_Carf	43.7005	-1.04372	0.173515	36.6206	1.43509532948963e-09	7.36451731735684e-09
ENSMUSG00000082609_Gm15464	1.32956	-0.122794	1.12971	0.01049	0.918423	0.95979
ENSMUSG00000073664_Nbeal1	194.382	-0.347422	0.121023	8.2168	0.00415043	0.00985155
ENSMUSG00000049439_Cyp20a1	559.147	0.354738	0.0927646	14.5943	0.000133315	0.000404503
ENSMUSG00000103822_6030460B20Rik	0.73713	-2.85145	3.00487	1.39873	0.236937	NA
ENSMUSG00000026782_Abi2	556.57	1.3182	0.183361	50.0267	1.51669090037415e-12	9.7781414354091e-12
ENSMUSG00000026014_Raph1	106.65	-0.782708	0.228807	11.5185	0.000689065	0.00188112
ENSMUSG00000081562_Gm11575	0.977649	-0.422755	1.6771	0.084288	0.771568	NA
ENSMUSG00000101188_Eif4a-ps4	56.9106	0.120157	0.171813	0.487738	0.484938	0.602037
ENSMUSG00000026012_Cd28	978.056	-3.114	0.252255	125.087	4.87007562302385e-29	7.29825953608274e-28
ENSMUSG00000086795_Gm11579	0.692255	-2.6548	2.76801	1.37297	0.241303	NA
ENSMUSG00000104069_Gm37198	1.37828	-2.4612	1.84829	1.94301	0.163342	0.253669
ENSMUSG00000026011_Ctla4	595.042	1.19619	0.212605	29.3008	6.19698638159857e-08	2.742499145142e-07
ENSMUSG00000081382_Rpl18-ps1	38.514	0.248723	0.278507	0.779111	0.377413	0.49656
ENSMUSG00000026009_Icos	8659.8	-4.50788	0.104613	1419.54	1.19413762732611e-310	1.63485970735425e-307
ENSMUSG00000102561_Gm37039	22.7224	-5.86877	0.66358	107.135	4.15897702686998e-25	5.23065043792762e-24
ENSMUSG00000052062_Pard3b	29.3007	-0.7326	0.557262	1.38684	0.23894	0.346269
ENSMUSG00000025969_Nrp2	1150.22	1.26188	0.183104	45.8234	1.29409935397137e-11	7.78531146188613e-11
ENSMUSG00000100811_Gm29083	1.00063	2.3971	1.942	1.90052	0.16802	NA
ENSMUSG00000103032_Gm37121	4.37306	1.6637	0.992849	2.22522	0.135774	0.216792
ENSMUSG00000040865_Ino80d	215.552	0.0955507	0.171912	0.30143	0.582987	0.692754
ENSMUSG00000084799_Ino80dos	19.3818	-2.22618	0.644812	8.34056	0.00387696	0.00925055
ENSMUSG00000101599_Gm20342	23.5019	-1.56443	0.489489	8.43094	0.00368889	0.00884476
ENSMUSG00000025968_Ndufs1	1678.9	0.0429186	0.0563549	0.579883	0.446358	0.564151
ENSMUSG00000025967_Eef1b2	3551.33	1.39001	0.12151	125.303	4.36944104396587e-29	6.55826754030492e-28
ENSMUSG00000064602_Snora41	9.67484	0.27378	0.399617	0.460371	0.49745	0.613436
ENSMUSG00000027520_Zdbf2	35.3069	-0.901939	0.467471	3.56635	0.0589618	0.106072
ENSMUSG00000081643_Gm11605	1.03044	-0.55344	1.02558	0.279372	0.597113	0.705359
ENSMUSG00000025964_Adam23	2911.55	4.45395	0.214085	319.488	1.87240111105025e-71	1.05553859104412e-69
ENSMUSG00000025962_Fastkd2	405.695	-0.345906	0.204532	2.77817	0.0955571	0.16076
ENSMUSG00000025959_Klf7	587.604	-0.840428	0.106976	60.8249	6.23836494719074e-15	4.69088822843487e-14
ENSMUSG00000086836_Gm13748	1.93959	1.70535	1.0883	2.38236	0.122712	0.199024
ENSMUSG00000025958_Creb1	1322.05	-0.590462	0.147797	15.5449	8.05704797193255e-05	0.000252831
ENSMUSG00000025956_Mettl21a	220.01	0.786747	0.137945	32.025	1.52200554638021e-08	7.11519031889497e-08
ENSMUSG00000087213_2810408I11Rik	45.5479	2.4533	0.351739	43.6792	3.86865782398408e-11	2.24766791489248e-10
ENSMUSG00000070871_Ccnyl1	307.658	1.60478	0.0936768	289.61	6.04701341194349e-65	2.7861323573731e-63
ENSMUSG00000045005_Fzd5	109.933	-0.549697	0.210847	6.69145	0.00968765	0.0212598
ENSMUSG00000051344_Plekhm3	1029.06	1.42452	0.128445	117.555	2.16961311306615e-27	3.02436178459192e-26
ENSMUSG00000084416_Rpl10a-ps1	82.0689	0.58099	0.191512	9.04643	0.00263208	0.00649447
ENSMUSG00000025955_Akr1cl	5.36109	-0.102537	0.801119	0.0159864	0.899386	0.946264
ENSMUSG00000044816_D630023F18Rik	3.19024	-0.860307	1.1958	0.489156	0.484304	0.601403
ENSMUSG00000025950_Idh1	1742.49	0.207179	0.116346	3.1384	0.0764689	0.132761
ENSMUSG00000025949_Pikfyve	310.744	-0.121063	0.130406	0.858266	0.354224	0.47313
ENSMUSG00000015222_Map2	9.53366	3.60191	1.08163	9.24939	0.00235573	0.00588192
ENSMUSG00000055567_Unc80	1.57707	0.575097	2.31681	0.040707	0.840105	0.902696
ENSMUSG00000026005_Rpe	1379.27	0.222903	0.0988725	5.03372	0.0248585	0.0493283
ENSMUSG00000026004_Kansl1l	224.928	-0.896571	0.14599	37.1031	1.12042880123181e-09	5.81040552846592e-09
ENSMUSG00000102559_Gm37570	1.51173	0.0629358	1.3249	0.00132929	0.970916	0.99345
ENSMUSG00000102374_Gm38387	4.74779	0.265591	1.01746	0.0468002	0.828728	0.893879
ENSMUSG00000102776_Gm38162	1.80847	0.568632	1.32156	0.11951	0.729567	0.815133
ENSMUSG00000103706_6820402A03Rik	9.68683	0.729077	0.77156	0.685898	0.407563	0.526978
ENSMUSG00000103756_Gm37285	3.49027	-1.26783	1.76309	0.0799489	0.777367	0.854101
ENSMUSG00000103553_Gm38218	2.18717	-2.61216	1.46635	2.40699	0.120795	0.196276
ENSMUSG00000026003_Acadl	3974.92	1.4346	0.0856357	269.838	1.23070285606229e-60	5.0947908514354e-59
ENSMUSG00000026000_Lancl1	709.759	0.346312	0.101003	11.6552	0.000640224	0.00175905
ENSMUSG00000025997_Ikzf2	144.441	-3.03764	0.302766	87.4746	8.53702470521951e-21	8.77368110053311e-20
ENSMUSG00000099954_Gm28112	0.688059	-1.29521	3.02618	0.239553	0.624529	NA
ENSMUSG00000045648_Vwc2l	1.16709	-2.13808	3.0168	0.462814	0.496312	0.612268
ENSMUSG00000026196_Bard1	25.4874	0.409746	0.369831	1.1869	0.275955	0.388943
ENSMUSG00000026192_Atic	205.435	0.493969	0.198865	5.99235	0.014368	0.0301932
ENSMUSG00000026193_Fn1	938.575	-2.16733	0.267418	58.0534	2.5509250325426e-14	1.84852854815667e-13
ENSMUSG00000100319_Gm5256	0.907001	0.0655634	1.25124	0.00477647	0.9449	NA
ENSMUSG00000101496_Gm8885	0.813349	2.18474	1.53277	2.417	0.120024	NA
ENSMUSG00000102123_Gm4319	1.52124	-1.13139	2.45983	0.202668	0.652576	0.753353
ENSMUSG00000039395_Mreg	2960.56	1.90967	0.237287	56.6899	5.10237821666224e-14	3.6351685322075e-13
ENSMUSG00000094655_Gm25360	1.50136	-1.07624	1.71584	-0.00518484	1	1
ENSMUSG00000026189_Pecr	68.3587	-0.714485	0.186685	14.5853	0.000133957	0.000406259
ENSMUSG00000026187_Xrcc5	245.385	-3.31614	0.193584	263.136	3.556833253027e-59	1.40275355886355e-57
ENSMUSG00000039372_March4	1.42543	0.67511	2.92049	0.0528465	0.818182	0.885944
ENSMUSG00000039354_Smarcal1	470.725	0.29653	0.113789	6.72348	0.00951518	0.0209196
ENSMUSG00000046330_Rpl37a	5840.91	0.180037	0.145192	1.51421	0.218497	0.321772
ENSMUSG00000026185_Igfbp5	8.73167	0.0458048	1.35729	0.000222469	0.9881	1
ENSMUSG00000055322_Tns1	227.563	0.412227	0.208077	3.90537	0.0481319	0.0888428
ENSMUSG00000061815_Rufy4	11.6862	-2.5656	0.800432	7.38357	0.00658223	0.0149764
ENSMUSG00000026180_Cxcr2	17.6291	-3.82063	0.770362	18.2844	1.902602917717e-05	6.44296645298264e-05
ENSMUSG00000006304_Arpc2	33056.7	0.794643	0.0972417	65.3691	6.2105441638219e-16	4.96610346215996e-15
ENSMUSG00000064272_Gpbar1	7.05303	0.949014	1.05896	0.593481	0.441076	0.55932
ENSMUSG00000006299_Aamp	4252.7	0.226606	0.0493177	21.0877	4.38742697345834e-06	1.60914299273395e-05
ENSMUSG00000026179_Pnkd	674.272	0.947424	0.211843	18.6389	1.57961173167282e-05	5.40940111863013e-05
ENSMUSG00000103013_Gm37503	5.45998	0.568164	0.551363	1.00518	0.316061	0.432927
ENSMUSG00000006301_Tmbim1	2643.78	0.373074	0.131715	7.86696	0.00503461	0.0117311
ENSMUSG00000103403_Gm37931	1.29834	2.03617	3.00416	0.501064	0.479033	0.596946
ENSMUSG00000073650_Catip	37.8485	0.243533	0.52003	0.184254	0.667742	0.765742
ENSMUSG00000026177_Slc11a1	2395.88	-0.443894	0.289513	2.06573	0.150643	0.236747
ENSMUSG00000026176_Ctdsp1	249.462	-0.424704	0.189495	4.89148	0.0269895	0.05309
ENSMUSG00000026175_Vil1	15.6293	2.62868	0.666432	13.7555	0.000208214	0.000614352
ENSMUSG00000033364_Usp37	893.868	-0.225804	0.0788867	8.16946	0.00426017	0.0100858
ENSMUSG00000103227_Gm37733	9.24983	-1.07004	0.536678	3.79456	0.0514194	0.0940596
ENSMUSG00000026174_Cnot9	976.899	0.390847	0.0882517	19.4872	1.01274252944726e-05	3.54284286583604e-05
ENSMUSG00000026173_Plcd4	2.43243	-0.0790794	1.13692	0.00449896	0.946523	0.978058
ENSMUSG00000026135_Zfp142	213.527	-0.496669	0.163247	9.19085	0.00243228	0.00605528
ENSMUSG00000026172_Bcs1l	112.942	0.208571	0.1358	2.3501	0.125275	0.202578
ENSMUSG00000026171_Rnf25	380.623	-0.0917956	0.138946	0.431678	0.511167	0.62616
ENSMUSG00000033276_Stk36	2.33001	1.10246	1.03715	0.93031	0.334782	0.45281
ENSMUSG00000033257_Ttll4	510.568	1.09497	0.0866477	157.781	3.4555120975546e-36	6.57714005698402e-35
ENSMUSG00000026170_Cyp27a1	2582.52	1.35365	0.256156	24.7265	6.60699728681798e-07	2.63990654568356e-06
ENSMUSG00000006542_Prkag3	1.75059	-1.62465	3.00634	0.188787	0.663928	0.762692
ENSMUSG00000033227_Wnt6	17.529	-0.815472	0.484978	2.6191	0.105584	0.175018
ENSMUSG00000099472_Gm29539	1.32039	0.639073	1.25797	0.222434	0.637192	0.739781
ENSMUSG00000026167_Wnt10a	24.9445	-4.5911	0.874145	21.0864	4.39024461879365e-06	1.60986834911838e-05
ENSMUSG00000026162_Nhej1	86.5485	0.155044	0.201715	0.587891	0.443236	0.561204
ENSMUSG00000026205_Slc23a3	2.48604	0.443023	1.47588	0.0736454	0.786101	0.860823
ENSMUSG00000033159_Cnppd1	2858.48	-0.780122	0.0501813	239.313	5.55159804089237e-54	1.91380359082345e-52
ENSMUSG00000049339_Fam134a	1442.68	-0.655396	0.0611265	114.077	1.2531579549264e-26	1.68911944599679e-25
ENSMUSG00000026197_Zfand2b	790.79	-0.393653	0.0656314	35.8895	2.08826972786446e-09	1.05581286926874e-08
ENSMUSG00000026198_Abcb6	5.27831	0.254396	0.5169	0.240795	0.623632	0.728896
ENSMUSG00000033124_Atg9a	486.337	-0.820866	0.142131	32.6887	1.08162887249846e-08	5.13539276670252e-08
ENSMUSG00000026199_Ankzf1	375.729	-0.259265	0.181047	2.01228	0.15603	0.243795
ENSMUSG00000026200_Glb1l	159.354	0.866222	0.129555	44.1413	3.05504156997511e-11	1.79509447491456e-10
ENSMUSG00000026201_Stk16	1012.73	-0.283714	0.0682097	17.262	3.25638541326178e-05	0.000107095
ENSMUSG00000026202_Tuba4a	6069.11	-1.68478	0.14558	124.146	7.82827510642695e-29	1.15596724934426e-27
ENSMUSG00000026203_Dnajb2	1503.42	-0.299436	0.0959666	9.71075	0.00183194	0.00465871
ENSMUSG00000026204_Ptprn	5.93498	-2.87868	0.752609	14.4124	0.000146835	0.000442861
ENSMUSG00000026209_Dnpep	1041.67	-0.0174985	0.0583986	0.0897282	0.764523	0.843276
ENSMUSG00000026208_Des	122.423	-0.645594	0.206889	9.48754	0.00206872	0.00522276
ENSMUSG00000026207_Speg	9.05299	-1.00419	0.966638	0.579092	0.446668	0.564469
ENSMUSG00000033021_Gmppa	1130.39	0.310615	0.105622	8.55715	0.00344167	0.00831022
ENSMUSG00000032997_Chpf	1054.78	-0.121631	0.0734129	2.74033	0.0978446	0.164105
ENSMUSG00000026211_Obsl1	9.71135	-1.15165	0.870561	1.00609	0.315841	0.43278
ENSMUSG00000051703_Tmem198	62.3581	-1.75173	0.380605	19.6779	9.16536779829125e-06	3.22631046078693e-05
ENSMUSG00000032968_Inha	1.05895	-2.0468	3.021	0.424796	0.514553	0.629344
ENSMUSG00000026213_Stk11ip	753.574	-0.388629	0.0812748	22.7829	1.81368833298701e-06	6.9125003536214e-06
ENSMUSG00000006576_Slc4a3	9.19668	3.73253	1.48053	2.70422	0.100083	0.167099
ENSMUSG00000026235_Epha4	5.56126	-0.705683	1.30858	-0.0447904	1	1
ENSMUSG00000032908_Sgpp2	3.0684	2.32048	1.91331	0.642442	0.422828	0.541988
ENSMUSG00000026245_Farsb	1336.65	0.723105	0.0929617	59.658	1.12856899262433e-14	8.34862287982653e-14
ENSMUSG00000104018_4833412K13Rik	2.94	1.44091	1.29552	0.659635	0.416689	0.536183
ENSMUSG00000032883_Acsl3	253.04	-1.18048	0.135735	73.702	9.08456312079366e-18	8.0426707314666e-17
ENSMUSG00000079470_Utp14b	96.9267	-0.897699	0.295899	9.07465	0.00259178	0.0064041
ENSMUSG00000047330_Kcne4	7.18676	-2.01618	1.04269	1.96669	0.1608	0.250204
ENSMUSG00000072978_Gm5830	3.15691	-0.306685	0.725647	0.172325	0.678054	0.774417
ENSMUSG00000054702_Ap1s3	42.8234	1.74364	0.536551	8.31432	0.00393336	0.00937463
ENSMUSG00000073643_Wdfy1	1071.89	0.0288439	0.157127	0.0332113	0.855395	0.912983
ENSMUSG00000104497_Gm10555	0.860155	-1.65145	2.18939	0.286048	0.592764	NA
ENSMUSG00000026248_Mrpl44	277.139	-0.375324	0.14566	6.5458	0.0105132	0.0228621
ENSMUSG00000026249_Serpine2	45.0437	-1.26184	0.546767	4.0179	0.0450197	0.0838329
ENSMUSG00000067106_Gm5529	0.985832	-0.459345	1.60058	0.0458148	0.830513	NA
ENSMUSG00000043230_Fam124b	44.7645	-6.3571	0.703306	75.2446	4.1587435125484e-18	3.76704333199504e-17
ENSMUSG00000004364_Cul3	3260.38	-0.591547	0.0928058	40.3101	2.16689079860984e-10	1.18834895384706e-09
ENSMUSG00000103076_Gm37902	2.11853	-4.33692	2.42203	-0.923723	1	1
ENSMUSG00000103525_Gm37262	2.01529	1.58845	1.40863	1.36419	0.242813	0.350954
ENSMUSG00000101483_1700016L21Rik	19.6244	-6.70632	0.860178	65.9937	4.52376093464867e-16	3.64314814430298e-15
ENSMUSG00000038608_Dock10	7512.29	0.321253	0.0719306	19.9058	8.1351231563942e-06	2.88484561588543e-05
ENSMUSG00000103192_Gm37645	8.34368	-0.586535	1.05495	0.280594	0.596312	0.704699
ENSMUSG00000104488_Gm38062	19.1898	-1.78692	0.539154	8.93004	0.00280519	0.00688615
ENSMUSG00000102721_A630081D01Rik	18.9834	-1.94134	0.648214	6.745	0.00940106	0.0206901
ENSMUSG00000087008_Gm5530	2.49001	0.266396	0.715959	0.128503	0.719989	0.807067
ENSMUSG00000026142_Rhbdd1	617.404	-0.489139	0.115949	17.5412	2.81147811459571e-05	9.32311436374671e-05
ENSMUSG00000104493_Gm19552	2.50331	0.689697	0.982877	0.554497	0.456486	0.57464
ENSMUSG00000079465_Col4a3	2.12984	-1.41665	1.42473	0.406188	0.523911	0.638006
ENSMUSG00000097564_C430014B12Rik	1.61517	-2.8485	2.9977	0.672593	0.412149	0.531663
ENSMUSG00000026150_Mff	2058.52	0.102732	0.064521	2.52803	0.11184	0.18364
ENSMUSG00000100170_Gm28942	2.10339	-1.67349	1.14217	2.38637	0.122398	0.198594
ENSMUSG00000100744_Gm17764	1.6605	-0.424696	1.09947	0.182499	0.669234	0.766949
ENSMUSG00000026159_Agfg1	2226.86	0.178574	0.0460372	15.0317	0.00010572	0.000325413
ENSMUSG00000026166_Ccl20	12.6737	-5.80656	0.973194	35.6373	2.37687422862241e-09	1.19448212742543e-08
ENSMUSG00000045658_Pid1	2689.17	1.52481	0.256886	30.9589	2.63555776081823e-08	1.20533847772854e-07
ENSMUSG00000036766_Dner	0.652132	-1.91213	3.03048	0.516825	0.472199	NA
ENSMUSG00000026219_Trip12	1893.37	-0.315959	0.0559006	31.8569	1.65955575487822e-08	7.72055950333758e-08
ENSMUSG00000104503_Gm37738	1.77296	-1.89781	1.31152	2.61841	0.10563	0.175079
ENSMUSG00000073633_Fbxo36	30.0519	0.0447837	0.362274	0.0146773	0.903572	0.949182
ENSMUSG00000026220_Slc16a14	25.5652	5.28967	0.642233	69.224	8.78899127941967e-17	7.3885349058174e-16
ENSMUSG00000096802_Gm15433	10.7922	3.63905	0.586303	40.3548	2.11784378592591e-10	1.16278177727992e-09
ENSMUSG00000052477_C130026I21Rik	5.79143	-0.574831	0.621993	0.747126	0.387388	0.506588
ENSMUSG00000064281_Rpl19-ps1	2.28861	0.227789	0.72164	0.0981553	0.754055	0.835139
ENSMUSG00000061852_Gm7582	5.66064	2.27507	0.745286	8.09045	0.00444992	0.0104936
ENSMUSG00000101279_Gm18342	9.89454	1.16796	0.463321	6.118	0.0133812	0.0283557
ENSMUSG00000089844_A530032D15Rik	131.147	1.82901	0.318323	28.6024	8.8871451764031e-08	3.88992718876726e-07
ENSMUSG00000073631_Gm10553	0.93186	2.03934	1.26887	2.60596	0.106463	NA
ENSMUSG00000072109_A530040E14Rik	244.416	2.08974	0.250782	61.6619	4.07794179768073e-15	3.11030284266401e-14
ENSMUSG00000079457_Gm7609	27.45	3.59981	0.42395	68.6559	1.17230735701157e-16	9.77790039679755e-16
ENSMUSG00000079455_Gm16026	2.01506	1.49875	0.873209	2.89356	0.0889342	0.151224
ENSMUSG00000090186_Gm7592	24.9257	5.93654	0.607153	183.296	9.24100335635866e-42	2.1839989066748e-40
ENSMUSG00000070034_Sp110	2221.47	0.0275766	0.132875	0.0426223	0.836438	0.899866
ENSMUSG00000090103_Gm16094	2.90798	2.33099	0.771542	9.27584	0.00232196	0.00580325
ENSMUSG00000070031_Sp140	1752.69	1.87264	0.268105	42.3544	7.61457127571806e-11	4.33725074715269e-10
ENSMUSG00000073628_Gm10552	4.32885	3.15337	0.77701	17.0624	3.61716808060553e-05	0.000118049
ENSMUSG00000090246_Gm17017	9.57742	1.38104	0.616872	4.28687	0.0384078	0.0726212
ENSMUSG00000026222_Sp100	9094.3	-0.577001	0.126069	20.5293	5.87262304690835e-06	2.11858772708625e-05
ENSMUSG00000052760_A630001G21Rik	360.143	-0.144054	0.228757	0.372874	0.541442	0.654339
ENSMUSG00000036707_Cab39	3979.86	-0.39594	0.0805659	24.0679	9.29963578952397e-07	3.65408198396486e-06
ENSMUSG00000026223_Itm2c	15124.3	0.777279	0.116263	43.5289	4.17746547705581e-11	2.41828694650343e-10
ENSMUSG00000026224_4933407L21Rik	0.758343	-1.23278	2.79602	0.00124513	0.971851	NA
ENSMUSG00000099767_Gm28884	3.59966	0.415252	1.49248	0.0762734	0.782413	0.858218
ENSMUSG00000049608_Gpr55	151.734	0.896505	0.269158	10.6689	0.0010895	0.00288192
ENSMUSG00000100108_Gm28100	8.69087	1.34468	0.482965	7.4886	0.00620909	0.0142084
ENSMUSG00000099342_Gm18180	0.752517	0.569678	1.81872	0.0936777	0.759553	NA
ENSMUSG00000026226_Spata3	1.20237	-0.151087	2.32339	0.00508982	0.943125	0.976274
ENSMUSG00000026227_2810459M11Rik	243.675	-5.89095	0.962142	25.2915	4.92864649669825e-07	2.00015598988387e-06
ENSMUSG00000026229_Psmd1	3463.47	0.429764	0.0931829	21.1704	4.2021514857877e-06	1.5435538046779e-05
ENSMUSG00000026228_Htr2b	0.961935	0.249953	2.51656	0.00419767	0.948342	NA
ENSMUSG00000062590_Armc9	98.5996	-0.335259	0.132404	6.39486	0.0114451	0.0246676
ENSMUSG00000087538_Gm16341	6.44292	-5.49695	0.928996	38.0872	6.76535001625104e-10	3.57024955290428e-09
ENSMUSG00000079445_B3gnt7	31.2581	-3.10442	0.636326	19.5826	9.63407302251303e-06	3.38446256639493e-05
ENSMUSG00000026234_Ncl	10705.2	-0.0520728	0.0388183	1.799	0.179833	0.27441
ENSMUSG00000073627_C130036L24Rik	19.1441	-0.299216	0.288501	1.07207	0.300478	0.416012
ENSMUSG00000026237_Nmur1	6.80204	-3.94486	1.07821	13.2082	0.000278731	0.000808603
ENSMUSG00000026238_Ptma	13094.8	0.35976	0.068173	27.697	1.41886195952234e-07	6.09897447368575e-07
ENSMUSG00000026239_Pde6d	645.526	-0.216679	0.0922295	5.49084	0.0191164	0.038946
ENSMUSG00000026240_Cops7b	325.072	0.473058	0.0741175	40.6418	1.82850805019443e-10	1.00883747259864e-09
ENSMUSG00000026241_Nppc	18.0664	6.06313	0.775908	83.3269	6.95475416870575e-20	6.85003973029717e-19
ENSMUSG00000053333_Dis3l2	668.85	0.231931	0.104081	4.94365	0.0261866	0.0517122
ENSMUSG00000100768_Gm29055	1.75084	2.56543	1.60413	1.79482	0.180339	0.275051
ENSMUSG00000102383_Gm38142	5.51977	1.74695	0.877598	3.13846	0.076466	0.132761
ENSMUSG00000102649_Gm38021	1.89597	-1.68731	1.37255	0.984989	0.32097	0.438117
ENSMUSG00000084106_Gm6136	17.3158	0.4455	0.266833	2.78231	0.0953106	0.160402
ENSMUSG00000102571_Gm37967	0.802297	1.44525	1.88165	0.849462	0.356705	NA
ENSMUSG00000103984_Gm37447	2.67096	1.85871	1.20536	2.01947	0.155293	0.242802
ENSMUSG00000026247_Ecel1	5.53729	-2.13236	2.24339	-0.00921397	1	1
ENSMUSG00000036480_Prss56	1.5238	0.720994	2.49262	0.0565418	0.812048	0.881501
ENSMUSG00000026253_Chrng	2.70151	-0.401658	1.30504	0.0240393	0.876785	0.929447
ENSMUSG00000026254_Eif4e2	2834.66	0.0571754	0.0661749	0.744023	0.388375	0.507672
ENSMUSG00000026255_Efhd1	27.2681	5.38965	0.847067	28.6328	8.74893049923453e-08	3.83205555024745e-07
ENSMUSG00000048000_Gigyf2	873.976	-0.433495	0.126529	11.5585	0.000674399	0.00184421
ENSMUSG00000026288_Inpp5d	9507.54	0.822731	0.0894857	83.1081	7.76848169138808e-20	7.63581992711976e-19
ENSMUSG00000026289_Atg16l1	913.358	0.144794	0.115979	1.55247	0.212771	0.314991
ENSMUSG00000087968_Gm25395	3.27085	0.956674	0.908098	0.958745	0.327503	0.445038
ENSMUSG00000056055_Sag	14.7857	-0.380161	0.776243	0.154056	0.694689	0.787482
ENSMUSG00000070738_Dgkd	1882.46	-1.39651	0.103037	177.498	1.70507584770275e-40	3.83582027851158e-39
ENSMUSG00000101942_Gm19582	11.2006	-1.85849	0.461891	15.7725	7.1432458931781e-05	0.000225337
ENSMUSG00000103591_Gm38365	14.5576	-0.692239	0.40524	2.78513	0.0951429	0.160134
ENSMUSG00000005501_Usp40	221.572	0.465477	0.120235	14.9201	0.000112159	0.000343687
ENSMUSG00000090124_Ugt1a7c	777.587	0.436881	0.215558	3.85713	0.0495351	0.0909772
ENSMUSG00000054545_Ugt1a6a	7.52279	-0.608895	0.544619	1.1713	0.279134	0.392672
ENSMUSG00000081984_Dnajb3	9.85271	3.344	0.740746	17.1559	3.44334753146695e-05	0.000112818
ENSMUSG00000079429_Mroh2a	27.7324	0.0941327	0.450916	0.0412914	0.838976	0.901787
ENSMUSG00000044783_Hjurp	1219.73	0.0269538	0.183259	0.0214278	0.88362	0.934331
ENSMUSG00000062310_Glrp1	1.47067	-0.844329	1.89158	0.237253	0.626197	0.730811
ENSMUSG00000100798_Gm19589	4.08841	-0.0504555	1.22044	0.00142155	0.969924	0.992713
ENSMUSG00000104057_Gm38130	3.79104	-0.0108119	1.50608	-0.656673	1	1
ENSMUSG00000100367_Gm29336	19.0666	-0.895072	0.371521	5.4892	0.0191343	0.0389742
ENSMUSG00000049866_Arl4c	1440.65	-0.217183	0.123521	3.06036	0.080224	0.138427
ENSMUSG00000036206_Sh3bp4	1234.26	1.44291	0.206338	45.3718	1.62964142472716e-11	9.73973719605409e-11
ENSMUSG00000055013_Agap1	287.98	0.392441	0.177625	4.72027	0.029809	0.0579344
ENSMUSG00000104114_Gm37297	3.70797	-0.939119	1.15756	0.941246	0.331958	0.449751
ENSMUSG00000102009_4933400F21Rik	1.23319	-0.543074	1.85356	0.13196	0.716409	0.804323
ENSMUSG00000034486_Gbx2	1.38322	0.9652	2.99634	0.0695071	0.792056	0.866056
ENSMUSG00000092627_D130058E05Rik	1.71946	-0.874494	1.68576	0.401039	0.526553	0.640505
ENSMUSG00000044337_Ackr3	29.1287	-1.99319	1.0818	1.55064	0.213041	0.315293
ENSMUSG00000101028_Gm28723	0.691977	-1.31969	3.03223	0.0933514	0.759959	NA
ENSMUSG00000034432_Cops8	1703.18	-0.0373529	0.0756623	0.242749	0.622228	0.727558
ENSMUSG00000048126_Col6a3	6.7403	-1.80116	1.45397	0.581768	0.44562	0.563404
ENSMUSG00000026303_Mlph	5.8815	-4.36912	1.42731	3.81025	0.0509399	0.0932624
ENSMUSG00000026305_Lrrfip1	12394.1	0.148123	0.101787	2.09637	0.14765	0.232672
ENSMUSG00000070732_Rbm44	13.7701	0.379351	0.69883	0.239082	0.62487	0.729934
ENSMUSG00000100018_Gm7776	5.45774	0.699467	0.621894	1.17417	0.278546	0.392018
ENSMUSG00000034353_Ramp1	1686.76	-0.497479	0.0413063	144.756	2.42804057481896e-33	4.24619103079881e-32
ENSMUSG00000034343_Ube2f	3268.09	0.761817	0.140984	28.2799	1.04980002096617e-07	4.56063395327709e-07
ENSMUSG00000083064_Gm7785	9.43859	-0.220058	0.468176	0.210091	0.646696	0.748142
ENSMUSG00000026307_Scly	273.917	0.10332	0.0922346	1.2529	0.263	0.374316
ENSMUSG00000026308_Klhl30	18.2769	-7.38542	0.935149	61.7869	3.82708658431547e-15	2.92829415415468e-14
ENSMUSG00000047443_Erfe	2.67482	0.261823	1.68702	-0.69566	1	1
ENSMUSG00000026309_Ilkap	1151.71	0.142157	0.0608526	5.45347	0.0195295	0.0397033
ENSMUSG00000067071_Hes6	520.947	0.323158	0.0793573	16.5351	4.77588497676787e-05	0.000153641
ENSMUSG00000055866_Per2	86.1492	-0.355946	0.315042	1.15371	0.282774	0.396715
ENSMUSG00000034292_Traf3ip1	43.9987	-0.194959	0.398478	0.206384	0.649616	0.750388
ENSMUSG00000026311_Asb1	269.27	-0.605991	0.14548	17.1135	3.52104726729529e-05	0.000115128
ENSMUSG00000026313_Hdac4	566.555	-0.274087	0.107264	6.51905	0.0106725	0.0231665
ENSMUSG00000026260_Ndufa10	1961.8	0.139843	0.0844994	2.72796	0.098605	0.165062
ENSMUSG00000073616_Cops9	1375.32	0.449012	0.13051	11.6579	0.000639294	0.001757
ENSMUSG00000044055_Otos	3.3376	-1.68797	1.36634	1.4232	0.232877	0.339305
ENSMUSG00000034220_Gpc1	1169.7	-1.06085	0.191073	28.8605	7.77839133610983e-08	3.42181378790951e-07
ENSMUSG00000034212_Ankmy1	8.49605	2.2626	0.940001	5.2365	0.0221178	0.0444326
ENSMUSG00000047067_Dusp28	95.0074	-0.318136	0.204883	2.3505	0.125243	0.202543
ENSMUSG00000097251_5033417F24Rik	8.07718	-0.418969	0.691558	0.305439	0.580493	0.690493
ENSMUSG00000026269_Rnpepl1	1305.2	-0.113426	0.0810488	1.95193	0.162379	0.252295
ENSMUSG00000100632_9430060I03Rik	5.69995	1.21614	0.801485	1.63832	0.200556	0.299965
ENSMUSG00000026270_Capn10	227.56	-0.122277	0.132465	0.841195	0.359055	0.477984
ENSMUSG00000026271_Gpr35	5381.26	-0.291884	0.224108	1.584	0.208186	0.309479
ENSMUSG00000045091_Aqp12	1.26034	-0.893688	1.32273	0.54431	0.460652	0.578516
ENSMUSG00000014602_Kif1a	262.015	3.11954	0.501205	29.4138	5.84594184274508e-08	2.59193077260918e-07
ENSMUSG00000084989_Crocc2	1.04972	1.62749	3.01893	0.0759891	0.782808	0.858505
ENSMUSG00000047793_Sned1	57.176	1.74634	0.261473	42.4772	7.1509266441166e-11	4.07922056511258e-10
ENSMUSG00000026273_Mterf4	119.34	-0.101595	0.128205	0.62608	0.428797	0.547917
ENSMUSG00000026274_Pask	70.0031	1.12796	0.299596	13.1906	0.000281352	0.000815464
ENSMUSG00000026275_Ppp1r7	991.788	0.175619	0.104547	2.7944	0.0945941	0.159364
ENSMUSG00000034107_Ano7	4.99871	5.77521	0.97414	35.3413	2.7669542658107e-09	1.382899932537e-08
ENSMUSG00000034088_Hdlbp	4154.69	0.230332	0.0962304	5.72219	0.0167518	0.0345957
ENSMUSG00000026276_Sept2	12.356	-0.910615	0.441518	4.06885	0.0436809	0.0816334
ENSMUSG00000034066_Farp2	103.824	2.62248	0.359934	47.2284	6.31783317701228e-12	3.89620040230998e-11
ENSMUSG00000026277_Stk25	1601.2	0.0582753	0.108967	0.2842	0.593962	0.702769
ENSMUSG00000026278_Bok	15.7306	-0.270333	0.518631	0.262565	0.608364	0.715193
ENSMUSG00000026279_Thap4	204.315	1.18613	0.244771	21.9237	2.83702945551068e-06	1.05895508420201e-05
ENSMUSG00000026280_Atg4b	1182.08	-0.27155	0.0479271	32.0737	1.48430592854297e-08	6.94742166846961e-08
ENSMUSG00000026281_Dtymk	646.107	0.523526	0.0910316	32.8926	9.73915259872384e-09	4.63892489711083e-08
ENSMUSG00000026283_Ing5	808.326	-0.134165	0.117948	1.28018	0.257866	0.368514
ENSMUSG00000073609_D2hgdh	216.854	0.162747	0.115461	1.9827	0.159106	0.247954
ENSMUSG00000094651_Gal3st2	25.8753	0.83709	0.430972	3.25909	0.0710286	0.124636
ENSMUSG00000093805_Gm9994	7.00122	-0.0194473	0.517997	0.00132099	0.971007	0.99345
ENSMUSG00000073608_Gm6086	9.50768	-2.21415	0.558657	15.0161	0.000106599	0.000327905
ENSMUSG00000026285_Pdcd1	1033.66	-1.75889	0.249524	43.7963	3.64397747386757e-11	2.12163172058383e-10
ENSMUSG00000100347_Gm7895	0.794229	-0.305302	1.43047	0.0928302	0.76061	NA
ENSMUSG00000051185_Fam174a	2393.11	0.372393	0.131867	7.79438	0.00524091	0.0121643
ENSMUSG00000103973_BC055308	19.292	0.934004	0.462396	3.64422	0.0562642	0.101709
ENSMUSG00000081051_Gm15427	251.611	0.57428	0.21348	6.97425	0.00826909	0.0184017
ENSMUSG00000040710_St8sia4	4110.06	1.17159	0.0396389	856.289	3.12089474738683e-188	1.19636379246327e-185
ENSMUSG00000103197_Gm37642	24.837	1.63297	0.529367	8.53656	0.00348083	0.00839315
ENSMUSG00000040693_Slco4c1	15.1493	-4.89915	1.01609	14.0117	0.000181678	0.000539963
ENSMUSG00000097814_Panct2	9.78817	-6.46921	0.834341	75.3662	3.910331145645e-18	3.54537923692421e-17
ENSMUSG00000044757_Gm6430	2.33562	-0.132395	0.820609	0.023533	0.878079	0.930613
ENSMUSG00000044768_D1Ertd622e	1802.94	0.355833	0.110622	10.1944	0.0014087	0.00364873
ENSMUSG00000040648_Ppip5k2	1040.25	-0.0198289	0.0945862	0.0437245	0.834367	0.898545
ENSMUSG00000026333_Gin1	135.25	0.182793	0.176139	1.07002	0.30094	0.416461
ENSMUSG00000026335_Pam	72.175	-0.556527	0.161073	11.8822	0.000566723	0.00157016
ENSMUSG00000089782_Gm3531	19.9307	0.579712	0.247239	5.49273	0.0190957	0.0389162
ENSMUSG00000089706_B230216N24Rik	7.42938	-2.19809	0.666791	10.2648	0.00135594	0.00352398
ENSMUSG00000100182_1810006J02Rik	29.6746	-3.47954	0.420656	65.4128	6.07437332152899e-16	4.86127404817311e-15
ENSMUSG00000100711_Gm29461	4.11566	-2.7768	1.99966	0.225028	0.635235	0.738046
ENSMUSG00000100009_Gm7967	4.64146	0.907236	0.80184	1.13669	0.286352	0.40055
ENSMUSG00000099686_Gm29460	0.878126	-2.2295	3.02659	0.643765	0.422351	NA
ENSMUSG00000082431_Tdpx-ps1	5.1426	0.408117	0.504527	0.639483	0.423898	0.543069
ENSMUSG00000099835_Gm29668	0.805623	0.756583	1.71744	0.160515	0.688683	NA
ENSMUSG00000099375_Gm28187	1.44652	-1.47031	1.00426	2.14278	0.143242	0.226827
ENSMUSG00000050840_Cdh20	10.6414	-3.90476	1.03084	9.246	0.0023601	0.00589089
ENSMUSG00000047496_Rnf152	16.2562	-1.17874	0.747078	1.94788	0.162815	0.252912
ENSMUSG00000101214_Gm28403	0.739351	-2.83796	3.00776	-1.00578	1	NA
ENSMUSG00000067017_Gm3608	32.2209	-0.0368068	0.243891	0.0223644	0.881122	0.932601
ENSMUSG00000056536_Pign	395.57	-0.0831304	0.164885	0.249719	0.617273	0.723448
ENSMUSG00000026319_2310035C23Rik	823.791	0.169263	0.0619924	7.44349	0.00636664	0.0145342
ENSMUSG00000104044_Gm37566	2.54317	1.59592	2.7582	0.0066968	0.934779	0.970758
ENSMUSG00000101330_Gm10193	1.29389	-0.579758	1.06838	0.287551	0.591794	0.70095
ENSMUSG00000026321_Tnfrsf11a	968.641	0.819053	0.119166	46.1656	1.08667561595238e-11	6.57666925511821e-11
ENSMUSG00000099843_Gm7160	39.5465	-1.17478	0.268991	18.3188	1.86849211226212e-05	6.33753111232136e-05
ENSMUSG00000038866_Zcchc2	936.709	-1.15174	0.149969	56.2659	6.33025848660788e-14	4.47224712174026e-13
ENSMUSG00000101583_Gm20753	4.21152	0.930348	0.597268	2.34531	0.125661	0.203113
ENSMUSG00000044340_Phlpp1	699.893	1.42059	0.0788839	316.909	6.82687160623864e-71	3.81488769903137e-69
ENSMUSG00000103291_Gm38235	21.1565	2.24266	0.450651	22.9711	1.64459428363518e-06	6.29557392339437e-06
ENSMUSG00000100247_A530053M12Rik	3.66874	4.81972	1.5232	8.512	0.00352812	0.00849649
ENSMUSG00000057329_Bcl2	1056.73	-2.65601	0.142415	308.216	5.34462652100035e-69	2.78370805782646e-67
ENSMUSG00000054006_D630008O14Rik	2.69617	-2.79896	1.66865	0.634588	0.425677	0.544911
ENSMUSG00000009905_Kdsr	474.581	-1.31622	0.104885	154.09	2.21294533029002e-35	4.1100313125648e-34
ENSMUSG00000009907_Vps4b	3463.5	-0.034331	0.0799769	0.183728	0.668189	0.766071
ENSMUSG00000067001_Serpinb7	0.695327	2.69367	3.01705	1.20812	0.271706	NA
ENSMUSG00000062345_Serpinb2	1978.44	-4.16458	0.455594	62.6491	2.47022821832218e-15	1.90991788062046e-14
ENSMUSG00000092572_Serpinb10	90.3978	-0.581429	0.334043	2.77346	0.0958391	0.161178
ENSMUSG00000026315_Serpinb8	703.701	1.46055	0.510271	5.80521	0.0159787	0.0331635
ENSMUSG00000038702_Dsel	39.7544	1.25502	0.310256	15.9365	6.55025980703481e-05	0.000207388
ENSMUSG00000026374_Tsn	2182.81	0.0233253	0.0433515	0.289295	0.590672	0.699976
ENSMUSG00000026377_Nifk	1199.28	-0.0978423	0.0775814	1.58318	0.208303	0.309619
ENSMUSG00000064302_Clasp1	982.948	0.97115	0.109759	76.2736	2.4696375904941e-18	2.2583751763836e-17
ENSMUSG00000107722_2900060B14Rik	10.2139	-1.43146	0.433622	10.5686	0.00115027	0.00302846
ENSMUSG00000026380_Tfcp2l1	2.4774	-3.08731	2.01936	2.20084	0.137936	0.219718
ENSMUSG00000048402_Gli2	2.04574	-2.35123	3.0031	0.474427	0.490958	0.607618
ENSMUSG00000037035_Inhbb	5.58927	0.47154	1.5306	0.148836	0.69965	0.791068
ENSMUSG00000004451_Ralb	2484.49	0.387548	0.168057	5.12142	0.0236322	0.0471243
ENSMUSG00000098447_Gm27184	2.12401	-1.58763	1.11894	1.49116	0.222036	0.326293
ENSMUSG00000098923_Tmem185b	1038.44	-0.339068	0.106821	9.96985	0.00159124	0.00408401
ENSMUSG00000101731_3830432H09Rik	0.830959	2.52764	3.02214	0.894973	0.344133	NA
ENSMUSG00000026383_Epb41l5	57.6562	-4.20028	0.840761	12.8607	0.000335554	0.000961369
ENSMUSG00000026384_Ptpn4	186.621	-0.344681	0.225716	2.24632	0.133933	0.2143
ENSMUSG00000103146_Gm37745	1.72761	2.23771	1.4354	1.99435	0.157887	0.246295
ENSMUSG00000036975_Tmem177	53.6032	-0.572906	0.301462	3.5112	0.0609552	0.109128
ENSMUSG00000050777_Tmem37	119.2	-3.61071	0.301336	128.1	1.06711618978832e-29	1.64284465941147e-28
ENSMUSG00000026385_Dbi	2330.85	-0.0188246	0.177686	0.010878	0.916933	0.958803
ENSMUSG00000026388_3110009E18Rik	42.1684	-0.852482	0.230177	13.5789	0.000228748	0.00067194
ENSMUSG00000026389_Steap3	68.5158	-2.46287	0.219867	125.055	4.95080542356636e-29	7.40765710800129e-28
ENSMUSG00000026390_Marco	229.859	-0.549866	0.150026	13.369	0.000255822	0.000746437
ENSMUSG00000003721_Insig2	530.855	0.626163	0.123715	25.1539	5.29335935802584e-07	2.13775429446442e-06
ENSMUSG00000104253_Gm37174	8.05299	3.34532	1.58732	0.7656	0.381582	0.500738
ENSMUSG00000026339_Ccdc93	338.682	0.356502	0.146706	5.77686	0.0162386	0.0336481
ENSMUSG00000001674_Ddx18	766.529	0.184539	0.0522397	12.4688	0.000413808	0.00116811
ENSMUSG00000036815_Dpp10	58.6727	1.46998	0.194442	56.7133	5.04225437250686e-14	3.59541999843151e-13
ENSMUSG00000102902_Gm38263	0.769887	-2.30165	1.79439	2.27223	0.13171	NA
ENSMUSG00000026341_Actr3	32062.9	0.622722	0.0971773	40.3358	2.13854226621874e-10	1.17380984010924e-09
ENSMUSG00000102063_Gm28706	1.02379	1.56311	2.13956	0.689198	0.406437	0.526089
ENSMUSG00000026342_Slc35f5	473.004	-0.561506	0.16991	10.5614	0.00115471	0.0030389
ENSMUSG00000049690_Nckap5	4.65732	-3.42998	2.26697	1.57617	0.209313	0.310759
ENSMUSG00000036155_Mgat5	489.54	-2.40367	0.130115	315.127	1.66828610443501e-70	9.21499705005934e-69
ENSMUSG00000104378_Gm37510	7.46574	-1.3258	1.07223	1.15763	0.281957	0.395744
ENSMUSG00000099471_Gm8451	30.489	0.534464	0.335314	2.42006	0.11979	0.194925
ENSMUSG00000026347_Tmem163	66.433	-5.30005	0.571279	65.1192	7.05022199985018e-16	5.62813848692746e-15
ENSMUSG00000026349_Ccnt2	1263.07	0.241947	0.0659499	13.4359	0.000246858	0.00072182
ENSMUSG00000051590_Map3k19	3.20482	-0.368103	1.77631	0.00884248	0.925082	0.963987
ENSMUSG00000036104_Rab3gap1	900.762	-0.549766	0.130736	17.2886	3.21105622616786e-05	0.000105713
ENSMUSG00000036086_Zranb3	159.765	2.01896	0.216171	82.3718	1.12753815717255e-19	1.09982309712602e-18
ENSMUSG00000099760_Gm28800	1.38812	3.55237	1.18456	9.23623	0.00237272	0.0059193
ENSMUSG00000104164_Gm38248	16.6367	1.43695	0.715759	2.82245	0.0929544	0.156974
ENSMUSG00000058603_Rpl28-ps1	59.2096	0.794586	0.268536	8.42414	0.00370271	0.00887568
ENSMUSG00000056211_R3hdm1	688.748	0.33147	0.17119	3.6567	0.0558441	0.101054
ENSMUSG00000103497_Gm37407	4.5155	-2.17789	0.878639	4.55248	0.0328711	0.0632126
ENSMUSG00000026353_Ubxn4	2954.99	0.0444439	0.0544289	0.665965	0.414462	0.533799
ENSMUSG00000026354_Lct	0.739198	1.51708	3.02592	0.235282	0.627635	NA
ENSMUSG00000026355_Mcm6	3113.73	0.833603	0.157982	26.7449	2.32159579292489e-07	9.76905083710019e-07
ENSMUSG00000026356_Dars	2820.99	0.400199	0.0956427	17.3086	3.17748826637386e-05	0.000104626
ENSMUSG00000100078_Gm6170	12.15	0.338708	0.380822	0.766433	0.381323	0.500501
ENSMUSG00000045382_Cxcr4	1745.09	-1.32959	0.150576	74.6917	5.50258957502385e-18	4.95155560490526e-17
ENSMUSG00000042581_Thsd7b	43.0955	-8.33264	0.758641	283.294	1.43799931504031e-63	6.45483205418678e-62
ENSMUSG00000086633_Gm16081	0.804611	-2.73079	2.04152	2.31927	0.12778	NA
ENSMUSG00000086825_Gm15675	1.59001	-3.84797	1.25435	9.89687	0.0016556	0.00423897
ENSMUSG00000026399_Cd55	234.637	-2.60282	0.17031	219.842	9.7922757215871e-50	3.00301678009056e-48
ENSMUSG00000026409_Pfkfb2	30.4726	-1.97212	0.656759	7.43872	0.00638352	0.0145658
ENSMUSG00000046404_Yod1	213.454	-0.884198	0.171332	26.1457	3.16593884522001e-07	1.31005073070665e-06
ENSMUSG00000042510_AA986860	5.41354	-1.96808	0.819011	4.32911	0.0374659	0.0710225
ENSMUSG00000026415_Fcamr	7.22578	0.149924	0.861151	0.0294177	0.863818	0.919658
ENSMUSG00000086706_Gm15848	4.2581	1.13222	0.844866	1.54663	0.213634	0.316028
ENSMUSG00000026417_Pigr	2.28516	1.0452	2.44059	0.1237	0.725055	0.811322
ENSMUSG00000042474_Fcmr	47.9042	0.391823	0.275474	1.97185	0.160252	0.249557
ENSMUSG00000016529_Il10	88.4897	-0.594185	0.232426	6.4194	0.011288	0.024365
ENSMUSG00000016528_Mapkapk2	15172.9	-0.424837	0.116784	12.9792	0.000314976	0.000905119
ENSMUSG00000102856_Gm37084	14.8034	-1.95752	0.490101	14.8945	0.000113697	0.00034812
ENSMUSG00000016526_Dyrk3	191.013	0.912441	0.155765	33.6015	6.76397218077519e-09	3.27303849504969e-08
ENSMUSG00000026427_Eif2d	717.532	0.375968	0.0942868	15.7746	7.13552286467227e-05	0.00022513
ENSMUSG00000026430_Rassf5	5316.55	0.176287	0.0920719	3.64673	0.0561792	0.101603
ENSMUSG00000042349_Ikbke	675.507	-3.47562	0.260351	146.544	9.87075655622224e-34	1.75666472528423e-32
ENSMUSG00000102055_Gm28913	1.68013	-3.06568	1.41855	4.48866	0.0341204	0.0654052
ENSMUSG00000026425_Srgap2	1719.6	-0.390167	0.101461	14.5981	0.000133049	0.000403824
ENSMUSG00000104060_Gm37954	4.4911	-0.683436	0.614198	1.20814	0.2717	0.384047
ENSMUSG00000101778_Gm29488	1.79563	0.839942	2.14523	0.191804	0.66142	0.760676
ENSMUSG00000055184_Fam72a	38.4703	0.354636	0.216304	2.65396	0.103293	0.171673
ENSMUSG00000004552_Ctse	382.364	-1.07028	0.117913	81.0341	2.21856472767386e-19	2.13362920899774e-18
ENSMUSG00000052688_Rab7b	12905.5	3.29027	0.420148	44.513	2.526739254713e-11	1.49337068439976e-10
ENSMUSG00000042268_Slc26a9	8.71945	0.706019	1.12807	0.113362	0.736349	0.820701
ENSMUSG00000042251_Pm20d1	0.729103	1.7583	3.03038	0.379687	0.537771	NA
ENSMUSG00000013275_Slc41a1	3031.94	1.57769	0.112444	187.322	1.22151075521744e-42	3.00934404180625e-41
ENSMUSG00000026433_Rab29	810.604	0.174044	0.162158	1.12193	0.289503	0.403821
ENSMUSG00000026434_Nucks1	1438.71	0.439082	0.0744543	34.5506	4.15314166289855e-09	2.04425439786278e-08
ENSMUSG00000026435_Slc45a3	136.023	-3.60363	0.332722	97.5057	5.37027271205157e-23	6.13786625354158e-22
ENSMUSG00000026436_Elk4	584.061	-0.562015	0.13828	16.2587	5.52565119139594e-05	0.000176429
ENSMUSG00000059149_Mfsd4a	165.119	-0.21418	0.175047	1.46304	0.226447	0.331726
ENSMUSG00000026437_Cdk18	34.27	-0.410824	0.2966	1.81972	0.177347	0.271379
ENSMUSG00000089808_Gm7241	1.00588	3.08595	1.47779	4.65941	0.0308838	NA
ENSMUSG00000042115_Klhdc8a	8.66206	-1.54637	0.919573	1.72923	0.18851	0.285062
ENSMUSG00000009772_Nuak2	6568.95	1.24152	0.161872	55.3299	1.01908464705582e-13	7.08994389478003e-13
ENSMUSG00000100658_F730311O21Rik	6.8762	-0.0277876	0.622436	0.00192973	0.964961	0.989869
ENSMUSG00000042066_Tmcc2	124.92	0.863168	0.239447	12.525	0.000401546	0.001136
ENSMUSG00000042046_Dstyk	326.844	-0.521082	0.13333	15.092	0.000102395	0.00031548
ENSMUSG00000097760_6030442K20Rik	1.49683	0.12315	1.28872	0.00473587	0.945135	0.977314
ENSMUSG00000026439_Rbbp5	615.113	-0.29453	0.0555945	28.0673	1.17169984135218e-07	5.07754258629825e-07
ENSMUSG00000048174_Tmem81	24.1125	-1.17501	0.358673	10.0959	0.00148601	0.00383498
ENSMUSG00000026442_Nfasc	0.749147	0.0473273	2.19305	0.000103357	0.991888	NA
ENSMUSG00000026443_Lrrn2	43.7352	-8.02439	0.753048	309.745	2.48161135620802e-69	1.31033181444736e-67
ENSMUSG00000054387_Mdm4	962.728	-0.153606	0.0872702	3.08563	0.0789869	0.136603
ENSMUSG00000100228_Gm29257	1.03264	0.671785	1.42697	0.168489	0.681459	0.777345
ENSMUSG00000026447_Pik3c2b	17.1104	0.697032	1.11242	0.215769	0.642283	0.74443
ENSMUSG00000102425_Gm26616	26.5617	1.35846	0.237568	33.0387	9.03433602756287e-09	4.31930951958836e-08
ENSMUSG00000046062_Ppp1r15b	3452.94	-0.0135923	0.0898929	0.0227134	0.880205	0.932196
ENSMUSG00000041757_Plekha6	17.1365	-1.66318	1.04794	1.93962	0.16371	0.254117
ENSMUSG00000070644_Etnk2	61.3171	0.742117	0.195852	14.2414	0.000160796	0.000481861
ENSMUSG00000070643_Sox13	46.7427	-5.96489	1.42843	7.5454	0.00601634	0.0138069
ENSMUSG00000090553_Snrpe	1591.12	0.409442	0.114556	12.6606	0.000373433	0.0010618
ENSMUSG00000102976_Zc3h11a	207.202	-0.470497	0.0917591	26.292	2.93508063970908e-07	1.21873246579948e-06
ENSMUSG00000094410_Gm38394	6.39829	0.678287	0.513361	1.65391	0.198428	0.297432
ENSMUSG00000051998_Lax1	558.209	-4.27757	0.206032	345.997	3.15440175611375e-77	2.04950571048923e-75
ENSMUSG00000026463_Atp2b4	136.144	-2.06162	0.333288	32.9944	9.24231615989539e-09	4.41139273476549e-08
ENSMUSG00000102509_Gm37368	2.35148	-3.69946	1.16292	9.74232	0.00180073	0.00458422
ENSMUSG00000041577_Prelp	3.64781	0.532703	2.79606	0.0162355	0.898609	0.94578
ENSMUSG00000041559_Fmod	3.29592	0.986498	1.33103	0.390422	0.532077	0.645791
ENSMUSG00000020423_Btg2	43828.4	0.112393	0.115357	0.93985	0.332316	0.450078
ENSMUSG00000102380_Gm38140	2.32303	3.22318	1.45714	3.87098	0.049128	0.0903594
ENSMUSG00000026450_Chit1	3.54238	-2.43288	1.81752	0.449476	0.502584	0.6184
ENSMUSG00000064246_Chil1	12.7838	-3.9587	1.3162	7.42784	0.00642225	0.0146472
ENSMUSG00000026458_Ppfia4	1512.1	1.43708	0.207864	43.9761	3.32405189101416e-11	1.94303454086821e-10
ENSMUSG00000042305_Tmem183a	1440.95	-0.158477	0.0635235	6.21488	0.0126681	0.0270235
ENSMUSG00000026456_Cyb5r1	1293.87	1.32359	0.19233	43.8474	3.55010640092804e-11	2.06949176966508e-10
ENSMUSG00000026457_Adipor1	4635.9	-0.477559	0.0679696	49.0216	2.53162176745267e-12	1.60355566479727e-11
ENSMUSG00000102722_Gm37935	1.16924	-3.52906	2.99319	1.77871	0.182308	0.277546
ENSMUSG00000026455_Klhl12	230.427	-2.95193	0.145621	394.916	7.04209992096646e-88	5.84311381753957e-86
ENSMUSG00000042229_Rabif	669.517	-0.894017	0.154806	32.4671	1.21225957179023e-08	5.72018198239865e-08
ENSMUSG00000042207_Kdm5b	473.908	-1.70937	0.201329	65.9984	4.51290673574369e-16	3.63593456931481e-15
ENSMUSG00000073557_Ppp1r12b	172.608	2.06862	0.236401	69.2089	8.85689629781851e-17	7.4363755706862e-16
ENSMUSG00000103614_Gm37949	1.58317	-1.54243	2.14031	-0.736047	1	1
ENSMUSG00000103976_Gm37677	1.00245	0.195381	1.97686	0.016185	0.898766	NA
ENSMUSG00000026429_Ube2t	174.468	1.30527	0.18256	48.7991	2.83568452066488e-12	1.78964653301231e-11
ENSMUSG00000097993_Ptprv	265.735	-3.33102	0.303114	101.844	6.00761814053214e-24	7.20575825404127e-23
ENSMUSG00000031506_Ptpn7	1408	-1.70406	0.0948255	306.948	1.00959579028409e-68	5.16024600330006e-67
ENSMUSG00000026426_Arl8a	2442.49	-0.0358508	0.119467	0.0888425	0.765654	0.844135
ENSMUSG00000087721_Gm26280	2.26796	-1.95854	0.85742	5.19221	0.0226883	0.0454823
ENSMUSG00000085311_Gm15445	10.8451	-1.86292	0.504602	13.4591	0.000243819	0.000713041
ENSMUSG00000079139_Gm4204	97.9583	1.52172	0.149565	102.74	3.82130018641601e-24	4.61517710605139e-23
ENSMUSG00000097680_Gm26642	1.95441	-2.03993	1.71261	1.38049	0.240018	0.347621
ENSMUSG00000003051_Elf3	1.64508	-2.76388	2.79875	0.921494	0.337083	0.454991
ENSMUSG00000041926_Rnpep	2489.74	-0.378636	0.172836	4.60341	0.0319084	0.0615837
ENSMUSG00000062580_Timm17a	1125.95	0.141592	0.0530132	7.12311	0.00760965	0.0170709
ENSMUSG00000041889_Shisa4	2.91897	-0.830749	1.2687	0.634507	0.425707	0.544913
ENSMUSG00000041879_Ipo9	1113.47	-0.0244058	0.12455	0.0381745	0.845093	0.905467
ENSMUSG00000009418_Nav1	1745.68	1.78654	0.153613	124.837	5.52423768484507e-29	8.23351972826014e-28
ENSMUSG00000102474_2610012C04Rik	1.21856	1.78632	2.61866	-0.934272	1	1
ENSMUSG00000104524_Gm37333	6.78134	0.694478	0.728814	0.773743	0.379062	0.498282
ENSMUSG00000054412_Gm4793	3.99624	-5.04413	1.63627	8.38009	0.00379354	0.00907071
ENSMUSG00000026421_Csrp1	4187.22	0.853931	0.0407038	435.128	1.24397150431567e-96	1.22903102181538e-94
ENSMUSG00000041801_Phlda3	44.4112	0.0379971	0.390745	0.00824629	0.927644	0.965473
ENSMUSG00000026418_Tnni1	13.4652	-1.6749	0.516289	10.1911	0.0014112	0.0036547
ENSMUSG00000041782_Lad1	1311.95	1.89825	0.197892	83.0311	8.07738082866462e-20	7.92724825105042e-19
ENSMUSG00000026414_Tnnt2	7.15341	2.59409	1.43071	1.23111	0.267191	0.379099
ENSMUSG00000026413_Pkp1	2.33867	-1.35695	2.18273	-0.517512	1	1
ENSMUSG00000051985_Igfn1	1.67617	-2.42489	3.00864	0.566174	0.451783	0.56958
ENSMUSG00000026411_Tmem9	149.331	-1.53749	0.29474	24.3075	8.21178699536263e-07	3.24995501424975e-06
ENSMUSG00000102717_Gm37759	45.6847	4.19544	0.386742	111.299	5.0875512989127e-26	6.68355693942835e-25
ENSMUSG00000041642_Kif21b	571.41	0.171873	0.198688	0.727309	0.393757	0.513411
ENSMUSG00000041605_5730559C18Rik	4.32487	-0.119289	1.73834	0.000535681	0.981535	0.999685
ENSMUSG00000102941_Gm37552	5.25656	-4.99749	0.877615	39.3548	3.53382306059997e-10	1.9042110374619e-09
ENSMUSG00000097433_Gm26781	4.94464	-2.07354	0.638675	10.5187	0.00118174	0.00310323
ENSMUSG00000052759_Gpr25	1.7603	-3.75685	1.27762	8.68873	0.00320184	0.00777422
ENSMUSG00000041570_Camsap2	395.028	0.462888	0.138481	11.0236	0.000899583	0.00241183
ENSMUSG00000097403_9230116N13Rik	18.173	-0.383978	0.648105	0.303439	0.581734	0.691479
ENSMUSG00000026404_Ddx59	149.779	-0.380941	0.0905608	17.7209	2.55797932209243e-05	8.51342067486466e-05
ENSMUSG00000041498_Kif14	21.3544	1.50031	1.16121	0.616176	0.432472	0.551143
ENSMUSG00000104509_Gm33994	1.98705	-0.745249	1.11626	0.436951	0.508598	0.623931
ENSMUSG00000041483_Zfp281	937.411	0.0158983	0.0696438	0.0520951	0.819457	0.886874
ENSMUSG00000097113_Gm19705	4.61912	-2.15407	0.781342	6.7566	0.00934017	0.0205679
ENSMUSG00000026398_Nr5a2	0.741528	1.30079	3.02668	0.1676	0.682254	NA
ENSMUSG00000098243_Gm4258	4.18164	-2.26536	0.750418	9.18864	0.00243522	0.00606023
ENSMUSG00000103038_Gm37124	1.13502	-2.38503	1.93031	1.39162	0.238131	0.345358
ENSMUSG00000102142_Gm26930	1.16971	0.552439	1.44878	0.110211	0.739904	0.823275
ENSMUSG00000103427_Gm37534	2.43387	-3.53867	1.97025	2.71033	0.0997004	0.16659
ENSMUSG00000026395_Ptprc	35964.7	-0.686929	0.0860113	62.8243	2.25992701143941e-15	1.75014226376805e-14
ENSMUSG00000104291_A130071D04Rik	93.3484	-0.306288	0.328545	0.7703	0.380124	0.499338
ENSMUSG00000026394_Atp6v1g3	2.20859	-4.44751	1.09164	16.9301	3.87817144683304e-05	0.000125945
ENSMUSG00000026393_Nek7	2827.09	-0.105072	0.0984984	1.13212	0.287324	0.401424
ENSMUSG00000102448_Gm37101	3.01633	-4.67318	1.61311	7.65147	0.0056726	0.0130744
ENSMUSG00000079283_2310009B15Rik	125.293	0.474694	0.217714	4.59497	0.032066	0.0618568
ENSMUSG00000102365_Gm37045	1.76243	-1.82045	1.35518	1.13758	0.286164	0.400417
ENSMUSG00000056268_Dennd1b	1132.78	0.182283	0.0507657	12.8744	0.000333102	0.000954772
ENSMUSG00000104436_Gm37423	3.58751	2.9107	0.885305	10.8271	0.00100028	0.00266178
ENSMUSG00000104900_4930596I21Rik	4.15419	-0.0489963	0.523486	0.00861588	0.926045	0.964437
ENSMUSG00000085361_Gm16305	0.652655	0.510746	2.88755	0.000409544	0.983854	NA
ENSMUSG00000102157_Gm37470	3.20253	-0.598444	2.04244	0.0133449	0.908033	0.952159
ENSMUSG00000105936_Gm43544	0.804825	-0.10868	1.98705	-0.494139	1	NA
ENSMUSG00000102451_Gm37655	1.49744	-0.734005	1.92725	0.1626	0.686774	0.781515
ENSMUSG00000102243_Gm37718	13.36	0.653016	0.70337	0.760063	0.383309	0.502523
ENSMUSG00000033964_Zbtb41	296.864	-0.206558	0.1956	1.10788	0.292543	0.407498
ENSMUSG00000033952_Aspm	83.7645	1.67464	0.350725	20.9816	4.63708070997199e-06	1.69396955272245e-05
ENSMUSG00000104496_Gm5837	1.31277	0.337392	1.23414	0.074579	0.784783	0.860004
ENSMUSG00000026365_Cfh	525.634	-0.680551	0.343455	3.29747	0.0693866	0.122158
ENSMUSG00000101795_Gm5835	21.6624	0.532741	0.251408	4.48747	0.0341442	0.0654377
ENSMUSG00000026361_Cdc73	983.637	-0.256548	0.106012	5.8372	0.0156908	0.0326471
ENSMUSG00000033849_B3galt2	95.8678	-6.78156	0.722449	64.3317	1.05138751916616e-15	8.2895699629197e-15
ENSMUSG00000018196_Glrx2	620.241	0.214939	0.125026	2.93288	0.0867927	0.148069
ENSMUSG00000018199_Trove2	84.146	-0.726948	0.288861	5.97935	0.0144743	0.0303899
ENSMUSG00000018189_Uchl5	1203.07	0.423269	0.053725	61.9176	3.58131280095185e-15	2.7468196260842e-14
ENSMUSG00000100455_Gm29170	37.6899	0.233078	0.243055	0.917012	0.338261	0.456291
ENSMUSG00000026360_Rgs2	22661.8	-0.146043	0.0614088	5.63504	0.0176049	0.0361743
ENSMUSG00000051079_Rgs13	23.2222	-6.41047	0.74279	88.6604	4.68758235090152e-21	4.88829656799398e-20
ENSMUSG00000026358_Rgs1	14084.1	0.11735	0.0797348	2.1562	0.141996	0.225211
ENSMUSG00000100441_Gm7266	1.30906	0.663439	1.14379	0.343266	0.55795	0.670065
ENSMUSG00000026357_Rgs18	739.044	0.658236	0.106662	37.7196	8.16791858679178e-10	4.28564181639852e-09
ENSMUSG00000035131_Brinp3	2.34476	-3.43787	2.0171	2.38436	0.122555	0.198833
ENSMUSG00000056220_Pla2g4a	789.401	-1.0154	0.216921	20.6043	5.64691904231429e-06	2.04062023537025e-05
ENSMUSG00000097028_Ptgs2os	9.29014	0.0628254	0.492833	0.0160974	0.899039	0.946075
ENSMUSG00000032487_Ptgs2	11434.5	-0.151101	0.238072	0.378892	0.538197	0.651411
ENSMUSG00000101199_Gm9687	2.7558	0.205391	1.50734	0.0391262	0.843199	0.904279
ENSMUSG00000097754_Ptgs2os2	54.4452	1.45286	0.40596	11.2762	0.000785091	0.0021248
ENSMUSG00000099875_Gm15453	4.60959	0.290356	0.584054	0.245568	0.620213	0.725918
ENSMUSG00000006010_BC003331	598.268	-0.378438	0.111856	11.3712	0.000745935	0.00202598
ENSMUSG00000006005_Tpr	3796.47	-0.147363	0.0518327	8.0707	0.00449868	0.0106007
ENSMUSG00000006014_Prg4	8.65753	-0.584672	0.787935	0.397478	0.528395	0.64246
ENSMUSG00000066842_Hmcn1	0.792393	-2.52269	2.83084	1.07422	0.299994	NA
ENSMUSG00000114212_	6.18802	-0.601475	1.21451	0.239039	0.624901	0.729934
ENSMUSG00000100954_Gm10138	25.5407	0.511361	0.249796	4.16268	0.0413239	0.077683
ENSMUSG00000023150_Ivns1abp	11624.5	-0.0429887	0.14955	0.0810732	0.775848	0.852726
ENSMUSG00000052748_Swt1	560.093	-0.302859	0.0893095	11.4549	0.000713044	0.0019427
ENSMUSG00000053286_Trmt1l	794.65	0.163358	0.11816	1.89775	0.16833	0.260066
ENSMUSG00000106406_Mir7682	1.55064	-0.227661	1.05377	0.0401882	0.841113	0.903441
ENSMUSG00000103928_Gm37893	14.215	0.939742	1.09538	0.433907	0.510078	0.62512
ENSMUSG00000026484_Rnf2	1620.85	-0.897312	0.0737558	145.723	1.49256750277159e-33	2.6342579489524e-32
ENSMUSG00000103238_Gm36527	1.2836	-1.89226	1.33027	1.90754	0.167237	0.258698
ENSMUSG00000026483_Fam129a	5994.78	0.602306	0.0780551	59.0425	1.54300860448732e-14	1.13096925132729e-13
ENSMUSG00000100594_2810414N06Rik	10.2751	-2.42014	0.824567	6.59187	0.0102445	0.0223285
ENSMUSG00000043019_Edem3	501.797	-0.566467	0.156021	13.0175	0.0003086	0.00088853
ENSMUSG00000032666_1700025G04Rik	1496.15	1.15906	0.0944712	146.066	1.25563988624786e-33	2.22429294821744e-32
ENSMUSG00000014980_Tsen15	196.292	-0.279008	0.185494	2.20985	0.137132	0.218579
ENSMUSG00000032649_Colgalt2	203.601	-6.17934	0.607533	67.3135	2.31592885695636e-16	1.89941841682852e-15
ENSMUSG00000026482_Rgl1	1991.79	-0.882126	0.246668	11.7324	0.000614216	0.00169196
ENSMUSG00000080950_Gm7278	11.4291	-0.801891	0.408727	3.73892	0.0531587	0.0967243
ENSMUSG00000008475_Arpc5	24020.1	0.282907	0.0752063	14.0555	0.000177495	0.000528515
ENSMUSG00000026480_Ncf2	4060.33	-2.0722	0.118357	282.046	2.68953130090843e-63	1.19329274177111e-61
ENSMUSG00000042772_Smg7	1623.89	-0.0944712	0.0750568	1.58131	0.208573	0.309972
ENSMUSG00000100394_Gm28791	10.1336	-1.02769	0.694059	1.68079	0.19482	0.293174
ENSMUSG00000042751_Nmnat2	11.3893	-4.89874	0.739153	51.3434	7.75410889618014e-13	5.11083236633717e-12
ENSMUSG00000026479_Lamc2	4.25319	-1.16418	1.57643	-0.202143	1	1
ENSMUSG00000026478_Lamc1	191.43	-2.47129	0.357049	40.8366	1.65506807243926e-10	9.17636382541028e-10
ENSMUSG00000079138_Gm8818	91.7964	-4.36589	0.347813	142.22	8.70699974606067e-33	1.48476035705289e-31
ENSMUSG00000073538_E330020D12Rik	59.8209	2.44391	0.378956	36.7323	1.3551652752411e-09	6.96366027628584e-09
ENSMUSG00000042708_Shcbp1l	11.7677	-0.182361	0.445722	0.155382	0.693445	0.786388
ENSMUSG00000042699_Dhx9	420.581	-0.292887	0.151597	3.69715	0.0545056	0.098884
ENSMUSG00000042684_Npl	170.845	-1.81477	0.150026	142.638	7.0515825009643e-33	1.20784344768528e-31
ENSMUSG00000042671_Rgs8	1.00762	-1.48429	3.02385	0.100539	0.751184	NA
ENSMUSG00000026475_Rgs16	170.679	-2.8571	0.20317	182.793	1.19019659157973e-41	2.79564927338341e-40
ENSMUSG00000066800_Rnasel	311.317	-2.93562	0.258155	110.085	9.38865337191405e-26	1.22001572325069e-24
ENSMUSG00000042641_Rgsl1	5.01653	-5.45345	1.68916	9.01755	0.002674	0.00659197
ENSMUSG00000045968_Teddm2	3.18336	-2.2767	0.914224	6.04115	0.0139762	0.0294699
ENSMUSG00000026473_Glul	519.788	-1.17057	0.0809587	206.428	8.26594120006953e-47	2.3471599256553e-45
ENSMUSG00000101903_Gm29291	0.885088	1.42548	1.89333	0.745906	0.387775	NA
ENSMUSG00000100627_A830008E24Rik	3.76302	0.179601	1.19381	0.00851436	0.926481	0.964682
ENSMUSG00000004110_Cacna1e	122.801	6.93443	0.507533	179.546	6.09033786131197e-41	1.39134095098649e-39
ENSMUSG00000101880_Gm29282	1.96043	1.42364	1.2826	0.861601	0.353291	0.472279
ENSMUSG00000096950_Gm9530	223.1	4.61761	0.414266	92.2242	7.73922005710006e-22	8.41393254874854e-21
ENSMUSG00000056708_Ier5	14626.5	0.618979	0.0538826	130.854	2.66458809384782e-30	4.16915591794133e-29
ENSMUSG00000026471_Mr1	107.152	-1.89773	0.245484	55.7664	8.16131289912643e-14	5.72786101565567e-13
ENSMUSG00000026470_Stx6	2766.64	-0.0503249	0.0668076	0.566737	0.451559	0.569372
ENSMUSG00000104181_Gm8850	3.84307	-1.00134	0.736785	1.68384	0.194415	0.292723
ENSMUSG00000033722_BC034090	2.86886	0.82329	1.95327	0.0300668	0.862339	0.918502
ENSMUSG00000026469_Xpr1	708.714	-0.241481	0.185749	1.66154	0.197395	0.296301
ENSMUSG00000033701_Acbd6	622.161	0.263819	0.128752	4.13905	0.0419047	0.0786667
ENSMUSG00000033684_Qsox1	625.029	-0.636523	0.196459	10.0861	0.00149389	0.00385324
ENSMUSG00000033671_Cep350	826.368	0.116161	0.107061	1.16398	0.280642	0.394391
ENSMUSG00000102837_Gm37383	0.776659	1.70257	2.67515	0.419621	0.517126	NA
ENSMUSG00000102833_Gm9694	2.13209	0.51577	1.09858	0.195615	0.658284	0.757934
ENSMUSG00000026466_Tor1aip1	3354.97	-0.600645	0.0741405	65.0515	7.29643969481318e-16	5.81258768206502e-15
ENSMUSG00000102964_9430034N14Rik	30.3279	-1.10119	0.347944	9.31512	0.00227271	0.00569722
ENSMUSG00000050565_Tor1aip2	3682.07	-0.0568298	0.0792404	0.513264	0.473729	0.591799
ENSMUSG00000060985_Tdrd5	7.34874	-5.86998	0.919822	43.1986	4.94568045739273e-11	2.84666238218758e-10
ENSMUSG00000026602_Nphs2	3.00867	-4.53723	1.15774	14.9121	0.000112639	0.00034499
ENSMUSG00000078193_Gm2000	239.661	0.404125	0.15977	6.29616	0.0121	0.0259303
ENSMUSG00000026600_Soat1	2958.34	0.0263085	0.120211	0.0471427	0.828112	0.893365
ENSMUSG00000103199_Gm37648	3.58194	-2.33091	1.49171	0.493386	0.482421	0.59953
ENSMUSG00000101523_Gm10031	3.14959	-0.275689	0.693046	0.150919	0.697659	0.789609
ENSMUSG00000026596_Abl2	196.185	-0.355161	0.201687	2.97809	0.084399	0.144448
ENSMUSG00000104293_Gm38043	4.38306	-2.66769	1.00505	6.79588	0.00913683	0.0201572
ENSMUSG00000060519_Tor3a	2255.55	-0.558869	0.249568	4.68656	0.0303994	0.0589742
ENSMUSG00000033557_Fam20b	787.202	-0.403213	0.107961	13.7878	0.000204663	0.000604526
ENSMUSG00000046057_Gm15428	5.5953	3.10177	0.631626	27.2888	1.75225788305981e-07	7.46345040991275e-07
ENSMUSG00000026594_Ralgps2	303.532	-1.54964	0.220723	46.1812	1.07804836016089e-11	6.52651703070242e-11
ENSMUSG00000101964_Gm28693	0.652603	-2.18992	3.02683	0.84979	0.356612	NA
ENSMUSG00000103303_Gm37802	1.69985	-0.442392	2.10446	0.0447756	0.832417	0.89695
ENSMUSG00000101905_4930439D14Rik	1.76561	-1.54918	1.29027	1.70702	0.191373	0.2888
ENSMUSG00000070565_Rasal2	120.901	1.77587	0.282073	37.1642	1.0858912499609e-09	5.64657558003271e-09
ENSMUSG00000103808_Gm37060	3.14184	-0.330737	2.18765	-0.330433	1	1
ENSMUSG00000049881_2810025M15Rik	172.023	1.36739	0.112741	146.228	1.15760485368056e-33	2.05633106862793e-32
ENSMUSG00000033488_BC026585	244.466	1.00938	0.151535	43.1597	5.04494341399286e-11	2.902924959952e-10
ENSMUSG00000026589_Sec16b	15.3086	-3.59817	0.665216	25.7612	3.86378824214084e-07	1.58478984029774e-06
ENSMUSG00000073530_Pappa2	4.16052	-1.21725	1.3122	0.581298	0.445804	0.563582
ENSMUSG00000047661_1600012P17Rik	2.23099	-4.04157	1.39618	8.01717	0.00463358	0.0108838
ENSMUSG00000040782_Rfwd2	764.682	0.433752	0.0708081	37.4169	9.53932373596968e-10	4.97930877035215e-09
ENSMUSG00000103572_Gm37115	2.18461	1.47186	2.33628	-0.130599	1	1
ENSMUSG00000015829_Tnr	10.5288	3.03104	0.654513	20.0402	7.58313642344295e-06	2.69708620946615e-05
ENSMUSG00000104111_Gm37294	1.96711	1.29631	1.03808	1.21294	0.270751	0.383051
ENSMUSG00000090394_4930523C07Rik	3025.15	-0.400305	0.0564662	50.0872	1.47065488661366e-12	9.49411997700368e-12
ENSMUSG00000026729_4930562F07Rik	14.4961	-0.567403	0.343974	2.71543	0.099382	0.166145
ENSMUSG00000026725_Tnn	1.00019	0.891985	2.41911	0.0905696	0.763454	NA
ENSMUSG00000058267_Mrps14	1854.34	0.480814	0.0986232	23.5403	1.22327532271576e-06	4.73954277551911e-06
ENSMUSG00000014226_Cacybp	2900.19	0.408001	0.05363	57.6394	3.14852002277262e-14	2.27041697804676e-13
ENSMUSG00000103006_4933417C20Rik	1.79157	-1.05989	1.74738	0.0163687	0.898196	0.945503
ENSMUSG00000026721_Rabgap1l	2233.66	0.555172	0.226182	5.59097	0.0180533	0.0369964
ENSMUSG00000104302_Gm36975	0.946918	1.88644	1.67193	1.01987	0.312551	NA
ENSMUSG00000103522_9430087J23Rik	3.40598	-1.19822	1.08245	1.00657	0.315726	0.432739
ENSMUSG00000103693_Gm37529	10.8565	-0.683982	0.698026	0.68139	0.409108	0.528714
ENSMUSG00000118401_	9.57206	2.06458	1.15537	1.43822	0.230427	0.336483
ENSMUSG00000104020_Gm37215	1.76997	1.99156	1.01126	3.82963	0.0503539	0.0923485
ENSMUSG00000103432_6720464F23Rik	4.71983	0.337238	0.935716	0.0915652	0.762197	0.841693
ENSMUSG00000102172_Gm37873	2.17149	0.11244	1.86243	0.00847503	0.92665	0.964806
ENSMUSG00000103200_Gm37328	0.926661	-0.451322	2.99985	0.0159891	0.899377	NA
ENSMUSG00000103632_Gm38329	16.6246	1.3848	0.530432	5.63742	0.0175811	0.0361292
ENSMUSG00000104053_Gm38126	13.5435	0.559324	0.701954	0.592495	0.441456	0.559688
ENSMUSG00000102852_Gm37083	2.19783	0.100604	1.09865	0.00664391	0.935036	0.970948
ENSMUSG00000040423_Rc3h1	477.729	-0.542721	0.0790642	46.9386	7.32460691159842e-12	4.49538074526439e-11
ENSMUSG00000103343_Gm37052	6.20633	0.182116	0.836421	0.0394846	0.842492	0.904015
ENSMUSG00000103846_Gm37809	1.32496	-0.297255	1.70501	0.00858432	0.92618	0.964526
ENSMUSG00000103739_Gm37653	7.65923	0.129376	0.978947	0.0140143	0.905765	0.950599
ENSMUSG00000026715_Serpinc1	26.4945	1.2247	0.24549	25.0617	5.55252480629541e-07	2.23629424169498e-06
ENSMUSG00000103222_Gm37729	0.656143	0.696471	2.89357	0.0314034	0.859344	NA
ENSMUSG00000043467_Zbtb37	114.015	0.172547	0.169661	1.02122	0.312229	0.42878
ENSMUSG00000104016_Gm37362	4.69249	1.83771	1.79521	1.22661	0.268066	0.380088
ENSMUSG00000053332_Gas5	2071.57	0.00833286	0.120021	0.00474719	0.945069	0.977314
ENSMUSG00000026709_Dars2	712.348	-0.909117	0.199335	19.9312	8.02779576784663e-06	2.84872704866189e-05
ENSMUSG00000026708_Cenpl	756.195	-1.22667	0.171934	48.4645	3.36320378295997e-12	2.11560639671788e-11
ENSMUSG00000026705_Klhl20	372.447	-0.703613	0.101662	47.5172	5.45238863376763e-12	3.37878864996522e-11
ENSMUSG00000102817_Gm6185	5.07462	-2.69726	0.707384	14.4578	0.000143333	0.000432777
ENSMUSG00000026701_Prdx6	10299.1	-0.956375	0.0714493	175.899	3.80994130244727e-40	8.38405797290549e-39
ENSMUSG00000026700_Tnfsf4	315.771	-1.09456	0.239031	19.351	1.0876427068795e-05	3.78964693015075e-05
ENSMUSG00000066755_Tnfsf18	43.9328	3.94986	0.470727	60.2277	8.44955617078611e-15	6.32017851777378e-14
ENSMUSG00000040323_Gm15429	3.38681	-0.169779	0.593291	0.0814465	0.775347	0.852324
ENSMUSG00000102399_Gm5049	1.47933	-2.43128	2.99667	0.600485	0.438393	0.556764
ENSMUSG00000000817_Fasl	1492.07	-5.06615	0.246269	307.886	6.30657559091008e-69	3.25817073722301e-67
ENSMUSG00000040297_Suco	1773.94	-0.824402	0.125877	41.7519	1.03620270819415e-10	5.83457617742577e-10
ENSMUSG00000102254_Gm7496	1.80071	-1.95857	1.23368	2.50329	0.113609	0.186114
ENSMUSG00000086277_4930558K02Rik	1.90254	-3.54674	1.30936	6.78338	0.00920104	0.0202825
ENSMUSG00000026698_Pigc	338.817	-0.690355	0.121637	31.9801	1.55756696166041e-08	7.27611161446382e-08
ENSMUSG00000040265_Dnm3	14.7413	-7.1178	0.80162	114.061	1.2637945574191e-26	1.7010639243014e-25
ENSMUSG00000026694_Mettl13	424.326	-0.751697	0.123252	36.5349	1.49960503870384e-09	7.68116776505521e-09
ENSMUSG00000026696_Vamp4	2253.86	-0.46182	0.049139	87.9562	6.69202663072721e-21	6.92581395416569e-20
ENSMUSG00000040225_Prrc2c	1677.21	-0.612356	0.148375	16.5168	4.82216439652121e-05	0.000155104
ENSMUSG00000098259_Gm27616	1.07977	-0.375944	1.5505	0.0547909	0.814927	0.883518
ENSMUSG00000040181_Fmo1	2.8955	-1.44298	2.30824	-0.121467	1	1
ENSMUSG00000040170_Fmo2	1.4009	-2.14527	3.01062	0.430319	0.511832	0.626736
ENSMUSG00000026586_Prrx1	12.8733	-3.07111	0.793112	9.96808	0.00159278	0.0040874
ENSMUSG00000040124_Gorab	202.948	-1.15667	0.16776	46.2213	1.05621716298778e-11	6.40446515754089e-11
ENSMUSG00000102117_Rpsa-ps1	1.2463	1.74043	1.02796	2.83551	0.0922013	0.155908
ENSMUSG00000026585_Kifap3	196.141	0.559463	0.165471	11.2142	0.00081173	0.00219071
ENSMUSG00000026584_Scyl3	845.924	-0.0665686	0.0985966	0.45481	0.50006	0.616061
ENSMUSG00000041406_BC055324	110.806	0.838116	0.217519	14.2491	0.000160141	0.000479972
ENSMUSG00000041396_Mettl18	80.0011	-0.981984	0.197308	24.3666	7.96385417067721e-07	3.15574101487224e-06
ENSMUSG00000026582_Sele	41.9172	-4.88484	0.863442	19.0974	1.24211004535533e-05	4.30126887792694e-05
ENSMUSG00000026581_Sell	4591.11	-2.80171	0.221432	134.258	4.7967755739967e-31	7.71954638344205e-30
ENSMUSG00000026580_Selp	10.6583	-1.36294	0.665024	3.50751	0.0610911	0.1093
ENSMUSG00000090081_Gm16587	4.39409	-2.76905	1.02626	6.05075	0.0139004	0.0293327
ENSMUSG00000086593_Gm16548	3.99591	-1.63433	0.941913	2.93087	0.0869005	0.148218
ENSMUSG00000026579_F5	620.125	-4.14212	0.37163	97.0679	6.6990252050615e-23	7.62019086679014e-22
ENSMUSG00000040918_Slc19a2	320.211	-0.33584	0.14434	5.3498	0.0207247	0.041924
ENSMUSG00000026578_Ccdc181	195.245	1.11202	0.133326	68.1887	1.48577376294824e-16	1.2274924876909e-15
ENSMUSG00000026577_Blzf1	557.647	0.0803082	0.0586447	1.87445	0.170966	0.263337
ENSMUSG00000026575_Nme7	135.311	0.299188	0.193468	2.33365	0.126605	0.204279
ENSMUSG00000026576_Atp1b1	501.363	-3.86917	0.286855	143.64	4.2590598627518e-33	7.36763541420251e-32
ENSMUSG00000104011_Gm32391	1.79644	-2.69883	1.46272	3.34584	0.0673749	0.119131
ENSMUSG00000026574_Dpt	6.24138	1.53572	1.28134	0.455781	0.499602	0.615654
ENSMUSG00000104117_Gm20743	36.3052	-8.19958	0.762388	254.758	2.38323865261574e-57	9.04545252568036e-56
ENSMUSG00000026573_Xcl1	1291.26	-4.85953	0.254105	269.572	1.40687817198987e-60	5.79906105860856e-59
ENSMUSG00000040848_Sft2d2	2624.88	0.0437002	0.0912756	0.228155	0.632895	0.736131
ENSMUSG00000040843_Tiprl	1844.06	-0.708038	0.101972	47.3591	5.91031636463643e-12	3.65429141164472e-11
ENSMUSG00000102302_Gm38190	16.0522	-2.62067	0.981922	3.29302	0.0695748	0.122422
ENSMUSG00000026571_Dcaf6	142.261	0.281258	0.243295	1.26465	0.260773	0.371754
ENSMUSG00000102401_Gm37864	1.16988	1.16062	3.00484	0.105123	0.745767	0.828356
ENSMUSG00000026568_Mpc2	2071.22	0.856506	0.0929488	83.4209	6.63165889930448e-20	6.54556582509342e-19
ENSMUSG00000103763_Gm37860	2.01024	-0.581799	1.46181	-0.0307224	1	1
ENSMUSG00000026566_Mpzl1	155.698	-0.245923	0.403506	0.296175	0.58629	0.695816
ENSMUSG00000040723_Rcsd1	3168.91	-0.305839	0.128666	5.56544	0.0183184	0.0374997
ENSMUSG00000040713_Creg1	3929.38	0.624531	0.110695	31.1777	2.35457320885117e-08	1.08199723553226e-07
ENSMUSG00000089829_Gm16565	26.8441	-2.61809	0.289904	86.086	1.72281711801984e-20	1.74162635554252e-19
ENSMUSG00000005763_Cd247	820.169	-3.6331	0.140501	573.556	9.45673810676036e-127	1.61836874368103e-124
ENSMUSG00000102363_Gm32999	1.42066	-3.85629	1.34568	8.93453	0.00279829	0.00687097
ENSMUSG00000103768_Gm37856	4.07466	-2.63377	1.18847	4.04875	0.0442041	0.0825227
ENSMUSG00000102154_Gm37469	12.5623	-6.44693	0.811634	88.4212	5.29012750141873e-21	5.50167519368925e-20
ENSMUSG00000026565_Pou2f1	240.393	-0.067959	0.123894	0.298691	0.584704	0.694278
ENSMUSG00000097196_Gm26665	0.688092	1.42392	3.03349	0.10032	0.751446	NA
ENSMUSG00000040612_Ildr2	5.71343	-1.45941	0.559536	6.87568	0.00873766	0.0193568
ENSMUSG00000103400_Gm15853	24.339	0.0346891	0.237688	0.0211429	0.88439	0.934873
ENSMUSG00000026563_Tada1	337.479	0.321228	0.0858634	13.9666	0.000186083	0.000552199
ENSMUSG00000040596_Pogk	391.697	-1.01786	0.122596	67.7102	1.89383094167211e-16	1.5558961705542e-15
ENSMUSG00000097823_Gm16701	2.85087	-4.22123	1.55801	6.50729	0.0107433	0.0232938
ENSMUSG00000060568_Fam78b	33.9304	-3.19572	0.658437	16.3092	5.38028408260715e-05	0.00017216
ENSMUSG00000026558_Uck2	4241.9	1.06463	0.162416	40.7396	1.73931008894826e-10	9.61839482829524e-10
ENSMUSG00000103139_Gm37982	0.82556	-2.50509	2.63893	1.17694	0.27798	NA
ENSMUSG00000102909_Gm2453	2.30863	-0.759054	0.828395	0.814335	0.366842	0.485886
ENSMUSG00000052428_Tmco1	1685.95	-0.17996	0.0762199	5.5674	0.0182979	0.0374657
ENSMUSG00000088246_Gm25911	0.667277	-0.259019	1.48652	0.0526129	0.818577	NA
ENSMUSG00000026687_Aldh9a1	2671.13	0.901407	0.118638	56.2181	6.4861963334272e-14	4.57903959936645e-13
ENSMUSG00000026688_Mgst3	119.412	0.347847	0.140396	6.10056	0.0135139	0.0285927
ENSMUSG00000015843_Rxrg	21.7751	-0.682315	0.426874	2.40831	0.120693	0.196149
ENSMUSG00000052534_Pbx1	311.425	2.92678	0.182262	229.282	8.55050358209023e-52	2.74979030466314e-50
ENSMUSG00000103780_Gm37524	0.712496	2.36789	2.65688	1.02889	0.31042	NA
ENSMUSG00000026683_Nuf2	233.375	1.83541	0.225062	62.9036	2.17069948097339e-15	1.68172178463286e-14
ENSMUSG00000026678_Rgs5	24.9459	0.436885	0.709842	0.352946	0.55245	0.665088
ENSMUSG00000038530_Rgs4	8.16705	-4.50315	1.54323	5.34993	0.0207231	0.041924
ENSMUSG00000026675_Hsd17b7	233.168	0.659065	0.276694	5.53455	0.0186446	0.0381022
ENSMUSG00000097503_3110045C21Rik	5.59248	1.7466	0.837119	3.53867	0.0599536	0.107586
ENSMUSG00000026674_Ddr2	11.5378	-0.91954	0.806536	1.06206	0.302746	0.418427
ENSMUSG00000026670_Uap1	5240.29	0.335453	0.150699	4.81972	0.0281359	0.0550399
ENSMUSG00000104266_Gm37748	5.73745	0.333567	1.0626	0.0924101	0.761135	0.840701
ENSMUSG00000026667_Uhmk1	1351.67	-0.218651	0.117885	3.38579	0.0657608	0.116632
ENSMUSG00000044306_4930500M09Rik	5.57092	2.27851	0.56421	17.0981	3.54978997476536e-05	0.000115979
ENSMUSG00000073494_Sh2d1b2	1.33042	-4.58031	2.01861	-0.307984	1	1
ENSMUSG00000096964_Gm6345	4.72658	1.18759	1.37738	0.578041	0.447081	0.564878
ENSMUSG00000102418_Sh2d1b1	204.408	-1.34641	0.218192	35.8877	2.09028817925344e-09	1.05655468174448e-08
ENSMUSG00000102752_Gm7694	92.6585	-1.86074	0.257477	49.0081	2.54901983469962e-12	1.61404239087174e-11
ENSMUSG00000038473_Nos1ap	68.1816	-1.23046	0.202357	36.3217	1.67291121187559e-09	8.51651771527738e-09
ENSMUSG00000102193_Gm7299	6.624	0.883252	0.564904	2.26145	0.13263	0.212427
ENSMUSG00000038463_Olfml2b	15.0587	-5.84357	1.37737	11.5146	0.000690533	0.00188459
ENSMUSG00000026663_Atf6	2511.13	-0.52781	0.0770793	46.4734	9.28730023683664e-12	5.6600853303481e-11
ENSMUSG00000053925_Gm9929	2.0879	-1.56005	1.38278	1.55231	0.212794	0.315001
ENSMUSG00000026659_Dusp12	129.671	-0.386086	0.130275	8.74743	0.00310039	0.00755085
ENSMUSG00000096968_Gm26620	1.44611	0.602065	1.36524	0.082333	0.77416	0.851505
ENSMUSG00000070524_Fcrlb	120.882	3.41633	0.44017	46.2383	1.04710336149074e-11	6.35724742784071e-11
ENSMUSG00000038421_Fcrla	314.846	4.50569	0.354674	119.433	8.42022296991024e-28	1.19019479103444e-26
ENSMUSG00000089838_Gm2962	2.81407	1.7059	1.13652	1.77649	0.182581	0.277829
ENSMUSG00000026656_Fcgr2b	6118.17	-0.832376	0.287582	7.34389	0.00672909	0.0152764
ENSMUSG00000103676_Gm38204	0.738043	-1.85221	1.96036	1.11721	0.29052	NA
ENSMUSG00000104340_Gm10522	7.75518	-2.60425	0.550071	22.9375	1.67355167101577e-06	6.40003289671974e-06
ENSMUSG00000059089_Fcgr4	407.671	-1.26726	0.264655	20.9248	4.77670610573948e-06	1.74191639894803e-05
ENSMUSG00000059498_Fcgr3	2031.06	-2.61453	0.12679	380.431	1.00245539693806e-84	7.7476058843193e-83
ENSMUSG00000026649_Cfap126	61.696	0.942134	0.190676	24.0924	9.1823041697919e-07	3.61019946712618e-06
ENSMUSG00000058076_Sdhc	1968.12	0.0229212	0.0960409	0.0565369	0.812056	0.881501
ENSMUSG00000056569_Mpz	10.0232	3.49618	1.15858	6.85301	0.00884923	0.0195768
ENSMUSG00000038370_Pcp4l1	14.3013	-0.986883	0.588439	2.51816	0.112542	0.184651
ENSMUSG00000005677_Nr1i3	0.700618	0.697712	1.77868	0.183082	0.668738	NA
ENSMUSG00000005674_Tomm40l	118.403	-0.152073	0.1532	0.982999	0.32146	0.438579
ENSMUSG00000005681_Apoa2	3.25026	-1.11627	1.035	1.12261	0.289357	0.403705
ENSMUSG00000058715_Fcer1g	15516.7	-2.09561	0.112804	317.468	5.15621423125646e-71	2.88974146697347e-69
ENSMUSG00000013593_Ndufs2	2528.96	0.165368	0.0736887	5.01086	0.0251888	0.0499063
ENSMUSG00000006403_Adamts4	2.90959	4.70751	2.84998	2.68515	0.101288	0.168843
ENSMUSG00000052423_B4galt3	473.993	0.436005	0.062893	48.0162	4.22704931971074e-12	2.64080359553115e-11
ENSMUSG00000062729_Ppox	923.651	-0.170549	0.0664809	6.56285	0.010413	0.0226647
ENSMUSG00000053483_Usp21	614.223	0.0133719	0.0650886	0.0421778	0.837281	0.900475
ENSMUSG00000062963_Ufc1	1181.08	0.340535	0.097776	12.0701	0.00051236	0.00142801
ENSMUSG00000079137_Rpl27-ps1	0.79004	-1.63975	1.89972	0.829136	0.362522	NA
ENSMUSG00000103983_Gm20045	6.53906	-1.62387	0.851352	3.45956	0.062887	0.112095
ENSMUSG00000013973_Dedd	52.0993	-0.581681	0.221959	6.74629	0.00939428	0.0206776
ENSMUSG00000013997_Nit1	378.391	0.363887	0.109169	10.9964	0.000912896	0.00244515
ENSMUSG00000006412_Pfdn2	1085.37	0.155001	0.0642408	5.81752	0.0158673	0.0329607
ENSMUSG00000102929_Gm37154	0.936253	-1.31072	2.67554	0.238262	0.625464	NA
ENSMUSG00000045259_Klhdc9	4.34969	-1.62238	0.756319	4.30958	0.0378984	0.0717856
ENSMUSG00000006411_Nectin4	104.308	-2.19452	0.657047	8.63837	0.00329156	0.00797893
ENSMUSG00000048865_Arhgap30	5726.21	0.162229	0.0684262	5.60268	0.017933	0.0367578
ENSMUSG00000026641_Usf1	1006.03	0.366262	0.084288	18.7745	1.47118939834952e-05	5.06343817528557e-05
ENSMUSG00000103711_Tstd1	16.4167	0.68772	0.34564	3.89369	0.0484679	0.0893598
ENSMUSG00000038235_F11r	1110.66	0.338712	0.0854604	15.6225	7.73298291250252e-05	0.00024306
ENSMUSG00000091993_B930036N10Rik	11.3069	-1.02558	0.411572	6.03674	0.0140112	0.0295307
ENSMUSG00000060244_Alyref2	67.3193	0.244082	0.183413	1.75068	0.185791	0.28164
ENSMUSG00000004709_Cd244	1887.06	-0.856709	0.111647	57.5657	3.26869628046676e-14	2.35441945162369e-13
ENSMUSG00000004707_Ly9	1774.86	-0.710492	0.113553	38.667	5.02639070556446e-10	2.67985620733113e-09
ENSMUSG00000038179_Slamf7	5885.9	1.92975	0.163557	126.705	2.15594136310119e-29	3.27959746877464e-28
ENSMUSG00000103219_Gm37787	14.2546	1.29088	0.294094	19.5716	9.68991868440303e-06	3.40158738871709e-05
ENSMUSG00000103083_A630035G10Rik	3.11005	2.05414	1.75356	1.11738	0.290482	0.40501
ENSMUSG00000103137_Gm37981	0.939927	1.48903	3.01869	0.163622	0.685843	NA
ENSMUSG00000015355_Cd48	5135.67	0.0451396	0.0951012	0.223269	0.63656	0.739227
ENSMUSG00000103883_Gm37010	2.63483	1.83712	1.00911	2.66114	0.102827	0.170994
ENSMUSG00000059058_Tma7-ps	2.90326	0.414465	0.639932	0.418477	0.517698	0.632221
ENSMUSG00000015316_Slamf1	472.573	-1.065	0.374477	6.60345	0.0101781	0.0221989
ENSMUSG00000038147_Cd84	1191.14	-2.13944	0.170047	143.981	3.58711971179147e-33	6.22211072542145e-32
ENSMUSG00000073492_Gm10521	0.937925	-2.32843	3.02015	0.71074	0.399198	NA
ENSMUSG00000104413_Gm37065	10.1849	1.82351	0.575951	8.9935	0.00270942	0.00667498
ENSMUSG00000015314_Slamf6	609.802	-0.214976	0.271388	0.570279	0.450148	0.568004
ENSMUSG00000026556_Vangl2	94.3616	2.06119	0.16197	161.166	6.29485717767483e-37	1.22118954984305e-35
ENSMUSG00000003458_Ncstn	4027.83	-0.234587	0.0880613	7.03496	0.00799336	0.0178336
ENSMUSG00000026553_Copa	8314.93	0.241797	0.0738006	10.7022	0.00107006	0.00283403
ENSMUSG00000103380_Gm37756	1.00522	2.03313	1.19883	3.37813	0.0660668	NA
ENSMUSG00000003464_Pex19	1130.16	-0.0347021	0.111839	0.0954228	0.757393	0.837726
ENSMUSG00000026554_Dcaf8	2316.21	-0.158364	0.058585	7.29877	0.00690017	0.0156294
ENSMUSG00000013698_Pea15a	2944.98	-0.114885	0.0999229	1.30923	0.252534	0.362381
ENSMUSG00000038034_Igsf8	2297.96	0.418517	0.0708301	34.7662	3.71769619539409e-09	1.83841803346539e-08
ENSMUSG00000007097_Atp1a2	2.38586	0.37186	1.8516	0.00671269	0.934702	0.970758
ENSMUSG00000038026_Kcnj9	2.20638	0.690929	2.61918	0.0474779	0.827512	0.893019
ENSMUSG00000044708_Kcnj10	5.15798	-0.786375	0.963229	0.424549	0.514676	0.629402
ENSMUSG00000050229_Pigm	662.771	0.146478	0.0641537	5.20689	0.0224975	0.045134
ENSMUSG00000102278_Gm37145	6.40196	1.38276	0.836342	1.8804	0.170288	0.262553
ENSMUSG00000103357_Gm7804	1.8036	2.68109	1.84862	2.03779	0.153432	0.240461
ENSMUSG00000026548_Slamf9	499.925	1.49109	0.308045	20.6415	5.53832046547923e-06	2.00439932707403e-05
ENSMUSG00000037995_Igsf9	293.291	2.96589	0.276562	95.521	1.46328707077937e-22	1.64401074358899e-21
ENSMUSG00000026547_Tagln2	19066.7	0.701265	0.105005	43.6357	3.9555604617519e-11	2.29468000515734e-10
ENSMUSG00000104351_Gm37125	13.1063	-0.83758	0.782607	1.03702	0.308515	0.424806
ENSMUSG00000026546_Cfap45	91.8238	2.50346	0.4325	27.3369	1.70919579949813e-07	7.28813256707022e-07
ENSMUSG00000085184_4933439K11Rik	8.57703	1.12787	0.421242	7.17032	0.00741196	0.0166802
ENSMUSG00000049598_Vsig8	2.86842	3.15029	1.40093	4.30339	0.0380364	0.0720185
ENSMUSG00000053318_Slamf8	3358.51	1.58366	0.289294	25.6305	4.1345500267e-07	1.69150310270563e-06
ENSMUSG00000070504_Fcrl6	10.6059	-6.31995	0.838831	72.5532	1.62592103693728e-17	1.42627132791656e-16
ENSMUSG00000026544_Dusp23	87.1763	-0.481462	0.200894	5.71766	0.0167951	0.0346738
ENSMUSG00000005339_Fcer1a	206.541	-9.92755	0.800144	216.758	4.60882610536385e-49	1.38895235788536e-47
ENSMUSG00000037872_Ackr1	8.78904	0.000719626	0.87191	-6.27602460667731e-07	1	1
ENSMUSG00000005338_Cadm3	31.0811	0.654256	0.373889	2.88965	0.0891501	0.151538
ENSMUSG00000037860_Aim2	858.176	0.552274	0.139534	15.3242	9.05487061234311e-05	0.00028179
ENSMUSG00000037849_Ifi206	828.928	-3.15236	0.215659	181.927	1.83986463727654e-41	4.30057140276579e-40
ENSMUSG00000070501_Ifi214	85.864	-1.94502	0.379602	24.479	7.51256840101928e-07	2.9861758304093e-06
ENSMUSG00000073491_Ifi213	1399.46	-2.53155	0.276181	74.3066	6.68799093670303e-18	5.97895159905723e-17
ENSMUSG00000043263_Ifi209	4933.74	-1.22376	0.189677	39.449	3.36732549150786e-10	1.81653610176558e-09
ENSMUSG00000066677_Ifi208	75.325	-2.08499	0.649481	9.49203	0.00206367	0.00521206
ENSMUSG00000073490_Ifi207	4051.56	-0.774391	0.188915	15.8876	6.72170177301525e-05	0.000212459
ENSMUSG00000073489_Ifi204	3142.23	-2.1099	0.296366	44.9856	1.98484408420325e-11	1.17964361432321e-10
ENSMUSG00000090222_Ifi203-ps	36.2009	-2.56377	0.938881	6.31096	0.0119994	0.0257377
ENSMUSG00000090272_Mndal	2725.09	-1.66297	0.118132	187.124	1.34959430613421e-42	3.31636846995825e-41
ENSMUSG00000026536_Ifi211	1736.97	0.0126672	0.288132	0.00175559	0.966579	0.990676
ENSMUSG00000039997_Ifi203	1645.65	-2.08363	0.114994	304.972	2.72035126188837e-68	1.37575125690275e-66
ENSMUSG00000026535_Ifi202b	5.4089	1.47749	1.83717	0.420556	0.51666	0.631195
ENSMUSG00000103588_Gm18445	4.51139	3.36893	1.0954	7.82536	0.00515182	0.0119836
ENSMUSG00000054203_Ifi205	8712.8	2.83674	0.260734	98.0285	4.12407880980473e-23	4.73614251333297e-22
ENSMUSG00000045381_Olfr433	79.5497	4.1396	0.582366	36.6106	1.44244806918654e-09	7.40026823931972e-09
ENSMUSG00000047048_Olfr432	2.34739	3.89316	1.63962	4.88171	0.0271428	0.0533531
ENSMUSG00000028354_Fmn2	2.87072	2.11731	2.99548	0.292546	0.588594	0.698161
ENSMUSG00000026526_Fh1	2171.16	0.400982	0.148108	7.1283	0.00758765	0.0170296
ENSMUSG00000039783_Kmo	2218.24	2.88678	0.34852	51.9154	5.79445251366739e-13	3.85098028188151e-12
ENSMUSG00000026525_Opn3	65.731	0.962025	0.27779	11.5747	0.000668546	0.00183005
ENSMUSG00000078185_Chml	97.5284	1.07031	0.356618	8.36244	0.00383057	0.00915468
ENSMUSG00000039748_Exo1	86.1449	2.14791	0.279668	55.5618	9.05671160162845e-14	6.33540114118294e-13
ENSMUSG00000078184_Rbm8a2	4.38857	-0.784407	0.610645	1.54559	0.213788	0.316155
ENSMUSG00000057335_Cep170	1549.1	0.465314	0.101784	20.6173	5.6086082154268e-06	2.02715809287357e-05
ENSMUSG00000104154_Gm38104	4.05313	1.12953	1.00385	0.739981	0.389667	0.509014
ENSMUSG00000026504_Sdccag8	1239.62	0.399573	0.112293	12.5342	0.000399564	0.0011309
ENSMUSG00000103367_Gm38158	245.67	-0.314185	0.0864117	13.2092	0.000278573	0.000808266
ENSMUSG00000102211_Gm37490	6.95327	2.50103	0.56624	19.9775	7.83568680105914e-06	2.7832951985897e-05
ENSMUSG00000103251_Gm37519	2.61888	0.333726	1.02646	0.102394	0.748976	0.830997
ENSMUSG00000019699_Akt3	222.152	0.484931	0.123605	15.3475	8.94372721225816e-05	0.000278558
ENSMUSG00000104391_Gm37960	1.91086	0.417949	1.2898	0.0847983	0.770897	0.848793
ENSMUSG00000102749_Gm37598	2.30885	1.59212	1.11126	1.77982	0.182172	0.277404
ENSMUSG00000103646_Gm37706	2.20558	0.53027	1.04598	0.28064	0.596282	0.704699
ENSMUSG00000097892_Gm26801	3.41963	-2.20903	1.62169	1.8449	0.174377	0.267726
ENSMUSG00000063659_Zbtb18	461.272	1.32525	0.106313	151.485	8.21130630609399e-35	1.50321020027606e-33
ENSMUSG00000103767_Gm37858	1.53651	2.53872	2.96397	0.68674	0.407275	0.526767
ENSMUSG00000101746_2310043L19Rik	5.36422	1.44447	0.686035	3.9946	0.0456462	0.0848019
ENSMUSG00000015961_Adss	1824.06	0.0727589	0.0830509	0.762858	0.382436	0.501549
ENSMUSG00000091476_Gm16432	7.70694	1.66628	0.659668	5.1908	0.0227067	0.045506
ENSMUSG00000026502_Desi2	612.495	-0.283669	0.0741474	14.6037	0.000132657	0.000402698
ENSMUSG00000104126_Gm37486	11.9959	-0.682769	0.377251	3.23538	0.0720635	0.126256
ENSMUSG00000086350_B230369F24Rik	5.4946	1.09852	0.960463	0.975588	0.32329	0.4405
ENSMUSG00000026500_Cox20	15.4397	-0.456623	0.322023	2.00417	0.156867	0.244903
ENSMUSG00000039630_Hnrnpu	15864.5	0.0701549	0.0650768	1.16063	0.281335	0.395189
ENSMUSG00000026495_Efcab2	76.5574	-0.299759	0.220564	1.80716	0.178849	0.273212
ENSMUSG00000026494_Kif26b	2.44778	-1.00505	2.1111	0.0432291	0.835295	0.899241
ENSMUSG00000055067_Smyd3	469.125	-0.727243	0.0999036	52.4652	4.37944385545736e-13	2.93191758217084e-12
ENSMUSG00000026492_Tfb2m	142.87	-0.364826	0.1463	6.17333	0.012969	0.0275706
ENSMUSG00000038949_Cnst	548.358	-1.48259	0.306345	20.0516	7.53819077080706e-06	2.68359031396841e-05
ENSMUSG00000038936_Sccpdh	173.402	0.334847	0.203752	2.67567	0.101892	0.169646
ENSMUSG00000026491_Ahctf1	905.047	-0.0081363	0.116339	0.00487713	0.944324	0.977036
ENSMUSG00000026490_Cdc42bpa	29.7252	0.117063	0.785537	0.0157503	0.900128	0.946965
ENSMUSG00000026489_Coq8a	1458.54	-2.65762	0.210049	137.208	1.08618537561469e-31	1.78856658886657e-30
ENSMUSG00000104520_Gm37336	1.8164	2.52585	2.82512	0.0748712	0.784372	0.859728
ENSMUSG00000010609_Psen2	1175.01	-0.671363	0.111317	35.6902	2.31321422330853e-09	1.16310013164099e-08
ENSMUSG00000102923_Gm31728	2.78434	0.583682	1.07186	0.220078	0.63898	0.74123
ENSMUSG00000055676_Gm5069	4.54215	1.5873	0.713564	4.63336	0.0313561	0.0606155
ENSMUSG00000038855_Itpkb	784.82	-0.958843	0.10632	79.8782	3.98214044747816e-19	3.78411928392731e-18
ENSMUSG00000104388_Gm37033	81.2215	0.012348	0.278614	0.00193219	0.964939	0.989869
ENSMUSG00000103123_Gm37390	16.2209	0.616976	0.301039	4.16164	0.0413493	0.0777231
ENSMUSG00000103772_Gm36933	16.7502	0.26377	0.505548	0.255394	0.613302	0.719762
ENSMUSG00000053963_Stum	2.44789	-1.21752	1.31498	0.498454	0.48018	0.597766
ENSMUSG00000102608_Gm37267	7.29937	1.9886	0.552926	12.7987	0.000346851	0.000991661
ENSMUSG00000026496_Parp1	2267.21	-0.0576702	0.119788	0.229395	0.631973	0.735435
ENSMUSG00000058729_Lin9	191.676	0.561684	0.142413	15.3924	8.73405887785798e-05	0.000272426
ENSMUSG00000026499_Acbd3	1386.3	0.186005	0.0794938	5.45562	0.0195054	0.0396711
ENSMUSG00000103649_Gm37768	9.76319	-0.0749681	0.643241	0.0106246	0.917903	0.959525
ENSMUSG00000060743_H3f3a	7461.01	0.146705	0.0965401	2.29198	0.130044	0.209019
ENSMUSG00000073485_H3f3aos	2.76423	-1.22287	1.17427	1.04875	0.305795	0.422001
ENSMUSG00000038806_Sde2	3093.59	-0.641662	0.0927571	47.151	6.57228979976095e-12	4.04531402029602e-11
ENSMUSG00000103979_Gm20305	0.718561	-1.40394	1.87803	0.819062	0.365455	NA
ENSMUSG00000066652_Lefty2	2.04104	-2.60168	2.16112	0.283512	0.594408	0.703013
ENSMUSG00000026520_Pycr2	914.829	0.558271	0.0768305	52.3934	4.54247528383203e-13	3.03681980346036e-12
ENSMUSG00000038793_Lefty1	41.5243	2.20565	0.295333	53.3133	2.84370069674415e-13	1.92665999485667e-12
ENSMUSG00000026519_Tmem63a	525.305	-0.552514	0.1335	17.0222	3.69452129551231e-05	0.00012041
ENSMUSG00000038776_Ephx1	342.983	0.565772	0.143929	15.2224	9.55606705004043e-05	0.000295851
ENSMUSG00000026516_Nvl	663.858	0.679291	0.1329	25.7141	3.95916949781503e-07	1.62182948845096e-06
ENSMUSG00000062169_Cnih4	1131.48	0.836847	0.160162	26.2226	3.04244417909319e-07	1.26112732657178e-06
ENSMUSG00000038733_Wdr26	1774.22	-0.167567	0.121398	1.87917	0.170429	0.262695
ENSMUSG00000081214_Rpl35a-ps2	37.6231	0.456676	0.320907	1.96564	0.160912	0.25028
ENSMUSG00000103260_Gm8146	0.770353	2.155	1.85976	1.61583	0.203675	NA
ENSMUSG00000047369_Dnah14	3.36337	-3.2051	1.10557	5.87093	0.0153929	0.0320691
ENSMUSG00000004880_Lbr	3903.71	-1.07804	0.0921253	133.315	7.71608850991739e-31	1.23450975350239e-29
ENSMUSG00000056699_Gm5533	0.790808	-2.13633	3.02749	0.606139	0.436245	NA
ENSMUSG00000022995_Enah	23.6986	0.871995	0.303909	8.16905	0.00426111	0.0100868
ENSMUSG00000026511_Srp9	1305.18	0.13944	0.0552117	6.36773	0.0116214	0.0250081
ENSMUSG00000038633_Degs1	4079.76	-0.350347	0.0840709	17.2113	3.34441991104632e-05	0.000109783
ENSMUSG00000047539_Fbxo28	1270.79	-0.317634	0.123505	6.55664	0.0104494	0.0227388
ENSMUSG00000073482_Gm10517	2.67037	-2.93367	1.43459	1.56847	0.21043	0.312127
ENSMUSG00000026510_Trp53bp2	576.092	-1.42133	0.1974	49.7946	1.70709761689572e-12	1.09761623693526e-11
ENSMUSG00000026509_Capn2	2549.72	-0.115148	0.0875961	1.71676	0.190111	0.287212
ENSMUSG00000102234_Gm37885	0.901575	1.03324	2.34253	-0.695527	1	NA
ENSMUSG00000038576_Susd4	4.27147	-2.81576	1.41566	1.63761	0.200654	0.300088
ENSMUSG00000079164_Tlr5	170.97	-0.883931	0.344596	5.87219	0.0153819	0.0320497
ENSMUSG00000104367_Gm38079	8.39973	-0.892224	0.666468	1.53605	0.215207	0.317823
ENSMUSG00000030768_Disp1	197.773	-0.943986	0.272597	11.5648	0.000672117	0.00183904
ENSMUSG00000102478_BC085271	4.13687	-0.317581	0.639491	0.238052	0.625617	0.730369
ENSMUSG00000046836_Brox	1247.14	-0.0412199	0.119323	0.117701	0.731541	0.817053
ENSMUSG00000042901_Aida	324.82	-0.1342	0.141147	0.894796	0.344181	0.462584
ENSMUSG00000056050_Mia3	2488.93	-0.246763	0.11277	4.75233	0.0292586	0.0569861
ENSMUSG00000103415_Gm37339	0.725926	-1.27563	2.34514	0.492011	0.483031	NA
ENSMUSG00000072258_Taf1a	278.052	0.255875	0.132279	3.69842	0.054464	0.0988233
ENSMUSG00000103451_Gm33973	10.7086	-0.541342	0.333516	2.64626	0.103794	0.172379
ENSMUSG00000039384_Dusp10	1481.85	-0.987967	0.0585907	280.511	5.81049287638363e-63	2.53112993094648e-61
ENSMUSG00000044854_1700056E22Rik	56.3418	1.24156	0.176887	49.2692	2.23134317298005e-12	1.4194541850816e-11
ENSMUSG00000102682_Gm37223	2.52092	1.14649	0.796496	1.83001	0.176127	0.269871
ENSMUSG00000102794_Gm37712	15.1442	0.86817	0.876739	0.630405	0.427207	0.546358
ENSMUSG00000103308_Gm37800	10.382	1.52222	0.638705	4.76763	0.0289997	0.0565278
ENSMUSG00000102606_Rpl21-ps1	1.10369	0.800507	2.3879	0.163453	0.685997	0.780754
ENSMUSG00000039377_Hlx	1003.44	0.938398	0.219574	16.9504	3.83694856568726e-05	0.000124691
ENSMUSG00000102158_Gm34342	7.35482	0.331886	0.607557	0.287974	0.591522	0.700766
ENSMUSG00000026621_Marc1	3.73595	-3.60337	0.969443	13.2634	0.000270644	0.000786928
ENSMUSG00000073481_Marc2	1566.45	-0.382315	0.0379879	101.186	8.37486081968393e-24	9.97024579694918e-23
ENSMUSG00000039349_C130074G19Rik	5.2257	1.78345	1.0251	2.01691	0.155555	0.243171
ENSMUSG00000026620_Mark1	8.54299	0.940884	1.29234	0.499115	0.479889	0.597546
ENSMUSG00000039318_Rab3gap2	883.628	-0.426806	0.115849	13.489	0.000239964	0.000702948
ENSMUSG00000026618_Iars2	1417.98	-0.802259	0.144265	30.0036	4.31237845075205e-08	1.93617610132501e-07
ENSMUSG00000065581_Mir194-1	0.890963	0.102894	3.00252	-0.000361262	1	NA
ENSMUSG00000102526_Gm37785	6.79018	-3.77341	1.52938	2.95091	0.0858294	0.146621
ENSMUSG00000026617_Bpnt1	4018.99	-1.89222	0.199116	80.9428	2.3234174447441e-19	2.22822684204822e-18
ENSMUSG00000097261_4930532G15Rik	29.4353	-2.83873	0.756991	8.6909	0.00319802	0.00776593
ENSMUSG00000026615_Eprs	13955.8	-1.20594	0.156576	56.398	5.91916242202012e-14	4.19418063374712e-13
ENSMUSG00000051295_9630028B13Rik	0.887296	-1.72027	2.52762	0.596903	0.439762	NA
ENSMUSG00000026614_Slc30a10	1.21708	-2.59907	2.215	1.72923	0.188509	0.285062
ENSMUSG00000039246_Lyplal1	9.06743	0.789509	0.617321	1.39494	0.237573	0.344758
ENSMUSG00000039239_Tgfb2	9.5186	-1.82005	1.00624	2.5679	0.109052	0.179818
ENSMUSG00000001305_Rrp15	543.221	-0.198029	0.0742522	7.09944	0.00771081	0.0172696
ENSMUSG00000097784_A430105J06Rik	3.49279	-2.97792	0.895651	10.5409	0.00116759	0.00306984
ENSMUSG00000097935_Gm3809	1.16343	-0.657035	0.980114	0.446952	0.503786	0.619495
ENSMUSG00000039210_Gpatch2	397.929	0.616252	0.100901	37.1204	1.11054366735615e-09	5.76850690303939e-09
ENSMUSG00000104394_Gm37254	34.1545	0.419924	0.349362	1.33618	0.247708	0.356764
ENSMUSG00000104245_Gm38155	1.7122	0.012439	2.98358	-0.000125221	1	1
ENSMUSG00000026608_Kctd3	222.904	-0.179654	0.109563	2.68136	0.101529	0.169156
ENSMUSG00000102824_Pdcd5-ps	2.25366	-0.0137308	0.823728	0.000266046	0.986986	1
ENSMUSG00000026605_Cenpf	122.834	2.01699	0.22827	73.9203	8.13375119249448e-18	7.22091751304038e-17
ENSMUSG00000026604_Ptpn14	6.25448	-4.27641	1.21539	7.25738	0.00706103	0.0159604
ENSMUSG00000104435_Gm37422	45.9402	1.46152	0.264328	29.0921	6.90169374040415e-08	3.04803603507664e-07
ENSMUSG00000026603_Smyd2	369.31	-0.0692795	0.169268	0.163455	0.685995	0.780754
ENSMUSG00000010175_Prox1	8.15623	-1.81255	1.42375	0.282062	0.595353	0.703823
ENSMUSG00000089872_Rps6kc1	667.469	1.14513	0.158812	49.6109	1.87468121571389e-12	1.20093632558784e-11
ENSMUSG00000026634_Angel2	1360.66	-0.404574	0.0719847	31.4869	2.00786123892322e-08	9.27341599191357e-08
ENSMUSG00000037568_Vash2	11.8185	-0.894367	1.13162	0.602237	0.437726	0.556138
ENSMUSG00000066595_Mfsd7b	1622.86	0.0099006	0.104088	0.00902718	0.924306	0.963464
ENSMUSG00000097845_A230020J21Rik	1.46148	-2.42992	1.36673	2.84622	0.0915891	0.155037
ENSMUSG00000057072_Spata45	0.82282	-0.0048984	2.30788	0.000250719	0.987367	NA
ENSMUSG00000026632_Tatdn3	222.613	0.0294071	0.176092	0.0273648	0.868611	0.923336
ENSMUSG00000062510_Nsl1	156.074	1.44515	0.242879	33.2126	8.26124767186976e-09	3.97049483768124e-08
ENSMUSG00000026630_Batf3	1115.16	1.73502	0.0836882	410.641	2.65804151829371e-91	2.33700375142823e-89
ENSMUSG00000102777_Gm38161	1.12464	-2.30081	1.90846	-0.19883	1	1
ENSMUSG00000091017_Fam71a	11.7824	2.27397	0.627948	10.6445	0.00110399	0.00291622
ENSMUSG00000026628_Atf3	17130.5	0.176832	0.163927	1.12222	0.28944	0.403763
ENSMUSG00000073478_D730003I15Rik	71.2599	0.14671	0.173989	0.709439	0.39963	0.519549
ENSMUSG00000103685_Gm37074	2.67071	-0.824161	1.34484	0.444746	0.504841	0.620364
ENSMUSG00000103174_Gm37168	18.9819	1.06428	0.564135	2.76229	0.0965101	0.162164
ENSMUSG00000037499_Nenf	262.031	0.696145	0.178927	14.8574	0.000115951	0.000354567
ENSMUSG00000026627_Tmem206	866.419	0.0836627	0.184908	0.196862	0.657266	0.757171
ENSMUSG00000026626_Ppp2r5a	5427.38	-0.524621	0.0623364	70.439	4.74720114553672e-17	4.04758026496897e-16
ENSMUSG00000103114_Gm32200	0.916805	-2.63493	3.01288	0.904077	0.341691	NA
ENSMUSG00000102246_9430037O13Rik	0.76291	1.38225	2.10579	0.494652	0.481859	NA
ENSMUSG00000037474_Dtl	436.456	1.40133	0.230575	34.1457	5.11348533111793e-09	2.49326312239983e-08
ENSMUSG00000037461_Ints7	906.871	0.449586	0.0635239	49.9636	1.56625280613294e-12	1.00874890911123e-11
ENSMUSG00000102970_Gm37349	0.992681	1.8602	2.00398	0.976266	0.323122	NA
ENSMUSG00000026623_Lpgat1	1403.58	0.927677	0.116279	61.8962	3.62051309803371e-15	2.7746651159541e-14
ENSMUSG00000102840_Gm38037	4.28368	4.79934	1.18088	14.6277	0.000130979	0.000397981
ENSMUSG00000026622_Nek2	235.852	2.29037	0.433768	24.445	7.64601924050899e-07	3.03544429956164e-06
ENSMUSG00000055833_1700034H15Rik	2.82448	-1.36118	1.32893	0.755375	0.38478	0.503969
ENSMUSG00000037434_Slc30a1	1419.9	-0.507638	0.208069	5.62705	0.0176854	0.0363163
ENSMUSG00000049353_Rd3	19.0381	-7.50239	0.850568	93.3264	4.43446055392398e-22	4.88478766879661e-21
ENSMUSG00000097416_Gm26670	2.57951	-2.38117	1.04089	5.14197	0.0233542	0.0466669
ENSMUSG00000026637_Traf5	544.3	0.951295	0.109105	74.4891	6.09745268977034e-18	5.47143612850318e-17
ENSMUSG00000103653_Gstp-ps	46.4841	-0.792916	0.178855	19.6928	9.09427262303222e-06	3.20304894093456e-05
ENSMUSG00000037395_Rcor3	148.038	0.0759691	0.213911	0.121179	0.72776	0.813636
ENSMUSG00000097316_Gm10516	6.38809	3.55975	1.33504	3.31779	0.0685338	0.120845
ENSMUSG00000037375_Hhat	59.7139	-0.794593	0.194961	16.5097	4.8401859553873e-05	0.000155631
ENSMUSG00000016262_Sertad4	2.654	0.424713	2.4408	-0.00189118	1	1
ENSMUSG00000016181_Diexf	82.5639	0.274333	0.293109	0.860196	0.353684	0.472676
ENSMUSG00000026638_Irf6	113.344	-0.0482313	0.154468	0.0968923	0.755591	0.836264
ENSMUSG00000079144_A130010J15Rik	170.087	0.49835	0.117497	17.8702	2.36498168774098e-05	7.91368785072125e-05
ENSMUSG00000037318_Traf3ip3	934.991	0.108066	0.0924737	1.35763	0.243949	0.352324
ENSMUSG00000090080_Gm15872	0.716642	0.887493	3.01683	0.069845	0.791563	NA
ENSMUSG00000089683_4930570N18Rik	27.2578	-0.358833	0.273416	1.71219	0.190702	0.287878
ENSMUSG00000026639_Lamb3	102.041	-0.289098	0.335138	0.741817	0.38908	0.508454
ENSMUSG00000016194_Hsd11b1	1001.48	-4.97341	0.267428	250.011	2.58277676707973e-56	9.44734394935444e-55
ENSMUSG00000103089_Gm38118	4.69734	-5.27291	1.62247	9.07845	0.0025864	0.00639328
ENSMUSG00000009633_G0s2	220.336	-3.67823	0.35866	86.0082	1.79188928808765e-20	1.81049773246052e-19
ENSMUSG00000104348_Gm37691	2.14597	-0.191481	1.21373	0.0669039	0.795899	0.869181
ENSMUSG00000026640_Plxna2	9.93278	-4.34373	0.765492	32.834	1.0037337292198e-08	4.77502218613947e-08
ENSMUSG00000016494_Cd34	60.2258	0.29727	0.272578	1.15188	0.283155	0.397163
ENSMUSG00000097325_Gm16897	2.68997	-4.0109	1.58819	5.65157	0.0174397	0.0358823
ENSMUSG00000096929_A330023F24Rik	1.07112	-1.0758	1.27141	0.62002	0.43104	0.54994
ENSMUSG00000104525_Gm37334	1.40347	-3.22634	1.68849	3.84408	0.0499218	0.0916348
ENSMUSG00000103867_9630010A21Rik	7.1157	-1.85629	1.1958	2.08714	0.148544	0.233876
ENSMUSG00000016493_Cd46	11.2918	-0.538384	0.406514	1.72977	0.18844	0.285002
ENSMUSG00000104010_Gm37366	1.01019	-2.11582	2.47645	0.502029	0.47861	0.596612
ENSMUSG00000016481_Cr1l	1774.64	-0.578674	0.0516801	124.748	5.77834814270282e-29	8.59221092716718e-28
ENSMUSG00000026616_Cr2	30.7364	1.47907	0.786136	1.63421	0.201122	0.300741
ENSMUSG00000050530_Fam171a1	29.2026	0.61504	0.34705	2.99408	0.0835693	0.143169
ENSMUSG00000026643_Nmt2	364.925	0.346414	0.0989692	12.1816	0.000482627	0.00134906
ENSMUSG00000049950_Rpp38	193.58	0.045773	0.162931	0.0784362	0.779428	0.855722
ENSMUSG00000026644_Acbd7	18.508	-7.43094	0.811321	117.203	2.59129943895022e-27	3.60431323268207e-26
ENSMUSG00000026650_Meig1	4.98895	-0.302944	0.738039	0.157453	0.691513	0.785063
ENSMUSG00000026648_Dclre1c	1060.4	0.362251	0.234074	2.2305	0.13531	0.216107
ENSMUSG00000026646_Suv39h2	185.497	0.425068	0.191537	4.86921	0.0273401	0.0536693
ENSMUSG00000085043_Gm13184	1.28039	-1.21888	1.19525	0.942333	0.331678	0.449405
ENSMUSG00000109865_Hspa14	2270.28	0.663958	0.062541	111.672	4.21498680153527e-26	5.56395675103488e-25
ENSMUSG00000051396_Gm45902	258.753	1.0728	0.180238	33.9592	5.62789873680828e-09	2.73365268850493e-08
ENSMUSG00000039496_Cdnf	1.90432	-1.68658	1.56089	0.495043	0.481686	0.598936
ENSMUSG00000026655_Fam107b	10342.4	-0.714001	0.120621	34.6669	3.91233940692738e-09	1.92969144139416e-08
ENSMUSG00000081070_Gm13181	0.680859	0.675545	1.59197	0.3114	0.576823	NA
ENSMUSG00000085205_Gm13185	0.867694	-2.21576	1.58408	1.91967	0.165893	NA
ENSMUSG00000026657_Frmd4a	977.503	0.16462	0.136866	1.43422	0.231077	0.337271
ENSMUSG00000039449_Prpf18	1708.07	0.238551	0.109474	4.71674	0.0298703	0.0580477
ENSMUSG00000026662_Sephs1	1014.04	0.0836527	0.0613662	1.85573	0.173118	0.266149
ENSMUSG00000026664_Phyh	1709.89	0.28848	0.0658731	19.136	1.21729796269889e-05	4.21687150750942e-05
ENSMUSG00000086670_Gm13194	0.680416	-1.23423	2.30397	-0.404184	1	NA
ENSMUSG00000026669_Mcm10	219.765	1.7235	0.140652	144.695	2.50358891516936e-33	4.36635930273441e-32
ENSMUSG00000026672_Optn	152.325	-0.489251	0.195155	6.14013	0.0132147	0.0280414
ENSMUSG00000026676_Ccdc3	10.9594	-2.40308	1.37981	0.686592	0.407326	0.526767
ENSMUSG00000080820_Gm13197	0.919053	2.6392	2.52884	1.24548	0.264418	NA
ENSMUSG00000039145_Camk1d	4165.95	1.65018	0.108419	218.568	1.85637287659903e-49	5.6657800837219e-48
ENSMUSG00000039128_Cdc123	1480.95	0.260357	0.0422751	37.8912	7.4803375535848e-10	3.93348778846529e-09
ENSMUSG00000025817_Nudt5	505.724	0.505249	0.079488	40.2225	2.26617675970044e-10	1.24173270306399e-09
ENSMUSG00000056718_Gm13199	1.72237	0.177337	1.03532	0.0221403	0.881715	0.933047
ENSMUSG00000025816_Sec61a2	98.2011	-0.555428	0.245859	4.84657	0.0277011	0.0542891
ENSMUSG00000043241_Upf2	346.779	-0.131329	0.117169	1.24886	0.263769	0.375244
ENSMUSG00000045319_Proser2	176.714	4.77753	0.254505	315.618	1.30449472052183e-70	7.24731892992517e-69
ENSMUSG00000039063_Echdc3	6.8209	-2.49422	0.97074	4.8735	0.0272722	0.053558
ENSMUSG00000087125_A230108P19Rik	0.702834	3.19701	3.01103	-0.956215	1	NA
ENSMUSG00000087485_Gm13383	2.87693	2.80924	0.991213	7.26944	0.00701377	0.0158642
ENSMUSG00000039046_Usp6nl	739.091	0.917905	0.176007	26.4375	2.72208700312035e-07	1.13595126472475e-06
ENSMUSG00000085716_Gm13388	1.08116	-2.03791	1.36128	2.79217	0.0947257	0.15953
ENSMUSG00000086109_Gm13391	28.0233	0.117197	0.287972	0.163765	0.685714	0.780607
ENSMUSG00000102599_Gm38386	2.6353	-2.76249	1.03145	6.35759	0.011688	0.0251318
ENSMUSG00000002107_Celf2	4377.27	-0.200074	0.0659409	9.17376	0.0024551	0.00610335
ENSMUSG00000015619_Gata3	1182.25	-5.05065	0.122984	1500.27	0	0
ENSMUSG00000025782_Taf3	525.156	-0.433149	0.0782402	30.5444	3.26320191835096e-08	1.48072422275172e-07
ENSMUSG00000025781_Atp5c1	7400.88	0.638293	0.0653426	94.4654	2.4941007250495e-22	2.77771229500429e-21
ENSMUSG00000037262_Kin	533.044	-0.261765	0.106343	6.03987	0.0139863	0.029488
ENSMUSG00000025780_Itih5	98.4206	-2.45103	0.433344	28.85	7.82068289693404e-08	3.43883985055138e-07
ENSMUSG00000061186_Sfmbt2	43.8879	-4.17212	1.02186	6.1302	0.0132892	0.0281762
ENSMUSG00000083900_Gm13294	0.652073	-0.311768	1.439	0.0153257	0.901476	NA
ENSMUSG00000026778_Prkcq	1154.85	-4.71013	0.356245	122.722	1.60382604514591e-28	2.33768317926324e-27
ENSMUSG00000102196_Gm38171	0.90188	0.144829	2.65451	-0.00482727	1	NA
ENSMUSG00000103223_Gm37730	0.845716	0.502071	2.33413	-0.37049	1	NA
ENSMUSG00000082424_Gm13292	1.37218	0.142324	1.05056	0.0104091	0.918737	0.959799
ENSMUSG00000026773_Pfkfb3	3820.3	1.20066	0.177539	42.8876	5.79767140402319e-11	3.32507384203808e-10
ENSMUSG00000102329_Gm10851	214.984	1.05269	0.272721	13.4283	0.000247854	0.000724511
ENSMUSG00000102376_Gm37975	7.2238	0.0954228	0.959581	0.00884973	0.925051	0.963987
ENSMUSG00000037197_Rbm17	2507.86	0.666663	0.0353697	353.677	6.7043261515267e-79	4.52471194881381e-77
ENSMUSG00000026770_Il2ra	2875.76	-3.21012	0.304792	87.1805	9.90539474394667e-21	1.0147338378259e-19
ENSMUSG00000104101_Gm37881	10.7268	-2.02555	0.462471	19.546	9.82058232870771e-06	3.44241224386139e-05
ENSMUSG00000023206_Il15ra	779.37	0.624697	0.0979912	40.1352	2.36975537750629e-10	1.29626430709655e-09
ENSMUSG00000058594_Fbxo18	1538.6	0.0487844	0.10607	0.209264	0.647345	0.748622
ENSMUSG00000047909_Ankrd16	447.536	-0.0365167	0.0928065	0.154075	0.694671	0.787482
ENSMUSG00000026768_Itga8	372.134	3.83669	0.284749	142.179	8.88532749620986e-33	1.5138228632876e-31
ENSMUSG00000086843_E030013I19Rik	26.7787	8.07675	0.84356	112.425	2.88359686651995e-26	3.82226148966721e-25
ENSMUSG00000026767_Fam188a	1137.69	0.242512	0.0668906	13.1022	0.000294944	0.000852412
ENSMUSG00000102630_Gm37289	3.76176	1.27219	0.83066	1.94114	0.163545	0.253942
ENSMUSG00000104449_Gm37255	2.7217	-0.0104525	0.883283	0.000125872	0.991049	1
ENSMUSG00000104406_Gm38014	5.15291	1.73022	1.28117	0.662382	0.41572	0.535203
ENSMUSG00000026730_Pter	60.6697	0.788556	0.31352	5.85194	0.0155598	0.0323958
ENSMUSG00000049630_C1ql3	3.09386	-3.52045	1.06134	9.31933	0.00226749	0.00568488
ENSMUSG00000102900_Gm37811	0.67352	-1.99381	3.02932	0.558807	0.454741	NA
ENSMUSG00000026727_Rsu1	3773.85	0.562892	0.114779	23.5961	1.18825622585708e-06	4.61038604878595e-06
ENSMUSG00000102691_Gm37780	46.5168	1.24985	0.505076	4.53341	0.0332393	0.0638694
ENSMUSG00000086358_Gm13270	1.06471	-2.30838	3.02481	0.66792	0.413778	0.533052
ENSMUSG00000026723_Trdmt1	231.463	-0.0868237	0.183295	0.218735	0.640006	0.742182
ENSMUSG00000026728_Vim	18945.1	0.527246	0.122746	18.0223	2.18331197448642e-05	7.34038600508354e-05
ENSMUSG00000003418_St8sia6	814.201	0.798219	0.261241	8.54916	0.00345683	0.00834366
ENSMUSG00000063275_Hacd1	31.4968	0.338149	0.291616	1.3108	0.252249	0.362026
ENSMUSG00000103926_Gm37894	1.90693	-2.51588	2.85942	0.657953	0.417283	0.536747
ENSMUSG00000086657_Stamos	6.49233	-2.1668	0.759552	7.39508	0.00654024	0.0148933
ENSMUSG00000026718_Stam	368.511	0.0383455	0.16947	0.0500893	0.822908	0.889253
ENSMUSG00000103901_Gm37499	1.44887	-0.218427	2.99275	0.00607141	0.937892	0.972372
ENSMUSG00000061531_Tmem236	4.38125	-3.45075	2.30441	1.45933	0.227036	0.332437
ENSMUSG00000026712_Mrc1	896.253	-0.316031	0.528477	0.269505	0.603664	0.710933
ENSMUSG00000057914_Cacnb2	62.4844	2.8336	0.287229	93.342	4.39953530057462e-22	4.84910253629176e-21
ENSMUSG00000070271_Gm13268	0.671214	0.0653272	1.63352	0.0035208	0.952684	NA
ENSMUSG00000102673_Gm37437	2.13261	3.67419	2.12226	2.48185	0.115167	0.188329
ENSMUSG00000026707_Nsun6	215.026	-0.358273	0.149668	5.69386	0.0170243	0.035113
ENSMUSG00000103778_Gm36930	2.68682	3.2956	1.10593	7.68057	0.00558185	0.0128838
ENSMUSG00000017418_Arl5b	1734.84	-0.463982	0.12917	12.643	0.000376975	0.00107108
ENSMUSG00000102258_Gm38257	17.6948	-4.00673	0.895033	11.6658	0.000636581	0.00175005
ENSMUSG00000026748_Plxdc2	324.065	-2.15773	0.481749	14.3386	0.000152702	0.000459255
ENSMUSG00000053702_Nebl	366.625	-8.00965	0.805224	53.2052	3.00466304892277e-13	2.03069029120954e-12
ENSMUSG00000054057_A930004D18Rik	8.3275	2.4941	0.616071	15.4253	8.58308918437391e-05	0.000267979
ENSMUSG00000086340_1810059C17Rik	0.763495	2.09806	1.91548	1.59485	0.206634	NA
ENSMUSG00000026743_Mllt10	532.986	-0.234081	0.104242	5.02005	0.0250554	0.0496779
ENSMUSG00000092814_Gm23638	1.17577	1.5438	1.54227	0.779407	0.377323	0.496543
ENSMUSG00000026740_Dnajc1	1072.74	-0.17291	0.154307	1.22097	0.26917	0.381258
ENSMUSG00000082520_Gm13349	1.2884	0.531384	1.08785	0.274441	0.600368	0.708139
ENSMUSG00000051154_Commd3	1209.3	0.288155	0.100404	8.17605	0.00424471	0.0100529
ENSMUSG00000026739_Bmi1	742.946	0.231939	0.0969731	5.67563	0.0172021	0.0354454
ENSMUSG00000097638_Carlr	4.12652	0.376205	0.962464	0.128515	0.719977	0.807067
ENSMUSG00000026737_Pip4k2a	10259.9	0.92589	0.122305	55.4573	9.55108021940435e-14	6.66177418359983e-13
ENSMUSG00000026736_4930426L09Rik	5.80954	1.2922	0.679324	3.30831	0.0689304	0.121466
ENSMUSG00000037683_Armc3	21.0199	-2.80449	0.499932	28.1652	1.11391905880429e-07	4.83261353555951e-07
ENSMUSG00000023094_Msrb2	56.2888	-0.076661	0.3401	0.046987	0.828392	0.893566
ENSMUSG00000043415_Otud1	504.344	-0.499558	0.11365	19.174	1.19326014882511e-05	4.137340317028e-05
ENSMUSG00000036617_Etl4	1.84458	-2.89366	2.15516	1.81143	0.178337	0.272604
ENSMUSG00000060795_Gm13363	0.921547	-1.84322	1.26646	2.10736	0.146592	NA
ENSMUSG00000036591_Arhgap21	477.984	0.802298	0.143145	30.7555	2.92672772307249e-08	1.33309387519321e-07
ENSMUSG00000085206_Gm13380	0.914782	-1.34587	2.24601	-0.766462	1	NA
ENSMUSG00000075514_Gm13375	14.8593	0.0444892	0.404499	0.0117342	0.913738	0.956454
ENSMUSG00000026679_Enkur	35.4306	-0.026802	0.358543	0.00548864	0.940942	0.974643
ENSMUSG00000048550_Thnsl1	92.9109	1.35089	0.161814	68.5167	1.2580635974918e-16	1.04341432164108e-15
ENSMUSG00000083863_Gm13341	10.1557	0.185082	0.486436	0.138047	0.71023	0.799353
ENSMUSG00000083563_Gm13340	12.7885	-0.257845	0.331417	0.59293	0.441289	0.559514
ENSMUSG00000026787_Gad2	1.57592	-1.71621	2.12567	-0.664588	1	1
ENSMUSG00000026786_Apbb1ip	1007.32	-0.700119	0.156866	19.4063	1.05659844003972e-05	3.68751316464701e-05
ENSMUSG00000069136_A130006I12Rik	3.19538	0.338599	0.750721	0.182022	0.669641	0.76714
ENSMUSG00000026784_Pdss1	96.5168	-0.195855	0.133276	2.15894	0.141743	0.224881
ENSMUSG00000084625_Gm25544	0.898845	-2.03423	1.56086	1.54771	0.213474	NA
ENSMUSG00000058835_Abi1	3904.12	0.031832	0.0846254	0.140775	0.707511	0.797323
ENSMUSG00000083650_Gm13357	1.91624	-0.261692	1.5269	0.0243872	0.875904	0.928796
ENSMUSG00000026781_Acbd5	1189.25	0.22703	0.0605292	14.0358	0.000179365	0.000533586
ENSMUSG00000026779_Mastl	52.0165	0.586627	0.266947	4.68507	0.0304258	0.0590195
ENSMUSG00000026775_Yme1l1	1548.7	-0.151338	0.100954	2.23598	0.134831	0.215502
ENSMUSG00000081648_Gm13423	2.47316	-1.97245	1.0564	2.92516	0.0872088	0.148671
ENSMUSG00000026774_4931423N10Rik	0.860229	-2.05948	3.02831	0.49014	0.483865	NA
ENSMUSG00000084098_Gm13422	0.945312	0.521215	1.32638	0.209664	0.647031	NA
ENSMUSG00000102704_Gm38309	2.13695	-1.81776	1.8968	-0.117517	1	1
ENSMUSG00000026771_Spopl	321.752	-0.217014	0.147289	2.14905	0.142658	0.22609
ENSMUSG00000026986_Hnmt	22.5595	-3.30147	0.492459	43.6087	4.01043270515833e-11	2.3244016830895e-10
ENSMUSG00000044103_Il1f9	4.46896	-0.262614	1.44036	0.0880447	0.766678	0.844827
ENSMUSG00000085999_Gm13411	2.07841	-2.90892	2.63143	1.07695	0.299381	0.414853
ENSMUSG00000026981_Il1rn	9418.69	-1.47588	0.184897	59.0244	1.55732794600558e-14	1.14059246240309e-13
ENSMUSG00000026979_Psd4	2582.74	-0.768438	0.123167	38.0549	6.87820999537881e-10	3.62581548353756e-09
ENSMUSG00000004113_Cacna1b	7.32853	2.05948	0.739339	6.22695	0.012582	0.0268612
ENSMUSG00000036893_Ehmt1	1289.4	0.370848	0.114921	10.2841	0.0013418	0.00349101
ENSMUSG00000026972_Arrdc1	2429.59	0.0543458	0.0542938	1.00049	0.317192	0.433979
ENSMUSG00000026974_Zmynd19	273.653	0.390244	0.118914	10.7196	0.00106006	0.00281025
ENSMUSG00000026975_Dph7	208.07	0.0846379	0.157386	0.283966	0.594113	0.702769
ENSMUSG00000036850_Mrpl41	739.518	0.144422	0.0909124	2.52128	0.11232	0.184349
ENSMUSG00000036833_Pnpla7	1604.2	-0.348468	0.139407	6.10339	0.0134923	0.0285532
ENSMUSG00000084383_Gm13370	0.619722	-1.8203	2.17876	0.781659	0.376634	NA
ENSMUSG00000083796_Gm13369	1.83702	-3.02814	1.44776	3.74866	0.0528498	0.096217
ENSMUSG00000006476_Nsmf	659.379	-0.59081	0.194242	8.81002	0.0029958	0.00731752
ENSMUSG00000092845_Gm24328	0.899612	-3.07369	2.11	2.78894	0.094917	NA
ENSMUSG00000036805_Noxa1	12.9169	-6.39692	0.883538	56.2354	6.42946946500625e-14	4.54066474708087e-13
ENSMUSG00000087028_Gm13387	9.18271	-2.76994	1.30308	2.07197	0.150028	0.235897
ENSMUSG00000078202_Nrarp	73.1986	-3.51284	0.289424	137.824	7.96406506286056e-32	1.3193365173712e-30
ENSMUSG00000059555_Tor4a	842.286	-0.723864	0.178684	15.6478	7.63011293531795e-05	0.000239905
ENSMUSG00000013465_Nelfb	1647.5	-0.219208	0.0716188	9.35309	0.0022261	0.00558843
ENSMUSG00000026969_Fam166a	1.3106	-0.805221	1.6289	0.454823	0.500053	0.616061
ENSMUSG00000036752_Tubb4b	1691.19	-0.645484	0.145228	19.224	1.16239769208939e-05	4.03389321849812e-05
ENSMUSG00000036731_Cysrt1	0.878316	-2.9211	1.67048	3.78685	0.0516569	NA
ENSMUSG00000044628_Rnf208	7.44152	-6.12175	0.880614	54.1522	1.85545150151891e-13	1.2696693655699e-12
ENSMUSG00000006471_Ndor1	177.614	-0.344507	0.123105	7.77893	0.00528592	0.0122598
ENSMUSG00000078201_Tmem203	111.543	0.102712	0.185765	0.302149	0.582538	0.692263
ENSMUSG00000048707_Tprn	604.362	-0.357935	0.176634	3.95354	0.0467729	0.0866347
ENSMUSG00000026966_Ssna1	1102.93	-0.213874	0.0981172	4.70935	0.029999	0.0582624
ENSMUSG00000026965_Anapc2	2444.34	-0.214308	0.1224	3.01568	0.082463	0.141666
ENSMUSG00000026959_Grin1	4.28057	1.77761	0.967422	2.6858	0.101246	0.168796
ENSMUSG00000036646_Man1b1	1792.65	0.378028	0.0973782	14.9368	0.000111175	0.000340942
ENSMUSG00000088171_Gm25220	2.25676	0.759758	1.07634	0.48764	0.484982	0.60205
ENSMUSG00000026958_Dpp7	627.392	0.559472	0.100259	30.8187	2.83298904671833e-08	1.29223943499406e-07
ENSMUSG00000026956_Uap1l1	1451.83	0.605744	0.140048	18.1972	1.991704537522e-05	6.72805796099474e-05
ENSMUSG00000026955_Sapcd2	47.8601	1.31249	0.372634	11.2182	0.000809982	0.00218722
ENSMUSG00000015085_Entpd2	3.95284	-1.4395	1.1091	1.51536	0.218323	0.32156
ENSMUSG00000015094_Npdc1	22.1814	1.09484	0.611723	2.50702	0.11334	0.1858
ENSMUSG00000036587_Fut7	66.0851	-0.497947	0.506162	0.857941	0.354316	0.473219
ENSMUSG00000026944_Abca2	1278.87	-1.69682	0.184987	77.3054	1.46462093689601e-18	1.35223456153592e-17
ENSMUSG00000047617_BC029214	393.626	-0.553388	0.0715603	59.7414	1.08175438901282e-14	8.02088447745019e-14
ENSMUSG00000015093_Clic3	19.1811	0.400462	0.631825	0.35978	0.548628	0.661493
ENSMUSG00000015083_C8g	58.9396	-0.174028	0.198129	0.766766	0.381219	0.500401
ENSMUSG00000015095_Fbxw5	1360.12	-0.123039	0.0894282	1.88022	0.17031	0.262553
ENSMUSG00000026942_Traf2	1629.51	-0.490882	0.107465	20.599	5.6625480528951e-06	2.0458823474051e-05
ENSMUSG00000015092_Edf1	3456.43	0.0331603	0.039376	0.708691	0.399879	0.519696
ENSMUSG00000026941_Mamdc4	10.4819	-0.429222	0.671441	0.358219	0.549497	0.662361
ENSMUSG00000036504_Phpt1	34.2505	-0.284457	0.253505	1.23453	0.266527	0.378353
ENSMUSG00000029419_Gm996	21.0234	-0.0406464	0.560092	0.00439269	0.947157	0.978351
ENSMUSG00000015087_Rabl6	953.258	0.21406	0.114688	3.46082	0.0628391	0.11202
ENSMUSG00000052403_Fcnaos	3.22936	-1.15402	0.961694	1.30898	0.25258	0.362419
ENSMUSG00000026940_Ccdc183	2.36872	-0.421252	1.91174	0.0508557	0.821581	0.88842
ENSMUSG00000026939_Tmem141	319.426	0.799136	0.145206	29.5338	5.49494996484343e-08	2.44365907137248e-07
ENSMUSG00000026938_Fcna	17.2009	0.513764	0.483185	1.06037	0.303132	0.418838
ENSMUSG00000047356_Lcn10	0.747562	-2.2077	3.02393	0.719161	0.396419	NA
ENSMUSG00000049086_Bmyc	144.451	0.912439	0.126027	52.1221	5.2155819254006e-13	3.47590607663954e-12
ENSMUSG00000058740_Kcnt1	1.85431	-2.4616	3.00677	0.539055	0.462825	0.580522
ENSMUSG00000026933_Camsap1	266.451	0.498338	0.12657	15.3724	8.82688409471058e-05	0.000275187
ENSMUSG00000036352_Ubac1	854.754	0.789953	0.0718673	119.521	8.05487103454005e-28	1.14023421801351e-26
ENSMUSG00000026932_Nacc2	280.724	1.78546	0.128195	186.12	2.23514672330117e-42	5.4229186386726e-41
ENSMUSG00000087679_C330006A16Rik	194.306	0.403688	0.0920521	19.2237	1.16258288407073e-05	4.03389321849812e-05
ENSMUSG00000087595_1810012K08Rik	1.23385	2.15891	1.56912	1.82764	0.176406	0.27015
ENSMUSG00000036327_Qsox2	178.328	0.0571966	0.213493	0.0705967	0.79047	0.864681
ENSMUSG00000026930_Gpsm1	390.61	-0.750799	0.0877138	72.6415	1.5547560324416e-17	1.36446927077876e-16
ENSMUSG00000075467_Dnlz	425.29	0.29222	0.0967142	9.0902	0.00256983	0.00635723
ENSMUSG00000026928_Card9	111.973	-0.139649	0.383357	0.125091	0.723577	0.809904
ENSMUSG00000086779_Gm13562	7.46247	-0.239438	0.413762	0.326935	0.567469	0.67869
ENSMUSG00000036281_Snapc4	302.678	-0.17372	0.106578	2.64931	0.103595	0.172092
ENSMUSG00000085767_Gm13563	15.2079	-0.878578	0.299212	8.66468	0.00324437	0.0078725
ENSMUSG00000026927_Sdccag3	1262.88	-0.191659	0.0733099	6.82639	0.00898206	0.0198523
ENSMUSG00000026926_Pmpca	2184.2	0.33974	0.0777224	19.033	1.28478325630978e-05	4.44181830333504e-05
ENSMUSG00000026925_Inpp5e	416.622	-0.264125	0.184114	2.03393	0.153822	0.240934
ENSMUSG00000026924_Sec16a	1167.6	-0.156196	0.108029	2.07147	0.150077	0.235955
ENSMUSG00000086714_0610009E02Rik	3.35943	-0.0732853	0.676422	0.0112395	0.915569	0.957847
ENSMUSG00000085543_Gm13568	1.64425	0.473487	1.02603	0.188822	0.663899	0.762692
ENSMUSG00000026923_Notch1	245.61	-3.20269	0.449594	41.9791	9.22563299861844e-11	5.2195426023043e-10
ENSMUSG00000026921_Egfl7	22.1216	2.44086	0.685778	10.3947	0.00126376	0.00330186
ENSMUSG00000026922_Agpat2	293.962	-1.71308	0.109807	238.165	9.88252488175159e-54	3.38247061443808e-52
ENSMUSG00000036186_Fam69b	9.03228	-3.39786	0.683745	24.6329	6.93568771892981e-07	2.76720080159716e-06
ENSMUSG00000026919_Lcn4	18.1514	-1.72022	0.376564	20.1396	7.19915066910184e-06	2.57005254003865e-05
ENSMUSG00000036160_Surf6	523.19	-0.562122	0.142335	15.2177	9.57996333575358e-05	0.000296473
ENSMUSG00000015776_Med22	636.25	0.239829	0.0682947	12.3045	0.000451875	0.0012676
ENSMUSG00000062647_Rpl7a	3144.89	0.305877	0.117237	6.72561	0.00950385	0.0209019
ENSMUSG00000065258_Gm23969	2.99562	-1.10227	0.688368	2.56772	0.109065	0.179823
ENSMUSG00000015790_Surf1	447.944	-0.27711	0.157211	3.07009	0.0797451	0.137663
ENSMUSG00000014873_Surf2	358.722	-0.201396	0.121963	2.71971	0.0991158	0.165787
ENSMUSG00000014867_Surf4	7057.16	-0.0627743	0.0617478	1.0313	0.309853	0.426067
ENSMUSG00000049897_Stkld1	13.5565	2.55327	0.565668	18.8224	1.4347102691392e-05	4.94232417839524e-05
ENSMUSG00000052406_Rexo4	1082.88	0.568426	0.078736	51.8296	6.05328612112028e-13	4.01742850012162e-12
ENSMUSG00000014852_Adamts13	4.79178	3.33721	1.02936	7.51653	0.00611353	0.0140048
ENSMUSG00000015488_Cacfd1	466.367	-0.224937	0.100324	4.98991	0.0254955	0.0504774
ENSMUSG00000036067_Slc2a6	1976.1	-0.328171	0.124031	6.88244	0.00870468	0.0192904
ENSMUSG00000009614_Sardh	5.1931	-1.92793	0.870622	3.63235	0.0566666	0.102358
ENSMUSG00000009621_Vav2	1187.9	0.442864	0.115622	14.6168	0.000131738	0.000400099
ENSMUSG00000109946_D2Bwg1423e	4.80886	-3.13674	1.71979	0.758287	0.383865	0.502959
ENSMUSG00000026918_Brd3	572.428	0.0936685	0.0723944	1.67268	0.1959	0.294449
ENSMUSG00000026917_Wdr5	747.646	0.0485125	0.078718	0.379013	0.538132	0.651407
ENSMUSG00000085929_Gm13421	1.48726	1.09779	1.3987	0.534377	0.464772	0.582546
ENSMUSG00000015846_Rxra	701.4	-0.271711	0.0857147	9.99584	0.00156894	0.0040327
ENSMUSG00000026837_Col5a1	25.1326	-0.805874	0.353615	5.00837	0.025225	0.0499729
ENSMUSG00000026835_Fcnb	20.4464	-7.09079	0.837528	87.2819	9.41033779375214e-21	9.6556715467263e-20
ENSMUSG00000086425_F730016J06Rik	12.9383	-4.29832	0.973913	13.9069	0.000192096	0.000569073
ENSMUSG00000026833_Olfm1	5872.07	2.16882	0.22906	77.6901	1.20545670816987e-18	1.11997036963121e-17
ENSMUSG00000087196_Gm13373	111.753	1.10165	0.198135	29.9878	4.34772702326504e-08	1.95158978582953e-07
ENSMUSG00000026831_1700007K13Rik	1.15861	2.59785	3.02085	0.715585	0.397596	0.517396
ENSMUSG00000035772_Mrps2	431.82	0.372957	0.127428	8.43388	0.00368293	0.00883266
ENSMUSG00000082895_Rpsa-ps9	34.1045	0.679245	0.318634	4.42459	0.0354247	0.0676213
ENSMUSG00000026829_Gbgt1	14.1944	0.606319	0.424274	1.96351	0.161138	0.25057
ENSMUSG00000063611_Gm10134	25.4935	-0.343653	0.533473	0.396428	0.52894	0.64296
ENSMUSG00000026821_Ralgds	1490.27	-1.31042	0.213143	35.4243	2.65163154529734e-09	1.32699273704214e-08
ENSMUSG00000026816_Gtf3c5	515.403	0.255396	0.110516	5.32504	0.0210211	0.0424564
ENSMUSG00000026815_Gfi1b	27.2045	-0.149914	0.643569	0.0523966	0.818944	0.886519
ENSMUSG00000026812_Tsc1	329.112	-0.41295	0.118613	12.059	0.000515442	0.00143618
ENSMUSG00000026809_Spaca9	49.6329	-0.911946	0.443522	3.48266	0.062015	0.110757
ENSMUSG00000026807_Ak8	69.08	-0.0235114	0.383224	0.00358563	0.952251	0.981952
ENSMUSG00000035666_Gtf3c4	335.512	0.883951	0.176388	24.5694	7.16804593904667e-07	2.85693359354767e-06
ENSMUSG00000026806_Ddx31	263.634	-0.0300712	0.104782	0.0821223	0.774442	0.851653
ENSMUSG00000079502_Cfap77	1.94136	0.142222	2.38495	0.000344972	0.985181	1
ENSMUSG00000083773_Gm13394	3.17915	0.176634	0.707725	0.0611848	0.804633	0.875924
ENSMUSG00000026803_Ttf1	399.607	-0.344192	0.105176	10.6547	0.00109791	0.00290138
ENSMUSG00000043535_Setx	581.246	-0.568872	0.168869	10.9262	0.000948148	0.00253214
ENSMUSG00000035513_Ntng2	26.6536	-0.355415	0.423766	0.668024	0.413741	0.53305
ENSMUSG00000079499_6530402F18Rik	405.513	-0.639715	0.192182	10.7905	0.00102024	0.00271258
ENSMUSG00000026799_Med27	587.468	0.183814	0.0506806	13.1491	0.000287661	0.00083224
ENSMUSG00000039844_Rapgef1	1065.82	-0.352896	0.0636544	30.6148	3.14680654268456e-08	1.42993933152288e-07
ENSMUSG00000039826_Trub2	196.01	-0.427344	0.136503	9.68326	0.00185954	0.00472212
ENSMUSG00000026798_Coq4	115.266	0.719991	0.162004	19.3813	1.07048018798511e-05	3.73392061203104e-05
ENSMUSG00000059316_Slc27a4	298.3	-0.933922	0.132822	48.7622	2.88962226990336e-12	1.82248733291338e-11
ENSMUSG00000069020_Urm1	327.99	-0.0128661	0.13279	0.00929854	0.92318	0.962761
ENSMUSG00000039798_2600006K01Rik	4.07752	0.497687	0.708948	0.490913	0.483521	0.600625
ENSMUSG00000039787_Cercam	156.82	0.122051	0.151317	0.649798	0.420185	0.539466
ENSMUSG00000026790_Odf2	1278.27	-0.00372296	0.0843691	0.00193435	0.964919	0.989869
ENSMUSG00000019715_Gle1	1100.62	-0.25055	0.141944	3.04841	0.0808162	0.139324
ENSMUSG00000057738_Sptan1	1651.51	-0.73034	0.141349	26.0277	3.36557875753593e-07	1.38876314414836e-06
ENSMUSG00000039715_Wdr34	71.0505	1.08566	0.197196	29.8849	4.58481101898376e-08	2.05368246788646e-07
ENSMUSG00000054766_Set	4964.72	0.504156	0.0488636	105.942	7.59182273021171e-25	9.42438253043833e-24
ENSMUSG00000026785_Pkn3	215.21	2.58098	0.192921	162.836	2.71616288641846e-37	5.36155448444724e-36
ENSMUSG00000015335_Zdhhc12	134.914	-0.161748	0.153278	1.09917	0.294448	0.409556
ENSMUSG00000039686_Zer1	467.217	-0.359861	0.079647	20.3492	6.45193699858217e-06	2.31667809014283e-05
ENSMUSG00000039678_Tbc1d13	38.8325	-0.164265	0.35649	0.206693	0.649372	0.750246
ENSMUSG00000015337_Endog	97.2153	-0.955762	0.135627	49.7096	1.78274094837674e-12	1.14471677579688e-11
ENSMUSG00000039660_Spout1	378.448	0.418627	0.166832	6.21816	0.0126446	0.0269768
ENSMUSG00000039648_Kyat1	89.3413	-0.340563	0.214751	2.49579	0.114151	0.186891
ENSMUSG00000100747_1700084E18Rik	6.51389	0.248486	0.450226	0.298378	0.584901	0.694382
ENSMUSG00000007476_Lrrc8a	22.0974	-1.06972	0.267689	16.0459	6.182393076516e-05	0.000196319
ENSMUSG00000079484_Phyhd1	1.44062	-0.40446	1.29177	0.094464	0.758577	0.838697
ENSMUSG00000075419_Dolk	280.066	-0.416737	0.0959479	18.819	1.43730734924358e-05	4.95038094572357e-05
ENSMUSG00000052533_Nup188	355.115	-0.192647	0.076958	6.26313	0.0123276	0.0263774
ENSMUSG00000026860_Sh3glb2	541.867	-0.107797	0.122293	0.769891	0.380251	0.499436
ENSMUSG00000026858_Miga2	131.749	-0.381361	0.171959	4.87685	0.0272192	0.0534704
ENSMUSG00000026856_Dolpp1	309.824	-0.145422	0.17695	0.659347	0.416791	0.536257
ENSMUSG00000026853_Crat	580.079	-0.00936933	0.164867	0.00317684	0.955052	0.983954
ENSMUSG00000039515_Ptpa	3536.98	0.787883	0.0524889	222.986	2.01915130189346e-50	6.32370473911634e-49
ENSMUSG00000089762_Ier5l	4650.48	-2.39832	0.169463	176.259	3.17962251804963e-40	7.04316312554713e-39
ENSMUSG00000047363_Cstad	11.5375	-1.95366	0.722322	6.59642	0.0102184	0.0222766
ENSMUSG00000086405_9330198N18Rik	1.97896	-3.41013	2.08124	2.50648	0.113379	0.185821
ENSMUSG00000087268_Gm14486	0.871738	-2.13851	2.79649	0.89894	0.343066	NA
ENSMUSG00000075416_Gm14488	0.708122	-2.00372	3.02937	0.553544	0.456873	NA
ENSMUSG00000044320_1700001O22Rik	15.5364	-2.69394	0.578067	20.067	7.47743730497047e-06	2.66394127926336e-05
ENSMUSG00000026857_Ntmt1	389.876	0.0393411	0.115973	0.114688	0.734869	0.819595
ENSMUSG00000039483_Asb6	798.899	-0.692105	0.121148	31.991	1.54890929504897e-08	7.23743160853332e-08
ENSMUSG00000039476_Prrx2	1.1924	-0.881406	1.93329	0.262756	0.608233	0.715127
ENSMUSG00000050737_Ptges	96.1905	-5.25428	1.06834	10.1382	0.00145224	0.0037544
ENSMUSG00000026848_Tor1b	1133.28	0.610151	0.0451369	182.249	1.56488946692692e-41	3.66229992827696e-40
ENSMUSG00000026849_Tor1a	2315.01	1.04571	0.0815175	160.641	8.19579202232607e-37	1.57719624188678e-35
ENSMUSG00000026851_BC005624	1771.24	-0.0451197	0.0492957	0.837415	0.360137	0.479025
ENSMUSG00000026854_Usp20	422.998	0.012451	0.15448	0.0063804	0.936335	0.971616
ENSMUSG00000075415_Fnbp1	6380.36	1.20828	0.101653	136.244	1.76459903430416e-31	2.88092586801599e-30
ENSMUSG00000087269_D330023K18Rik	31.1785	-0.00378819	0.267829	0.000198673	0.988754	1
ENSMUSG00000000194_Gpr107	1176.06	-0.0728922	0.111957	0.421098	0.51639	0.630945
ENSMUSG00000062661_Ncs1	46.8387	-0.300345	0.278713	1.12567	0.288701	0.402953
ENSMUSG00000055632_Hmcn2	22.7336	0.316811	0.534211	0.291145	0.589487	0.698831
ENSMUSG00000076441_Ass1	980.941	0.996113	0.211926	20.6335	5.56158470680618e-06	2.01129988821423e-05
ENSMUSG00000026843_Fubp3	411.211	0.268465	0.189297	1.97018	0.160428	0.249751
ENSMUSG00000039356_Exosc2	486.668	0.0949053	0.0848141	1.24836	0.263865	0.375353
ENSMUSG00000087549_Gm13427	0.803937	0.608145	1.25861	0.234711	0.628052	NA
ENSMUSG00000026842_Abl1	855.522	-0.427843	0.156379	7.36335	0.00665665	0.015126
ENSMUSG00000043102_Qrfp	53.0162	-4.72397	0.458474	96.548	8.71042434714601e-23	9.84971701839219e-22
ENSMUSG00000026841_Fibcd1	33.6541	-8.40488	0.783611	194.189	3.87318624352683e-44	1.00050351387707e-42
ENSMUSG00000001864_Aif1l	48.0707	0.727871	0.773921	0.708867	0.39982	0.51969
ENSMUSG00000001855_Nup214	1038.32	0.386524	0.0838821	21.1617	4.22105551225927e-06	1.55020063237159e-05
ENSMUSG00000081480_Gm13608	2.40565	1.47984	1.17581	1.00164	0.316914	0.433785
ENSMUSG00000050592_Fam78a	98.4881	-0.854444	0.312541	6.9991	0.00815505	0.0181732
ENSMUSG00000051373_Plpp7	4.55233	-3.20982	1.62776	1.38514	0.239228	0.346634
ENSMUSG00000039262_Prrc2b	782.523	-0.387272	0.152782	6.33018	0.0118701	0.0254803
ENSMUSG00000039254_Pomt1	133.64	0.18257	0.168173	1.16671	0.280079	0.393684
ENSMUSG00000002550_Uck1	629.365	-0.249393	0.077245	10.3901	0.0012669	0.00330917
ENSMUSG00000066068_Gm13611	1.91217	0.598818	0.837264	0.483421	0.486877	0.603787
ENSMUSG00000044627_Swi5	2332.19	0.570157	0.0549909	106.882	4.72442581447507e-25	5.92624800955784e-24
ENSMUSG00000002546_Golga2	720.719	0.133015	0.13389	0.983821	0.321257	0.438384
ENSMUSG00000026825_Dnm1	9.43087	-1.5145	1.09002	0.970887	0.324459	0.441778
ENSMUSG00000039205_Ciz1	991.671	0.0457446	0.0648246	0.497867	0.480439	0.597998
ENSMUSG00000039195_1110008P14Rik	408.586	-0.0628046	0.110563	0.321241	0.570863	0.681813
ENSMUSG00000026822_Lcn2	190.295	-8.0911	0.938588	47.0485	6.92526746020212e-12	4.2530151044439e-11
ENSMUSG00000026820_Ptges2	270.923	-0.182336	0.0922456	3.90131	0.0482486	0.0890067
ENSMUSG00000026819_Slc25a25	1529.46	-0.193799	0.0937148	4.25481	0.0391394	0.0738807
ENSMUSG00000039164_Naif1	381.45	0.53567	0.124227	18.4009	1.78969936869488e-05	6.08751868673908e-05
ENSMUSG00000103175_Gm37169	33.7319	-6.79573	0.803777	83.625	5.98126064559257e-20	5.92636344220953e-19
ENSMUSG00000039157_Fam102a	2895.43	-2.25693	0.110678	378.429	2.73544693447344e-84	2.08056791242271e-82
ENSMUSG00000026810_Dpm2	872.032	-0.0130689	0.0550585	0.0563149	0.812418	0.881668
ENSMUSG00000079442_St6galnac4	961.168	-0.117593	0.07016	2.80802	0.0937939	0.158225
ENSMUSG00000093147_Gm23369	0.951092	0.220743	2.74653	-0.00973632	1	NA
ENSMUSG00000026811_St6galnac6	754.103	-0.731647	0.162873	19.4788	1.01721168149759e-05	3.55717867164099e-05
ENSMUSG00000026817_Ak1	8.12458	-1.89092	0.710661	5.57544	0.0182141	0.0373019
ENSMUSG00000026814_Eng	205.603	-1.27403	0.355677	10.7194	0.0010602	0.00281025
ENSMUSG00000009566_Fpgs	191.774	-0.180637	0.136407	1.74543	0.186453	0.282382
ENSMUSG00000009555_Cdk9	2308.14	-0.110842	0.0796796	1.9316	0.164583	0.255224
ENSMUSG00000059013_Sh2d3c	627.37	-0.667148	0.138234	23.0467	1.58112566538027e-06	6.06229958558583e-06
ENSMUSG00000009551_6330409D20Rik	0.881349	-2.49526	2.5101	1.24367	0.264764	NA
ENSMUSG00000039021_Ttc16	1.96921	-0.91894	2.86669	-0.0106813	1	1
ENSMUSG00000009563_Tor2a	800.819	-0.00746685	0.0602104	0.0153762	0.901315	0.947628
ENSMUSG00000053746_Ptrh1	24.3785	-0.100154	0.268031	0.137297	0.710983	0.800012
ENSMUSG00000038987_Cfap157	3.35799	-0.40096	0.680947	0.316473	0.573735	0.684688
ENSMUSG00000026797_Stxbp1	237.224	-0.340184	0.22915	2.10582	0.14674	0.231544
ENSMUSG00000087496_Gm13523	1.83152	-0.355075	1.42249	0.0973828	0.754993	0.8358
ENSMUSG00000026796_Fam129b	1767.99	-1.7551	0.155109	118.767	1.17779321180336e-27	1.65504123831635e-26
ENSMUSG00000026792_Lrsam1	126.059	0.0115923	0.264009	0.00185384	0.965657	0.990325
ENSMUSG00000038900_Rpl12	2899.96	0.383998	0.156401	5.93596	0.014835	0.0310451
ENSMUSG00000026791_Slc2a8	263.984	-0.618707	0.203636	9.06069	0.00261164	0.00644985
ENSMUSG00000038860_Garnl3	32.9317	0.466719	0.239278	3.7784	0.0519184	0.0947732
ENSMUSG00000104277_Gm38299	1.18287	2.07672	2.04369	1.03745	0.308416	0.424708
ENSMUSG00000038831_Ralgps1	108.608	-0.898093	0.174695	26.0661	3.29929367971971e-07	1.36287849049974e-06
ENSMUSG00000004105_Angptl2	29.3853	-3.02034	0.753724	10.3676	0.00128245	0.00334704
ENSMUSG00000068966_Zbtb34	87.788	0.0553058	0.23425	0.054069	0.816128	0.884595
ENSMUSG00000026788_Zbtb43	479.496	-0.581933	0.0879303	43.4886	4.26440119460904e-11	2.46637832519829e-10
ENSMUSG00000081244_Gm13529	1.07597	1.47713	1.09689	1.75667	0.185041	0.280813
ENSMUSG00000038740_Mvb12b	117.077	-0.339651	0.261846	1.5971	0.206315	0.307117
ENSMUSG00000086904_Gm13404	1.85685	-0.443314	1.44517	0.138975	0.709302	0.798543
ENSMUSG00000038718_Pbx3	193.739	-0.0288306	0.197591	0.0209681	0.884866	0.935169
ENSMUSG00000038696_Mapkap1	1951.29	0.486678	0.0665951	53.1323	3.11815672164091e-13	2.10590943917165e-12
ENSMUSG00000081992_Gm13408	2.16098	0.72076	0.888346	0.613315	0.433543	0.55225
ENSMUSG00000087635_Gm13414	8.04671	0.0266739	0.398405	0.00440292	0.947096	0.978351
ENSMUSG00000026867_Gapvd1	2030.63	-0.200653	0.0836689	5.73336	0.0166456	0.0344058
ENSMUSG00000026864_Hspa5	48876.4	0.0512642	0.128003	0.159164	0.689928	0.78396
ENSMUSG00000070953_Rabepk	216.88	-0.489275	0.168127	8.34811	0.0038609	0.00921567
ENSMUSG00000035949_Fbxw2	1683.39	-0.396892	0.0888507	19.7947	8.62236661503228e-06	3.0463576204668e-05
ENSMUSG00000026869_Psmd5	1016.12	0.0507126	0.0609119	0.691806	0.405551	0.525429
ENSMUSG00000026870_Cutal	0.841806	0.33335	2.20761	0.0259612	0.871995	NA
ENSMUSG00000026873_Phf19	228.212	-0.437602	0.107162	16.6024	4.60919458867287e-05	0.000148378
ENSMUSG00000026875_Traf1	12293.6	0.154533	0.081	3.61557	0.057241	0.103289
ENSMUSG00000083533_Gm13450	18.2631	-0.52439	0.330609	2.48972	0.114592	0.187501
ENSMUSG00000026874_Hc	29.8993	2.83988	0.43589	38.4169	5.71358649576659e-10	3.03358205995452e-09
ENSMUSG00000035875_AI182371	7.03958	-0.940253	0.652019	1.81053	0.178445	0.272704
ENSMUSG00000057110_Cntrl	1649.69	0.272692	0.0512548	28.2358	1.07399288631367e-07	4.66362067330632e-07
ENSMUSG00000026878_Rab14	5336.53	-0.056321	0.059024	0.909959	0.340125	0.458299
ENSMUSG00000026879_Gsn	9795.37	1.34507	0.222118	33.1701	8.44374614600668e-09	4.05211022485003e-08
ENSMUSG00000026880_Stom	3665.33	0.544634	0.121094	19.7987	8.60406766214236e-06	3.04045289233559e-05
ENSMUSG00000075391_Gm13443	0.745851	-0.0677805	1.21875	0.00781139	0.929573	NA
ENSMUSG00000035778_Ggta1	2785.28	0.915991	0.155164	33.6467	6.60872560904338e-09	3.20114843943731e-08
ENSMUSG00000106856_Gm43761	11.1146	2.74758	0.538569	25.9441	3.51454738981237e-07	1.44742865965908e-06
ENSMUSG00000026883_Dab2ip	42.0181	-0.783534	0.409121	3.62607	0.0568811	0.102698
ENSMUSG00000026885_Ttll11	19.0941	-2.43909	0.568092	16.8989	3.94250267213093e-05	0.000127883
ENSMUSG00000026895_Ndufa8	1546.24	0.17648	0.0812122	4.70007	0.0301614	0.0585361
ENSMUSG00000026890_Lhx6	2.81868	0.599204	1.96668	0.048484	0.825723	0.891741
ENSMUSG00000026889_Rbm18	1242.25	-0.757737	0.0575708	172.007	2.69625662066975e-39	5.78066562062384e-38
ENSMUSG00000026887_Mrrf	237.247	0.607421	0.107722	31.5889	1.90510877136372e-08	8.82223237997789e-08
ENSMUSG00000087187_Gm13431	0.670422	-0.801732	2.3722	0.194372	0.659302	NA
ENSMUSG00000047250_Ptgs1	72.4437	-2.17981	0.353078	33.6816	6.49127974687459e-09	3.14664539474824e-08
ENSMUSG00000083716_Gm13436	32.3855	0.433987	0.226741	3.64606	0.0562021	0.101622
ENSMUSG00000009030_Pdcl	722.497	-0.293365	0.113488	6.64714	0.00993149	0.0217302
ENSMUSG00000075376_Rc3h2	503.937	0.0937542	0.111294	0.702974	0.401786	0.52158
ENSMUSG00000066798_Zbtb6	263.062	0.157098	0.117676	1.77331	0.182974	0.278293
ENSMUSG00000050714_Zbtb26	42.2434	0.561795	0.564965	0.929127	0.33509	0.45313
ENSMUSG00000035437_Rabgap1	861.505	-0.63964	0.146575	18.6567	1.56493925607308e-05	5.36394683854663e-05
ENSMUSG00000026915_Strbp	1176.98	1.19482	0.159928	52.9949	3.34412976791932e-13	2.25296784751176e-12
ENSMUSG00000053164_Gpr21	0.755117	1.04721	2.10361	0.322698	0.569991	NA
ENSMUSG00000035392_Dennd1a	838.47	-1.35355	0.137758	92.3499	7.26292929747451e-22	7.91415475835059e-21
ENSMUSG00000107586_Gm44283	2.54545	-1.32205	1.28175	0.478582	0.489065	0.605981
ENSMUSG00000108155_Gm44443	0.937624	1.07072	3.01872	0.295935	0.586442	NA
ENSMUSG00000107529_Gm44291	3.67175	0.804108	0.967547	0.539763	0.462531	0.580306
ENSMUSG00000000247_Lhx2	17.6874	-6.00059	0.874295	49.7256	1.76826746791423e-12	1.13580370501046e-11
ENSMUSG00000085950_Gm13589	3.02995	2.90949	1.89377	2.02453	0.154777	0.242212
ENSMUSG00000084124_Gm13588	1.62222	0.03922	0.911649	0.00175883	0.966548	0.990676
ENSMUSG00000026749_Nek6	2284.48	2.7378	0.147286	300.592	2.44794164552266e-67	1.20306916717264e-65
ENSMUSG00000108210_Gm44179	0.748597	1.13289	2.18591	0.296436	0.586125	NA
ENSMUSG00000026750_Psmb7	1302.12	0.644023	0.0784351	66.8122	2.98648215986506e-16	2.43272008321859e-15
ENSMUSG00000082931_Gm13586	1.9669	-1.17864	0.923502	1.43517	0.230922	0.337148
ENSMUSG00000063972_Nr6a1	16.2116	0.875581	0.573693	1.96658	0.160811	0.250204
ENSMUSG00000107468_5730507A11Rik	0.905476	0.853773	1.51657	0.4212	0.516339	NA
ENSMUSG00000046618_Olfml2a	3.24634	-0.255743	1.79579	0.0346228	0.852388	0.910941
ENSMUSG00000035295_Wdr38	4.54	-0.167935	0.556639	0.0897534	0.764491	0.843276
ENSMUSG00000062997_Rpl35	2230.49	0.560204	0.105822	27.727	1.39696288588104e-07	6.0102329144067e-07
ENSMUSG00000026755_Arpc5l	1669.91	1.23398	0.0794327	234.473	6.3075154257725e-53	2.09525386769119e-51
ENSMUSG00000026754_Golga1	229.994	0.102705	0.211689	0.225913	0.634571	0.737579
ENSMUSG00000035236_Scai	105.382	0.214511	0.147514	2.10344	0.146968	0.231781
ENSMUSG00000082315_Gm16523	1.73916	-0.430505	2.39745	0.00396101	0.949817	0.980404
ENSMUSG00000107955_Gm44027	1.99076	1.48265	1.90994	0.55948	0.45447	0.572478
ENSMUSG00000026753_Ppp6c	2446.01	-0.172288	0.0593321	8.41116	0.00372924	0.00893145
ENSMUSG00000083240_Gm13453	2.4775	0.899955	0.875388	0.921104	0.337185	0.455065
ENSMUSG00000082536_Gm13456	15.1301	0.639193	0.309288	4.1933	0.0405841	0.0764046
ENSMUSG00000081999_Gm13461	10.6538	0.707746	0.369294	3.59571	0.0579289	0.104422
ENSMUSG00000080994_Gm13464	4.68183	0.114054	0.589437	0.036585	0.848312	0.907901
ENSMUSG00000026866_Kynu	680.771	1.69367	0.271102	33.8479	5.95925939378797e-09	2.89313892605709e-08
ENSMUSG00000049744_Arhgap15	2726.14	0.233592	0.0884802	6.92189	0.00851468	0.0189087
ENSMUSG00000085089_Arhgap15os	0.78983	-2.35494	2.21753	1.56191	0.211385	NA
ENSMUSG00000036890_Gtdc1	97.2636	-0.211852	0.272171	0.563753	0.452752	0.570539
ENSMUSG00000083849_Gm13477	3.13051	-0.468518	1.14304	0.0903717	0.763705	0.842643
ENSMUSG00000026872_Zeb2	2012.09	-1.61973	0.12237	165.335	7.73016545189845e-38	1.5596219075425e-36
ENSMUSG00000052248_Zeb2os	27.3045	-1.68233	0.431334	14.21	0.000163497	0.000489496
ENSMUSG00000098320_Vis1	4.55519	-1.53481	0.696536	4.494	0.034014	0.0652272
ENSMUSG00000085591_Gm13479	0.661207	-1.85644	3.03106	0.477054	0.48976	NA
ENSMUSG00000086644_Gm13470	1.42758	-3.30151	1.81999	3.35444	0.067024	0.118598
ENSMUSG00000052155_Acvr2a	654.31	-1.7799	0.270862	38.0297	6.96759649390389e-10	3.66990717226315e-09
ENSMUSG00000026761_Orc4	1137.68	0.185636	0.0836945	4.91483	0.0266272	0.0524471
ENSMUSG00000036792_Mbd5	191.596	-0.233312	0.251642	0.82596	0.363443	0.482451
ENSMUSG00000081272_Gm13509	53.7929	0.114484	0.168895	0.458319	0.498411	0.614462
ENSMUSG00000069495_Epc2	164.628	-0.826253	0.110716	55.496	9.36508129346927e-14	6.54156389037629e-13
ENSMUSG00000026764_Kif5c	19.0602	-0.689311	0.694146	0.824146	0.363971	0.483051
ENSMUSG00000026765_Lypd6b	11.6747	-3.70616	0.89709	12.7176	0.000362221	0.00103268
ENSMUSG00000026766_Mmadhc	1151.41	-0.114458	0.0678332	2.845	0.0916586	0.155141
ENSMUSG00000017144_Rnd3	1484.88	1.07795	0.12601	70.7602	4.0339240645549e-17	3.46097683730187e-16
ENSMUSG00000087701_Gm13493	8.4664	-0.0271112	0.413612	0.00421817	0.948216	0.979069
ENSMUSG00000036249_Rbm43	387.654	-1.32012	0.10691	148.967	2.91532761371663e-34	5.25169965903259e-33
ENSMUSG00000026946_Nmi	1565.47	-0.534685	0.0993224	28.7971	8.0370016548552e-08	3.52990858658592e-07
ENSMUSG00000053475_Tnfaip6	222.643	-2.48885	0.330043	49.6639	1.82471556280435e-12	1.16931872926349e-11
ENSMUSG00000036202_Rif1	876.989	0.108289	0.106595	1.02304	0.3118	0.428314
ENSMUSG00000026950_Neb	12.3739	-3.34356	0.930312	9.18761	0.00243659	0.00606207
ENSMUSG00000036093_Arl5a	3259.52	0.531962	0.0615033	74.2999	6.71058031339482e-18	5.99634931780133e-17
ENSMUSG00000017412_Cacnb4	12.3364	0.37992	0.491748	0.552597	0.457259	0.575197
ENSMUSG00000025201_Bloc1s2-ps	11.1197	1.28613	0.369737	12.1173	0.000499566	0.00139417
ENSMUSG00000055371_Stam2	1209.91	-0.351446	0.0564974	38.6239	5.1384874981097e-10	2.73657654560346e-09
ENSMUSG00000036053_Fmnl2	350.027	3.92662	0.272412	166.222	4.94812617964505e-38	1.00894398388571e-36
ENSMUSG00000061136_Prpf40a	3516.28	0.041313	0.0665678	0.384609	0.535147	0.648489
ENSMUSG00000026960_Arl6ip6	662.148	0.389046	0.0796769	23.7707	1.08524703560962e-06	4.24162518995303e-06
ENSMUSG00000075334_Rprm	4.4684	-5.32586	0.95544	32.0859	1.47501374713095e-08	6.90730234333225e-08
ENSMUSG00000026824_Kcnj3	1.21914	-2.13559	3.01606	0.472066	0.492038	0.608622
ENSMUSG00000026826_Nr4a2	24997.9	1.33237	0.0998674	170.397	6.05868811310499e-39	1.27611950619652e-37
ENSMUSG00000054181_A930012O16Rik	29.5255	1.11254	0.428071	6.53842	0.0105569	0.0229493
ENSMUSG00000026827_Gpd2	5357.31	1.70994	0.0971921	291.575	2.2561291222406e-65	1.0547128508777e-63
ENSMUSG00000081642_Gm13532	0.817791	0.255631	1.39607	0.0534406	0.817181	NA
ENSMUSG00000026832_Cytip	29775.3	0.757017	0.0862662	75.5785	3.51162786827695e-18	3.18992281285612e-17
ENSMUSG00000086862_Gm13546	224.519	1.93982	0.189788	96.7705	7.78459564571088e-23	8.82361589245064e-22
ENSMUSG00000026834_Acvr1c	6.46855	1.73755	1.17372	0.997754	0.317855	0.434669
ENSMUSG00000026836_Acvr1	110.389	0.835968	0.244877	10.9882	0.000916919	0.00245558
ENSMUSG00000026839_Upp2	9.49873	0.813642	0.418612	3.70561	0.05423	0.0984585
ENSMUSG00000036641_Ccdc148	19.3453	-3.02969	0.576198	24.757	6.50310055220217e-07	2.6011045134403e-06
ENSMUSG00000026991_Pkp4	254.034	-1.78389	0.161109	115.799	5.26060936530894e-27	7.21245348389674e-26
ENSMUSG00000026989_Dapl1	56.8557	-0.927054	0.368329	5.8723	0.015381	0.0320497
ENSMUSG00000035168_Tanc1	270.388	-0.687937	0.184987	13.4019	0.000251363	0.000734097
ENSMUSG00000026988_Wdsub1	360.419	1.27008	0.180984	46.5428	8.96406968024533e-12	5.4648321743404e-11
ENSMUSG00000026987_Baz2b	2164.4	0.793336	0.108209	52.5243	4.24947971251809e-13	2.84789432342077e-12
ENSMUSG00000085975_Gm13572	4.38337	-0.647681	0.732393	0.766895	0.381179	0.500401
ENSMUSG00000087181_Gm13570	0.832035	2.87869	2.04363	2.50093	0.113779	NA
ENSMUSG00000086603_Gm13620	5.67263	-0.55579	0.562875	0.901564	0.342363	0.460672
ENSMUSG00000026977_March7	3898.51	0.181388	0.0464576	15.2282	9.526790948415e-05	0.000295135
ENSMUSG00000060703_Cd302	1182.79	-1.08522	0.174111	36.7455	1.34603842973875e-09	6.92047172285479e-09
ENSMUSG00000080198_Gm13573	3.10277	0.14082	0.886045	0.0205078	0.886128	0.936098
ENSMUSG00000026980_Ly75	2121.81	2.32786	0.157087	195.538	1.96596066389317e-44	5.1618586362795e-43
ENSMUSG00000086196_Gm13571	8.48087	4.19466	0.976945	12.6914	0.000367332	0.00104647
ENSMUSG00000054580_Pla2r1	3.03421	2.57562	1.52999	2.74457	0.0975853	0.16377
ENSMUSG00000026970_Rbms1	4667.55	-0.199829	0.0594666	11.2617	0.000791242	0.00213994
ENSMUSG00000064289_Tank	4477.06	0.102373	0.0933227	1.2015	0.273021	0.385658
ENSMUSG00000026914_Psmd14	3388.03	0.400353	0.061832	41.6901	1.06949006344517e-10	6.01141233022101e-10
ENSMUSG00000035000_Dpp4	6477.33	2.00843	0.198493	91.0669	1.38893131095028e-21	1.49057370867771e-20
ENSMUSG00000087518_Gm13561	23.7531	3.26568	0.471845	42.637	6.59000983457162e-11	3.76485002978343e-10
ENSMUSG00000087681_Gm13565	2.06024	4.40327	1.80912	5.82387	0.0158101	0.0328598
ENSMUSG00000087422_Gm13564	4.02948	1.76118	0.695203	6.17695	0.0129425	0.0275234
ENSMUSG00000000394_Gcg	4.88886	2.0496	0.643784	10.1411	0.00145003	0.0037502
ENSMUSG00000000392_Fap	26.0869	2.10198	0.303521	47.8901	4.5079580988177e-12	2.80988724813135e-11
ENSMUSG00000026896_Ifih1	1274.67	-0.791532	0.264824	8.17372	0.00425017	0.0100646
ENSMUSG00000026893_Gca	801.437	0.507377	0.068671	54.3969	1.63820615344885e-13	1.12462383034219e-12
ENSMUSG00000059742_Kcnh7	14.307	0.254447	0.79362	0.101191	0.750406	0.832206
ENSMUSG00000082127_Gm13577	30.4794	0.0808561	0.212825	0.143927	0.704407	0.794853
ENSMUSG00000084104_Gm13578	3.28399	0.745437	0.787832	0.86355	0.352747	0.47172
ENSMUSG00000026888_Grb14	1.09239	1.38437	2.67536	0.180368	0.671057	0.768527
ENSMUSG00000034903_Cobll1	280.584	-2.86501	0.23528	127.282	1.61205555897037e-29	2.46201345807052e-28
ENSMUSG00000086881_Gm13594	2.44562	-0.370053	1.09403	0.0903526	0.763729	0.842643
ENSMUSG00000061171_Slc38a11	0.863432	-1.11895	3.02103	0.12963	0.718816	NA
ENSMUSG00000057182_Scn3a	88.3915	3.72141	0.479524	49.0899	2.44496445241803e-12	1.55122918435937e-11
ENSMUSG00000026994_Galnt3	72.1806	-0.859437	0.253381	11.219	0.000809636	0.0021866
ENSMUSG00000034848_Ttc21b	124.451	0.0278569	0.3413	0.00660325	0.935235	0.971001
ENSMUSG00000034780_B3galt1	5.3764	0.611986	1.43924	0.176632	0.674284	0.771168
ENSMUSG00000027030_Stk39	417.634	-2.62478	0.131887	367.703	5.92055535879553e-82	4.29845774856189e-80
ENSMUSG00000075312_Gm13597	0.861709	0.198558	1.45394	0.0256455	0.872769	NA
ENSMUSG00000027035_Cers6	1683.82	-0.861648	0.102529	69.6642	7.03096812109325e-17	5.94191208011439e-16
ENSMUSG00000103734_Gm37651	5.68202	-1.03228	1.36978	0.679882	0.409627	0.529172
ENSMUSG00000104262_Gm37747	1.1572	-0.270915	2.96813	0.000641278	0.979797	0.998689
ENSMUSG00000103546_Gm37666	7.18481	-1.2509	0.731438	2.67087	0.1022	0.1701
ENSMUSG00000102662_Gm38377	2.1115	-4.11865	1.68437	5.77297	0.0162745	0.0337044
ENSMUSG00000034738_Nostrin	645.802	1.11774	0.122841	80.3629	3.11587979851156e-19	2.9653459830224e-18
ENSMUSG00000005233_Spc25	303.077	1.43214	0.145945	93.5956	3.87040226314494e-22	4.27820070228945e-21
ENSMUSG00000027068_Dhrs9	147.668	2.29133	0.308078	47.9373	4.40075621314661e-12	2.74395882685039e-11
ENSMUSG00000063145_Bbs5	136.404	1.38805	0.322533	16.3456	5.27785375039224e-05	0.000168939
ENSMUSG00000075307_Klhl41	29.7845	-1.45202	0.579001	4.99028	0.0254901	0.0504719
ENSMUSG00000027086_Fastkd1	234.809	0.959434	0.21803	18.1541	2.03734450867034e-05	6.87254174545662e-05
ENSMUSG00000042133_Ppig	2683.02	-0.449552	0.033641	178.203	1.19636176402974e-40	2.70728051135278e-39
ENSMUSG00000082345_Gm13622	3.48263	-1.02349	0.726616	1.88811	0.169415	0.261435
ENSMUSG00000070883_Ccdc173	10.6561	-1.2873	0.755015	2.27583	0.131405	0.210765
ENSMUSG00000027088_Phospho2	706.211	0.170397	0.0946647	3.23394	0.0721272	0.126356
ENSMUSG00000042155_Klhl23	36.0529	6.03891	1.03182	18.8264	1.43168484011435e-05	4.93278866267692e-05
ENSMUSG00000068882_Ssb	3488.26	-0.00459379	0.0567158	0.006559	0.935452	0.971001
ENSMUSG00000051730_Mettl5	198.071	0.284635	0.0970095	8.5938	0.0033731	0.00816007
ENSMUSG00000085735_Mettl5os	3.94275	2.07872	0.705625	8.59653	0.00336804	0.00814885
ENSMUSG00000044308_Ubr3	632.371	-0.0601764	0.133623	0.199337	0.655257	0.755493
ENSMUSG00000042064_Myo3b	50.865	-4.3226	0.753774	26.0306	3.3604760346298e-07	1.38695616183784e-06
ENSMUSG00000047965_Rpl9-ps7	1.64618	-0.282076	0.908302	0.10816	0.742248	0.825177
ENSMUSG00000075304_Sp5	4.16398	-2.6249	2.03461	1.85603	0.173083	0.266123
ENSMUSG00000075302_Erich2	0.86469	0.991533	3.02534	0.101676	0.749827	NA
ENSMUSG00000070880_Gad1	3.31361	-0.19709	2.84549	0.00021514	0.988297	1
ENSMUSG00000097025_Gm26558	19.1434	-0.79356	0.31682	6.13035	0.0132881	0.0281762
ENSMUSG00000014959_Gorasp2	3128.86	0.2961	0.057366	26.5684	2.54373297894068e-07	1.06616509965791e-06
ENSMUSG00000041997_Tlk1	839.074	-0.260121	0.0965047	7.25302	0.00707818	0.0159929
ENSMUSG00000041975_Mettl8	138.859	-0.408721	0.134046	9.2335	0.00237626	0.00592736
ENSMUSG00000041966_Dcaf17	331.719	0.373911	0.107755	11.9865	0.00053587	0.00148855
ENSMUSG00000027015_Cybrd1	2.83668	-2.88113	2.58385	0.948604	0.330075	0.447612
ENSMUSG00000027012_Dync1i2	1011.98	0.0764405	0.0861876	0.781988	0.376534	0.495743
ENSMUSG00000027010_Slc25a12	1548.92	0.424818	0.12175	11.9578	0.000544181	0.00151055
ENSMUSG00000027018_Hat1	2351.81	0.505361	0.0733354	47.0769	6.82537751200316e-12	4.1970487896235e-11
ENSMUSG00000041921_Metap1d	297.849	-0.745106	0.204884	13.0059	0.000310505	0.000893207
ENSMUSG00000084946_Dlx1as	2.19889	-1.80611	0.842696	4.7668	0.0290137	0.0565493
ENSMUSG00000023391_Dlx2	12.9258	-6.28615	1.33418	16.2657	5.50525241142409e-05	0.000175865
ENSMUSG00000027111_Itga6	390.559	0.419988	0.251763	2.58045	0.108191	0.178629
ENSMUSG00000006494_Pdk1	781.534	-0.659685	0.0964966	46.2504	1.04063832560413e-11	6.31999834817945e-11
ENSMUSG00000049044_Rapgef4	47.2003	-5.02165	0.426506	155.076	1.34791225387024e-35	2.52299161815732e-34
ENSMUSG00000004085_Map3k20	320.961	0.937748	0.171422	29.3172	6.14471197298754e-08	2.72062126094368e-07
ENSMUSG00000055612_Cdca7	394.298	1.06088	0.118841	78.1812	9.40070060270311e-19	8.78085908635529e-18
ENSMUSG00000027109_Sp3	2012.64	-1.18768	0.0351793	1133.48	1.74319843830868e-248	1.19328158810937e-245
ENSMUSG00000063714_Sp3os	96.6105	-0.225804	0.172996	1.68903	0.193729	0.291803
ENSMUSG00000027108_Ola1	969.936	0.321186	0.0940269	11.5965	0.000660752	0.00181104
ENSMUSG00000082455_Gm13665	1.08437	-3.06662	3.00295	1.42189	0.233093	0.339542
ENSMUSG00000041777_Cir1	159.607	-0.43895	0.124325	12.3804	0.000433859	0.00122058
ENSMUSG00000008226_Scrn3	146.983	-0.0930693	0.283371	0.106876	0.74373	0.826694
ENSMUSG00000041762_Gpr155	138.938	-0.206543	0.180184	1.30282	0.253698	0.363616
ENSMUSG00000085768_Gm13707	1.13639	1.45231	3.01773	0.222187	0.637379	0.739909
ENSMUSG00000075284_Wipf1	2839.88	0.545308	0.164886	10.6157	0.00112133	0.00295674
ENSMUSG00000086069_Gm13708	2.55057	2.95103	1.06494	6.50864	0.0107352	0.0232814
ENSMUSG00000056486_Chn1	3.17964	-2.25033	1.30685	1.35031	0.245225	0.353746
ENSMUSG00000027104_Atf2	1099.67	-0.0971128	0.116718	0.69006	0.406144	0.525984
ENSMUSG00000018770_Atp5g3	5517.44	0.348494	0.0570276	37.2057	1.06301431234978e-09	5.530617623455e-09
ENSMUSG00000009207_Lnpk	538.117	0.36029	0.112288	10.269	0.00135284	0.00351735
ENSMUSG00000075279_Mrpl23-ps1	15.604	-0.325027	0.30502	1.12311	0.28925	0.403615
ENSMUSG00000050368_Hoxd10	1.5277	-2.71522	2.84969	0.866934	0.351805	0.470851
ENSMUSG00000043342_Hoxd9	2.74777	-2.14152	1.44643	0.250873	0.616461	0.722762
ENSMUSG00000027102_Hoxd8	3.35168	-1.58908	1.39033	0.408104	0.522934	0.637276
ENSMUSG00000079277_Hoxd3	1.5013	-3.51388	1.46669	6.15392	0.0131121	0.0278563
ENSMUSG00000075277_Haglr	2.35147	-3.35905	2.04614	2.36885	0.123778	0.200495
ENSMUSG00000042448_Hoxd1	10.9635	-6.67147	0.824121	85.3505	2.49895625207045e-20	2.50640996773597e-19
ENSMUSG00000027099_Mtx2	942.423	0.507394	0.110526	20.7606	5.20415786871573e-06	1.88916844450141e-05
ENSMUSG00000100303_2600014E21Rik	1.24787	-2.61041	3.00971	0.788251	0.37463	0.493643
ENSMUSG00000081406_Rps6-ps4	55.6799	0.509094	0.228601	4.88514	0.0270888	0.0532633
ENSMUSG00000059005_Hnrnpa3	1754.2	0.0844577	0.0790643	1.13707	0.286273	0.400517
ENSMUSG00000015839_Nfe2l2	14406	0.18503	0.19089	0.892011	0.344933	0.46338
ENSMUSG00000089015_Gm24996	5.18079	-0.973641	0.597613	2.54376	0.110731	0.182085
ENSMUSG00000087222_E030042O20Rik	8.62535	0.651602	1.16107	0.161379	0.68789	0.782201
ENSMUSG00000086813_Gm13657	4.34319	0.784147	0.687504	1.207	0.271928	0.384312
ENSMUSG00000042410_Agps	2001.02	-0.186111	0.0782843	5.63844	0.0175709	0.0361237
ENSMUSG00000075273_Ttc30b	19.4069	1.54937	0.474884	9.29406	0.00229898	0.00575584
ENSMUSG00000075271_Ttc30a1	17.0093	2.25618	0.775723	7.17692	0.00738475	0.0166228
ENSMUSG00000075270_Pde11a	37.536	-8.53794	0.761036	267.627	3.73319881289719e-60	1.52243024780426e-58
ENSMUSG00000042369_Rbm45	51.0895	0.327603	0.275115	1.35275	0.244798	0.353343
ENSMUSG00000042359_Osbpl6	22.3346	-2.74369	0.580078	19.9211	8.07058930343706e-06	2.86302026983117e-05
ENSMUSG00000002731_Prkra	694.012	2.20596	0.152469	190.551	2.41051872976626e-43	6.0474361902395e-42
ENSMUSG00000075267_Dfnb59	26.4321	3.84156	0.473164	61.1309	5.34038094086761e-15	4.04261775251222e-14
ENSMUSG00000002732_Fkbp7	72.9752	-0.15207	0.19493	0.601375	0.438054	0.556481
ENSMUSG00000002733_Plekha3	1348.16	-0.24356	0.0677505	12.8896	0.000330415	0.000947353
ENSMUSG00000051747_Ttn	307.719	-7.04397	0.822769	39.0289	4.17585983021728e-10	2.23821883013911e-09
ENSMUSG00000044033_Ccdc141	1.32923	0.68303	1.52801	0.232897	0.629384	0.733039
ENSMUSG00000042272_Sestd1	945.958	-0.412678	0.123553	11.0234	0.0008997	0.00241183
ENSMUSG00000081611_Gm13651	0.808545	-0.145728	1.33667	0.0156889	0.900321	NA
ENSMUSG00000027014_Cwc22	548.941	0.0646889	0.0811776	0.63314	0.426206	0.545457
ENSMUSG00000027011_Ube2e3	1801.62	0.719322	0.0738557	93.7024	3.66707464030542e-22	4.05813046366825e-21
ENSMUSG00000102286_Gm37004	1.00408	-3.33603	2.14083	3.04613	0.08093	NA
ENSMUSG00000027009_Itga4	3334.32	0.504898	0.0601723	69.9643	6.0386626934508e-17	5.11910870611992e-16
ENSMUSG00000075256_Cerkl	39.8864	-0.120315	0.304264	0.151569	0.69704	0.789144
ENSMUSG00000081284_Gm13673	1.5478	-1.15497	1.62441	0.708932	0.399799	0.51969
ENSMUSG00000027007_Ssfa2	3943.22	0.701798	0.189874	12.891	0.00033017	0.000946793
ENSMUSG00000059173_Pde1a	4.83666	-0.507899	1.02533	0.348793	0.554797	0.667156
ENSMUSG00000027006_Dnajc10	2445.42	0.395435	0.118902	10.9456	0.000938245	0.00250744
ENSMUSG00000027004_Frzb	2.76854	-1.24812	2.29489	-0.147197	1	1
ENSMUSG00000027002_Nckap1	178.881	-1.51278	0.269671	28.7789	8.11291589964107e-08	3.56243434246095e-07
ENSMUSG00000027001_Dusp19	59.2696	0.501759	0.274845	3.1533	0.0757735	0.131768
ENSMUSG00000026999_Nup35	99.6973	-1.51485	0.217551	45.8984	1.24549194074043e-11	7.50230799125452e-11
ENSMUSG00000064193_Gm4735	3.04536	-1.24827	0.661851	3.58521	0.0582961	0.105039
ENSMUSG00000081400_Gm13680	5.31023	0.223128	0.569666	0.151229	0.697364	0.789381
ENSMUSG00000027091_Zc3h15	1865.05	-0.401712	0.106035	14.1648	0.000167477	0.000500551
ENSMUSG00000027087_Itgav	1396.25	-1.14583	0.168705	43.8995	3.45682450615872e-11	2.01818322599891e-10
ENSMUSG00000085335_Gm13684	14.3385	-1.43604	0.391331	13.1858	0.000282082	0.000817209
ENSMUSG00000048388_Fam171b	15.1387	-2.40172	0.968029	3.33731	0.0677252	0.119673
ENSMUSG00000059588_Calcrl	490.297	0.251764	0.212249	1.34089	0.246878	0.355809
ENSMUSG00000027082_Tfpi	69.6826	-2.38298	0.275023	70.5607	4.46319665632451e-17	3.81902188891838e-16
ENSMUSG00000087362_Gm13710	76.0053	1.985	0.491528	12.3017	0.000452551	0.00126906
ENSMUSG00000034101_Ctnnd1	52.6595	0.160676	0.334429	0.215567	0.642438	0.744565
ENSMUSG00000076437_Selenoh	736.44	0.858578	0.104182	66.9334	2.80833465078213e-16	2.2924765865222e-15
ENSMUSG00000050043_Tmx2	521.523	-0.615813	0.171595	12.4593	0.000415913	0.00117371
ENSMUSG00000027080_Med19	335.777	0.147571	0.0933465	2.49065	0.114525	0.187406
ENSMUSG00000034075_Zdhhc5	2054.89	-0.758266	0.0830408	82.5333	1.03905129633179e-19	1.0155785923912e-18
ENSMUSG00000027079_Clp1	1369.1	-0.821326	0.0965165	71.203	3.22303946435131e-17	2.78521178598835e-16
ENSMUSG00000034059_Ypel4	8.65406	-1.54913	0.959853	2.40802	0.120715	0.196163
ENSMUSG00000023224_Serping1	141.377	-0.391732	0.368923	1.07454	0.299923	0.415333
ENSMUSG00000027078_Ube2l6	3558.25	0.522683	0.176484	8.53992	0.00347442	0.00838084
ENSMUSG00000027076_Timm10	224.028	0.342116	0.128153	7.08034	0.00779341	0.0174281
ENSMUSG00000027075_Slc43a1	7.71801	-1.47096	1.1172	1.52373	0.217055	0.320023
ENSMUSG00000050896_Rtn4rl2	5.13966	2.33191	1.27503	1.85715	0.172955	0.265968
ENSMUSG00000027074_Slc43a3	198.897	0.656234	0.165851	15.3838	8.77361070497225e-05	0.000273615
ENSMUSG00000027073_Prg2	179.116	-3.35912	0.844788	11.2316	0.000804143	0.00217207
ENSMUSG00000027072_Prg3	46.0808	-2.02824	0.295909	44.9248	2.04752718180346e-11	1.21614358517592e-10
ENSMUSG00000027071_P2rx3	1.31557	-2.0638	1.73128	0.821758	0.364667	0.483707
ENSMUSG00000027067_Ssrp1	4389.43	0.0463785	0.04513	1.05483	0.304397	0.420313
ENSMUSG00000033955_Tnks1bp1	126.188	-2.26358	0.186311	140.093	2.54044886081139e-32	4.25264483101938e-31
ENSMUSG00000044338_Aplnr	91.5547	-4.60797	1.3293	7.53142	0.0060632	0.013901
ENSMUSG00000082534_Gm13712	1.1028	-2.61808	1.63099	2.6671	0.102443	0.170445
ENSMUSG00000085135_Gm13713	7.0229	-2.45899	0.608539	16.4921	4.88532254789891e-05	0.000157004
ENSMUSG00000045392_Olfr1033	2.49098	-3.30446	1.10739	7.59774	0.00584417	0.0134359
ENSMUSG00000082028_Gm1826	0.937896	0.716518	1.24508	0.371891	0.541975	NA
ENSMUSG00000082908_Gm13736	2.72449	0.01866	0.623973	0.000891305	0.976183	0.996458
ENSMUSG00000075072_Olfr48	2.70986	-3.12567	2.50813	1.22409	0.26856	0.380563
ENSMUSG00000049149_Olfr1258	1.39114	-3.56907	1.539	5.87834	0.0153282	0.0319622
ENSMUSG00000068806_Olfr1259	0.802802	-1.96188	3.0263	0.459104	0.498043	NA
ENSMUSG00000025314_Ptprj	1097.74	0.223209	0.11671	3.63294	0.0566466	0.102332
ENSMUSG00000085471_4933423P22Rik	18.473	4.18592	0.487146	86.7522	1.23008458414706e-20	1.25409740555036e-19
ENSMUSG00000051329_Nup160	1079.09	0.687444	0.111607	37.5152	9.07024188117762e-10	4.74220747781046e-09
ENSMUSG00000008200_Fnbp4	1661.89	-0.0249088	0.119033	0.043245	0.835265	0.899241
ENSMUSG00000040812_Agbl2	19.6667	5.87997	1.24093	16.6402	4.51821742886917e-05	0.000145694
ENSMUSG00000027282_Mtch2	2039.87	0.342396	0.0761697	20.0688	7.4705651113343e-06	2.66248273501198e-05
ENSMUSG00000040794_C1qtnf4	18.0924	-1.53413	0.321923	22.6146	1.97979314273127e-06	7.52761260994449e-06
ENSMUSG00000005510_Ndufs3	1024.8	-0.0686992	0.0497948	1.90319	0.167721	0.259323
ENSMUSG00000005505_Kbtbd4	126.515	-0.338543	0.174619	3.7329	0.0533507	0.0970183
ENSMUSG00000063235_Ptpmt1	395.022	0.75489	0.151133	24.2222	8.58350052454872e-07	3.39146474034272e-06
ENSMUSG00000005506_Celf1	1927.98	-0.00807078	0.0866163	0.00865781	0.925866	0.964356
ENSMUSG00000002104_Rapsn	43.2007	-2.18885	0.34832	35.8348	2.14775259315642e-09	1.08369073583296e-08
ENSMUSG00000086495_Gm13778	1.03114	-2.48312	2.20445	1.1065	0.292844	0.407799
[truncated: 18,352 more rows]

## Sheet: 3
	baseMean	log2FoldChange	lfcSE	stat	pvalue	padj
ENSMUSG00000098104_Gm6085	17.7726	-0.226843	0.289876	0.607572	0.435704	0.602341
ENSMUSG00000103922_Gm6123	2.20414	0.477595	1.16756	0.104324	0.746701	0.855164
ENSMUSG00000033845_Mrpl15	1060.84	0.105017	0.05991	3.06943	0.0797774	0.174811
ENSMUSG00000102275_Gm37144	0.968497	-0.219223	1.53332	0.0420113	0.837598	NA
ENSMUSG00000025903_Lypla1	2096.04	0.247314	0.0898855	7.51463	0.00611998	0.0218612
ENSMUSG00000033813_Tcea1	927.194	0.136848	0.0640292	4.56175	0.0326936	0.0866036
ENSMUSG00000102653_Gm37079	1.50171	-2.14528	2.29723	0.866399	0.351954	NA
ENSMUSG00000033793_Atp6v1h	3593.36	0.0260143	0.0707693	0.134858	0.713447	0.831801
ENSMUSG00000025907_Rb1cc1	1211.16	-0.335893	0.11435	8.60016	0.00336134	0.0131591
ENSMUSG00000090031_4732440D04Rik	30.3353	-0.836758	0.285353	8.39452	0.00376354	0.0144946
ENSMUSG00000103845_Gm19026	0.810795	0.725937	3.01963	0.0184093	0.892074	NA
ENSMUSG00000033740_St18	7.62563	0.752165	1.07128	0.175858	0.674957	0.803779
ENSMUSG00000102135_Gm37108	0.813735	1.1718	1.19713	1.05022	0.305457	NA
ENSMUSG00000051285_Pcmtd1	777.64	-0.246903	0.101297	5.89371	0.015195	0.04657
ENSMUSG00000103509_Gm38372	2.17954	1.49663	1.63671	0.912205	0.33953	0.50593
ENSMUSG00000097797_Gm26901	2.44525	2.01132	1.07878	3.30252	0.0691735	0.156448
ENSMUSG00000103933_Gm36964	1.49047	1.83685	1.49232	0.914669	0.338879	NA
ENSMUSG00000061024_Rrs1	829.42	-0.546712	0.0726599	56.3111	6.18643784454184e-14	2.56262191895739e-12
ENSMUSG00000025911_Adhfe1	4.89074	0.605701	0.706148	0.671484	0.412535	0.579015
ENSMUSG00000079671_2610203C22Rik	6.13413	1.86996	0.898682	2.79614	0.0944917	0.198544
ENSMUSG00000025912_Mybl1	3.8447	2.61161	0.904903	8.69247	0.00319528	0.0126268
ENSMUSG00000045210_Vcpip1	1248.31	-0.114406	0.0905152	1.58958	0.207386	0.358251
ENSMUSG00000097893_1700034P13Rik	3.59081	0.0725805	1.21605	0.000964086	0.97523	0.997424
ENSMUSG00000025915_Sgk3	3915.87	0.501165	0.172571	8.10286	0.00441954	0.0166492
ENSMUSG00000046101_Mcmdc2	1.91223	2.61761	1.46152	3.37534	0.066179	0.151132
ENSMUSG00000098234_Snhg6	125.822	0.339726	0.236957	2.02298	0.154935	0.289448
ENSMUSG00000093178_Snord87	2.10825	-0.471852	1.04472	0.157187	0.69176	0.81583
ENSMUSG00000099032_Tcf24	4.25429	0.087653	2.9068	4.71441185325716e-05	0.994522	1
ENSMUSG00000025917_Cops5	1491.6	0.182067	0.0612404	8.82921	0.00296447	0.0118693
ENSMUSG00000056763_Cspp1	284.411	-0.346358	0.13632	6.42578	0.0112475	0.0363396
ENSMUSG00000067851_Arfgef1	1495.54	0.0663598	0.0996665	0.439721	0.507257	0.667326
ENSMUSG00000102556_Gm37569	1.89779	-0.927648	2.93904	0.0845694	0.771198	0.872005
ENSMUSG00000048960_Prex2	2.81839	-2.12589	2.75275	0.385898	0.534464	0.69143
ENSMUSG00000057715_A830018L16Rik	1.45628	0.957555	3.00895	0.0230049	0.879444	NA
ENSMUSG00000103561_Gm38069	0.836961	0.870044	2.06858	0.225709	0.634724	NA
ENSMUSG00000016918_Sulf1	20.0892	4.05284	0.780999	21.7487	3.1080616274106e-06	2.96238856105169e-05
ENSMUSG00000025938_Slco5a1	261.335	0.00157603	0.283971	2.64740162378985e-05	0.995895	1
ENSMUSG00000005886_Ncoa2	1000.64	-0.403106	0.124734	10.3046	0.00132701	0.00602964
ENSMUSG00000103506_Gm38376	1.59669	0.00763818	1.96782	0.000278457	0.986686	NA
ENSMUSG00000103085_Gm38120	3.69861	-2.01809	1.16722	1.80933	0.178588	0.321843
ENSMUSG00000102664_Gm38380	7.03567	-1.01041	0.601805	2.59383	0.107281	0.217995
ENSMUSG00000025935_Tram1	5834	-0.121705	0.057873	4.41895	0.0355419	0.0926555
ENSMUSG00000025937_Lactb2	372.102	-0.114599	0.10925	1.09559	0.295236	0.459265
ENSMUSG00000102982_Gm38319	2.57018	0.512398	1.44892	0.0800357	0.777249	0.875828
ENSMUSG00000097711_Gm5523	1.92838	1.57629	1.14551	1.68775	0.193897	0.341209
ENSMUSG00000025932_Eya1	129.895	-1.54187	0.310835	23.1623	1.48885695301197e-06	1.55047394591637e-05
ENSMUSG00000025930_Msc	9.14657	0.0281281	0.878459	0.000561159	0.981101	1
ENSMUSG00000082193_Rpl5-ps1	27.3615	0.0854088	0.349154	0.0587113	0.808544	0.896751
ENSMUSG00000025925_Terf1	305.335	-0.0471082	0.0969285	0.235986	0.62712	0.767067
ENSMUSG00000104379_Gm37509	0.659083	-0.516737	3.02939	0.0428508	0.836006	NA
ENSMUSG00000032719_Sbspon	1.37055	-0.402021	2.34275	0.0283671	0.866249	NA
ENSMUSG00000043716_Rpl7	6967.45	0.277528	0.132076	4.39115	0.0361259	0.0939411
ENSMUSG00000025921_Rdh10	137.131	-0.785701	0.184346	17.7213	2.55748403513083e-05	0.000195751
ENSMUSG00000025920_Stau2	84.6761	-0.138381	0.23728	0.327683	0.567026	0.718945
ENSMUSG00000025939_Ube2w	1272.55	0.320556	0.0965326	10.9361	0.000943089	0.00450883
ENSMUSG00000102457_Gm38342	6.28971	-0.739093	0.596861	1.41452	0.234307	0.390379
ENSMUSG00000079658_Eloc	2460.51	0.120046	0.0533068	5.06963	0.0243486	0.0683305
ENSMUSG00000025940_Tmem70	887.2	-0.0119368	0.0594062	0.0403706	0.840758	0.916125
ENSMUSG00000025779_Ly96	291.215	0.536365	0.201759	6.96286	0.00832188	0.0283066
ENSMUSG00000042686_Jph1	1.95446	3.45415	2.20694	0.829539	0.362406	0.529258
ENSMUSG00000101589_Rbm6-ps1	1.59224	0.556057	0.82387	0.449799	0.502431	NA
ENSMUSG00000067780_Pi15	1.08062	0.151448	2.05409	0.0136785	0.906896	NA
ENSMUSG00000025776_Crispld1	0.833664	-1.28137	2.34099	-0.188044	1	NA
ENSMUSG00000025929_Il17a	110.65	-2.48684	0.682079	12.3505	0.000440864	0.00233337
ENSMUSG00000041872_Il17f	375.682	-2.81991	0.340332	63.8446	1.34632734123365e-15	6.98541345279016e-14
ENSMUSG00000041859_Mcm3	2655	-0.304472	0.156441	3.75806	0.0525535	0.126347
ENSMUSG00000025931_Paqr8	331.856	0.873962	0.214007	15.7375	7.27682996889336e-05	0.000487589
ENSMUSG00000041809_Efhc1	3.99642	1.77247	1.45934	0.385911	0.534456	0.69143
ENSMUSG00000041779_Tram2	151.725	0.28889	0.178403	2.60253	0.106693	0.217202
ENSMUSG00000025933_Tmem14a	41.4764	0.984304	0.371739	6.28421	0.0121818	0.0387882
ENSMUSG00000025934_Gsta3	2.4501	-1.78523	1.40202	1.97781	0.159621	0.295736
ENSMUSG00000099343_Gm28836	5.00341	-2.15165	0.900884	6.14659	0.0131666	0.0413401
ENSMUSG00000025936_Gm4956	104.254	-0.879691	0.28028	9.61697	0.00192787	0.00826252
ENSMUSG00000093963_Gm21909	1.82255	-1.49461	1.37562	0.440471	0.506895	NA
ENSMUSG00000067750_Khdc1a	7.09741	1.41948	0.815126	2.70037	0.100325	0.207505
ENSMUSG00000085079_Khdc1b	9.94207	0.432046	0.702598	0.420205	0.516835	0.675932
ENSMUSG00000085679_Gm16328	2.03256	-0.469056	1.08393	0.219626	0.639325	0.776945
ENSMUSG00000028033_Kcnq5	25.7839	-0.437075	0.585267	0.511606	0.474444	0.638339
ENSMUSG00000082935_Gm7658	3.86671	0.346545	0.550788	0.392992	0.530731	0.688322
ENSMUSG00000026158_Ogfrl1	2657.92	0.524433	0.0908933	32.9626	9.39465076086219e-09	1.62161444781948e-07
ENSMUSG00000097920_Gm7784	0.97214	-0.0684139	1.28473	-0.00255963	1	NA
ENSMUSG00000026156_B3gat2	2.98713	-2.68576	1.59536	0.741117	0.389303	0.556071
ENSMUSG00000026155_Smap1	777.518	0.135906	0.0751772	3.26217	0.0708953	0.15944
ENSMUSG00000026154_Sdhaf4	366.319	0.116209	0.0728576	2.54433	0.110691	0.223376
ENSMUSG00000026153_Fam135a	99.8922	-1.15529	0.297735	14.3652	0.000150559	0.000908701
ENSMUSG00000101939_Gm28438	21.026	0.111522	0.373533	0.0890231	0.765423	0.868694
ENSMUSG00000101111_Gm28437	3.9291	0.366453	0.753851	0.219761	0.639222	0.776945
ENSMUSG00000100862_Gm10925	1.48569	-0.444701	0.934108	0.222029	0.637498	NA
ENSMUSG00000102070_Gm28661	1.45993	-0.475456	0.986936	0.228402	0.632712	NA
ENSMUSG00000101249_Gm29216	3.93239	-0.0733057	0.53964	0.0179971	0.893281	0.949533
ENSMUSG00000073725_Lmbrd1	2725.51	-0.381182	0.117599	10.3375	0.00130353	0.00594755
ENSMUSG00000086240_Gm7846	24.3364	0.356244	0.226327	2.48203	0.115153	0.230661
ENSMUSG00000048874_Phf3	991.365	-0.276587	0.0923549	8.89594	0.00285805	0.0115088
ENSMUSG00000103783_Gm37522	1.29872	2.7444	3.01337	0.967902	0.325204	NA
ENSMUSG00000104315_Gm37906	5.23009	0.749652	1.01907	0.26602	0.606014	0.750797
ENSMUSG00000117310_	16.1832	-0.678851	0.330501	4.20728	0.0402509	0.102249
ENSMUSG00000026064_Ptp4a1	39.704	-0.428818	0.312389	1.76142	0.184447	0.329465
ENSMUSG00000070960_Gm19680	1.43335	1.18682	1.12606	0.977211	0.322888	NA
ENSMUSG00000026134_Prim2	320.227	-0.208668	0.0899055	5.37917	0.0203786	0.0592559
ENSMUSG00000103746_1700001G17Rik	1.77175	-0.455694	2.22937	0.0981902	0.754012	NA
ENSMUSG00000004768_Rab23	50.1713	-0.402758	0.200598	3.9863	0.0458718	0.113384
ENSMUSG00000042215_Bag2	101.508	-0.976082	0.123352	62.8984	2.17647198215664e-15	1.10322667706493e-13
ENSMUSG00000042197_Zfp451	930.343	-0.0507826	0.167329	0.0900022	0.764174	0.867781
ENSMUSG00000081402_Gm15455	1.3943	-0.154375	1.0087	0.0224034	0.881019	NA
ENSMUSG00000042182_Bend6	26.1337	-1.35508	0.635088	3.61009	0.0574301	0.134991
ENSMUSG00000026131_Dst	145.708	-0.293799	0.222286	1.70339	0.191845	0.338826
ENSMUSG00000103364_Gm38157	1.54714	-0.431099	0.987527	0.178173	0.672948	NA
ENSMUSG00000101462_Gm3052	1.3594	-0.0885328	1.9202	0.00638248	0.936324	NA
ENSMUSG00000102336_Gm37233	6.94744	3.96144	0.928601	15.759	7.19436844502671e-05	0.000483722
ENSMUSG00000042111_Ccdc115	1065.81	0.103227	0.106814	0.923754	0.336491	0.503192
ENSMUSG00000101711_Gm28306	0.677501	-1.21678	3.00747	-0.433684	1	NA
ENSMUSG00000026127_Imp4	1597.6	-0.197442	0.0735877	7.18211	0.0073634	0.0255954
ENSMUSG00000026126_Ptpn18	1183.22	0.295605	0.162553	3.2423	0.07176	0.16087
ENSMUSG00000100280_Gm28417	16.133	0.630666	0.352254	3.11676	0.0774906	0.1708
ENSMUSG00000101223_4930568A12Rik	20.5878	-0.0451816	0.297046	0.0228249	0.879913	0.941525
ENSMUSG00000037509_Arhgef4	57.1454	-0.439319	0.209415	4.34051	0.0372158	0.0962488
ENSMUSG00000104002_Gm38336	3.62456	1.1563	1.13487	1.09624	0.295092	0.459163
ENSMUSG00000037503_Fam168b	3153.93	-0.147783	0.0547902	7.26447	0.0070332	0.0246281
ENSMUSG00000104358_Gm37127	4.78734	-0.862298	1.19052	0.299511	0.584189	0.733269
ENSMUSG00000026123_Plekhb2	4776.21	-0.0551344	0.0933657	0.347427	0.555573	0.709022
ENSMUSG00000045216_Hs6st1	961.593	-0.159444	0.0991222	2.56678	0.10913	0.220862
ENSMUSG00000102202_Gm33280	2.80097	-0.664811	1.4928	0.0303786	0.861634	0.929715
ENSMUSG00000037470_Uggt1	3263.46	-0.0505722	0.0704785	0.512822	0.47392	0.637828
ENSMUSG00000047180_Neurl3	7658.91	-0.774345	0.0998631	59.0299	1.55293276697735e-14	7.09468426970511e-13
ENSMUSG00000037447_Arid5a	6105.71	-0.509891	0.121539	17.3748	3.06860678379498e-05	0.000229871
ENSMUSG00000102762_4930403P22Rik	1.96702	-0.0267057	1.11622	-0.000642973	1	1
ENSMUSG00000010453_Kansl3	1225.97	-0.247494	0.0696239	12.5836	0.000389138	0.00209249
ENSMUSG00000037432_Fer1l5	18.7954	0.0603247	0.406783	0.0212497	0.884101	0.944397
ENSMUSG00000001143_Lman2l	724.47	0.175978	0.123598	2.00283	0.157006	0.292293
ENSMUSG00000037408_Cnnm4	271.304	0.00935635	0.0990468	0.00892328	0.924741	0.96771
ENSMUSG00000104316_Gm37909	1.48731	3.97097	2.52408	2.84529	0.0916422	NA
ENSMUSG00000001138_Cnnm3	430.955	-0.414089	0.212512	3.63075	0.0567214	0.133844
ENSMUSG00000067653_Ankrd23	11.3425	-1.15389	0.634463	2.85173	0.0912759	0.19375
ENSMUSG00000079610_Ankrd39	209.494	-0.835035	0.308131	6.59554	0.0102234	0.0335878
ENSMUSG00000026121_Sema4c	891.269	-1.13953	0.487565	4.03186	0.0446487	0.110922
ENSMUSG00000087589_D430040D24Rik	5.40345	-3.32057	0.758137	19.993	7.77259062423803e-06	6.7312701373571e-05
ENSMUSG00000046337_Fam178b	6.21651	0.523484	0.590027	0.722495	0.395327	0.562027
ENSMUSG00000089906_Gm6428	0.697611	-1.12906	3.02802	0.140982	0.707307	NA
ENSMUSG00000061518_Cox5b	2553.18	0.354166	0.075936	21.6351	3.29760879028958e-06	3.13014792295755e-05
ENSMUSG00000037351_Actr1b	1954.1	-0.302479	0.0866695	12.1021	0.000503654	0.00261784
ENSMUSG00000102416_4933424G06Rik	1.76213	-0.505891	1.70794	0.0805346	0.776574	NA
ENSMUSG00000026117_Zap70	1322.96	-1.72404	0.232424	50.4571	1.21800528323073e-12	4.28469898534907e-11
ENSMUSG00000026116_Tmem131	2988.86	0.355141	0.136372	6.64713	0.00993159	0.0327865
ENSMUSG00000103016_Gm37506	0.849901	1.01992	2.63534	0.188862	0.663866	NA
ENSMUSG00000102930_Gm38115	32.4057	-0.968773	0.486374	3.81344	0.0508431	0.122959
ENSMUSG00000103159_F830112A20Rik	0.879449	-0.417541	2.30949	0.0864563	0.768732	NA
ENSMUSG00000080054_Rpl12-ps1	3.14984	-1.4377	0.86959	2.97599	0.0845083	0.182786
ENSMUSG00000050122_Vwa3b	11.0463	0.615634	0.875309	0.478459	0.489121	0.651557
ENSMUSG00000026114_Cnga3	5.46195	0.802126	1.2624	0.38955	0.532536	0.689869
ENSMUSG00000026113_Inpp4a	212.016	-0.10062	0.192435	0.269607	0.603595	0.748999
ENSMUSG00000086064_4930439A04Rik	1.72143	0.541637	1.83447	0.122647	0.726181	NA
ENSMUSG00000026112_Coa5	3135.97	0.394296	0.0730099	29.0059	7.2156653979209e-08	1.02517236416826e-06
ENSMUSG00000026111_Unc50	1327.58	0.122002	0.0681978	3.1956	0.0738366	0.164228
ENSMUSG00000026110_Mgat4a	1009.62	-0.654655	0.105095	38.2117	6.3472305417178e-10	1.40429481758836e-08
ENSMUSG00000103948_4930594C11Rik	2.32208	1.02734	1.2933	0.300516	0.583559	0.732953
ENSMUSG00000087233_Gm43213	1.18407	2.13676	1.35028	2.24494	0.134052	NA
ENSMUSG00000026090_2010300C02Rik	32.5576	-0.881748	0.732898	1.08127	0.298414	0.46253
ENSMUSG00000060771_Tsga10	242.366	-0.299375	0.26291	1.19033	0.275264	0.437047
ENSMUSG00000037216_Lipt1	17.6197	-0.372208	0.391818	0.850354	0.356452	0.523037
ENSMUSG00000026088_Mitd1	337.251	0.320645	0.14662	4.7139	0.0299196	0.0804428
ENSMUSG00000026087_Mrpl30	963.871	0.536963	0.139136	14.6603	0.000128731	0.000795588
ENSMUSG00000058407_Txndc9	1748.1	0.0785864	0.0358417	4.80636	0.0283548	0.0771554
ENSMUSG00000026083_Eif5b	1852.22	0.143426	0.0815042	3.07996	0.0792624	0.17392
ENSMUSG00000026082_Rev1	225.552	0.187003	0.117483	2.52906	0.111767	0.225031
ENSMUSG00000037138_Aff3	205.367	-1.30857	0.189479	46.3174	1.00568512629532e-11	3.11975232564521e-10
ENSMUSG00000085391_Gm16150	1.71297	-1.33352	2.36698	0.309473	0.578004	NA
ENSMUSG00000085280_Gm16151	0.716293	-2.31683	2.7121	1.04105	0.307576	NA
ENSMUSG00000087131_Gm16152	0.938526	-1.03913	2.6179	0.0681696	0.794021	NA
ENSMUSG00000026080_Chst10	179.454	-0.692118	0.176563	14.8991	0.000113414	0.000714706
ENSMUSG00000026078_Pdcl3	1451.38	0.172449	0.10831	2.51769	0.112575	0.226347
ENSMUSG00000103046_Gm37309	6.94878	0.105348	1.02756	0.00809208	0.928322	0.970015
ENSMUSG00000026077_Npas2	61.9829	-1.9598	0.560076	10.5673	0.00115108	0.00534488
ENSMUSG00000073702_Rpl31	1941.02	0.152501	0.164028	0.854724	0.355219	0.521793
ENSMUSG00000003134_Tbc1d8	7526.78	0.162251	0.139056	1.35433	0.244523	0.402463
ENSMUSG00000003135_Cnot11	754.59	-0.0337764	0.0867722	0.151222	0.69737	0.819703
ENSMUSG00000085894_Gm15832	54.897	0.0615101	0.378722	0.0240868	0.876664	0.939249
ENSMUSG00000077704_Snord89	1.13359	0.433366	1.49239	0.0502182	0.822684	NA
ENSMUSG00000048234_Rnf149	4031.97	0.75197	0.153673	23.0556	1.57387234563497e-06	1.6293608409284e-05
ENSMUSG00000064936_Gm23722	6.8501	1.03924	0.518626	3.9027	0.0482086	0.117933
ENSMUSG00000050967_Creg2	24.8548	3.57911	0.812279	16.8341	4.07946649501992e-05	0.000294193
ENSMUSG00000097083_D930019O06Rik	1.18686	2.56807	3.02093	0.732678	0.392017	NA
ENSMUSG00000057173_Rfx8	1.61353	-3.99858	2.4438	2.99336	0.0836065	NA
ENSMUSG00000101634_1700066B17Rik	1.65084	0.496225	1.4901	-0.981647	1	NA
ENSMUSG00000026074_Map4k4	1632.42	0.181527	0.0764321	5.6282	0.0176738	0.0528871
ENSMUSG00000102985_4930456G14Rik	1.44525	3.13703	2.25727	2.01691	0.155556	NA
ENSMUSG00000026073_Il1r2	9160	0.372234	0.464942	0.501765	0.478726	0.642379
ENSMUSG00000097899_Gm16894	27.5909	0.948239	0.470896	3.39872	0.0652469	0.149665
ENSMUSG00000102975_Gm37347	6.99655	0.217608	0.523263	0.170747	0.679449	0.807488
ENSMUSG00000026072_Il1r1	951.149	-1.90029	0.470268	14.5522	0.00013633	0.000835219
ENSMUSG00000103560_Gm38070	1.5316	-3.45378	2.45809	2.29141	0.130092	NA
ENSMUSG00000070942_Il1rl2	206.495	-4.88541	0.731522	28.3174	1.02966443212719e-07	1.41600998410361e-06
ENSMUSG00000026069_Il1rl1	391.249	-1.73503	0.711246	5.19475	0.0226552	0.0644168
ENSMUSG00000026070_Il18r1	910.585	-1.56991	0.179962	74.6135	5.72512231579473e-18	4.04414363102464e-16
ENSMUSG00000026068_Il18rap	1608.57	-0.227183	0.183588	1.49686	0.221156	0.374425
ENSMUSG00000026065_Slc9a4	38.4644	1.16391	0.26446	19.0096	1.30064571689451e-05	0.000106554
ENSMUSG00000026062_Slc9a2	43.2855	-1.39593	0.786164	2.69917	0.100401	0.207637
ENSMUSG00000041945_Mfsd9	3.82979	2.41586	0.778309	9.11385	0.00253682	0.0104131
ENSMUSG00000060679_Mrps9	562.065	0.216924	0.129267	2.79427	0.0946017	0.198633
ENSMUSG00000041907_Gpr45	9.32894	-0.863528	0.644451	1.59964	0.205954	0.356688
ENSMUSG00000070939_Tgfbrap1	412.769	-0.0801522	0.201322	0.153421	0.695287	0.818234
ENSMUSG00000041878_8430432A02Rik	6.24519	0.15397	1.00486	0.0142951	0.90483	0.956491
ENSMUSG00000010290_AI597479	375.302	0.066873	0.160626	0.169924	0.680179	0.808083
ENSMUSG00000008136_Fhl2	243.101	-0.14125	0.668647	0.0361833	0.849138	0.922057
ENSMUSG00000066877_Nck2	1132.15	-0.337992	0.168154	3.92102	0.0476861	0.11698
ENSMUSG00000103945_Gm38228	9.05118	-2.62244	1.04831	4.33428	0.0373522	0.0965449
ENSMUSG00000026051_1500015O10Rik	0.664893	2.17381	3.02975	0.735624	0.391066	NA
ENSMUSG00000057363_Uxs1	468.537	0.289376	0.129297	4.97426	0.0257272	0.0713074
ENSMUSG00000090243_Gm16103	0.981564	1.14776	2.2946	-0.0760961	1	NA
ENSMUSG00000100701_Gm19587	2.14849	0.968835	0.77768	1.53562	0.21527	0.367575
ENSMUSG00000041763_Tpp2	2285.48	-0.280068	0.0805532	12.0252	0.000524866	0.00271286
ENSMUSG00000047343_Mettl21c	1.48735	-0.292078	2.61471	0.0415452	0.838489	NA
ENSMUSG00000091844_Gm8251	1.67538	0.9036	1.61155	-0.652933	1	NA
ENSMUSG00000026049_Tex30	463.425	-0.402212	0.102329	15.3905	8.74270304368337e-05	0.000568486
ENSMUSG00000026047_Kdelc1	222.825	-0.277825	0.223395	1.47588	0.22442	0.378224
ENSMUSG00000041684_Bivm	97.998	0.525179	0.376988	1.74915	0.185984	0.331268
ENSMUSG00000026048_Ercc5	394.172	-0.171955	0.161592	1.10349	0.293501	0.457261
ENSMUSG00000101567_Txn-ps1	1.18774	1.24136	1.3787	0.644227	0.422184	NA
ENSMUSG00000056870_Gulp1	6.10831	0.305888	1.75958	0.00204582	0.963923	0.990388
ENSMUSG00000026043_Col3a1	107.104	1.408	0.474618	6.64068	0.00996761	0.0328684
ENSMUSG00000026042_Col5a2	10.6546	3.35681	1.65348	1.54538	0.213818	0.366127
ENSMUSG00000025995_Wdr75	642.908	-0.421384	0.0738369	32.4688	1.21119121011468e-08	2.04645938469809e-07
ENSMUSG00000084817_Gm5526	5.87666	0.393704	0.504573	0.582173	0.445462	0.612555
ENSMUSG00000025993_Slc40a1	46.7857	-0.409672	0.457601	0.646791	0.421262	0.587884
ENSMUSG00000101262_Gm8326	2.3498	1.37692	0.809922	2.80241	0.0941229	0.198171
ENSMUSG00000025986_Slc39a10	397.618	0.72793	0.16558	18.7537	1.48734331478456e-05	0.000119729
ENSMUSG00000100213_Gm28151	2.47213	-1.49843	1.54282	0.611517	0.434217	0.600759
ENSMUSG00000100033_Gm8337	10.1176	0.734996	0.39883	3.37255	0.066291	0.151369
ENSMUSG00000045954_Sdpr	13.2198	-2.48304	1.07186	1.86644	0.171883	0.312901
ENSMUSG00000101702_1700072G22Rik	0.958694	-3.59019	2.73718	-1.10155	1	NA
ENSMUSG00000026107_Nabp1	13804.1	-0.770145	0.15057	25.1411	5.32850742801299e-07	6.20272118804238e-06
ENSMUSG00000099413_Gm17767	31.3029	0.275562	0.523264	0.222318	0.637279	0.775535
ENSMUSG00000103424_Gm37535	1.00255	0.885232	3.00723	0.100686	0.751009	NA
ENSMUSG00000018417_Myo1b	106.746	0.692512	0.249303	7.43985	0.00637952	0.0226735
ENSMUSG00000062939_Stat4	1457.96	-0.247654	0.251959	0.882586	0.347494	0.514009
ENSMUSG00000101628_Gm28177	2.04267	0.380735	0.966258	0.118071	0.731136	0.844293
ENSMUSG00000078291_Gm3940	3.78996	-1.10632	0.854256	1.59382	0.206781	0.357628
ENSMUSG00000109599_Gm45679	14.5726	0.00138878	0.577095	5.8079224913854e-06	0.998077	1
ENSMUSG00000026104_Stat1	2366.4	0.253333	0.108616	5.37381	0.0204412	0.0594006
ENSMUSG00000099569_Gm18301	0.939415	2.87325	2.34267	-0.718603	1	NA
ENSMUSG00000026103_Gls	3872.8	-0.366938	0.0574206	40.7007	1.77425619624315e-10	4.30446789458218e-09
ENSMUSG00000002881_Nab1	5522.54	-0.437417	0.0710504	37.6141	8.62210678624407e-10	1.86536575969553e-08
ENSMUSG00000101501_Rps27a-ps1	0.7898	-0.111294	3.02765	0.00229362	0.961803	NA
ENSMUSG00000100120_Gm553	0.753857	-0.53118	2.11626	0.0842598	0.771606	NA
ENSMUSG00000043015_Nemp2	483.853	-0.80389	0.190532	17.0936	3.55827314046449e-05	0.000260886
ENSMUSG00000103630_Gm37242	1.55676	-1.88116	1.45875	1.69274	0.19324	NA
ENSMUSG00000041439_Mfsd6	2861.54	-0.918959	0.140543	41.5434	1.15281655317732e-10	2.86801843760056e-09
ENSMUSG00000026102_Inpp1	796.078	-0.991341	0.12877	57.5968	3.21754686021988e-14	1.39736868455327e-12
ENSMUSG00000041426_Hibch	193.404	-0.23926	0.132123	3.25952	0.0710099	0.159595
ENSMUSG00000043629_1700019D03Rik	3.34458	-0.643507	0.922218	0.39185	0.531329	0.688844
ENSMUSG00000026098_Pms1	168.763	-0.241376	0.0973196	6.13562	0.0132485	0.0415601
ENSMUSG00000026097_Ormdl1	443.108	0.00475321	0.124048	0.00145353	0.969588	0.994117
ENSMUSG00000026096_Osgepl1	80.2775	-0.00938109	0.268192	0.00116226	0.972804	0.995927
ENSMUSG00000026095_Asnsd1	130.635	0.304381	0.158492	3.66125	0.0556919	0.131946
ENSMUSG00000096141_Dnah7a	0.638817	-1.71216	3.02885	0.35432	0.551678	NA
ENSMUSG00000026094_Stk17b	14872.6	-0.315531	0.099198	10.0394	0.00153224	0.00682465
ENSMUSG00000042807_Hecw2	28.1041	0.379932	0.475207	0.514535	0.473182	0.637226
ENSMUSG00000025983_Ccdc150	2.32877	0.909497	1.7133	0.259638	0.610369	0.754456
ENSMUSG00000041303_Gtf3c3	312.126	0.294424	0.207722	1.95096	0.162484	0.299843
ENSMUSG00000073678_Pgap1	82.3216	-0.78127	0.270076	7.83489	0.00512474	0.0188773
ENSMUSG00000104136_Gm36955	1.24964	1.43713	2.87888	-0.194979	1	NA
ENSMUSG00000052331_Ankrd44	2264.24	-0.157308	0.0982505	2.5375	0.11117	0.224061
ENSMUSG00000101674_4930444A19Rik	4.23292	0.427295	0.661844	0.386149	0.53433	0.69143
ENSMUSG00000102503_Gm37370	17.4441	-0.69101	0.33617	4.2006	0.0404096	0.102593
ENSMUSG00000102642_A130048G24Rik	6.61496	-1.61162	0.912701	2.82871	0.0925924	0.195864
ENSMUSG00000025982_Sf3b1	14075.5	-0.242046	0.0421562	32.8901	9.75209609783859e-09	1.6734596903891e-07
ENSMUSG00000103030_E330011M16Rik	11.7018	1.03785	0.700624	2.13062	0.144382	0.274455
ENSMUSG00000025981_Coq10b	5175.19	-0.11692	0.0541148	4.65686	0.0309298	0.0825655
ENSMUSG00000101122_Gm17971	54.1663	0.067899	0.286365	0.0536904	0.816762	0.900676
ENSMUSG00000025980_Hspd1	5189.23	0.194553	0.0916534	4.46948	0.0345055	0.0904951
ENSMUSG00000073676_Hspe1	2238.99	0.801362	0.112477	49.6305	1.85605087432506e-12	6.30517370915719e-11
ENSMUSG00000025979_Mob4	1701.69	0.0210865	0.0805327	0.0682976	0.793832	0.887092
ENSMUSG00000025978_Rftn2	16.8825	-0.758324	0.396553	3.5254	0.0604352	0.140614
ENSMUSG00000046994_Mars2	157.111	-0.30212	0.162611	3.39662	0.0653303	0.149797
ENSMUSG00000025977_Boll	18.4422	0.0695956	0.679223	0.00691152	0.933744	0.973079
ENSMUSG00000100215_Gm8292	1.3196	-1.26	1.09911	1.26342	0.261005	NA
ENSMUSG00000038349_Plcl1	254.398	1.39437	0.231641	33.3271	7.78879688535046e-09	1.37271691800029e-07
ENSMUSG00000102145_Gm38056	11.3546	0.0100528	0.365055	0.000751714	0.978127	0.999059
ENSMUSG00000038331_Satb2	4.79187	-3.22426	1.28807	4.67889	0.0305355	0.0817115
ENSMUSG00000087022_9130024F11Rik	0.717486	-0.0117725	2.19472	0.000334149	0.985416	NA
ENSMUSG00000097519_4930558J18Rik	5.71617	0.413609	1.46992	-0.535385	1	1
ENSMUSG00000038323_1700066M21Rik	71.1894	0.588264	0.330895	2.91498	0.0877603	0.188177
ENSMUSG00000048495_Tyw5	207.526	-0.0870389	0.0877321	0.983898	0.321238	0.486844
ENSMUSG00000025971_Maip1	332.349	0.099658	0.0794655	1.57152	0.209987	0.361181
ENSMUSG00000038305_Spats2l	5.71779	-1.48634	1.31233	1.20056	0.273209	0.43461
ENSMUSG00000054770_Kctd18	273.83	-0.244782	0.118272	4.27904	0.0385851	0.0991053
ENSMUSG00000026039_Sgol2a	22.0405	0.603377	0.302639	3.84127	0.0500055	0.121384
ENSMUSG00000063558_Aox1	1.76092	1.95505	2.97691	0.33561	0.562374	NA
ENSMUSG00000064294_Aox3	5.32355	-0.170147	1.13622	0.010677	0.917702	0.963924
ENSMUSG00000079554_Aox2	3.50196	-2.49601	0.815132	9.43397	0.00213003	0.00897154
ENSMUSG00000103839_Gm37607	1.50931	-2.16628	1.3151	3.18232	0.0744389	NA
ENSMUSG00000051223_Bzw1	10924.4	-0.231935	0.0875956	6.97432	0.00826875	0.0281761
ENSMUSG00000026034_Clk1	5270.1	-0.304453	0.0497777	37.3157	1.00474794515043e-09	2.13952925027251e-08
ENSMUSG00000026035_Ppil3	222.422	0.228685	0.119836	3.62114	0.0570499	0.134349
ENSMUSG00000026036_Nif3l1	330.558	0.180911	0.171678	1.07927	0.298862	0.463045
ENSMUSG00000026037_Orc2	394.608	0.0253201	0.0798194	0.100498	0.751233	0.858439
ENSMUSG00000085054_Gm15834	1.05686	-1.45563	3.01486	0.162341	0.68701	NA
ENSMUSG00000038174_Fam126b	175.956	0.520978	0.238461	4.73692	0.0295219	0.0796168
ENSMUSG00000026032_Ndufb3	1331.65	0.543293	0.125523	18.516	1.68482610376459e-05	0.000133971
ENSMUSG00000047528_Als2cr12	10.3168	1.31963	0.897582	1.81362	0.178075	0.321115
ENSMUSG00000102059_Gm20257	55.4014	1.10437	0.241976	20.1434	7.18493439191202e-06	6.26553351608035e-05
ENSMUSG00000026031_Cflar	1425.61	0.428436	0.0559854	58.367	2.17504248673863e-14	9.7098533754431e-13
ENSMUSG00000026029_Casp8	2496.2	0.597166	0.0665316	79.9407	3.8582193098727e-19	3.2626067039111e-17
ENSMUSG00000102719_Gm37760	12.7377	-0.637454	0.503522	1.4214	0.233174	0.38904
ENSMUSG00000099719_Gm28802	5.3124	1.33935	0.569919	5.50772	0.0189327	0.0557802
ENSMUSG00000026028_Trak2	746.551	-0.272801	0.124024	4.80587	0.028363	0.0771658
ENSMUSG00000026027_Stradb	388.032	-0.0683807	0.0858612	0.632788	0.426335	0.592978
ENSMUSG00000038079_Tmem237	120.561	-0.252731	0.155839	2.59661	0.107093	0.217743
ENSMUSG00000097573_G730003C15Rik	3.06676	-0.450509	0.851954	0.249419	0.617484	0.759931
ENSMUSG00000101586_Gm29017	1.55097	-0.524212	1.43605	0.102263	0.74913	NA
ENSMUSG00000026024_Als2	544.909	0.155072	0.113868	1.84796	0.174021	0.315552
ENSMUSG00000026023_Cdk15	2.4165	3.49756	1.3077	5.32118	0.0210678	0.0607671
ENSMUSG00000041075_Fzd7	186.941	0.879809	0.204915	17.9086	2.31775603139367e-05	0.000179749
ENSMUSG00000097819_Gm26813	2.65691	1.50978	1.06754	1.69476	0.192975	0.339868
ENSMUSG00000047361_Gm973	16.2504	-0.0904723	0.918325	0.00408162	0.94906	0.981365
ENSMUSG00000099811_Gm28411	1.87235	-0.0965606	1.7624	-0.00236412	1	1
ENSMUSG00000026021_Sumo1	3458.37	-0.22495	0.0471192	22.7462	1.84871969633012e-06	1.89053085690409e-05
ENSMUSG00000103821_D430013B06Rik	6.48194	0.119961	0.729631	0.0248182	0.874821	0.938188
ENSMUSG00000026020_Nop58	2330.99	-0.491114	0.121039	16.2517	5.54586366940425e-05	0.000386167
ENSMUSG00000077345_Snord70	0.773306	-2.5462	2.26044	1.64493	0.19965	NA
ENSMUSG00000089512_Gm26287	1.35428	-0.318313	1.39144	0.0415739	0.838434	NA
ENSMUSG00000067336_Bmpr2	142.629	0.260712	0.270883	0.913605	0.33916	0.505509
ENSMUSG00000041040_Fam117b	2432.44	-0.0636697	0.0709151	0.803477	0.370056	0.537128
ENSMUSG00000103696_Gm37531	31.0908	0.0553115	0.389019	0.0192436	0.88967	0.947656
ENSMUSG00000100901_Gm18829	1.41687	1.00233	2.98475	0.122385	0.726462	NA
ENSMUSG00000026018_Ica1l	9.46085	0.0144689	0.741547	0.000328248	0.985545	1
ENSMUSG00000026019_Wdr12	506.365	0.0233471	0.0988447	0.0555195	0.813723	0.899281
ENSMUSG00000026017_Carf	43.7005	0.323827	0.170927	3.58456	0.0583188	0.136533
ENSMUSG00000082609_Gm15464	1.32956	0.578507	1.13101	0.237232	0.626212	NA
ENSMUSG00000073664_Nbeal1	194.382	-0.209312	0.120974	2.9926	0.0836458	0.181411
ENSMUSG00000049439_Cyp20a1	559.147	0.0349283	0.0927604	0.141372	0.706921	0.827005
ENSMUSG00000103822_6030460B20Rik	0.73713	-0.0979482	3.00275	0.000141604	0.990506	NA
ENSMUSG00000026782_Abi2	556.57	-0.266979	0.183346	2.11306	0.146047	0.277051
ENSMUSG00000026014_Raph1	106.65	0.83593	0.22878	12.7682	0.00035257	0.00191694
ENSMUSG00000081562_Gm11575	0.977649	-0.601104	1.67737	0.14817	0.70029	NA
ENSMUSG00000101188_Eif4a-ps4	56.9106	0.0615805	0.171799	0.128296	0.720206	0.836372
ENSMUSG00000026012_Cd28	978.056	-1.72407	0.252213	41.8985	9.61366183939638e-11	2.41909439332107e-09
ENSMUSG00000086795_Gm11579	0.692255	-0.601765	2.76587	0.0557821	0.813291	NA
ENSMUSG00000104069_Gm37198	1.37828	-0.584845	1.84162	0.153289	0.695412	NA
ENSMUSG00000026011_Ctla4	595.042	-0.329341	0.2126	2.28836	0.130348	0.25406
ENSMUSG00000081382_Rpl18-ps1	38.514	0.432724	0.278569	2.39393	0.121807	0.241151
ENSMUSG00000026009_Icos	8659.8	-1.22497	0.104549	133.27	7.89318200796608e-31	1.57959308675012e-28
ENSMUSG00000102561_Gm37039	22.7224	-2.27318	0.464921	22.0636	2.63768236284925e-06	2.57031551690612e-05
ENSMUSG00000052062_Pard3b	29.3007	-1.05647	0.557332	2.92826	0.087041	0.18684
ENSMUSG00000025969_Nrp2	1150.22	1.05222	0.183103	31.1886	2.34137991880805e-08	3.71348344381557e-07
ENSMUSG00000100811_Gm29083	1.00063	1.99422	1.94136	1.30926	0.25253	NA
ENSMUSG00000103032_Gm37121	4.37306	-3.13792	1.02186	8.96808	0.00274738	0.0111447
ENSMUSG00000040865_Ino80d	215.552	0.0722048	0.171911	0.173082	0.677387	0.80583
ENSMUSG00000084799_Ino80dos	19.3818	-0.240083	0.642559	0.0990774	0.75294	0.859212
ENSMUSG00000101599_Gm20342	23.5019	-0.316174	0.488394	0.359661	0.548695	0.703733
ENSMUSG00000025968_Ndufs1	1678.9	-0.0584323	0.0563545	1.07314	0.300237	0.464619
ENSMUSG00000025967_Eef1b2	3551.33	0.0364304	0.121509	0.088701	0.765835	0.86905
ENSMUSG00000064602_Snora41	9.67484	0.0520771	0.39954	0.0168404	0.896748	0.952005
ENSMUSG00000027520_Zdbf2	35.3069	-2.8647	0.471414	31.9851	1.55359950223131e-08	2.55624524272652e-07
ENSMUSG00000081643_Gm11605	1.03044	1.07722	1.035	1.06377	0.302358	NA
ENSMUSG00000025964_Adam23	2911.55	-0.276054	0.214041	1.63963	0.200376	0.349776
ENSMUSG00000025962_Fastkd2	405.695	-0.0147063	0.204529	0.00516344	0.942716	0.977731
ENSMUSG00000025959_Klf7	587.604	-0.346051	0.106939	10.3992	0.00126072	0.0057732
ENSMUSG00000086836_Gm13748	1.93959	-1.12355	1.08267	1.04426	0.306833	0.471674
ENSMUSG00000025958_Creb1	1322.05	0.176578	0.147795	1.40653	0.235633	0.391748
ENSMUSG00000025956_Mettl21a	220.01	0.612985	0.137931	19.4791	1.0170870370824e-05	8.56778922185938e-05
ENSMUSG00000087213_2810408I11Rik	45.5479	1.10963	0.349859	9.3726	0.00220253	0.00922167
ENSMUSG00000070871_Ccnyl1	307.658	-0.258607	0.0930509	7.72483	0.00544664	0.019851
ENSMUSG00000045005_Fzd5	109.933	-0.392321	0.210797	3.39541	0.0653783	0.149868
ENSMUSG00000051344_Plekhm3	1029.06	0.237499	0.128429	3.38787	0.0656779	0.15032
ENSMUSG00000084416_Rpl10a-ps1	82.0689	0.311926	0.191461	2.6301	0.104855	0.214353
ENSMUSG00000025955_Akr1cl	5.36109	-2.34995	0.814909	7.94457	0.00482319	0.0179242
ENSMUSG00000044816_D630023F18Rik	3.19024	1.75074	1.19899	1.99783	0.157524	0.29304
ENSMUSG00000025950_Idh1	1742.49	0.596832	0.116347	26.1041	3.23496337744916e-07	3.94042734390259e-06
ENSMUSG00000025949_Pikfyve	310.744	0.368568	0.130407	7.91503	0.00490257	0.0181616
ENSMUSG00000015222_Map2	9.53366	-1.63502	1.06783	2.04993	0.152214	0.285595
ENSMUSG00000055567_Unc80	1.57707	1.57162	2.31773	0.465096	0.495252	NA
ENSMUSG00000026005_Rpe	1379.27	0.173326	0.0988724	3.04833	0.08082	0.176567
ENSMUSG00000026004_Kansl1l	224.928	-0.130305	0.145866	0.797555	0.371825	0.538687
ENSMUSG00000102559_Gm37570	1.51173	0.0319347	1.32482	0.000544714	0.98138	NA
ENSMUSG00000102374_Gm38387	4.74779	0.0590222	1.01744	0.00292399	0.956876	0.986374
ENSMUSG00000102776_Gm38162	1.80847	2.51281	1.35226	2.12483	0.144929	NA
ENSMUSG00000103706_6820402A03Rik	9.68683	0.235935	0.771414	0.0733365	0.786539	0.882566
ENSMUSG00000103756_Gm37285	3.49027	0.263199	1.7602	-0.0428696	1	1
ENSMUSG00000103553_Gm38218	2.18717	-0.0889504	1.45529	-0.00800923	1	1
ENSMUSG00000026003_Acadl	3974.92	0.0776069	0.085632	0.816535	0.366195	0.533105
ENSMUSG00000026000_Lancl1	709.759	-0.533849	0.101013	27.6206	1.47599372205303e-07	1.96378620099779e-06
ENSMUSG00000025997_Ikzf2	144.441	-0.935788	0.30161	9.07152	0.00259621	0.0106172
ENSMUSG00000099954_Gm28112	0.688059	2.25258	3.02686	0.668084	0.41372	NA
ENSMUSG00000045648_Vwc2l	1.16709	-1.51598	3.01605	0.20339	0.651998	NA
ENSMUSG00000026196_Bard1	25.4874	-0.284732	0.369834	0.546201	0.459874	0.624853
ENSMUSG00000026192_Atic	205.435	0.0259904	0.198859	0.0165156	0.897743	0.952262
ENSMUSG00000026193_Fn1	938.575	0.30386	0.267408	1.23012	0.267385	0.427976
ENSMUSG00000100319_Gm5256	0.907001	0.0690361	1.25124	0.00874392	0.925499	NA
ENSMUSG00000101496_Gm8885	0.813349	0.424649	1.52182	0.0677484	0.794644	NA
ENSMUSG00000102123_Gm4319	1.52124	3.41964	2.46421	2.19104	0.138815	NA
ENSMUSG00000039395_Mreg	2960.56	0.499033	0.237286	4.2314	0.0396827	0.101245
ENSMUSG00000094655_Gm25360	1.50136	-0.232501	1.7135	-0.133408	1	NA
ENSMUSG00000026189_Pecr	68.3587	0.0160523	0.186257	0.00740596	0.93142	0.971909
ENSMUSG00000026187_Xrcc5	245.385	-0.559726	0.191323	8.43072	0.00368935	0.0142557
ENSMUSG00000039372_March4	1.42543	-2.54766	2.92209	0.770656	0.380014	NA
ENSMUSG00000039354_Smarcal1	470.725	-0.0290086	0.113787	0.0643628	0.799729	0.890788
ENSMUSG00000046330_Rpl37a	5840.91	0.0811498	0.145192	0.308911	0.578349	0.728505
ENSMUSG00000026185_Igfbp5	8.73167	-2.73949	1.36445	3.22625	0.0724665	0.16202
ENSMUSG00000055322_Tns1	227.563	-0.14191	0.208075	0.460903	0.497202	0.65927
ENSMUSG00000061815_Rufy4	11.6862	1.8786	0.796867	3.67874	0.0551104	0.130903
ENSMUSG00000026180_Cxcr2	17.6291	1.85514	0.760734	4.21163	0.0401478	0.102031
ENSMUSG00000006304_Arpc2	33056.7	0.235644	0.0972417	5.80473	0.0159831	0.0485958
ENSMUSG00000064272_Gpbar1	7.05303	-0.995267	1.05909	0.578772	0.446794	0.61367
ENSMUSG00000006299_Aamp	4252.7	-0.0726604	0.0493177	2.16989	0.140737	0.269272
ENSMUSG00000026179_Pnkd	674.272	0.585656	0.211842	7.20584	0.00726667	0.0253046
ENSMUSG00000103013_Gm37503	5.45998	-0.531414	0.552119	0.922217	0.336894	0.503511
ENSMUSG00000006301_Tmbim1	2643.78	0.0370358	0.131715	0.0774439	0.780792	0.878179
ENSMUSG00000103403_Gm37931	1.29834	-2.32008	3.00474	0.663635	0.415279	NA
ENSMUSG00000073650_Catip	37.8485	0.0995636	0.520028	0.0320081	0.85801	0.927511
ENSMUSG00000026177_Slc11a1	2395.88	0.0396521	0.289513	0.0165727	0.897567	0.95219
ENSMUSG00000026176_Ctdsp1	249.462	0.183983	0.189482	0.930494	0.334735	0.501589
ENSMUSG00000026175_Vil1	15.6293	-0.162321	0.662673	0.047476	0.827515	0.907712
ENSMUSG00000033364_Usp37	893.868	-0.560709	0.0788965	50.166	1.4127095313389e-12	4.92042533598415e-11
ENSMUSG00000103227_Gm37733	9.24983	0.0640438	0.534148	0.0129146	0.909521	0.958972
ENSMUSG00000026174_Cnot9	976.899	-0.0489217	0.08825	0.306561	0.579798	0.729528
ENSMUSG00000026173_Plcd4	2.43243	-2.11935	1.15383	3.19742	0.0737545	0.16417
ENSMUSG00000026135_Zfp142	213.527	-0.418828	0.163232	6.5023	0.0107735	0.0350723
ENSMUSG00000026172_Bcs1l	112.942	0.717063	0.136032	27.6532	1.45130676912938e-07	1.93533243079732e-06
ENSMUSG00000026171_Rnf25	380.623	-0.204923	0.138946	2.15468	0.142136	0.271366
ENSMUSG00000033276_Stk36	2.33001	-0.411454	1.03359	0.145202	0.703163	0.82387
ENSMUSG00000033257_Ttll4	510.568	-0.998359	0.0866646	131.276	2.15465376452057e-30	4.16463791913761e-28
ENSMUSG00000026170_Cyp27a1	2582.52	0.430097	0.256156	2.5667	0.109135	0.220862
ENSMUSG00000006542_Prkag3	1.75059	-1.61941	3.00622	0.189513	0.663323	NA
ENSMUSG00000033227_Wnt6	17.529	0.570056	0.484655	1.27463	0.258899	0.41877
ENSMUSG00000099472_Gm29539	1.32039	1.37631	1.26523	0.977644	0.322781	NA
ENSMUSG00000026167_Wnt10a	24.9445	-3.41261	0.86345	13.5271	0.000235145	0.00134494
ENSMUSG00000026162_Nhej1	86.5485	-0.0818517	0.201715	0.162644	0.686733	0.812178
ENSMUSG00000026205_Slc23a3	2.48604	0.838944	1.47676	0.276351	0.599103	0.745656
ENSMUSG00000033159_Cnppd1	2858.48	0.12742	0.0501669	6.44556	0.011123	0.0359769
ENSMUSG00000049339_Fam134a	1442.68	-0.0113735	0.0611034	0.0345675	0.852505	0.924173
ENSMUSG00000026197_Zfand2b	790.79	0.0494359	0.0656029	0.566939	0.451478	0.617451
ENSMUSG00000026198_Abcb6	5.27831	-1.70526	0.535048	10.3605	0.00128743	0.00588325
ENSMUSG00000033124_Atg9a	486.337	-0.229008	0.142109	2.55823	0.109721	0.221684
ENSMUSG00000026199_Ankzf1	375.729	-0.545571	0.181051	8.83464	0.00295566	0.0118433
ENSMUSG00000026200_Glb1l	159.354	-0.106255	0.129369	0.672554	0.412163	0.578712
ENSMUSG00000026201_Stk16	1012.73	-0.466055	0.0682133	46.4868	9.22394854565316e-12	2.88170570105672e-10
ENSMUSG00000026202_Tuba4a	6069.11	-0.578897	0.14558	15.2978	9.18242224025767e-05	0.000593349
ENSMUSG00000026203_Dnajb2	1503.42	-0.834952	0.0959718	74.4233	6.3041817250066e-18	4.41769929725662e-16
ENSMUSG00000026204_Ptprn	5.93498	-1.4595	0.716546	4.01488	0.0451005	0.111728
ENSMUSG00000026209_Dnpep	1041.67	0.127266	0.0583963	4.74526	0.0293791	0.079329
ENSMUSG00000026208_Des	122.423	0.157778	0.206811	0.574903	0.448317	0.614946
ENSMUSG00000026207_Speg	9.05299	-0.655604	0.965995	0.352647	0.552619	0.706933
ENSMUSG00000033021_Gmppa	1130.39	0.191368	0.105622	3.25077	0.0713899	0.160209
ENSMUSG00000032997_Chpf	1054.78	-0.930439	0.0734493	158.057	3.00769437604787e-36	1.03730071333933e-33
ENSMUSG00000026211_Obsl1	9.71135	0.280234	0.869847	0.0574537	0.810567	0.898139
ENSMUSG00000051703_Tmem198	62.3581	-1.11419	0.380189	7.67069	0.0056125	0.0203459
ENSMUSG00000032968_Inha	1.05895	-2.04981	3.02079	0.44292	0.505716	NA
ENSMUSG00000026213_Stk11ip	753.574	0.0415681	0.0812591	0.261423	0.609144	0.753463
ENSMUSG00000006576_Slc4a3	9.19668	2.4699	1.47807	0.977617	0.322788	0.488263
ENSMUSG00000026235_Epha4	5.56126	2.59194	1.31666	2.92016	0.0874793	0.187666
ENSMUSG00000032908_Sgpp2	3.0684	-2.28228	1.91375	1.6655	0.196863	0.345088
ENSMUSG00000026245_Farsb	1336.65	0.341482	0.0929584	13.3675	0.000256016	0.0014512
ENSMUSG00000104018_4833412K13Rik	2.94	-1.76269	1.29794	0.878813	0.348527	0.515103
ENSMUSG00000032883_Acsl3	253.04	0.232702	0.135521	2.9336	0.0867538	0.186382
ENSMUSG00000079470_Utp14b	96.9267	0.135925	0.295819	0.1992	0.655368	0.789701
ENSMUSG00000047330_Kcne4	7.18676	3.29394	1.05091	5.71823	0.0167896	0.0505962
ENSMUSG00000072978_Gm5830	3.15691	0.617133	0.726166	0.705803	0.400841	0.567889
ENSMUSG00000054702_Ap1s3	42.8234	-0.413068	0.536348	0.430212	0.511885	0.671155
ENSMUSG00000073643_Wdfy1	1071.89	0.273775	0.157128	2.94889	0.0859365	0.185079
ENSMUSG00000104497_Gm10555	0.860155	0.798359	2.18606	-0.0282075	1	NA
ENSMUSG00000026248_Mrpl44	277.139	0.0186819	0.145641	0.0162415	0.898591	0.952873
ENSMUSG00000026249_Serpine2	45.0437	0.655122	0.54665	1.26695	0.260339	0.420448
ENSMUSG00000067106_Gm5529	0.985832	0.35848	1.60009	0.00890403	0.924822	NA
ENSMUSG00000043230_Fam124b	44.7645	-2.11064	0.63165	10.7343	0.00105168	0.00494336
ENSMUSG00000004364_Cul3	3260.38	-0.269305	0.0928048	8.35388	0.00384865	0.0147771
ENSMUSG00000103076_Gm37902	2.11853	-4.45592	2.42204	-0.886936	1	1
ENSMUSG00000103525_Gm37262	2.01529	-3.95558	1.43839	7.54407	0.00602079	0.021577
ENSMUSG00000101483_1700016L21Rik	19.6244	-3.22491	0.672342	20.6654	5.4694586484204e-06	4.92335251622653e-05
ENSMUSG00000038608_Dock10	7512.29	-0.202444	0.0719306	7.87711	0.00500643	0.0184957
ENSMUSG00000103192_Gm37645	8.34368	-0.932741	1.05521	0.516968	0.472138	0.636648
ENSMUSG00000104488_Gm38062	19.1898	0.229985	0.537502	0.164495	0.685051	0.811405
ENSMUSG00000102721_A630081D01Rik	18.9834	0.437557	0.647045	0.34656	0.556067	0.709219
ENSMUSG00000087008_Gm5530	2.49001	0.378875	0.716529	0.270856	0.602758	0.748399
ENSMUSG00000026142_Rhbdd1	617.404	0.133596	0.115939	1.32609	0.249502	0.408272
ENSMUSG00000104493_Gm19552	2.50331	-0.301202	0.982819	0.108095	0.742323	0.851544
ENSMUSG00000079465_Col4a3	2.12984	0.579931	1.42065	0.0662492	0.796878	0.888738
ENSMUSG00000097564_C430014B12Rik	1.61517	1.86046	2.99574	0.477554	0.489532	NA
ENSMUSG00000026150_Mff	2058.52	0.138206	0.0645209	4.57443	0.0324525	0.0860639
ENSMUSG00000100170_Gm28942	2.10339	-2.99746	1.17337	6.02615	0.0140954	0.0438184
ENSMUSG00000100744_Gm17764	1.6605	-2.71929	1.14424	5.39908	0.0201474	NA
ENSMUSG00000026159_Agfg1	2226.86	-0.0923536	0.0460372	4.02076	0.0449435	0.111424
ENSMUSG00000026166_Ccl20	12.6737	0.692583	0.84944	0.555961	0.455892	0.621315
ENSMUSG00000045658_Pid1	2689.17	0.564283	0.256886	4.35705	0.0368561	0.0954495
ENSMUSG00000036766_Dner	0.652132	0.592685	3.02926	0.0573271	0.810772	NA
ENSMUSG00000026219_Trip12	1893.37	-0.0551999	0.055895	0.973352	0.323846	0.489357
ENSMUSG00000104503_Gm37738	1.77296	2.42301	1.31294	4.09578	0.0429904	NA
ENSMUSG00000073633_Fbxo36	30.0519	-0.859338	0.362618	5.23988	0.0220748	0.0631956
ENSMUSG00000026220_Slc16a14	25.5652	1.5583	0.572388	7.21237	0.00724026	0.0252426
ENSMUSG00000096802_Gm15433	10.7922	0.801682	0.532789	2.25256	0.133393	0.258427
ENSMUSG00000052477_C130026I21Rik	5.79143	0.228927	0.620948	0.133527	0.714803	0.832788
ENSMUSG00000064281_Rpl19-ps1	2.28861	0.454121	0.72284	0.390717	0.531923	0.68941
ENSMUSG00000061852_Gm7582	5.66064	-0.63949	0.735151	0.682917	0.408584	0.575525
ENSMUSG00000101279_Gm18342	9.89454	-0.126434	0.460689	0.0720587	0.788363	0.883442
ENSMUSG00000089844_A530032D15Rik	131.147	0.416232	0.318192	1.57924	0.20887	0.35986
ENSMUSG00000073631_Gm10553	0.93186	-0.48212	1.244	0.18121	0.670336	NA
ENSMUSG00000072109_A530040E14Rik	244.416	0.248236	0.250663	0.923266	0.336619	0.503297
ENSMUSG00000079457_Gm7609	27.45	0.450513	0.405321	1.1777	0.277825	0.439712
ENSMUSG00000079455_Gm16026	2.01506	0.797411	0.86005	0.826098	0.363403	0.529975
ENSMUSG00000090186_Gm7592	24.9257	-0.242403	0.358692	0.452958	0.500934	0.661729
ENSMUSG00000070034_Sp110	2221.47	0.23338	0.132875	3.02056	0.0822153	0.178971
ENSMUSG00000090103_Gm16094	2.90798	0.144533	0.725542	0.0383746	0.844693	0.918876
ENSMUSG00000070031_Sp140	1752.69	0.0663955	0.268103	0.0556313	0.813539	0.899281
ENSMUSG00000073628_Gm10552	4.32885	0.0283306	0.707501	0.00154857	0.96861	0.993346
ENSMUSG00000090246_Gm17017	9.57742	-1.03895	0.616408	2.46512	0.116399	0.232739
ENSMUSG00000026222_Sp100	9094.3	0.328707	0.126069	6.66315	0.00984267	0.032548
ENSMUSG00000052760_A630001G21Rik	360.143	-0.297816	0.228757	1.62047	0.203026	0.352973
ENSMUSG00000036707_Cab39	3979.86	-0.263568	0.0805655	10.6274	0.00111423	0.00519716
ENSMUSG00000026223_Itm2c	15124.3	-0.222424	0.116263	3.60202	0.0577094	0.135464
ENSMUSG00000026224_4933407L21Rik	0.758343	-1.23978	2.79577	0.00969722	0.921556	NA
ENSMUSG00000099767_Gm28884	3.59966	-1.28544	1.49377	0.709051	0.399759	0.566817
ENSMUSG00000049608_Gpr55	151.734	-0.00103008	0.269136	1.29025470130273e-05	0.997134	1
ENSMUSG00000100108_Gm28100	8.69087	0.363201	0.479377	0.549694	0.458443	0.623776
ENSMUSG00000099342_Gm18180	0.752517	-0.804247	1.81984	0.0502975	0.822546	NA
ENSMUSG00000026226_Spata3	1.20237	-2.86698	2.32771	1.63561	0.200929	NA
ENSMUSG00000026227_2810459M11Rik	243.675	-1.58414	0.961244	2.15698	0.141923	0.271071
ENSMUSG00000026229_Psmd1	3463.47	0.177667	0.0931828	3.62146	0.0570389	0.134346
ENSMUSG00000026228_Htr2b	0.961935	-2.76025	2.51992	1.52697	0.216568	NA
ENSMUSG00000062590_Armc9	98.5996	-0.396271	0.132387	8.95276	0.0027705	0.0112256
ENSMUSG00000087538_Gm16341	6.44292	-1.36517	0.761349	3.31836	0.06851	0.155226
ENSMUSG00000079445_B3gnt7	31.2581	-0.300492	0.633715	0.203339	0.652039	0.786727
ENSMUSG00000026234_Ncl	10705.2	-0.296885	0.0388185	58.3422	2.20266469019974e-14	9.78350233230384e-13
ENSMUSG00000073627_C130036L24Rik	19.1441	-0.116538	0.288149	0.161719	0.687579	0.812648
ENSMUSG00000026237_Nmur1	6.80204	-3.28407	1.06444	9.72224	0.00182051	0.00786756
ENSMUSG00000026238_Ptma	13094.8	0.127828	0.0681729	3.51327	0.0608791	0.141397
ENSMUSG00000026239_Pde6d	645.526	0.328212	0.0922261	12.5688	0.00039225	0.00210665
ENSMUSG00000026240_Cops7b	325.072	0.462154	0.0741356	38.7723	4.76229683711809e-10	1.07527649638087e-08
ENSMUSG00000026241_Nppc	18.0664	1.21033	0.55522	4.28774	0.0383883	0.0986862
ENSMUSG00000053333_Dis3l2	668.85	-0.365505	0.104086	12.2853	0.000456551	0.00240428
ENSMUSG00000100768_Gm29055	1.75084	-0.5215	1.59371	0.131543	0.716837	NA
ENSMUSG00000102383_Gm38142	5.51977	0.855425	0.874749	0.821461	0.364753	0.531713
ENSMUSG00000102649_Gm38021	1.89597	1.27494	1.3664	0.527633	0.467604	0.632619
ENSMUSG00000084106_Gm6136	17.3158	0.161032	0.266557	0.363316	0.54667	0.701802
ENSMUSG00000102571_Gm37967	0.802297	-0.394592	1.87962	0.0965721	0.755983	NA
ENSMUSG00000103984_Gm37447	2.67096	-2.74976	1.22298	4.94041	0.0262359	0.0724432
ENSMUSG00000026247_Ecel1	5.53729	-2.16404	2.24342	-0.00671661	1	1
ENSMUSG00000036480_Prss56	1.5238	3.9523	2.49833	2.8976	0.0887115	NA
ENSMUSG00000026253_Chrng	2.70151	1.80085	1.31042	0.818812	0.365528	0.532621
ENSMUSG00000026254_Eif4e2	2834.66	0.0873517	0.0661748	1.7368	0.187545	0.333273
ENSMUSG00000026255_Efhd1	27.2681	0.857172	0.815455	0.78353	0.376064	0.542936
ENSMUSG00000048000_Gigyf2	873.976	-0.264037	0.126526	4.32969	0.0374532	0.0967774
ENSMUSG00000026288_Inpp5d	9507.54	-0.216682	0.0894856	5.8308	0.015748	0.0480138
ENSMUSG00000026289_Atg16l1	913.358	-0.339073	0.115981	8.51972	0.00351318	0.01365
ENSMUSG00000087968_Gm25395	3.27085	-2.296	0.930281	5.0785	0.0242244	0.0680547
ENSMUSG00000056055_Sag	14.7857	1.43028	0.776843	2.8751	0.0899596	0.191608
ENSMUSG00000070738_Dgkd	1882.46	-0.442508	0.103025	18.2446	1.94273985400822e-05	0.000152958
ENSMUSG00000101942_Gm19582	11.2006	-0.224347	0.452976	0.241447	0.623163	0.763946
ENSMUSG00000103591_Gm38365	14.5576	0.190505	0.404259	0.211965	0.645232	0.780954
ENSMUSG00000005501_Usp40	221.572	-0.175605	0.12022	2.11557	0.145808	0.276718
ENSMUSG00000090124_Ugt1a7c	777.587	0.717814	0.215559	10.3568	0.00128996	0.0058902
ENSMUSG00000054545_Ugt1a6a	7.52279	1.11447	0.545891	3.88598	0.0486907	0.118815
ENSMUSG00000081984_Dnajb3	9.85271	-1.85263	0.727711	5.42413	0.0198603	0.0579885
ENSMUSG00000079429_Mroh2a	27.7324	-0.267774	0.450939	0.332173	0.564382	0.716745
ENSMUSG00000044783_Hjurp	1219.73	-0.190568	0.183259	1.05283	0.304856	0.469291
ENSMUSG00000062310_Glrp1	1.47067	-0.368514	1.89132	0.0627469	0.802206	NA
ENSMUSG00000100798_Gm19589	4.08841	0.22082	1.22033	0.0264539	0.870797	0.936098
ENSMUSG00000104057_Gm38130	3.79104	2.60418	1.51328	0.803965	0.369911	0.537005
ENSMUSG00000100367_Gm29336	19.0666	1.08366	0.371493	8.31517	0.00393154	0.0150494
ENSMUSG00000049866_Arl4c	1440.65	0.638165	0.123522	26.4296	2.73324585318649e-07	3.39273544895534e-06
ENSMUSG00000036206_Sh3bp4	1234.26	0.280623	0.206336	1.78976	0.180955	0.324977
ENSMUSG00000055013_Agap1	287.98	-0.42729	0.17763	5.593	0.0180324	0.0537943
ENSMUSG00000104114_Gm37297	3.70797	-4.14221	1.19886	11.7941	0.000594197	0.00302674
ENSMUSG00000102009_4933400F21Rik	1.23319	-3.4296	1.86477	3.77053	0.052163	NA
ENSMUSG00000034486_Gbx2	1.38322	-0.914942	2.99639	0.0633867	0.801221	NA
ENSMUSG00000092627_D130058E05Rik	1.71946	1.28698	1.68609	0.704729	0.401199	NA
ENSMUSG00000044337_Ackr3	29.1287	-2.09482	1.08181	1.83789	0.175198	0.317262
ENSMUSG00000101028_Gm28723	0.691977	-1.32367	3.03203	0.104051	0.747021	NA
ENSMUSG00000034432_Cops8	1703.18	-0.30416	0.0756633	16.0999	6.00878985595569e-05	0.000414107
ENSMUSG00000048126_Col6a3	6.7403	-0.688533	1.45175	0.0873938	0.767517	0.869954
ENSMUSG00000026303_Mlph	5.8815	1.37882	1.41131	0.0761103	0.782639	0.87955
ENSMUSG00000026305_Lrrfip1	12394.1	-0.105743	0.101787	1.06726	0.301564	0.465977
ENSMUSG00000070732_Rbm44	13.7701	1.0538	0.699283	1.96077	0.161432	0.298446
ENSMUSG00000100018_Gm7776	5.45774	0.113578	0.620776	0.0315954	0.858918	0.928151
ENSMUSG00000034353_Ramp1	1686.76	-0.404748	0.0412877	95.9662	1.16859660951933e-22	1.37029638432236e-20
ENSMUSG00000034343_Ube2f	3268.09	0.603564	0.140984	17.822	2.42568347381632e-05	0.000186965
ENSMUSG00000083064_Gm7785	9.43859	-0.357711	0.468155	0.567531	0.451242	0.617386
ENSMUSG00000026307_Scly	273.917	-0.318933	0.0922671	11.9213	0.000554945	0.0028499
ENSMUSG00000026308_Klhl30	18.2769	-0.863969	0.758361	1.40609	0.235707	0.39182
ENSMUSG00000047443_Erfe	2.67482	-3.44896	1.69897	2.01271	0.155987	0.290949
ENSMUSG00000026309_Ilkap	1151.71	-0.0914525	0.0608529	2.25701	0.13301	0.257971
ENSMUSG00000067071_Hes6	520.947	0.467402	0.0793731	34.5494	4.1556713556532e-09	7.75945896757793e-08
ENSMUSG00000055866_Per2	86.1492	-1.04715	0.315132	9.87091	0.00167912	0.0073651
ENSMUSG00000034292_Traf3ip1	43.9987	0.17336	0.398463	0.171931	0.678402	0.806448
ENSMUSG00000026311_Asb1	269.27	-0.350529	0.145449	5.78068	0.0162033	0.0491124
ENSMUSG00000026313_Hdac4	566.555	-0.191803	0.107259	3.16644	0.0751659	0.166511
ENSMUSG00000026260_Ndufa10	1961.8	0.117802	0.0844993	1.93046	0.164709	0.302976
ENSMUSG00000073616_Cops9	1375.32	0.371731	0.13051	8.04049	0.00457433	0.0171698
ENSMUSG00000044055_Otos	3.3376	-1.78769	1.36671	0.898945	0.343065	0.509513
ENSMUSG00000034220_Gpc1	1169.7	-0.180665	0.19107	0.851503	0.356128	0.522735
ENSMUSG00000034212_Ankmy1	8.49605	-4.07787	0.966441	15.8622	6.8127094871065e-05	0.000461768
ENSMUSG00000047067_Dusp28	95.0074	-0.130757	0.204844	0.398419	0.527907	0.685873
ENSMUSG00000097251_5033417F24Rik	8.07718	0.289924	0.691309	0.148425	0.700045	0.821547
ENSMUSG00000026269_Rnpepl1	1305.2	0.207594	0.0810479	6.55046	0.0104857	0.0343131
ENSMUSG00000100632_9430060I03Rik	5.69995	0.132431	0.800056	0.0267614	0.870055	0.935587
ENSMUSG00000026270_Capn10	227.56	0.164388	0.132457	1.52168	0.217365	0.369931
ENSMUSG00000026271_Gpr35	5381.26	0.444212	0.224108	3.67874	0.0551105	0.130903
ENSMUSG00000045091_Aqp12	1.26034	2.22909	1.34128	2.40002	0.121334	NA
ENSMUSG00000014602_Kif1a	262.015	3.26462	0.501226	32.3391	1.29484606609921e-08	2.17526718783372e-07
ENSMUSG00000084989_Crocc2	1.04972	-1.56706	3.01915	0.0582793	0.809237	NA
ENSMUSG00000047793_Sned1	57.176	-0.528234	0.260388	3.97701	0.0461254	0.113898
ENSMUSG00000026273_Mterf4	119.34	-0.301589	0.128233	5.52753	0.0187195	0.0552909
ENSMUSG00000026274_Pask	70.0031	-0.520723	0.299429	2.86261	0.0906602	0.192797
ENSMUSG00000026275_Ppp1r7	991.788	0.0307777	0.104547	0.0865577	0.7686	0.870464
ENSMUSG00000034107_Ano7	4.99871	-0.686455	0.833489	0.78618	0.375258	0.542351
ENSMUSG00000034088_Hdlbp	4154.69	-0.308439	0.0962305	10.184	0.00141666	0.00637442
ENSMUSG00000026276_Sept2	12.356	0.518662	0.440099	1.30629	0.253068	0.412493
ENSMUSG00000034066_Farp2	103.824	-0.972544	0.359449	6.92821	0.00848464	0.028749
ENSMUSG00000026277_Stk25	1601.2	-0.132399	0.108967	1.46825	0.225622	0.379634
ENSMUSG00000026278_Bok	15.7306	1.11257	0.519434	4.07507	0.0435206	0.10878
ENSMUSG00000026279_Thap4	204.315	0.277026	0.244738	1.21464	0.270414	0.431412
ENSMUSG00000026280_Atg4b	1182.08	-0.183513	0.0479134	14.6592	0.000128807	0.000795777
ENSMUSG00000026281_Dtymk	646.107	0.197298	0.0910237	4.68789	0.030376	0.0813964
ENSMUSG00000026283_Ing5	808.326	-0.282271	0.117948	5.71074	0.0168614	0.0507661
ENSMUSG00000073609_D2hgdh	216.854	-0.348307	0.115492	9.04296	0.00263709	0.0107619
ENSMUSG00000094651_Gal3st2	25.8753	-0.139372	0.430819	0.0909504	0.762972	0.866696
ENSMUSG00000093805_Gm9994	7.00122	-0.736672	0.519945	1.99614	0.157701	0.293199
ENSMUSG00000073608_Gm6086	9.50768	-0.793776	0.545509	2.04763	0.152443	0.285879
ENSMUSG00000026285_Pdcd1	1033.66	-1.11189	0.249518	17.947	2.27144528522401e-05	0.000176313
ENSMUSG00000100347_Gm7895	0.794229	-0.853822	1.43428	0.261089	0.609373	NA
ENSMUSG00000051185_Fam174a	2393.11	0.232256	0.131867	3.04104	0.081184	0.177208
ENSMUSG00000103973_BC055308	19.292	-0.212231	0.462026	0.184535	0.667505	0.798147
ENSMUSG00000081051_Gm15427	251.611	0.323633	0.213477	2.25977	0.132774	0.257596
ENSMUSG00000040710_St8sia4	4110.06	-0.0990483	0.0396188	6.24693	0.0124409	0.0394488
ENSMUSG00000103197_Gm37642	24.837	-0.858239	0.528978	2.47382	0.115756	0.231631
ENSMUSG00000040693_Slco4c1	15.1493	1.0923	0.992353	0.889382	0.345645	0.512091
ENSMUSG00000097814_Panct2	9.78817	-0.667832	0.574889	1.43542	0.230882	0.386393
ENSMUSG00000044757_Gm6430	2.33562	-1.09567	0.82928	1.59039	0.20727	0.358121
ENSMUSG00000044768_D1Ertd622e	1802.94	0.127172	0.110621	1.30545	0.25322	0.412588
ENSMUSG00000040648_Ppip5k2	1040.25	0.0697791	0.0945856	0.540577	0.462194	0.627423
ENSMUSG00000026333_Gin1	135.25	-0.118202	0.176141	0.448481	0.503057	0.663438
ENSMUSG00000026335_Pam	72.175	0.282324	0.160739	3.07101	0.0797002	0.174685
ENSMUSG00000089782_Gm3531	19.9307	0.0318655	0.246661	0.0166244	0.897409	0.952079
ENSMUSG00000089706_B230216N24Rik	7.42938	0.129803	0.655404	0.0351018	0.851382	0.923412
ENSMUSG00000100182_1810006J02Rik	29.6746	-0.48884	0.401425	1.44729	0.228964	0.383913
ENSMUSG00000100711_Gm29461	4.11566	-2.51915	1.99898	0.592835	0.441325	0.608248
ENSMUSG00000100009_Gm7967	4.64146	-2.23663	0.814898	6.51473	0.0106985	0.0348925
ENSMUSG00000099686_Gm29460	0.878126	-2.31753	3.02659	0.671388	0.412568	NA
ENSMUSG00000082431_Tdpx-ps1	5.1426	-0.148009	0.50426	0.0844625	0.771339	0.872005
ENSMUSG00000099835_Gm29668	0.805623	0.266058	1.71652	0.0198774	0.88788	NA
ENSMUSG00000099375_Gm28187	1.44652	-0.309755	0.977689	0.0955503	0.757236	NA
ENSMUSG00000050840_Cdh20	10.6414	-2.03984	1.01908	2.69616	0.10059	0.207841
ENSMUSG00000047496_Rnf152	16.2562	-0.159988	0.746504	0.035593	0.850358	0.922719
ENSMUSG00000101214_Gm28403	0.739351	-2.8283	3.00776	-0.998366	1	NA
ENSMUSG00000067017_Gm3608	32.2209	0.0431955	0.243845	0.0312279	0.859733	0.92862
ENSMUSG00000056536_Pign	395.57	0.168563	0.164884	1.02156	0.312149	0.477587
ENSMUSG00000026319_2310035C23Rik	823.791	-0.0723024	0.0619923	1.35855	0.243789	0.401757
ENSMUSG00000104044_Gm37566	2.54317	1.53253	2.75818	0.00438171	0.947223	0.980272
ENSMUSG00000101330_Gm10193	1.29389	-0.847462	1.07079	0.636882	0.424842	NA
ENSMUSG00000026321_Tnfrsf11a	968.641	0.588204	0.119164	24.0043	9.61188727617089e-07	1.05598679138395e-05
ENSMUSG00000099843_Gm7160	39.5465	0.340818	0.267778	1.6153	0.203748	0.353879
ENSMUSG00000038866_Zcchc2	936.709	0.114721	0.149958	0.572477	0.449276	0.615733
ENSMUSG00000101583_Gm20753	4.21152	-0.116826	0.59427	0.037632	0.846184	0.919986
ENSMUSG00000044340_Phlpp1	699.893	-0.153601	0.0787358	3.80154	0.0512054	0.123631
ENSMUSG00000103291_Gm38235	21.1565	0.60179	0.447078	1.78534	0.181495	0.32568
ENSMUSG00000100247_A530053M12Rik	3.66874	1.7742	1.49462	1.48187	0.223483	0.377022
ENSMUSG00000057329_Bcl2	1056.73	-0.973474	0.142295	45.1488	1.82613937955728e-11	5.3003243476952e-10
ENSMUSG00000054006_D630008O14Rik	2.69617	-0.409771	1.65829	-0.284513	1	1
ENSMUSG00000009905_Kdsr	474.581	-0.602098	0.104738	32.8653	9.87729403902848e-09	1.69329166522877e-07
ENSMUSG00000009907_Vps4b	3463.5	-0.0747571	0.0799768	0.872228	0.350339	0.516913
ENSMUSG00000067001_Serpinb7	0.695327	-0.587533	3.01568	0.0315762	0.858961	NA
ENSMUSG00000062345_Serpinb2	1978.44	-0.433103	0.455586	0.856359	0.35476	0.521379
ENSMUSG00000092572_Serpinb10	90.3978	-0.549606	0.334033	2.43962	0.118305	0.235552
ENSMUSG00000026315_Serpinb8	703.701	-0.167975	0.51027	0.0782982	0.779617	0.877387
ENSMUSG00000038702_Dsel	39.7544	-0.757404	0.309978	5.89863	0.0151526	0.0464644
ENSMUSG00000026374_Tsn	2182.81	-0.0500424	0.0433508	1.33171	0.2485	0.407199
ENSMUSG00000026377_Nifk	1199.28	-0.584325	0.0775897	56.2488	6.38564615275084e-14	2.6303777559891e-12
ENSMUSG00000064302_Clasp1	982.948	0.0703921	0.109748	0.407016	0.523488	0.681895
ENSMUSG00000107722_2900060B14Rik	10.2139	-0.103006	0.426994	0.0563091	0.812428	0.899082
ENSMUSG00000026380_Tfcp2l1	2.4774	-2.72531	2.01827	1.5264	0.216654	0.36913
ENSMUSG00000048402_Gli2	2.04574	-2.52913	3.00326	0.521399	0.470246	0.634979
ENSMUSG00000037035_Inhbb	5.58927	-5.61503	1.56238	10.5031	0.00119178	0.005512
ENSMUSG00000004451_Ralb	2484.49	0.722724	0.168057	17.699	2.58767262517693e-05	0.000197803
ENSMUSG00000098447_Gm27184	2.12401	-1.19852	1.11316	1.02379	0.311621	0.476866
ENSMUSG00000098923_Tmem185b	1038.44	0.135122	0.106818	1.58578	0.20793	0.35898
ENSMUSG00000101731_3830432H09Rik	0.830959	-0.814258	3.02092	0.069902	0.79148	NA
ENSMUSG00000026383_Epb41l5	57.6562	1.27348	0.839792	1.09478	0.295415	0.459461
ENSMUSG00000026384_Ptpn4	186.621	-0.179973	0.225708	0.622246	0.430214	0.596722
ENSMUSG00000103146_Gm37745	1.72761	-1.93424	1.43387	1.79968	0.179751	NA
ENSMUSG00000036975_Tmem177	53.6032	-0.111351	0.301357	0.1286	0.719888	0.836059
ENSMUSG00000050777_Tmem37	119.2	1.03042	0.297212	11.7645	0.000603705	0.00306275
ENSMUSG00000026385_Dbi	2330.85	0.708383	0.177687	15.3436	8.96246142926362e-05	0.000580629
ENSMUSG00000026388_3110009E18Rik	42.1684	0.172301	0.229341	0.557192	0.455394	0.621015
ENSMUSG00000026389_Steap3	68.5158	1.55853	0.21474	52.3331	4.68405448966405e-13	1.72720826873587e-11
ENSMUSG00000026390_Marco	229.859	-0.791206	0.150051	27.1582	1.87468996457144e-07	2.42277162283961e-06
ENSMUSG00000003721_Insig2	530.855	0.221618	0.123708	3.16816	0.0750871	0.166378
ENSMUSG00000104253_Gm37174	8.05299	-1.84403	1.58248	-0.217372	1	1
ENSMUSG00000026339_Ccdc93	338.682	-0.145847	0.146704	0.98043	0.322093	0.487558
ENSMUSG00000001674_Ddx18	766.529	-0.147322	0.0522436	7.9439	0.00482497	0.017927
ENSMUSG00000036815_Dpp10	58.6727	-0.584963	0.193201	9.1036	0.00255107	0.0104618
ENSMUSG00000102902_Gm38263	0.769887	-0.530676	1.78775	0.105739	0.745048	NA
ENSMUSG00000026341_Actr3	32062.9	0.386566	0.0971773	15.6125	7.7739349580787e-05	0.000515789
ENSMUSG00000102063_Gm28706	1.02379	2.80453	2.14358	2.20352	0.137696	NA
ENSMUSG00000026342_Slc35f5	473.004	0.524347	0.169905	9.23564	0.00237349	0.00981598
ENSMUSG00000049690_Nckap5	4.65732	-3.43497	2.26663	1.61797	0.203375	0.35344
ENSMUSG00000036155_Mgat5	489.54	-0.165437	0.129641	1.60568	0.2051	0.355498
ENSMUSG00000104378_Gm37510	7.46574	-0.892011	1.07123	0.516507	0.472336	0.636719
ENSMUSG00000099471_Gm8451	30.489	0.330531	0.335268	0.950306	0.329641	0.495603
ENSMUSG00000026347_Tmem163	66.433	0.103151	0.55531	0.0343046	0.85306	0.924604
ENSMUSG00000026349_Ccnt2	1263.07	-0.151441	0.0659504	5.25821	0.0218435	0.0626252
ENSMUSG00000051590_Map3k19	3.20482	-0.295808	1.77625	0.0146574	0.903637	0.955739
ENSMUSG00000036104_Rab3gap1	900.762	-0.390322	0.130733	8.84136	0.0029448	0.0118121
ENSMUSG00000036086_Zranb3	159.765	-0.161236	0.215743	0.552578	0.457266	0.622657
ENSMUSG00000099760_Gm28800	1.38812	-0.0449625	1.13095	0.00819662	0.927862	NA
ENSMUSG00000104164_Gm38248	16.6367	0.329328	0.71523	0.168154	0.681758	0.809085
ENSMUSG00000058603_Rpl28-ps1	59.2096	0.518299	0.268478	3.68582	0.0548769	0.130525
ENSMUSG00000056211_R3hdm1	688.748	-0.265645	0.17119	2.36584	0.124017	0.244299
ENSMUSG00000103497_Gm37407	4.5155	1.2208	0.869633	1.41169	0.234776	0.390974
ENSMUSG00000026353_Ubxn4	2954.99	-0.233533	0.0544296	18.3695	1.81946712085691e-05	0.000143767
ENSMUSG00000026354_Lct	0.739198	-1.67376	3.0261	0.467657	0.494067	NA
ENSMUSG00000026355_Mcm6	3113.73	-0.286167	0.157981	3.25522	0.0711964	0.159892
ENSMUSG00000026356_Dars	2820.99	-0.0280783	0.0956425	0.0857764	0.769617	0.870981
ENSMUSG00000100078_Gm6170	12.15	-0.432303	0.381186	1.25127	0.26331	0.423536
ENSMUSG00000045382_Cxcr4	1745.09	0.688725	0.150572	20.5027	5.95460782143201e-06	5.30306820107178e-05
ENSMUSG00000042581_Thsd7b	43.0955	-1.11085	0.333606	11.0607	0.000881785	0.00424459
ENSMUSG00000086633_Gm16081	0.804611	-1.08375	2.03647	0.353439	0.552173	NA
ENSMUSG00000086825_Gm15675	1.59001	-0.514613	1.20734	0.190656	0.662371	NA
ENSMUSG00000026399_Cd55	234.637	-1.64103	0.169227	91.1354	1.34168888373124e-21	1.4131117231107e-19
ENSMUSG00000026409_Pfkfb2	30.4726	-0.188911	0.656269	0.0674474	0.79509	0.887588
ENSMUSG00000046404_Yod1	213.454	-0.507042	0.171268	8.68167	0.00321426	0.0126847
ENSMUSG00000042510_AA986860	5.41354	0.511733	0.809605	0.397535	0.528365	0.686266
ENSMUSG00000026415_Fcamr	7.22578	2.08845	0.865334	5.47872	0.0192493	0.0565587
ENSMUSG00000086706_Gm15848	4.2581	1.1486	0.845301	1.63064	0.201615	0.351357
ENSMUSG00000026417_Pigr	2.28516	-3.76962	2.44648	2.51893	0.112487	0.226247
ENSMUSG00000042474_Fcmr	47.9042	-1.48358	0.277497	27.2407	1.79635990755587e-07	2.33699514896451e-06
ENSMUSG00000016529_Il10	88.4897	1.14605	0.232559	23.7116	1.11906288731344e-06	1.20607825520564e-05
ENSMUSG00000016528_Mapkapk2	15172.9	0.0167795	0.116784	0.0203193	0.886649	0.945717
ENSMUSG00000102856_Gm37084	14.8034	-0.267763	0.485061	0.290785	0.589718	0.737262
ENSMUSG00000016526_Dyrk3	191.013	-0.359808	0.155709	5.23358	0.0221548	0.0633814
ENSMUSG00000026427_Eif2d	717.532	-0.36251	0.0942907	14.6971	0.000126241	0.000783506
ENSMUSG00000026430_Rassf5	5316.55	-0.161218	0.0920719	3.03888	0.0812919	0.177377
ENSMUSG00000042349_Ikbke	675.507	-1.2901	0.260211	22.4803	2.12315277107018e-06	2.12544872455056e-05
ENSMUSG00000102055_Gm28913	1.68013	-0.604353	1.39352	0.125725	0.722906	NA
ENSMUSG00000026425_Srgap2	1719.6	0.18745	0.10146	3.3762	0.0661443	0.151092
ENSMUSG00000104060_Gm37954	4.4911	1.2887	0.619433	4.26797	0.0388373	0.0995641
ENSMUSG00000101778_Gm29488	1.79563	-3.34236	2.15183	2.26403	0.132409	NA
ENSMUSG00000055184_Fam72a	38.4703	0.0736411	0.216243	0.114427	0.73516	0.846695
ENSMUSG00000004552_Ctse	382.364	-0.432203	0.11781	13.31	0.000264	0.00149069
ENSMUSG00000052688_Rab7b	12905.5	0.718847	0.420148	2.33182	0.126753	0.248658
ENSMUSG00000042268_Slc26a9	8.71945	2.42679	1.12999	1.48322	0.223272	0.376884
ENSMUSG00000042251_Pm20d1	0.729103	1.63912	3.03032	0.345429	0.556712	NA
ENSMUSG00000013275_Slc41a1	3031.94	-0.653492	0.112441	33.2637	8.04727189242252e-09	1.41120105000817e-07
ENSMUSG00000026433_Rab29	810.604	0.80026	0.162162	23.4907	1.25516884635871e-06	1.3355816599276e-05
ENSMUSG00000026434_Nucks1	1438.71	-0.0702596	0.0744526	0.887053	0.346277	0.512812
ENSMUSG00000026435_Slc45a3	136.023	-1.36121	0.329975	15.3774	8.8033095295545e-05	0.000571581
ENSMUSG00000026436_Elk4	584.061	-0.27048	0.138272	3.75925	0.0525163	0.126323
ENSMUSG00000059149_Mfsd4a	165.119	0.0146289	0.175033	0.00687791	0.933905	0.973142
ENSMUSG00000026437_Cdk18	34.27	-0.126301	0.296439	0.174398	0.676232	0.804918
ENSMUSG00000089808_Gm7241	1.00588	-0.140542	1.45554	0.0339079	0.853903	NA
ENSMUSG00000042115_Klhdc8a	8.66206	-1.05141	0.917547	1.20872	0.271586	0.432888
ENSMUSG00000009772_Nuak2	6568.95	0.146738	0.161871	0.794022	0.372887	0.539856
ENSMUSG00000100658_F730311O21Rik	6.8762	-2.58901	0.651894	15.3019	9.16264985732697e-05	0.000592289
ENSMUSG00000042066_Tmcc2	124.92	0.922593	0.239471	14.4967	0.000140408	0.000857514
ENSMUSG00000042046_Dstyk	326.844	0.711725	0.13333	28.049	1.18282958842838e-07	1.60407013345156e-06
ENSMUSG00000097760_6030442K20Rik	1.49683	2.13015	1.30111	2.76354	0.0964349	NA
ENSMUSG00000026439_Rbbp5	615.113	0.350222	0.0555646	39.689	2.97791215944606e-10	6.93754926788035e-09
ENSMUSG00000048174_Tmem81	24.1125	0.654126	0.357339	3.14143	0.0763267	0.168763
ENSMUSG00000026442_Nfasc	0.749147	0.688708	2.19324	0.127354	0.721191	NA
ENSMUSG00000026443_Lrrn2	43.7352	-1.00143	0.309177	10.4745	0.00121032	0.00558747
ENSMUSG00000054387_Mdm4	962.728	-0.171684	0.0872691	3.85531	0.0495887	0.120571
ENSMUSG00000100228_Gm29257	1.03264	0.243308	1.42579	0.0318784	0.858295	NA
ENSMUSG00000026447_Pik3c2b	17.1104	-0.2046	1.1124	0.0141297	0.90538	0.956762
ENSMUSG00000102425_Gm26616	26.5617	-0.509967	0.234792	4.70621	0.0300539	0.0807543
ENSMUSG00000046062_Ppp1r15b	3452.94	0.050767	0.0898928	0.31652	0.573707	0.724715
ENSMUSG00000041757_Plekha6	17.1365	0.230686	1.04767	0.0388976	0.843652	0.918141
ENSMUSG00000070644_Etnk2	61.3171	-1.41022	0.19729	50.6516	1.10308210556748e-12	3.91171595863436e-11
ENSMUSG00000070643_Sox13	46.7427	-3.00629	1.42547	1.85756	0.172907	0.314245
ENSMUSG00000090553_Snrpe	1591.12	0.337714	0.114556	8.64004	0.00328854	0.012917
ENSMUSG00000102976_Zc3h11a	207.202	-0.537263	0.091725	34.285	4.76044436807697e-09	8.7585205010571e-08
ENSMUSG00000094410_Gm38394	6.39829	-0.0415552	0.512417	0.00622989	0.937089	0.975016
ENSMUSG00000051998_Lax1	558.209	-0.231062	0.204762	1.25548	0.262508	0.422671
ENSMUSG00000026463_Atp2b4	136.144	-0.166333	0.333066	0.220642	0.638551	0.776351
ENSMUSG00000102509_Gm37368	2.35148	0.110709	1.09413	0.0121115	0.912368	0.96079
ENSMUSG00000041577_Prelp	3.64781	0.345151	2.79606	0.00843301	0.926832	0.969087
ENSMUSG00000041559_Fmod	3.29592	3.50357	1.35623	5.0988	0.0239424	0.0674227
ENSMUSG00000020423_Btg2	43828.4	0.0687032	0.115357	0.350301	0.553943	0.708037
ENSMUSG00000102380_Gm38140	2.32303	-0.623601	1.43199	0.197725	0.656563	0.790221
ENSMUSG00000026450_Chit1	3.54238	1.43897	1.81534	0.124704	0.723988	0.839282
ENSMUSG00000064246_Chil1	12.7838	0.299157	1.30992	0.0506143	0.821998	0.904051
ENSMUSG00000026458_Ppfia4	1512.1	0.892403	0.207863	17.3145	3.16767787545153e-05	0.000235886
ENSMUSG00000042305_Tmem183a	1440.95	-0.230438	0.0635229	13.1305	0.000290523	0.00161863
ENSMUSG00000026456_Cyb5r1	1293.87	0.264413	0.192327	1.79808	0.179945	0.32363
ENSMUSG00000026457_Adipor1	4635.9	0.140968	0.0679686	4.28642	0.038418	0.0987481
ENSMUSG00000102722_Gm37935	1.16924	0.148703	2.9901	0.0017357	0.966768	NA
ENSMUSG00000026455_Klhl12	230.427	-0.968219	0.142138	45.7495	1.34382114267886e-11	3.98591400987833e-10
ENSMUSG00000042229_Rabif	669.517	0.0652877	0.154795	0.175919	0.674905	0.803771
ENSMUSG00000042207_Kdm5b	473.908	-0.00454544	0.201279	0.000490341	0.982333	1
ENSMUSG00000073557_Ppp1r12b	172.608	-0.444765	0.236123	3.43653	0.0637693	0.146888
ENSMUSG00000103614_Gm37949	1.58317	-1.56366	2.14021	-0.732862	1	NA
ENSMUSG00000103976_Gm37677	1.00245	3.07572	1.9844	2.81568	0.0933472	NA
ENSMUSG00000026429_Ube2t	174.468	0.23196	0.182409	1.61286	0.20409	0.354297
ENSMUSG00000097993_Ptprv	265.735	-0.987222	0.302483	9.70838	0.0018343	0.00791742
ENSMUSG00000031506_Ptpn7	1408	-0.780178	0.0947792	66.5497	3.41179748777602e-16	1.85789801896261e-14
ENSMUSG00000026426_Arl8a	2442.49	0.516516	0.119468	18.359	1.82954898997888e-05	0.000144499
ENSMUSG00000087721_Gm26280	2.26796	0.362629	0.812922	0.182168	0.669517	0.799737
ENSMUSG00000085311_Gm15445	10.8451	0.576854	0.497308	1.21665	0.270019	0.431074
ENSMUSG00000079139_Gm4204	97.9583	0.178817	0.148211	1.44998	0.228532	0.383371
ENSMUSG00000097680_Gm26642	1.95441	-3.14157	1.71723	3.41374	0.0646556	0.148521
ENSMUSG00000003051_Elf3	1.64508	-2.8091	2.79858	0.95452	0.328571	NA
ENSMUSG00000041926_Rnpep	2489.74	0.632887	0.172836	12.8044	0.00034581	0.00188311
ENSMUSG00000062580_Timm17a	1125.95	0.0202875	0.053012	0.14645	0.701951	0.822889
ENSMUSG00000041889_Shisa4	2.91897	3.25141	1.28395	6.45705	0.0110513	0.0358166
ENSMUSG00000041879_Ipo9	1113.47	-0.0578933	0.12455	0.214021	0.643633	0.779909
ENSMUSG00000009418_Nav1	1745.68	0.308924	0.153607	3.93687	0.0472386	0.116061
ENSMUSG00000102474_2610012C04Rik	1.21856	-5.19925	2.62249	-0.674938	1	NA
ENSMUSG00000104524_Gm37333	6.78134	0.479905	0.728685	0.408177	0.522896	0.681412
ENSMUSG00000054412_Gm4793	3.99624	-1.33496	1.61031	0.696941	0.403813	0.570633
ENSMUSG00000026421_Csrp1	4187.22	-0.0836237	0.0406962	4.22051	0.0399383	0.101631
ENSMUSG00000041801_Phlda3	44.4112	0.142706	0.390742	0.114273	0.735331	0.846836
ENSMUSG00000026418_Tnni1	13.4652	-1.53325	0.515244	7.91831	0.0048937	0.0181326
ENSMUSG00000041782_Lad1	1311.95	0.337125	0.197885	2.80729	0.0938369	0.197759
ENSMUSG00000026414_Tnnt2	7.15341	-0.555309	1.42589	0.00542906	0.941263	0.976746
ENSMUSG00000026413_Pkp1	2.33867	3.86058	2.18921	1.09171	0.296094	0.460232
ENSMUSG00000051985_Igfn1	1.67617	-2.60015	3.00884	0.608205	0.435465	NA
ENSMUSG00000026411_Tmem9	149.331	-0.0783724	0.294621	0.0654709	0.798049	0.889593
ENSMUSG00000102717_Gm37759	45.6847	-0.0357231	0.365581	0.00924449	0.923403	0.966942
ENSMUSG00000041642_Kif21b	571.41	-0.351788	0.198689	3.03897	0.0812874	0.177377
ENSMUSG00000041605_5730559C18Rik	4.32487	-1.70266	1.73932	0.848727	0.356913	0.523255
ENSMUSG00000102941_Gm37552	5.25656	-0.663571	0.672771	1.05925	0.303386	0.467859
ENSMUSG00000097433_Gm26781	4.94464	0.0166409	0.613966	0.000699925	0.978894	0.999348
ENSMUSG00000052759_Gpr25	1.7603	0.039637	1.22923	0.00110668	0.973462	NA
ENSMUSG00000041570_Camsap2	395.028	-0.512317	0.138489	13.4938	0.000239355	0.001366
ENSMUSG00000097403_9230116N13Rik	18.173	1.05391	0.648261	2.39321	0.121863	0.241203
ENSMUSG00000026404_Ddx59	149.779	0.370849	0.0903747	16.8495	4.04631220571683e-05	0.000292402
ENSMUSG00000041498_Kif14	21.3544	1.14285	1.16118	0.783151	0.376179	0.543058
ENSMUSG00000104509_Gm33994	1.98705	-2.00303	1.13151	2.92988	0.0869539	0.186753
ENSMUSG00000041483_Zfp281	937.411	-0.51075	0.0696596	53.5808	2.48176063881712e-13	9.48949736438138e-12
ENSMUSG00000097113_Gm19705	4.61912	-0.00913219	0.764337	0.000133821	0.99077	1
ENSMUSG00000026398_Nr5a2	0.741528	-2.16273	3.02753	0.692569	0.405292	NA
ENSMUSG00000098243_Gm4258	4.18164	-0.669635	0.722544	0.826074	0.36341	0.529975
ENSMUSG00000103038_Gm37124	1.13502	-1.90983	1.92804	0.79107	0.373777	NA
ENSMUSG00000102142_Gm26930	1.16971	0.88819	1.45089	0.258309	0.611284	NA
ENSMUSG00000103427_Gm37534	2.43387	-0.281109	1.96044	0.0324528	0.857037	0.926859
ENSMUSG00000026395_Ptprc	35964.7	0.232449	0.0860113	7.239	0.00713367	0.0249154
ENSMUSG00000104291_A130071D04Rik	93.3484	-0.260868	0.328539	0.616891	0.432205	0.598782
ENSMUSG00000026394_Atp6v1g3	2.20859	-0.424244	1.00727	0.193119	0.660333	0.792905
ENSMUSG00000026393_Nek7	2827.09	0.0143439	0.0984982	0.0211443	0.884387	0.944553
ENSMUSG00000102448_Gm37101	3.01633	-1.16301	1.58756	0.618642	0.431552	0.598248
ENSMUSG00000079283_2310009B15Rik	125.293	0.603226	0.217734	7.52674	0.00607898	0.0217368
ENSMUSG00000102365_Gm37045	1.76243	-0.402459	1.34361	0.0962956	0.756321	NA
ENSMUSG00000056268_Dennd1b	1132.78	-0.211102	0.0507705	17.2616	3.25697812182167e-05	0.000241208
ENSMUSG00000104436_Gm37423	3.58751	-0.946612	0.845228	1.17177	0.279038	0.440851
ENSMUSG00000104900_4930596I21Rik	4.15419	-0.0125512	0.523182	0.000569513	0.980961	1
ENSMUSG00000085361_Gm16305	0.652655	0.334754	2.88748	-0.00149341	1	NA
ENSMUSG00000102157_Gm37470	3.20253	0.958776	2.04251	0.0307581	0.860781	0.929281
ENSMUSG00000105936_Gm43544	0.804825	1.84839	1.99036	-0.189915	1	NA
ENSMUSG00000102451_Gm37655	1.49744	0.157752	1.92705	0.013627	0.90707	NA
ENSMUSG00000102243_Gm37718	13.36	0.714906	0.703422	0.958094	0.327668	0.493397
ENSMUSG00000033964_Zbtb41	296.864	-0.172599	0.195598	0.754357	0.3851	0.55159
ENSMUSG00000033952_Aspm	83.7645	0.192552	0.350502	0.287737	0.591674	0.738852
ENSMUSG00000104496_Gm5837	1.31277	-0.686145	1.23727	0.291949	0.588974	NA
ENSMUSG00000026365_Cfh	525.634	0.552431	0.343454	2.17515	0.140256	0.268586
ENSMUSG00000101795_Gm5835	21.6624	0.338107	0.251225	1.80268	0.179388	0.323021
ENSMUSG00000026361_Cdc73	983.637	-0.115297	0.10601	1.17349	0.278685	0.440491
ENSMUSG00000033849_B3galt2	95.8678	-1.82619	0.693921	6.3726	0.0115896	0.037192
ENSMUSG00000018196_Glrx2	620.241	0.352923	0.125028	7.90188	0.00493835	0.0182711
ENSMUSG00000018199_Trove2	84.146	0.130377	0.288787	0.196544	0.657525	0.790784
ENSMUSG00000018189_Uchl5	1203.07	0.108043	0.0537184	4.04167	0.0443899	0.110486
ENSMUSG00000100455_Gm29170	37.6899	-0.365906	0.243175	2.24865	0.133731	0.258962
ENSMUSG00000026360_Rgs2	22661.8	-0.401724	0.0614088	42.537	6.93579848602837e-11	1.78614582094807e-09
ENSMUSG00000051079_Rgs13	23.2222	-3.22848	0.557585	30.6093	3.15581430717997e-08	4.8435966709414e-07
ENSMUSG00000026358_Rgs1	14084.1	-0.223286	0.0797348	7.80503	0.00521011	0.0191444
ENSMUSG00000100441_Gm7266	1.30906	0.673981	1.14466	0.31997	0.571626	NA
ENSMUSG00000026357_Rgs18	739.044	0.318797	0.106656	8.86851	0.00290131	0.0116589
ENSMUSG00000035131_Brinp3	2.34476	-0.533707	2.0093	0.0736782	0.786055	0.882384
ENSMUSG00000056220_Pla2g4a	789.401	0.945049	0.216919	17.7706	2.49208040103978e-05	0.000191495
ENSMUSG00000097028_Ptgs2os	9.29014	-0.479639	0.493276	0.911437	0.339733	0.50619
ENSMUSG00000032487_Ptgs2	11434.5	0.987854	0.238072	15.8646	6.804130944822e-05	0.000461364
ENSMUSG00000101199_Gm9687	2.7558	4.4595	1.53772	6.99985	0.00815165	0.0278677
ENSMUSG00000097754_Ptgs2os2	54.4452	-0.280258	0.405773	0.424326	0.514786	0.674055
ENSMUSG00000099875_Gm15453	4.60959	0.332241	0.584234	0.311854	0.576544	0.726963
ENSMUSG00000006010_BC003331	598.268	0.422467	0.111852	14.1316	0.000170453	0.0010081
ENSMUSG00000006005_Tpr	3796.47	-0.174257	0.0518323	11.294	0.00077759	0.00381294
ENSMUSG00000006014_Prg4	8.65753	-1.61752	0.790432	3.85654	0.0495524	0.120517
ENSMUSG00000066842_Hmcn1	0.792393	0.360485	2.82828	0.0476737	0.827162	NA
ENSMUSG00000114212_	6.18802	-0.103307	1.21425	0.00706849	0.932997	0.972723
ENSMUSG00000100954_Gm10138	25.5407	-0.201717	0.249654	0.643892	0.422305	0.58877
ENSMUSG00000023150_Ivns1abp	11624.5	-0.885639	0.14955	33.8798	5.86228353892486e-09	1.0594354427947e-07
ENSMUSG00000052748_Swt1	560.093	0.00399736	0.0892947	0.00200185	0.964313	0.990672
ENSMUSG00000053286_Trmt1l	794.65	-0.000800455	0.11816	4.53127947821486e-05	0.994629	1
ENSMUSG00000106406_Mir7682	1.55064	-0.150022	1.05318	0.0182323	0.89259	NA
ENSMUSG00000103928_Gm37893	14.215	-1.09435	1.09543	0.442688	0.505828	0.666043
ENSMUSG00000026484_Rnf2	1620.85	-0.250364	0.0737385	11.5083	0.000692855	0.00345132
ENSMUSG00000103238_Gm36527	1.2836	-1.63954	1.32415	1.70927	0.19108	NA
ENSMUSG00000026483_Fam129a	5994.78	-0.102371	0.0780549	1.71546	0.190279	0.336397
ENSMUSG00000100594_2810414N06Rik	10.2751	2.63257	0.824966	6.96661	0.00830445	0.0282637
ENSMUSG00000043019_Edem3	501.797	0.00300367	0.156012	0.000361205	0.984837	1
ENSMUSG00000032666_1700025G04Rik	1496.15	0.0337715	0.0944602	0.126806	0.721767	0.837466
ENSMUSG00000014980_Tsen15	196.292	-0.310864	0.18549	2.73557	0.0981363	0.20421
ENSMUSG00000032649_Colgalt2	203.601	-1.77966	0.599767	8.27016	0.00403019	0.0153768
ENSMUSG00000026482_Rgl1	1991.79	0.956778	0.246668	13.7438	0.000209512	0.0012146
ENSMUSG00000080950_Gm7278	11.4291	-1.3856	0.411944	10.9401	0.000941058	0.00450035
ENSMUSG00000008475_Arpc5	24020.1	0.207689	0.0752063	7.58154	0.00589689	0.0211847
ENSMUSG00000026480_Ncf2	4060.33	0.400276	0.118351	11.3047	0.000773104	0.00379412
ENSMUSG00000042772_Smg7	1623.89	-0.377654	0.0750584	25.2071	5.1491509596433e-07	6.01783496539309e-06
ENSMUSG00000100394_Gm28791	10.1336	0.468133	0.693181	0.3629	0.5469	0.702045
ENSMUSG00000042751_Nmnat2	11.3893	-1.63293	0.61257	6.93542	0.00845052	0.0286601
ENSMUSG00000026479_Lamc2	4.25319	4.13923	1.58904	2.45406	0.117222	0.233898
ENSMUSG00000026478_Lamc1	191.43	-0.191573	0.356869	0.264577	0.606993	0.751647
ENSMUSG00000079138_Gm8818	91.7964	-1.28202	0.335735	14.295	0.000156275	0.000936215
ENSMUSG00000073538_E330020D12Rik	59.8209	0.299053	0.377892	0.546382	0.4598	0.624801
ENSMUSG00000042708_Shcbp1l	11.7677	0.685432	0.446161	2.30431	0.129015	0.251943
ENSMUSG00000042699_Dhx9	420.581	0.381109	0.151595	6.19727	0.0127947	0.0403888
ENSMUSG00000042684_Npl	170.845	0.273114	0.14899	3.31542	0.0686329	0.155445
ENSMUSG00000042671_Rgs8	1.00762	-1.51133	3.02372	0.109546	0.740661	NA
ENSMUSG00000026475_Rgs16	170.679	-1.22455	0.201311	35.9191	2.05678809563482e-09	4.0924033726381e-08
ENSMUSG00000066800_Rnasel	311.317	-0.126089	0.257832	0.22518	0.635121	0.773959
ENSMUSG00000042641_Rgsl1	5.01653	-0.130074	1.66424	-0.00671434	1	1
ENSMUSG00000045968_Teddm2	3.18336	1.23698	0.889498	1.86888	0.171603	0.312651
ENSMUSG00000026473_Glul	519.788	-0.00402368	0.0807146	0.00247788	0.960299	0.987702
ENSMUSG00000101903_Gm29291	0.885088	2.03508	1.89736	1.30381	0.253519	NA
ENSMUSG00000100627_A830008E24Rik	3.76302	-3.71799	1.23118	7.70135	0.00551795	0.020056
ENSMUSG00000004110_Cacna1e	122.801	-0.850377	0.441018	3.57823	0.0585414	0.136926
ENSMUSG00000101880_Gm29282	1.96043	0.519671	1.27729	0.094784	0.758181	0.863372
ENSMUSG00000096950_Gm9530	223.1	0.372361	0.413054	0.717497	0.396966	0.563902
ENSMUSG00000056708_Ier5	14626.5	0.339234	0.0538825	39.4551	3.35691497052147e-10	7.72837400739556e-09
ENSMUSG00000026471_Mr1	107.152	-0.089706	0.244806	0.132489	0.715865	0.833478
ENSMUSG00000026470_Stx6	2766.64	-0.389244	0.0668087	33.8352	5.9984329422857e-09	1.08211730278834e-07
ENSMUSG00000104181_Gm8850	3.84307	-0.640519	0.733628	0.714775	0.397863	0.564857
ENSMUSG00000033722_BC034090	2.86886	3.8819	1.96437	3.9186	0.0477545	0.117132
ENSMUSG00000026469_Xpr1	708.714	0.209653	0.185749	1.26191	0.26129	0.42136
ENSMUSG00000033701_Acbd6	622.161	-0.181657	0.128752	1.96163	0.161339	0.298319
ENSMUSG00000033684_Qsox1	625.029	-0.139164	0.196456	0.489672	0.484074	0.64689
ENSMUSG00000033671_Cep350	826.368	0.305715	0.107062	8.14221	0.00432465	0.0163267
ENSMUSG00000102837_Gm37383	0.776659	2.46573	2.67599	1.11562	0.290863	NA
ENSMUSG00000102833_Gm9694	2.13209	-0.0488677	1.09758	0.0016941	0.967169	0.992447
ENSMUSG00000026466_Tor1aip1	3354.97	0.383928	0.0741388	26.6167	2.48085314180021e-07	3.1190654689867e-06
ENSMUSG00000102964_9430034N14Rik	30.3279	0.238702	0.347199	0.442923	0.505715	0.665944
ENSMUSG00000050565_Tor1aip2	3682.07	0.0631299	0.0792403	0.633148	0.426203	0.592888
ENSMUSG00000060985_Tdrd5	7.34874	-1.75819	0.747845	5.62816	0.0176741	0.0528871
ENSMUSG00000026602_Nphs2	3.00867	-0.0509639	1.08718	-0.0042716	1	1
ENSMUSG00000078193_Gm2000	239.661	0.104825	0.159764	0.427412	0.513261	0.672459
ENSMUSG00000026600_Soat1	2958.34	0.444817	0.120211	13.4216	0.000248747	0.00141638
ENSMUSG00000103199_Gm37648	3.58194	3.49057	1.49862	2.13709	0.143774	0.273715
ENSMUSG00000101523_Gm10031	3.14959	0.600916	0.693829	0.725876	0.394223	0.561184
ENSMUSG00000026596_Abl2	196.185	-0.0166185	0.201674	0.0067367	0.934585	0.973494
ENSMUSG00000104293_Gm38043	4.38306	1.97427	0.991916	3.1014	0.078225	0.172095
ENSMUSG00000060519_Tor3a	2255.55	0.779857	0.249568	8.84055	0.0029461	0.0118146
ENSMUSG00000033557_Fam20b	787.202	0.329664	0.107957	9.22955	0.00238141	0.00983714
ENSMUSG00000046057_Gm15428	5.5953	0.553893	0.56158	0.967475	0.325311	0.490812
ENSMUSG00000026594_Ralgps2	303.532	-1.20682	0.220685	28.2456	1.06857703478573e-07	1.4592547721154e-06
ENSMUSG00000101964_Gm28693	0.652603	-0.521682	3.02595	0.0134284	0.907747	NA
ENSMUSG00000103303_Gm37802	1.69985	-3.77142	2.11462	3.38417	0.0658252	NA
ENSMUSG00000101905_4930439D14Rik	1.76561	-2.69746	1.30526	4.37177	0.0365391	NA
ENSMUSG00000070565_Rasal2	120.901	-0.322588	0.281876	1.24891	0.263761	0.423951
ENSMUSG00000103808_Gm37060	3.14184	-0.503784	2.18766	-0.323284	1	1
ENSMUSG00000049881_2810025M15Rik	172.023	0.00589737	0.111977	0.00276757	0.958044	0.987
ENSMUSG00000033488_BC026585	244.466	-0.354018	0.151479	5.37118	0.0204722	0.0594592
ENSMUSG00000026589_Sec16b	15.3086	1.7039	0.643882	6.16108	0.0130592	0.0410761
ENSMUSG00000073530_Pappa2	4.16052	-3.03842	1.32537	5.17356	0.0229331	0.0650808
ENSMUSG00000047661_1600012P17Rik	2.23099	0.0260059	1.36075	0.00346354	0.95307	0.984133
ENSMUSG00000040782_Rfwd2	764.682	0.182184	0.0708012	6.60923	0.0101451	0.0333912
ENSMUSG00000103572_Gm37115	2.18461	-2.38708	2.33802	0.191384	0.661767	0.793952
ENSMUSG00000015829_Tnr	10.5288	-0.080093	0.635818	0.0155277	0.900832	0.954111
ENSMUSG00000104111_Gm37294	1.96711	-0.990255	1.03692	0.921175	0.337167	0.503817
ENSMUSG00000090394_4930523C07Rik	3025.15	-0.858842	0.056472	228.255	1.43209734959637e-51	1.04954834508544e-48
ENSMUSG00000026729_4930562F07Rik	14.4961	-0.790549	0.344368	5.22278	0.0222929	0.0636748
ENSMUSG00000026725_Tnn	1.00019	0.343578	2.41847	0.0220142	0.882049	NA
ENSMUSG00000058267_Mrps14	1854.34	0.267817	0.0986228	7.35194	0.00669906	0.0236749
ENSMUSG00000014226_Cacybp	2900.19	0.301301	0.0536296	31.4687	2.02685926105706e-08	3.25277623565079e-07
ENSMUSG00000103006_4933417C20Rik	1.79157	-0.192025	1.74495	-0.143011	1	NA
ENSMUSG00000026721_Rabgap1l	2233.66	-0.338495	0.226182	2.10392	0.146922	0.278411
ENSMUSG00000104302_Gm36975	0.946918	-0.627962	1.6639	0.199383	0.655219	NA
ENSMUSG00000103522_9430087J23Rik	3.40598	-0.259739	1.07906	0.0368989	0.847671	0.920976
ENSMUSG00000103693_Gm37529	10.8565	0.114386	0.697689	0.023037	0.879361	0.941163
ENSMUSG00000118401_	9.57206	0.92896	1.15427	0.619413	0.431266	0.597945
ENSMUSG00000104020_Gm37215	1.76997	0.550809	0.983895	0.256286	0.612683	NA
ENSMUSG00000103432_6720464F23Rik	4.71983	0.368646	0.935807	0.104559	0.746426	0.85513
ENSMUSG00000102172_Gm37873	2.17149	-3.46642	1.87704	2.055	0.151707	0.284938
ENSMUSG00000103200_Gm37328	0.926661	-3.12714	3.00216	1.47725	0.224206	NA
ENSMUSG00000103632_Gm38329	16.6246	-0.597933	0.529787	1.22381	0.268615	0.429359
ENSMUSG00000104053_Gm38126	13.5435	-0.70896	0.702083	0.873753	0.349918	0.516508
ENSMUSG00000102852_Gm37083	2.19783	-1.79857	1.11134	2.13221	0.144233	0.274266
ENSMUSG00000040423_Rc3h1	477.729	-0.253334	0.0790079	10.2615	0.00135838	0.00615312
ENSMUSG00000103343_Gm37052	6.20633	-4.26074	0.93803	22.1385	2.53672123159961e-06	2.4779490282152e-05
ENSMUSG00000103846_Gm37809	1.32496	-0.165421	1.70468	0.00848025	0.926628	NA
ENSMUSG00000103739_Gm37653	7.65923	0.388978	0.979033	0.131002	0.717396	0.834652
ENSMUSG00000026715_Serpinc1	26.4945	-0.496791	0.243195	4.16758	0.0412046	0.104265
ENSMUSG00000103222_Gm37729	0.656143	0.576126	2.89356	0.0228983	0.879722	NA
ENSMUSG00000043467_Zbtb37	114.015	-0.203406	0.169673	1.42127	0.233194	0.38904
ENSMUSG00000104016_Gm37362	4.69249	-4.29283	1.80647	5.07796	0.0242319	0.0680637
ENSMUSG00000053332_Gas5	2071.57	-0.256492	0.120021	4.51945	0.0335115	0.0883048
ENSMUSG00000026709_Dars2	712.348	-0.625461	0.199331	9.33582	0.00224718	0.00936848
ENSMUSG00000026708_Cenpl	756.195	-0.305741	0.171921	3.05084	0.0806953	0.17636
ENSMUSG00000026705_Klhl20	372.447	0.403721	0.10159	15.7389	7.2713881294212e-05	0.00048741
ENSMUSG00000102817_Gm6185	5.07462	0.00504149	0.665587	5.66822422172208e-05	0.993993	1
ENSMUSG00000026701_Prdx6	10299.1	-0.574499	0.0714488	64.0419	1.21802905153076e-15	6.33843579508124e-14
ENSMUSG00000026700_Tnfsf4	315.771	-1.0521	0.239025	17.8059	2.44618901370346e-05	0.000188463
ENSMUSG00000066755_Tnfsf18	43.9328	0.434533	0.461752	0.864129	0.352586	0.519226
ENSMUSG00000040323_Gm15429	3.38681	0.446006	0.593706	0.555778	0.455966	0.621336
ENSMUSG00000102399_Gm5049	1.47933	-1.28949	2.99582	0.099923	0.751922	NA
ENSMUSG00000000817_Fasl	1492.07	-1.29235	0.245946	26.1409	3.17388498891732e-07	3.87486619952165e-06
ENSMUSG00000040297_Suco	1773.94	-0.701277	0.125876	30.3207	3.66200005558179e-08	5.5288342470067e-07
ENSMUSG00000102254_Gm7496	1.80071	0.128633	1.21949	0.0231116	0.879167	NA
ENSMUSG00000086277_4930558K02Rik	1.90254	-1.2751	1.27141	0.965917	0.325701	0.491063
ENSMUSG00000026698_Pigc	338.817	0.09649	0.121578	0.624135	0.429515	0.595941
ENSMUSG00000040265_Dnm3	14.7413	-1.25527	0.487883	6.811	0.00905979	0.0303529
ENSMUSG00000026694_Mettl13	424.326	-0.518158	0.123226	17.4176	3.00034999983683e-05	0.000225526
ENSMUSG00000026696_Vamp4	2253.86	-0.0549276	0.049129	1.24987	0.263577	0.423763
ENSMUSG00000040225_Prrc2c	1677.21	-0.241314	0.148374	2.61382	0.105936	0.215988
ENSMUSG00000098259_Gm27616	1.07977	-2.0144	1.5617	1.72404	0.189174	NA
ENSMUSG00000040181_Fmo1	2.8955	2.38686	2.30916	0.202347	0.652833	0.787402
ENSMUSG00000040170_Fmo2	1.4009	-2.3209	3.0108	0.472777	0.491712	NA
ENSMUSG00000026586_Prrx1	12.8733	1.62391	0.787399	2.79248	0.0947077	0.198808
ENSMUSG00000040124_Gorab	202.948	0.269745	0.167591	2.56054	0.109561	0.221474
ENSMUSG00000102117_Rpsa-ps1	1.2463	-0.0977219	0.99113	0.010498	0.918392	NA
ENSMUSG00000026585_Kifap3	196.141	-0.278512	0.165463	2.78432	0.0951913	0.199538
ENSMUSG00000026584_Scyl3	845.924	-0.106395	0.0985959	1.16204	0.281044	0.443224
ENSMUSG00000041406_BC055324	110.806	0.157716	0.217452	0.512646	0.473996	0.637882
ENSMUSG00000041396_Mettl18	80.0011	-0.452606	0.196911	5.16955	0.0229861	0.0651891
ENSMUSG00000026582_Sele	41.9172	1.87685	0.859149	2.87464	0.0899849	0.191616
ENSMUSG00000026581_Sell	4591.11	-0.735601	0.22143	10.282	0.00134338	0.00609457
ENSMUSG00000026580_Selp	10.6583	-0.675977	0.663797	0.833569	0.361242	0.528019
ENSMUSG00000090081_Gm16587	4.39409	1.58486	1.01057	1.68764	0.193913	0.341209
ENSMUSG00000086593_Gm16548	3.99591	-1.02076	0.936328	1.1249	0.288865	0.451912
ENSMUSG00000026579_F5	620.125	-1.64337	0.371438	18.5235	1.67825486134967e-05	0.000133509
ENSMUSG00000040918_Slc19a2	320.211	-0.483617	0.144342	11.0481	0.000887789	0.00426843
ENSMUSG00000026578_Ccdc181	195.245	0.137424	0.133127	1.05929	0.303377	0.467859
ENSMUSG00000026577_Blzf1	557.647	-0.0899511	0.058645	2.35146	0.125166	0.24623
ENSMUSG00000026575_Nme7	135.311	-0.116555	0.193466	0.359294	0.548899	0.703943
ENSMUSG00000026576_Atp1b1	501.363	-1.27362	0.286542	18.1605	2.03043941887175e-05	0.000159151
ENSMUSG00000104011_Gm32391	1.79644	-1.75546	1.44903	1.37429	0.241077	NA
ENSMUSG00000026574_Dpt	6.24138	-0.209839	1.2808	0.0206496	0.885738	0.945317
ENSMUSG00000104117_Gm20743	36.3052	0.282624	0.348578	0.673791	0.411733	0.578432
ENSMUSG00000026573_Xcl1	1291.26	-0.264639	0.253799	1.03076	0.30998	0.474892
ENSMUSG00000040848_Sft2d2	2624.88	0.215148	0.0912757	5.54229	0.0185623	0.0549633
ENSMUSG00000040843_Tiprl	1844.06	-0.489396	0.10197	22.6946	1.89898443405519e-06	1.926253587693e-05
ENSMUSG00000102302_Gm38190	16.0522	0.586206	0.979674	0.147531	0.700906	0.822176
ENSMUSG00000026571_Dcaf6	142.261	-0.0339756	0.243294	0.0190385	0.890256	0.947851
ENSMUSG00000102401_Gm37864	1.16988	-2.96779	3.00682	1.29077	0.255905	NA
ENSMUSG00000026568_Mpc2	2071.22	0.103529	0.0929461	1.23684	0.266082	0.426488
ENSMUSG00000103763_Gm37860	2.01024	-2.17068	1.47283	0.826637	0.363247	0.529956
ENSMUSG00000026566_Mpzl1	155.698	-1.24138	0.403526	7.45659	0.00632047	0.0224905
ENSMUSG00000040723_Rcsd1	3168.91	0.128064	0.128666	0.97621	0.323136	0.488573
ENSMUSG00000040713_Creg1	3929.38	0.182239	0.110695	2.6779	0.10175	0.209466
ENSMUSG00000089829_Gm16565	26.8441	-0.274602	0.269629	1.02549	0.31122	0.476501
ENSMUSG00000005763_Cd247	820.169	-0.955351	0.139724	45.8549	1.27344564779408e-11	3.79637889814407e-10
ENSMUSG00000102363_Gm32999	1.42066	0.117448	1.30704	0.0140927	0.905503	NA
ENSMUSG00000103768_Gm37856	4.07466	-1.06343	1.17612	0.530944	0.46621	0.631122
ENSMUSG00000102154_Gm37469	12.5623	-1.28614	0.526328	5.99954	0.0143096	0.0443824
ENSMUSG00000026565_Pou2f1	240.393	-0.42842	0.12392	11.88	0.000567401	0.00290609
ENSMUSG00000097196_Gm26665	0.688092	-1.19936	3.03342	0.0840655	0.771862	NA
ENSMUSG00000040612_Ildr2	5.71343	1.10135	0.551915	3.94564	0.0469931	0.115617
ENSMUSG00000103400_Gm15853	24.339	0.123817	0.237648	0.270151	0.60323	0.74878
ENSMUSG00000026563_Tada1	337.479	0.0203954	0.0858513	0.0563912	0.812294	0.899082
ENSMUSG00000040596_Pogk	391.697	-0.363155	0.122513	8.70657	0.00317065	0.012552
ENSMUSG00000097823_Gm16701	2.85087	1.34369	1.53316	0.941411	0.331915	0.498213
ENSMUSG00000060568_Fam78b	33.9304	-0.850095	0.654243	1.27733	0.258396	0.418117
ENSMUSG00000026558_Uck2	4241.9	0.326695	0.162416	3.91665	0.0478101	0.117212
ENSMUSG00000103139_Gm37982	0.82556	-1.36577	2.6373	0.314724	0.574796	NA
ENSMUSG00000102909_Gm2453	2.30863	0.557028	0.824642	0.412932	0.520485	0.679336
ENSMUSG00000052428_Tmco1	1685.95	0.228132	0.0762188	8.91068	0.00283508	0.0114372
ENSMUSG00000088246_Gm25911	0.667277	-1.01016	1.49003	0.496898	0.480866	NA
ENSMUSG00000026687_Aldh9a1	2671.13	0.0806089	0.118637	0.454363	0.50027	0.6613
ENSMUSG00000026688_Mgst3	119.412	0.663514	0.140538	22.1804	2.48194879048619e-06	2.43377755656554e-05
ENSMUSG00000015843_Rxrg	21.7751	-0.408558	0.426478	0.905557	0.341296	0.507959
ENSMUSG00000052534_Pbx1	311.425	0.477123	0.181564	6.83712	0.00892827	0.0299693
ENSMUSG00000103780_Gm37524	0.712496	1.65443	2.65643	0.475368	0.490528	NA
ENSMUSG00000026683_Nuf2	233.375	-0.0198235	0.22493	0.00744721	0.93123	0.971841
ENSMUSG00000026678_Rgs5	24.9459	0.709739	0.709874	0.879041	0.348464	0.515097
ENSMUSG00000038530_Rgs4	8.16705	-2.62311	1.53559	2.80049	0.0942356	0.198267
ENSMUSG00000026675_Hsd17b7	233.168	0.0601358	0.276689	0.0461352	0.82993	0.90951
ENSMUSG00000097503_3110045C21Rik	5.59248	-0.134116	0.833366	0.024331	0.876046	0.938815
ENSMUSG00000026674_Ddr2	11.5378	0.463339	0.806275	0.272501	0.601659	0.747689
ENSMUSG00000026670_Uap1	5240.29	-0.0230097	0.150699	0.0229688	0.879538	0.941296
ENSMUSG00000104266_Gm37748	5.73745	-2.4907	1.07666	3.82253	0.0505678	0.122512
ENSMUSG00000026667_Uhmk1	1351.67	0.16707	0.117884	1.97852	0.159546	0.295645
ENSMUSG00000044306_4930500M09Rik	5.57092	-0.682487	0.53616	1.6149	0.203804	0.353939
ENSMUSG00000073494_Sh2d1b2	1.33042	0.411565	2.00808	-1.3459	1	NA
ENSMUSG00000096964_Gm6345	4.72658	2.20215	1.37993	0.927008	0.335642	0.502349
ENSMUSG00000102418_Sh2d1b1	204.408	0.906109	0.218116	16.4699	4.94281013081659e-05	0.000349855
ENSMUSG00000102752_Gm7694	92.6585	1.33674	0.256957	25.9662	3.47447981012125e-07	4.20306914581999e-06
ENSMUSG00000038473_Nos1ap	68.1816	1.14652	0.201944	31.7261	1.77521612926246e-08	2.88312802378554e-07
ENSMUSG00000102193_Gm7299	6.624	0.326176	0.56378	0.324781	0.568749	0.720322
ENSMUSG00000038463_Olfml2b	15.0587	3.2387	1.34157	4.46939	0.0345074	0.0904951
ENSMUSG00000026663_Atf6	2511.13	0.307578	0.0770771	15.8535	6.84388918807142e-05	0.000463524
ENSMUSG00000053925_Gm9929	2.0879	-1.69021	1.38257	1.79755	0.180009	0.323706
ENSMUSG00000026659_Dusp12	129.671	-0.248963	0.130186	3.64942	0.0560889	0.13266
ENSMUSG00000096968_Gm26620	1.44611	-0.81912	1.3668	0.194033	0.659581	NA
ENSMUSG00000070524_Fcrlb	120.882	1.62123	0.439641	11.379	0.000742781	0.00366679
ENSMUSG00000038421_Fcrla	314.846	-0.114371	0.353799	0.0949542	0.757971	0.863245
ENSMUSG00000089838_Gm2962	2.81407	-1.47054	1.13598	1.34292	0.24652	0.404709
ENSMUSG00000026656_Fcgr2b	6118.17	1.37108	0.287582	19.7308	8.91537697241406e-06	7.59015322206152e-05
ENSMUSG00000103676_Gm38204	0.738043	-1.36465	1.95638	0.714113	0.398082	NA
ENSMUSG00000104340_Gm10522	7.75518	0.336007	0.517097	0.407403	0.523291	0.681739
ENSMUSG00000059089_Fcgr4	407.671	1.20584	0.26465	18.6636	1.55934978187029e-05	0.000125011
ENSMUSG00000059498_Fcgr3	2031.06	0.946072	0.126748	54.3786	1.65352925774402e-13	6.47748911235179e-12
ENSMUSG00000026649_Cfap126	61.696	0.25854	0.190177	1.83513	0.175523	0.317751
ENSMUSG00000058076_Sdhc	1968.12	0.302418	0.0960411	9.847	0.00170109	0.00744104
ENSMUSG00000056569_Mpz	10.0232	4.12535	1.16905	10.992	0.000915082	0.00438686
ENSMUSG00000038370_Pcp4l1	14.3013	0.692839	0.587866	1.3437	0.246382	0.404594
ENSMUSG00000005677_Nr1i3	0.700618	-1.41924	1.78223	0.877979	0.348756	NA
ENSMUSG00000005674_Tomm40l	118.403	-0.00696949	0.153171	0.00206748	0.963733	0.99025
ENSMUSG00000005681_Apoa2	3.25026	-0.68745	1.03237	0.417084	0.518396	0.677218
ENSMUSG00000058715_Fcer1g	15516.7	0.84484	0.112804	55.2576	1.05723052401755e-13	4.24557709747595e-12
ENSMUSG00000013593_Ndufs2	2528.96	0.305294	0.073689	17.0573	3.6268245349872e-05	0.000265248
ENSMUSG00000006403_Adamts4	2.90959	-0.600445	2.8455	0.0355384	0.850472	0.922719
ENSMUSG00000052423_B4galt3	473.993	0.259647	0.0628761	17.0415	3.65718426259197e-05	0.000267357
ENSMUSG00000062729_Ppox	923.651	-0.0831734	0.0664747	1.56132	0.211472	0.363099
ENSMUSG00000053483_Usp21	614.223	0.230283	0.0650891	12.4996	0.000407043	0.0021768
ENSMUSG00000062963_Ufc1	1181.08	0.425723	0.0977772	18.7864	1.46209802206867e-05	0.000117805
ENSMUSG00000079137_Rpl27-ps1	0.79004	0.801889	1.89489	0.119137	0.729973	NA
ENSMUSG00000103983_Gm20045	6.53906	-1.55224	0.850537	2.81697	0.0932725	0.19688
ENSMUSG00000013973_Dedd	52.0993	0.122784	0.221662	0.30455	0.581044	0.730573
ENSMUSG00000013997_Nit1	378.391	0.145717	0.109164	1.77357	0.182941	0.32764
ENSMUSG00000006412_Pfdn2	1085.37	-0.00393037	0.0642402	0.00374028	0.951234	0.982977
ENSMUSG00000102929_Gm37154	0.936253	1.08882	2.67512	0.149501	0.699013	NA
ENSMUSG00000045259_Klhdc9	4.34969	2.36209	0.769599	8.79986	0.00301254	0.0120454
ENSMUSG00000006411_Nectin4	104.308	2.8852	0.65713	11.8727	0.00056963	0.00291426
ENSMUSG00000048865_Arhgap30	5726.21	0.379312	0.0684264	30.5825	3.19965563447796e-08	4.90660357060444e-07
ENSMUSG00000026641_Usf1	1006.03	0.209997	0.0842869	6.18724	0.0128675	0.0405894
ENSMUSG00000103711_Tstd1	16.4167	-0.252319	0.345315	0.52673	0.467985	0.63294
ENSMUSG00000038235_F11r	1110.66	1.26384	0.0854987	212.516	3.88140366073089e-48	2.35413824098606e-45
ENSMUSG00000091993_B930036N10Rik	11.3069	-0.922189	0.410591	4.98789	0.0255254	0.0708372
ENSMUSG00000060244_Alyref2	67.3193	0.66926	0.183646	13.21	0.00027846	0.00156167
ENSMUSG00000004709_Cd244	1887.06	0.555014	0.111644	24.445	7.64622627891226e-07	8.61559731068467e-06
ENSMUSG00000004707_Ly9	1774.86	-0.212385	0.11355	3.47575	0.0622746	0.144068
ENSMUSG00000038179_Slamf7	5885.9	0.259945	0.163557	2.43812	0.118418	0.235724
ENSMUSG00000103219_Gm37787	14.2546	-0.00602619	0.288605	0.000436055	0.98334	1
ENSMUSG00000103083_A630035G10Rik	3.11005	-3.31104	1.76271	3.62459	0.0569316	0.134196
ENSMUSG00000103137_Gm37981	0.939927	-1.18128	3.01851	0.118547	0.730615	NA
ENSMUSG00000015355_Cd48	5135.67	0.478673	0.0951013	25.0072	5.71157045665148e-07	6.60926399750283e-06
ENSMUSG00000103883_Gm37010	2.63483	0.681947	0.995168	0.333483	0.563615	0.716133
ENSMUSG00000059058_Tma7-ps	2.90326	-0.257614	0.639995	0.15637	0.692521	0.816337
ENSMUSG00000015316_Slamf1	472.573	0.726337	0.374475	3.03296	0.0815889	0.177894
ENSMUSG00000038147_Cd84	1191.14	-0.269332	0.170023	2.43435	0.118703	0.236105
ENSMUSG00000073492_Gm10521	0.937925	1.39327	3.01904	0.176875	0.674072	NA
ENSMUSG00000104413_Gm37065	10.1849	0.933695	0.572985	2.32844	0.127029	0.249016
ENSMUSG00000015314_Slamf6	609.802	0.63279	0.271389	4.91418	0.0266371	0.0733552
ENSMUSG00000026556_Vangl2	94.3616	-0.900063	0.159448	31.7828	1.72414473941407e-08	2.80536372077282e-07
ENSMUSG00000003458_Ncstn	4027.83	0.177521	0.0880611	4.03033	0.0446893	0.110984
ENSMUSG00000026553_Copa	8314.93	-0.146442	0.0738006	3.92115	0.0476821	0.11698
ENSMUSG00000103380_Gm37756	1.00522	0.890496	1.18318	0.648343	0.420706	NA
ENSMUSG00000003464_Pex19	1130.16	0.113234	0.111838	1.0213	0.312211	0.477587
ENSMUSG00000026554_Dcaf8	2316.21	-0.282334	0.0585851	23.1787	1.47622807107311e-06	1.53914496396591e-05
ENSMUSG00000013698_Pea15a	2944.98	0.0512894	0.0999228	0.261696	0.608958	0.753338
ENSMUSG00000038034_Igsf8	2297.96	0.10695	0.0708293	2.27776	0.131241	0.255241
ENSMUSG00000007097_Atp1a2	2.38586	-2.83424	1.8611	1.46988	0.225364	0.379469
ENSMUSG00000038026_Kcnj9	2.20638	-2.89314	2.6211	1.09895	0.294497	0.4584
ENSMUSG00000044708_Kcnj10	5.15798	1.53701	0.96481	2.24477	0.134066	0.259359
ENSMUSG00000050229_Pigm	662.771	-0.04395	0.0641529	0.468825	0.493528	0.656086
ENSMUSG00000102278_Gm37145	6.40196	-0.133554	0.835007	0.0228863	0.879753	0.941421
ENSMUSG00000103357_Gm7804	1.8036	2.12286	1.84526	1.18319	0.276707	NA
ENSMUSG00000026548_Slamf9	499.925	1.19018	0.308044	13.0726	0.00029964	0.00165943
ENSMUSG00000037995_Igsf9	293.291	-0.767197	0.276336	7.53823	0.00604033	0.0216338
ENSMUSG00000026547_Tagln2	19066.7	-0.225345	0.105005	4.54302	0.0330532	0.0873062
ENSMUSG00000104351_Gm37125	13.1063	-0.475392	0.782437	0.354742	0.551441	0.706071
ENSMUSG00000026546_Cfap45	91.8238	-0.0840958	0.432171	0.0323482	0.857266	0.926963
ENSMUSG00000085184_4933439K11Rik	8.57703	0.300352	0.417502	0.507817	0.476085	0.639812
ENSMUSG00000049598_Vsig8	2.86842	0.491152	1.38439	0.118804	0.730336	0.843791
ENSMUSG00000053318_Slamf8	3358.51	0.925218	0.289294	8.94692	0.00277938	0.0112527
ENSMUSG00000070504_Fcrl6	10.6059	-0.710008	0.581713	1.4695	0.225424	0.379524
ENSMUSG00000026544_Dusp23	87.1763	0.43297	0.200823	4.61962	0.0316083	0.0841362
ENSMUSG00000005339_Fcer1a	206.541	-1.19278	0.522344	4.57171	0.0325042	0.0861667
ENSMUSG00000037872_Ackr1	8.78904	-0.470814	0.872064	0.242136	0.622668	0.763479
ENSMUSG00000005338_Cadm3	31.0811	0.527513	0.373852	1.92596	0.165201	0.303565
ENSMUSG00000037860_Aim2	858.176	0.204985	0.139532	2.12887	0.144547	0.27474
ENSMUSG00000037849_Ifi206	828.928	1.22736	0.215532	30.7877	2.87862537707786e-08	4.45705473216747e-07
ENSMUSG00000070501_Ifi214	85.864	0.704406	0.379301	2.99295	0.0836276	0.181394
ENSMUSG00000073491_Ifi213	1399.46	1.39673	0.276172	22.3261	2.30062189717954e-06	2.28490336247831e-05
ENSMUSG00000043263_Ifi209	4933.74	0.92006	0.189677	22.0858	2.60727364913193e-06	2.54350173125798e-05
ENSMUSG00000066677_Ifi208	75.325	-0.740183	0.649274	1.16694	0.280032	0.442024
ENSMUSG00000073490_Ifi207	4051.56	0.837621	0.188915	18.5372	1.6662240829373e-05	0.000132732
ENSMUSG00000073489_Ifi204	3142.23	1.40925	0.296366	19.2367	1.15474502938369e-05	9.56252840010815e-05
ENSMUSG00000090222_Ifi203-ps	36.2009	2.50508	0.93878	2.75403	0.0970095	0.202456
ENSMUSG00000090272_Mndal	2725.09	0.247796	0.118125	4.32718	0.0375082	0.0968629
ENSMUSG00000026536_Ifi211	1736.97	0.804041	0.288132	6.97149	0.00828184	0.0282086
ENSMUSG00000039997_Ifi203	1645.65	0.316535	0.114957	7.47137	0.00626877	0.0223382
ENSMUSG00000026535_Ifi202b	5.4089	-2.70624	1.83815	1.73713	0.187503	0.33324
ENSMUSG00000103588_Gm18445	4.51139	-0.332159	1.0628	0.0821597	0.774392	0.873846
ENSMUSG00000054203_Ifi205	8712.8	0.824228	0.260734	9.10558	0.00254831	0.0104529
ENSMUSG00000045381_Olfr433	79.5497	0.975826	0.58083	2.23766	0.134685	0.260213
ENSMUSG00000047048_Olfr432	2.34739	-2.17375	1.62441	1.86187	0.172409	0.313663
ENSMUSG00000028354_Fmn2	2.87072	-3.04694	2.99636	0.964032	0.326173	0.49149
ENSMUSG00000026526_Fh1	2171.16	0.836031	0.148109	30.6984	3.01406538005746e-08	4.65446847847504e-07
ENSMUSG00000039783_Kmo	2218.24	1.87284	0.348519	22.8826	1.72204302672115e-06	1.77128741502914e-05
ENSMUSG00000026525_Opn3	65.731	0.696208	0.277732	6.15245	0.013123	0.0412327
ENSMUSG00000078185_Chml	97.5284	1.44772	0.356684	14.1816	0.00016599	0.000986017
ENSMUSG00000039748_Exo1	86.1449	-0.205822	0.278886	0.527678	0.467585	0.632619
ENSMUSG00000078184_Rbm8a2	4.38857	0.205595	0.607067	0.111892	0.738	0.848577
ENSMUSG00000057335_Cep170	1549.1	0.134844	0.101783	1.73771	0.187429	0.333189
ENSMUSG00000104154_Gm38104	4.05313	2.22341	1.01046	2.94235	0.0862849	0.18562
ENSMUSG00000026504_Sdccag8	1239.62	0.43543	0.112294	14.8663	0.000115405	0.000725138
ENSMUSG00000103367_Gm38158	245.67	-0.220474	0.0863512	6.51312	0.0107081	0.0349046
ENSMUSG00000102211_Gm37490	6.95327	1.28292	0.545319	5.43499	0.0197372	0.0576937
ENSMUSG00000103251_Gm37519	2.61888	1.13699	1.0303	0.764571	0.381902	0.548617
ENSMUSG00000019699_Akt3	222.152	0.0693373	0.12358	0.313665	0.57544	0.726213
ENSMUSG00000104391_Gm37960	1.91086	-1.30038	1.29387	1.03847	0.308177	0.472913
ENSMUSG00000102749_Gm37598	2.30885	-1.24249	1.11025	1.10951	0.292188	0.455813
ENSMUSG00000103646_Gm37706	2.20558	-4.48197	1.12279	16.1922	5.72292904404724e-05	0.000396146
ENSMUSG00000097892_Gm26801	3.41963	2.71654	1.62374	2.25591	0.133105	0.258075
ENSMUSG00000063659_Zbtb18	461.272	0.260043	0.106202	5.9503	0.0147148	0.045367
ENSMUSG00000103767_Gm37858	1.53651	-1.20109	2.96325	0.0945348	0.758489	NA
ENSMUSG00000101746_2310043L19Rik	5.36422	1.01292	0.683059	2.07139	0.150085	0.28276
ENSMUSG00000015961_Adss	1824.06	-0.21812	0.0830514	6.88068	0.00871323	0.0293539
ENSMUSG00000091476_Gm16432	7.70694	-0.608245	0.657079	0.710107	0.399408	0.566502
ENSMUSG00000026502_Desi2	612.495	0.331505	0.0741361	19.95	7.94919926534936e-06	6.86057241797006e-05
ENSMUSG00000104126_Gm37486	11.9959	0.151325	0.375593	0.158168	0.690849	0.815089
ENSMUSG00000086350_B230369F24Rik	5.4946	-0.79129	0.960084	0.430048	0.511965	0.67121
ENSMUSG00000026500_Cox20	15.4397	-0.533471	0.321965	2.72927	0.0985245	0.20484
ENSMUSG00000039630_Hnrnpu	15864.5	-0.13793	0.0650768	4.48698	0.034154	0.0897555
ENSMUSG00000026495_Efcab2	76.5574	-0.219774	0.220528	0.980974	0.321958	0.487509
ENSMUSG00000026494_Kif26b	2.44778	2.15363	2.11251	0.286442	0.592509	0.739491
ENSMUSG00000055067_Smyd3	469.125	-0.654313	0.0998791	42.4935	7.09177318312236e-11	1.82273779071909e-09
ENSMUSG00000026492_Tfb2m	142.87	-0.534607	0.146316	13.2571	0.000271552	0.0015294
ENSMUSG00000038949_Cnst	548.358	-0.180118	0.306338	0.303258	0.581847	0.731426
ENSMUSG00000038936_Sccpdh	173.402	0.0602572	0.203748	0.0869911	0.768038	0.870202
ENSMUSG00000026491_Ahctf1	905.047	-0.449288	0.116342	14.6666	0.0001283	0.000793481
ENSMUSG00000026490_Cdc42bpa	29.7252	-1.10587	0.785612	1.35882	0.243741	0.401757
ENSMUSG00000026489_Coq8a	1458.54	-1.43729	0.210027	42.9013	5.75725357987984e-11	1.50500027218373e-09
ENSMUSG00000104520_Gm37336	1.8164	0.748376	2.82334	-0.0958701	1	NA
ENSMUSG00000010609_Psen2	1175.01	-0.200227	0.111311	3.19797	0.0737298	0.164145
ENSMUSG00000102923_Gm31728	2.78434	-1.28617	1.07567	1.02139	0.31219	0.477587
ENSMUSG00000055676_Gm5069	4.54215	1.77102	0.717076	5.76391	0.0163586	0.049532
ENSMUSG00000038855_Itpkb	784.82	-0.774715	0.106305	52.2968	4.77150466059637e-13	1.75577396391694e-11
ENSMUSG00000104388_Gm37033	81.2215	-0.596477	0.27866	4.49463	0.0340015	0.0894485
ENSMUSG00000103123_Gm37390	16.2209	0.178551	0.300478	0.348699	0.554851	0.708786
ENSMUSG00000103772_Gm36933	16.7502	-1.65914	0.507492	10.0927	0.00148861	0.00665223
ENSMUSG00000053963_Stum	2.44789	0.556929	1.31276	0.00087378	0.976418	0.998211
ENSMUSG00000102608_Gm37267	7.29937	-0.84302	0.543477	2.32558	0.127263	0.249307
ENSMUSG00000026496_Parp1	2267.21	-0.171414	0.119788	2.04219	0.152989	0.286649
ENSMUSG00000058729_Lin9	191.676	-0.0224677	0.142384	0.0248491	0.874744	0.938163
ENSMUSG00000026499_Acbd3	1386.3	-0.103707	0.0794939	1.69733	0.192637	0.339543
ENSMUSG00000103649_Gm37768	9.76319	-0.167283	0.643225	0.0525564	0.818673	0.901861
ENSMUSG00000060743_H3f3a	7461.01	0.295917	0.0965401	9.31706	0.0022703	0.00944696
ENSMUSG00000073485_H3f3aos	2.76423	-2.4715	1.186	4.10175	0.0428388	0.10735
ENSMUSG00000038806_Sde2	3093.59	-0.0925379	0.0927558	0.988086	0.320211	0.485742
ENSMUSG00000103979_Gm20305	0.718561	1.70802	1.879	1.10448	0.293285	NA
ENSMUSG00000066652_Lefty2	2.04104	2.00624	2.15922	-0.328375	1	1
ENSMUSG00000026520_Pycr2	914.829	0.221394	0.0768238	8.29451	0.00397652	0.015205
ENSMUSG00000038793_Lefty1	41.5243	0.935453	0.292318	9.96116	0.00159877	0.00707061
ENSMUSG00000026519_Tmem63a	525.305	0.224744	0.133487	2.79077	0.0948088	0.198973
ENSMUSG00000038776_Ephx1	342.983	-0.685494	0.143947	22.146	2.52687701779241e-06	2.47192657763908e-05
ENSMUSG00000026516_Nvl	663.858	-0.171421	0.132895	1.64986	0.198977	0.347839
ENSMUSG00000062169_Cnih4	1131.48	0.54026	0.160161	11.0608	0.000881702	0.00424459
ENSMUSG00000038733_Wdr26	1774.22	0.216883	0.121398	3.17818	0.0746278	0.165631
ENSMUSG00000081214_Rpl35a-ps2	37.6231	0.577716	0.320964	3.13907	0.0764373	0.168965
ENSMUSG00000103260_Gm8146	0.770353	-0.642038	1.85425	0.189831	0.663058	NA
ENSMUSG00000047369_Dnah14	3.36337	0.25581	1.0692	-0.571812	1	1
ENSMUSG00000004880_Lbr	3903.71	-0.524374	0.0921233	32.1701	1.41246009870574e-08	2.35040309140353e-07
ENSMUSG00000056699_Gm5533	0.790808	-2.22436	3.02749	0.638702	0.424181	NA
ENSMUSG00000022995_Enah	23.6986	-0.0361329	0.303151	0.0140729	0.905569	0.95687
ENSMUSG00000026511_Srp9	1305.18	0.136194	0.0552113	6.07806	0.0136871	0.0427075
ENSMUSG00000038633_Degs1	4079.76	0.10482	0.0840705	1.54405	0.214016	0.366358
ENSMUSG00000047539_Fbxo28	1270.79	0.0651493	0.123504	0.274791	0.600136	0.746467
ENSMUSG00000073482_Gm10517	2.67037	1.75802	1.42492	0.527307	0.467741	0.632757
ENSMUSG00000026510_Trp53bp2	576.092	0.531616	0.197381	7.15618	0.00747063	0.0259122
ENSMUSG00000026509_Capn2	2549.72	0.180958	0.0875959	4.26356	0.0389382	0.0997646
ENSMUSG00000102234_Gm37885	0.901575	-1.72492	2.34421	-0.640673	1	NA
ENSMUSG00000038576_Susd4	4.27147	1.15065	1.40829	-0.679912	1	1
ENSMUSG00000079164_Tlr5	170.97	0.457992	0.344582	1.52106	0.217459	0.370019
ENSMUSG00000104367_Gm38079	8.39973	0.227496	0.665539	0.0966662	0.755868	0.861184
ENSMUSG00000030768_Disp1	197.773	0.150209	0.272568	0.28122	0.595903	0.74262
ENSMUSG00000102478_BC085271	4.13687	-0.455689	0.639766	0.496938	0.480849	0.644392
ENSMUSG00000046836_Brox	1247.14	0.0362603	0.119323	0.0913627	0.762452	0.866343
ENSMUSG00000042901_Aida	324.82	0.258431	0.141145	3.32725	0.0681407	0.154708
ENSMUSG00000056050_Mia3	2488.93	-0.210538	0.11277	3.43492	0.0638317	0.146993
ENSMUSG00000103415_Gm37339	0.725926	1.76314	2.34606	0.81008	0.368097	NA
ENSMUSG00000072258_Taf1a	278.052	-0.84603	0.132358	40.2598	2.22339966114704e-10	5.28478062701558e-09
ENSMUSG00000103451_Gm33973	10.7086	0.245894	0.331716	0.547277	0.459433	0.624531
ENSMUSG00000039384_Dusp10	1481.85	-0.775245	0.0585622	173.896	1.04280441053761e-39	4.47363092120635e-37
ENSMUSG00000044854_1700056E22Rik	56.3418	-0.103659	0.175499	0.347859	0.555328	0.708955
ENSMUSG00000102682_Gm37223	2.52092	-0.396832	0.791577	0.218652	0.640069	0.777523
ENSMUSG00000102794_Gm37712	15.1442	0.752576	0.876733	0.517888	0.471744	0.636343
ENSMUSG00000103308_Gm37800	10.382	0.881098	0.637125	1.60662	0.204968	0.355424
ENSMUSG00000102606_Rpl21-ps1	1.10369	2.01229	2.38972	0.795475	0.37245	NA
ENSMUSG00000039377_Hlx	1003.44	0.530318	0.219573	5.4383	0.0196998	0.0576348
ENSMUSG00000102158_Gm34342	7.35482	1.1821	0.60965	3.5664	0.0589601	0.137704
ENSMUSG00000026621_Marc1	3.73595	-0.337154	0.900068	0.111997	0.737882	0.848553
ENSMUSG00000073481_Marc2	1566.45	0.0567931	0.0379531	2.23836	0.134624	0.260123
ENSMUSG00000039349_C130074G19Rik	5.2257	-2.32929	1.03171	3.46855	0.0625459	0.144581
ENSMUSG00000026620_Mark1	8.54299	1.65359	1.29329	0.515564	0.47274	0.63702
ENSMUSG00000039318_Rab3gap2	883.628	-0.0802407	0.115845	0.476734	0.489905	0.652354
ENSMUSG00000026618_Iars2	1417.98	-0.576834	0.144264	15.564	7.97604487674662e-05	0.00052721
ENSMUSG00000065581_Mir194-1	0.890963	0.694736	3.00259	0.0520113	0.8196	NA
ENSMUSG00000102526_Gm37785	6.79018	-2.7477	1.52513	0.928412	0.335276	0.5021
ENSMUSG00000026617_Bpnt1	4018.99	-0.931101	0.199115	20.442	6.14650665236338e-06	5.45188630904788e-05
ENSMUSG00000097261_4930532G15Rik	29.4353	-0.312381	0.755605	0.100635	0.751068	0.858385
ENSMUSG00000026615_Eprs	13955.8	-1.25785	0.156576	60.8655	6.11118597819846e-15	2.92887330164939e-13
ENSMUSG00000051295_9630028B13Rik	0.887296	-1.80705	2.52755	0.64978	0.420191	NA
ENSMUSG00000026614_Slc30a10	1.21708	1.7779	2.21117	0.885968	0.346572	NA
ENSMUSG00000039246_Lyplal1	9.06743	1.54808	0.619843	5.56849	0.0182866	0.0543407
ENSMUSG00000039239_Tgfb2	9.5186	-0.059624	1.00504	0.00307259	0.955795	0.985664
ENSMUSG00000001305_Rrp15	543.221	-0.217402	0.0742446	8.56033	0.00343566	0.0133902
ENSMUSG00000097784_A430105J06Rik	3.49279	-0.0791553	0.824905	0.00776816	0.929768	0.970906
ENSMUSG00000097935_Gm3809	1.16343	0.634196	0.976304	0.410705	0.521612	NA
ENSMUSG00000039210_Gpatch2	397.929	-0.388325	0.100894	14.7552	0.00012241	0.00076215
ENSMUSG00000104394_Gm37254	34.1545	-0.179043	0.349344	0.252173	0.615549	0.758717
ENSMUSG00000104245_Gm38155	1.7122	4.23519	2.98725	2.27105	0.13181	NA
ENSMUSG00000026608_Kctd3	222.904	0.130555	0.109534	1.41584	0.23409	0.390238
ENSMUSG00000102824_Pdcd5-ps	2.25366	-0.0482709	0.823516	0.00312071	0.955451	0.98554
ENSMUSG00000026605_Cenpf	122.834	-0.459037	0.227677	4.04796	0.0442249	0.110196
ENSMUSG00000026604_Ptpn14	6.25448	-0.872839	1.17737	-0.443484	1	1
ENSMUSG00000104435_Gm37422	45.9402	0.0599178	0.2633	0.0498114	0.823392	0.904814
ENSMUSG00000026603_Smyd2	369.31	-0.563335	0.169276	10.7537	0.00104069	0.00489563
ENSMUSG00000010175_Prox1	8.15623	0.927302	1.42341	0.0736719	0.786064	0.882384
ENSMUSG00000089872_Rps6kc1	667.469	0.222487	0.158801	1.91314	0.166615	0.305588
ENSMUSG00000026634_Angel2	1360.66	0.0203954	0.0719775	0.0802583	0.776948	0.875728
ENSMUSG00000037568_Vash2	11.8185	-1.91313	1.13207	1.79696	0.18008	0.323769
ENSMUSG00000066595_Mfsd7b	1622.86	0.026999	0.104088	0.0670359	0.795702	0.888112
ENSMUSG00000097845_A230020J21Rik	1.46148	-0.846562	1.34364	0.369327	0.543372	NA
ENSMUSG00000057072_Spata45	0.82282	-0.819588	2.30859	0.109806	0.740365	NA
ENSMUSG00000026632_Tatdn3	222.613	0.234478	0.176092	1.72357	0.189234	0.335285
ENSMUSG00000062510_Nsl1	156.074	-0.0187561	0.242772	0.00564899	0.940088	0.976515
ENSMUSG00000026630_Batf3	1115.16	0.501925	0.0836045	35.7825	2.20625978851527e-09	4.36021386743765e-08
ENSMUSG00000102777_Gm38161	1.12464	0.677438	1.90316	-0.693282	1	NA
ENSMUSG00000091017_Fam71a	11.7824	-0.563322	0.622727	0.816568	0.366185	0.533105
ENSMUSG00000026628_Atf3	17130.5	0.368916	0.163927	4.88233	0.027133	0.0743719
ENSMUSG00000073478_D730003I15Rik	71.2599	-0.0902919	0.173991	0.266224	0.605876	0.750687
ENSMUSG00000103685_Gm37074	2.67071	2.25766	1.35163	2.4922	0.114412	0.229411
ENSMUSG00000103174_Gm37168	18.9819	-0.822249	0.564086	1.63952	0.200392	0.349776
ENSMUSG00000037499_Nenf	262.031	0.412766	0.178918	5.15655	0.0231589	0.065605
ENSMUSG00000026627_Tmem206	866.419	0.658135	0.184909	12.0744	0.000511186	0.00265307
ENSMUSG00000026626_Ppp2r5a	5427.38	-0.206329	0.0623355	10.9172	0.000952771	0.00455141
ENSMUSG00000103114_Gm32200	0.916805	0.995201	3.01112	0.097085	0.755356	NA
ENSMUSG00000102246_9430037O13Rik	0.76291	-2.61076	2.10947	2.0466	0.152546	NA
ENSMUSG00000037474_Dtl	436.456	-0.548662	0.230563	5.47547	0.0192852	0.056629
ENSMUSG00000037461_Ints7	906.871	-0.351192	0.0635276	30.4603	3.40765236467265e-08	5.19836924910905e-07
ENSMUSG00000102970_Gm37349	0.992681	2.42705	2.00632	1.76669	0.183792	NA
ENSMUSG00000026623_Lpgat1	1403.58	0.353636	0.116276	9.15888	0.00247514	0.0101885
ENSMUSG00000102840_Gm38037	4.28368	-0.516252	1.10688	0.272011	0.601986	0.747975
ENSMUSG00000026622_Nek2	235.852	-0.312951	0.433733	0.459211	0.497993	0.659771
ENSMUSG00000055833_1700034H15Rik	2.82448	2.00924	1.33155	1.09731	0.294858	0.45892
ENSMUSG00000037434_Slc30a1	1419.9	0.471026	0.208069	4.86333	0.0274334	0.0750313
ENSMUSG00000049353_Rd3	19.0381	-1.14887	0.600419	3.69099	0.0547072	0.130257
ENSMUSG00000097416_Gm26670	2.57951	-1.13914	1.01499	1.1033	0.293544	0.45728
ENSMUSG00000026637_Traf5	544.3	0.513659	0.109083	21.9105	2.8566477055674e-06	2.75771550456778e-05
ENSMUSG00000103653_Gstp-ps	46.4841	0.561109	0.177935	9.91197	0.00164207	0.00723868
ENSMUSG00000037395_Rcor3	148.038	0.200459	0.213911	0.869977	0.350962	0.517527
ENSMUSG00000097316_Gm10516	6.38809	-3.76872	1.33862	3.31278	0.0687433	0.155603
ENSMUSG00000037375_Hhat	59.7139	0.220332	0.194373	1.27449	0.258927	0.41877
ENSMUSG00000016262_Sertad4	2.654	-0.377056	2.4408	-0.00299269	1	1
ENSMUSG00000016181_Diexf	82.5639	-0.204875	0.293113	0.467384	0.494193	0.656622
ENSMUSG00000026638_Irf6	113.344	-0.69077	0.154653	19.7769	8.7029542763575e-06	7.43344929914188e-05
ENSMUSG00000079144_A130010J15Rik	170.087	-0.357199	0.117504	9.18482	0.00244031	0.0100521
ENSMUSG00000037318_Traf3ip3	934.991	-0.0599539	0.0924736	0.41952	0.517177	0.676178
ENSMUSG00000090080_Gm15872	0.716642	2.5446	3.01821	0.897458	0.343464	NA
ENSMUSG00000089683_4930570N18Rik	27.2578	-1.40302	0.276093	25.6076	4.18388855945261e-07	4.9858005333477e-06
ENSMUSG00000026639_Lamb3	102.041	-1.00801	0.335185	8.27838	0.00401198	0.0153173
ENSMUSG00000016194_Hsd11b1	1001.48	-1.37159	0.26698	24.0715	9.28225863518463e-07	1.02232715801041e-05
ENSMUSG00000103089_Gm38118	4.69734	-1.37151	1.59508	0.73044	0.392741	0.559481
ENSMUSG00000009633_G0s2	220.336	-1.63077	0.357808	19.8548	8.3553910871485e-06	7.18645348811027e-05
ENSMUSG00000104348_Gm37691	2.14597	-3.30344	1.24872	7.28641	0.00694782	0.0243679
ENSMUSG00000026640_Plxna2	9.93278	-2.04858	0.696213	8.54228	0.00346991	0.0134997
ENSMUSG00000016494_Cd34	60.2258	-1.57172	0.273393	31.2903	2.22184712934462e-08	3.53986133677921e-07
ENSMUSG00000097325_Gm16897	2.68997	-1.30659	1.56738	0.799471	0.371252	0.538241
ENSMUSG00000096929_A330023F24Rik	1.07112	0.181486	1.26211	0.025177	0.873927	NA
ENSMUSG00000104525_Gm37334	1.40347	-0.323025	1.67141	0.0606444	0.80548	NA
ENSMUSG00000103867_9630010A21Rik	7.1157	-3.73721	1.21088	6.68679	0.00971299	0.0321979
ENSMUSG00000016493_Cd46	11.2918	-1.99921	0.419504	23.0759	1.55731834845592e-06	1.6141233017673e-05
ENSMUSG00000104010_Gm37366	1.01019	0.0208764	2.47323	0.00317234	0.955084	NA
ENSMUSG00000016481_Cr1l	1774.64	0.0185413	0.0516592	0.128748	0.719734	0.836045
ENSMUSG00000026616_Cr2	30.7364	1.53173	0.786153	1.87952	0.170389	0.310889
ENSMUSG00000050530_Fam171a1	29.2026	-0.613742	0.347133	2.96767	0.0849444	0.183436
ENSMUSG00000026643_Nmt2	364.925	-0.0121419	0.0989618	0.0150298	0.902427	0.955142
ENSMUSG00000049950_Rpp38	193.58	-0.333669	0.162944	4.13387	0.042033	0.10592
ENSMUSG00000026644_Acbd7	18.508	-0.32889	0.509337	0.456562	0.499235	0.660627
ENSMUSG00000026650_Meig1	4.98895	0.957635	0.739392	1.48735	0.222628	0.376121
ENSMUSG00000026648_Dclre1c	1060.4	0.406958	0.234074	2.86096	0.0907535	0.192879
ENSMUSG00000026646_Suv39h2	185.497	0.118655	0.191531	0.378068	0.538639	0.695175
ENSMUSG00000085043_Gm13184	1.28039	0.296837	1.18125	0.0524106	0.818921	NA
ENSMUSG00000109865_Hspa14	2270.28	-0.0781307	0.0625372	1.55834	0.211908	0.363739
ENSMUSG00000051396_Gm45902	258.753	-0.163405	0.180198	0.820531	0.365025	0.531976
ENSMUSG00000039496_Cdnf	1.90432	-1.65021	1.56013	0.720501	0.39598	0.562728
ENSMUSG00000026655_Fam107b	10342.4	-0.809063	0.120621	43.765	3.70273188475272e-11	1.00505171482895e-09
ENSMUSG00000081070_Gm13181	0.680859	0.296482	1.59176	0.0327896	0.856306	NA
ENSMUSG00000085205_Gm13185	0.867694	-0.600217	1.56921	0.281799	0.595525	NA
ENSMUSG00000026657_Frmd4a	977.503	0.763032	0.136869	30.3255	3.65288433893971e-08	5.51980950494936e-07
ENSMUSG00000039449_Prpf18	1708.07	0.0880043	0.109473	0.641403	0.423203	0.589742
ENSMUSG00000026662_Sephs1	1014.04	0.226965	0.0613671	13.6522	0.000219979	0.00126942
ENSMUSG00000026664_Phyh	1709.89	0.524641	0.0658769	62.969	2.09980746784705e-15	1.06744258820699e-13
ENSMUSG00000086670_Gm13194	0.680416	1.73119	2.3049	-0.26588	1	NA
ENSMUSG00000026669_Mcm10	219.765	-0.44625	0.140218	10.0436	0.00152879	0.00681257
ENSMUSG00000026672_Optn	152.325	-0.663495	0.195164	11.2689	0.000788148	0.00385719
ENSMUSG00000026676_Ccdc3	10.9594	0.710865	1.37908	0.238412	0.625356	0.765792
ENSMUSG00000080820_Gm13197	0.919053	-1.72002	2.52761	0.556229	0.455783	NA
ENSMUSG00000039145_Camk1d	4165.95	0.201935	0.108416	3.4277	0.0641115	0.147464
ENSMUSG00000039128_Cdc123	1480.95	0.0884475	0.0422724	4.37558	0.0364574	0.0945516
ENSMUSG00000025817_Nudt5	505.724	0.0827339	0.0794691	1.08167	0.298325	0.462434
ENSMUSG00000056718_Gm13199	1.72237	1.1186	1.04232	0.914386	0.338953	NA
ENSMUSG00000025816_Sec61a2	98.2011	0.169094	0.245805	0.454662	0.500129	0.661163
ENSMUSG00000043241_Upf2	346.779	-0.0652303	0.117162	0.307877	0.578986	0.728714
ENSMUSG00000045319_Proser2	176.714	-0.400557	0.243425	2.70629	0.099953	0.2071
ENSMUSG00000039063_Echdc3	6.8209	-1.63591	0.960217	2.1501	0.142561	0.271933
ENSMUSG00000087125_A230108P19Rik	0.702834	3.01208	3.01102	-0.968531	1	NA
ENSMUSG00000087485_Gm13383	2.87693	1.33977	0.960717	1.66836	0.196479	0.344759
ENSMUSG00000039046_Usp6nl	739.091	-0.0781609	0.176004	0.194339	0.65933	0.792142
ENSMUSG00000085716_Gm13388	1.08116	-1.81456	1.35707	2.24927	0.133677	NA
ENSMUSG00000086109_Gm13391	28.0233	0.410386	0.288077	2.01237	0.156021	0.290982
ENSMUSG00000102599_Gm38386	2.6353	0.464439	0.982839	0.19534	0.658509	0.79148
ENSMUSG00000002107_Celf2	4377.27	-0.25291	0.0659408	14.647	0.00012964	0.000800084
ENSMUSG00000015619_Gata3	1182.25	-1.66167	0.118033	195.115	2.43116717011841e-44	1.3363062298504e-41
ENSMUSG00000025782_Taf3	525.156	-0.070015	0.0782	0.801043	0.370782	0.537778
ENSMUSG00000025781_Atp5c1	7400.88	0.400146	0.0653425	37.2723	1.02733440931971e-09	2.18234117458024e-08
ENSMUSG00000037262_Kin	533.044	-0.34051	0.106342	10.2218	0.00138792	0.00626917
ENSMUSG00000025780_Itih5	98.4206	-1.57212	0.433029	11.7844	0.000597281	0.00303805
ENSMUSG00000061186_Sfmbt2	43.8879	2.22134	1.02131	1.38066	0.239988	0.397428
ENSMUSG00000083900_Gm13294	0.652073	-0.603424	1.43964	0.150523	0.698036	NA
ENSMUSG00000026778_Prkcq	1154.85	-1.87875	0.356147	23.3162	1.37437297678506e-06	1.44580420386797e-05
ENSMUSG00000102196_Gm38171	0.90188	3.10229	2.65772	1.7332	0.188003	NA
ENSMUSG00000103223_Gm37730	0.845716	0.368626	2.33408	-0.379238	1	NA
ENSMUSG00000082424_Gm13292	1.37218	0.916241	1.05629	0.712568	0.398592	NA
ENSMUSG00000026773_Pfkfb3	3820.3	0.53019	0.177539	8.84777	0.00293447	0.0117787
ENSMUSG00000102329_Gm10851	214.984	0.522841	0.272708	3.37559	0.0661688	0.151129
ENSMUSG00000102376_Gm37975	7.2238	-1.33094	0.960804	1.73709	0.187508	0.33324
ENSMUSG00000037197_Rbm17	2507.86	-0.0245152	0.0353523	0.480765	0.488076	0.650509
ENSMUSG00000026770_Il2ra	2875.76	-1.06134	0.304788	10.4462	0.001229	0.0056559
ENSMUSG00000104101_Gm37881	10.7268	-1.77249	0.456753	14.8463	0.000116634	0.000730841
ENSMUSG00000023206_Il15ra	779.37	1.1757	0.0980286	140.144	2.47572501322872e-32	5.96514072023014e-30
ENSMUSG00000058594_Fbxo18	1538.6	0.474492	0.106071	19.7065	9.02913595167835e-06	7.67346512089814e-05
ENSMUSG00000047909_Ankrd16	447.536	0.0648952	0.0928022	0.487431	0.485076	0.647836
ENSMUSG00000026768_Itga8	372.134	-0.189057	0.284201	0.405299	0.524365	0.682836
ENSMUSG00000086843_E030013I19Rik	26.7787	-1.34104	0.583357	5.33922	0.0208508	0.0603582
ENSMUSG00000026767_Fam188a	1137.69	0.167932	0.0668901	6.29061	0.0121379	0.0386975
ENSMUSG00000102630_Gm37289	3.76176	-1.34675	0.832728	2.48613	0.114854	0.230114
ENSMUSG00000104449_Gm37255	2.7217	-1.23414	0.891984	1.80064	0.179635	0.323298
ENSMUSG00000104406_Gm38014	5.15291	-0.707057	1.27977	0.295129	0.586953	0.735374
ENSMUSG00000026730_Pter	60.6697	-0.093452	0.313453	0.0818354	0.774825	0.874008
ENSMUSG00000049630_C1ql3	3.09386	0.768624	0.990382	0.738121	0.390263	0.557205
ENSMUSG00000102900_Gm37811	0.67352	-2.08184	3.02932	0.589575	0.442584	NA
ENSMUSG00000026727_Rsu1	3773.85	0.474553	0.114779	16.7724	4.21416172928854e-05	0.000302542
ENSMUSG00000102691_Gm37780	46.5168	1.07687	0.505062	3.35688	0.0669247	0.152598
ENSMUSG00000086358_Gm13270	1.06471	2.53092	3.02493	0.73092	0.392585	NA
ENSMUSG00000026723_Trdmt1	231.463	0.482304	0.183302	6.75374	0.00935513	0.0311761
ENSMUSG00000026728_Vim	18945.1	0.298396	0.122746	5.81602	0.0158809	0.0483519
ENSMUSG00000003418_St8sia6	814.201	0.0640761	0.261241	0.0545778	0.815281	0.899809
ENSMUSG00000063275_Hacd1	31.4968	0.879194	0.292086	8.93614	0.00279582	0.0113048
ENSMUSG00000103926_Gm37894	1.90693	-2.5167	2.85921	0.676727	0.410716	0.577603
ENSMUSG00000086657_Stamos	6.49233	-1.02049	0.742847	1.76297	0.184255	0.3292
ENSMUSG00000026718_Stam	368.511	0.505174	0.169474	8.61643	0.00333145	0.0130651
ENSMUSG00000103901_Gm37499	1.44887	0.533177	2.99277	0.0191986	0.889799	NA
ENSMUSG00000061531_Tmem236	4.38125	3.64006	2.30441	1.57081	0.210089	0.361254
ENSMUSG00000026712_Mrc1	896.253	3.0115	0.528481	22.0188	2.69993905235441e-06	2.62516462088788e-05
ENSMUSG00000057914_Cacnb2	62.4844	-1.55462	0.283494	29.5739	5.3825455317681e-08	7.81135258731593e-07
ENSMUSG00000070271_Gm13268	0.671214	0.339679	1.63372	0.0418403	0.837925	NA
ENSMUSG00000102673_Gm37437	2.13261	-2.17669	2.11587	1.08285	0.298061	0.462146
ENSMUSG00000026707_Nsun6	215.026	-0.439095	0.149666	8.56999	0.0034175	0.013349
ENSMUSG00000103778_Gm36930	2.68682	-0.695948	1.05564	0.445391	0.504532	0.664884
ENSMUSG00000017418_Arl5b	1734.84	-0.687884	0.12917	27.6842	1.42823242074453e-07	1.91180974493726e-06
ENSMUSG00000102258_Gm38257	17.6948	1.7046	0.888209	2.28516	0.130616	0.254335
ENSMUSG00000026748_Plxdc2	324.065	-0.286669	0.481734	0.245315	0.620394	0.761805
ENSMUSG00000053702_Nebl	366.625	-0.388371	0.794648	0.173645	0.676892	0.805429
ENSMUSG00000054057_A930004D18Rik	8.3275	0.279146	0.602966	0.202444	0.652755	0.787362
ENSMUSG00000086340_1810059C17Rik	0.763495	-1.14568	1.91196	0.56869	0.45078	NA
ENSMUSG00000026743_Mllt10	532.986	-0.294156	0.10424	7.94816	0.00481362	0.0178924
ENSMUSG00000092814_Gm23638	1.17577	-1.71929	1.54605	1.2818	0.257564	NA
ENSMUSG00000026740_Dnajc1	1072.74	-0.247245	0.154307	2.50589	0.113422	0.227843
ENSMUSG00000082520_Gm13349	1.2884	0.467672	1.08764	0.238431	0.625342	NA
ENSMUSG00000051154_Commd3	1209.3	0.394255	0.100405	15.3241	9.05515606994718e-05	0.000585987
ENSMUSG00000026739_Bmi1	742.946	0.0261799	0.0969724	0.0727695	0.787346	0.882806
ENSMUSG00000097638_Carlr	4.12652	-2.60931	0.987937	5.87307	0.0153742	0.0470454
ENSMUSG00000026737_Pip4k2a	10259.9	0.548906	0.122305	19.673	9.18916405404431e-06	7.80435569997998e-05
ENSMUSG00000026736_4930426L09Rik	5.80954	2.21032	0.692287	9.59569	0.00195035	0.00834461
ENSMUSG00000037683_Armc3	21.0199	-1.59455	0.492464	10.3579	0.00128919	0.00588822
ENSMUSG00000023094_Msrb2	56.2888	0.365976	0.340106	1.14188	0.285256	0.447939
ENSMUSG00000043415_Otud1	504.344	-0.244969	0.113635	4.61351	0.031721	0.0843574
ENSMUSG00000036617_Etl4	1.84458	-2.46	2.15401	1.18173	0.277005	0.438861
ENSMUSG00000060795_Gm13363	0.921547	0.612274	1.23953	0.258926	0.610859	NA
ENSMUSG00000036591_Arhgap21	477.984	-0.535289	0.143142	13.7222	0.000211936	0.00122663
ENSMUSG00000085206_Gm13380	0.914782	-1.48657	2.24619	-0.737119	1	NA
ENSMUSG00000075514_Gm13375	14.8593	0.321574	0.404557	0.593281	0.441153	0.608059
ENSMUSG00000026679_Enkur	35.4306	-0.584248	0.35865	2.38447	0.122546	0.242187
ENSMUSG00000048550_Thnsl1	92.9109	-0.163595	0.160987	1.03138	0.309835	0.474795
ENSMUSG00000083863_Gm13341	10.1557	-0.151404	0.486471	0.0955501	0.757237	0.86252
ENSMUSG00000083563_Gm13340	12.7885	0.194372	0.331012	0.342607	0.558328	0.711327
ENSMUSG00000026787_Gad2	1.57592	-1.74195	2.12553	-0.659798	1	NA
ENSMUSG00000026786_Apbb1ip	1007.32	0.36837	0.156863	5.49129	0.0191115	0.0562315
ENSMUSG00000069136_A130006I12Rik	3.19538	0.301892	0.750808	0.152344	0.696306	0.819054
ENSMUSG00000026784_Pdss1	96.5168	0.333967	0.133253	6.25069	0.0124145	0.0393794
ENSMUSG00000084625_Gm25544	0.898845	0.255099	1.54762	0.0839713	0.771986	NA
ENSMUSG00000058835_Abi1	3904.12	0.205842	0.0846254	5.8742	0.0153644	0.0470235
ENSMUSG00000083650_Gm13357	1.91624	-0.1554	1.52673	0.00317011	0.9551	0.985385
ENSMUSG00000026781_Acbd5	1189.25	0.141006	0.0605285	5.41854	0.019924	0.0581552
ENSMUSG00000026779_Mastl	52.0165	0.502293	0.266942	3.4395	0.063655	0.146721
ENSMUSG00000026775_Yme1l1	1548.7	0.104036	0.100953	1.05143	0.305178	0.469703
ENSMUSG00000081648_Gm13423	2.47316	-1.0556	1.0413	0.933946	0.33384	0.500546
ENSMUSG00000026774_4931423N10Rik	0.860229	-2.11027	3.0282	0.51235	0.474123	NA
ENSMUSG00000084098_Gm13422	0.945312	-2.27755	1.35123	2.72852	0.0985708	NA
ENSMUSG00000102704_Gm38309	2.13695	2.50495	1.89909	0.557415	0.455304	0.621015
ENSMUSG00000026771_Spopl	321.752	0.0475323	0.147282	0.102833	0.748456	0.856352
ENSMUSG00000026986_Hnmt	22.5595	2.5016	0.479564	26.886	2.15818370134571e-07	2.74875402773134e-06
ENSMUSG00000044103_Il1f9	4.46896	1.90396	1.44091	1.79266	0.180603	0.324509
ENSMUSG00000085999_Gm13411	2.07841	-2.96731	2.63132	1.11488	0.291023	0.454439
ENSMUSG00000026981_Il1rn	9418.69	1.09131	0.184897	32.9521	9.44578836931716e-09	1.62724751839294e-07
ENSMUSG00000026979_Psd4	2582.74	-0.408307	0.123166	10.769	0.00103215	0.00486456
ENSMUSG00000004113_Cacna1b	7.32853	0.159293	0.73249	0.0422516	0.837141	0.914045
ENSMUSG00000036893_Ehmt1	1289.4	0.0120834	0.114921	0.0109553	0.916639	0.963129
ENSMUSG00000026972_Arrdc1	2429.59	0.0640445	0.0542934	1.38965	0.238465	0.395657
ENSMUSG00000026974_Zmynd19	273.653	0.0188548	0.118904	0.0249801	0.874417	0.937983
ENSMUSG00000026975_Dph7	208.07	-0.0548208	0.157385	0.119172	0.729934	0.843493
ENSMUSG00000036850_Mrpl41	739.518	0.149683	0.0909122	2.69328	0.100772	0.207979
ENSMUSG00000036833_Pnpla7	1604.2	-0.272879	0.139407	3.79307	0.0514651	0.12419
ENSMUSG00000084383_Gm13370	0.619722	-1.16429	2.17712	0.232557	0.629634	NA
ENSMUSG00000083796_Gm13369	1.83702	-0.958594	1.42666	0.531627	0.465924	0.630929
ENSMUSG00000006476_Nsmf	659.379	-0.425496	0.19424	4.61534	0.0316873	0.0842934
ENSMUSG00000092845_Gm24328	0.899612	-0.729744	2.10327	0.126138	0.72247	NA
ENSMUSG00000036805_Noxa1	12.9169	-2.03681	0.696927	8.06855	0.00450402	0.0169398
ENSMUSG00000087028_Gm13387	9.18271	-2.83606	1.3029	2.76891	0.0961115	0.201059
ENSMUSG00000078202_Nrarp	73.1986	-0.250998	0.279859	0.785311	0.375522	0.542643
ENSMUSG00000059555_Tor4a	842.286	-0.0472938	0.178681	0.0691071	0.792641	0.886148
ENSMUSG00000013465_Nelfb	1647.5	-0.0527231	0.0716165	0.54014	0.462375	0.627524
ENSMUSG00000026969_Fam166a	1.3106	2.00731	1.63234	1.54601	0.213725	NA
ENSMUSG00000036752_Tubb4b	1691.19	-0.3658	0.145227	6.18896	0.012855	0.0405718
ENSMUSG00000036731_Cysrt1	0.878316	-0.792036	1.65844	0.271779	0.602141	NA
ENSMUSG00000044628_Rnf208	7.44152	-0.760735	0.672753	1.3714	0.241571	0.39917
ENSMUSG00000006471_Ndor1	177.614	-0.206384	0.123053	2.80472	0.0939872	0.197957
ENSMUSG00000078201_Tmem203	111.543	-0.0829889	0.185765	0.19712	0.657055	0.790489
ENSMUSG00000048707_Tprn	604.362	-0.250939	0.176632	1.9505	0.162533	0.299884
ENSMUSG00000026966_Ssna1	1102.93	-0.0743321	0.0981155	0.569025	0.450647	0.61689
ENSMUSG00000026965_Anapc2	2444.34	-0.292565	0.1224	5.60847	0.0178739	0.0534122
ENSMUSG00000026959_Grin1	4.28057	-1.64371	0.967363	2.49229	0.114405	0.229411
ENSMUSG00000036646_Man1b1	1792.65	-0.891474	0.0973832	82.0109	1.35339796271721e-19	1.19024583831165e-17
ENSMUSG00000088171_Gm25220	2.25676	-1.64015	1.08677	1.92779	0.165001	0.303387
ENSMUSG00000026958_Dpp7	627.392	0.232017	0.100252	5.31856	0.0210994	0.0608389
ENSMUSG00000026956_Uap1l1	1451.83	0.591746	0.140048	17.351	3.10737960311622e-05	0.000232343
ENSMUSG00000026955_Sapcd2	47.8601	0.150043	0.372391	0.154809	0.693982	0.817359
ENSMUSG00000015085_Entpd2	3.95284	3.34766	1.12923	6.15915	0.0130734	0.0411062
ENSMUSG00000015094_Npdc1	22.1814	0.458133	0.611581	0.538343	0.46312	0.628148
ENSMUSG00000036587_Fut7	66.0851	1.34698	0.506223	6.08695	0.0136184	0.042546
ENSMUSG00000026944_Abca2	1278.87	-0.381624	0.184979	4.13065	0.0421133	0.106046
ENSMUSG00000047617_BC029214	393.626	-0.0280708	0.0714145	0.154379	0.694385	0.817636
ENSMUSG00000015093_Clic3	19.1811	-1.25638	0.632271	3.72086	0.0537366	0.128455
ENSMUSG00000015083_C8g	58.9396	-0.398574	0.198178	4.00659	0.0453226	0.112216
ENSMUSG00000015095_Fbxw5	1360.12	-0.00126824	0.0894272	0.000199396	0.988734	1
ENSMUSG00000026942_Traf2	1629.51	-0.187874	0.107463	3.05142	0.0806665	0.17632
ENSMUSG00000015092_Edf1	3456.43	0.151614	0.0393756	14.8156	0.000118553	0.000740755
ENSMUSG00000026941_Mamdc4	10.4819	-0.0925837	0.671234	0.0181457	0.892844	0.949281
ENSMUSG00000036504_Phpt1	34.2505	-0.228669	0.253406	0.806876	0.369045	0.536059
ENSMUSG00000029419_Gm996	21.0234	-1.83525	0.561295	8.38956	0.00377383	0.0145279
ENSMUSG00000015087_Rabl6	953.258	-0.174289	0.114688	2.27959	0.131087	0.255053
ENSMUSG00000052403_Fcnaos	3.22936	-0.285632	0.957468	0.0681532	0.794045	0.887092
ENSMUSG00000026940_Ccdc183	2.36872	-4.63856	1.92681	5.81835	0.0158598	0.0482961
ENSMUSG00000026939_Tmem141	319.426	0.204496	0.145182	1.94822	0.162779	0.300188
ENSMUSG00000026938_Fcna	17.2009	-0.0344283	0.483072	0.00479113	0.944816	0.979073
ENSMUSG00000047356_Lcn10	0.747562	-1.18813	3.023	0.133229	0.715107	NA
ENSMUSG00000049086_Bmyc	144.451	0.0509949	0.125766	0.16378	0.6857	0.811736
ENSMUSG00000058740_Kcnt1	1.85431	-2.46108	3.00659	0.55269	0.457221	0.622643
ENSMUSG00000026933_Camsap1	266.451	-0.413579	0.126579	10.592	0.00113577	0.00528215
ENSMUSG00000036352_Ubac1	854.754	0.161673	0.0718398	5.0461	0.0246815	0.0689959
ENSMUSG00000026932_Nacc2	280.724	0.274861	0.127786	4.58858	0.0321857	0.0854382
ENSMUSG00000087679_C330006A16Rik	194.306	0.0316114	0.0920043	0.117811	0.731421	0.84438
ENSMUSG00000087595_1810012K08Rik	1.23385	-1.51874	1.56492	1.24141	0.265199	NA
ENSMUSG00000036327_Qsox2	178.328	-0.0541004	0.213492	0.0620688	0.803256	0.893189
ENSMUSG00000026930_Gpsm1	390.61	-0.79754	0.0876908	81.9343	1.40685884856524e-19	1.2311064819609e-17
ENSMUSG00000075467_Dnlz	425.29	0.0957177	0.0967109	0.975066	0.32342	0.488924
ENSMUSG00000026928_Card9	111.973	1.7231	0.383462	18.9878	1.31554348141254e-05	0.000107444
ENSMUSG00000086779_Gm13562	7.46247	0.0782668	0.41311	0.0354476	0.850661	0.922792
ENSMUSG00000036281_Snapc4	302.678	-0.368538	0.106587	11.9244	0.000554042	0.0028461
ENSMUSG00000085767_Gm13563	15.2079	-0.436801	0.296678	2.16582	0.141109	0.269809
ENSMUSG00000026927_Sdccag3	1262.88	-0.342544	0.0733108	21.7592	3.09099550815503e-06	2.94834707120059e-05
ENSMUSG00000026926_Pmpca	2184.2	-0.152094	0.0777223	3.82129	0.0506051	0.122543
ENSMUSG00000026925_Inpp5e	416.622	-0.10417	0.184112	0.315559	0.574289	0.725294
ENSMUSG00000026924_Sec16a	1167.6	-0.0775385	0.108028	0.510468	0.474936	0.638854
ENSMUSG00000086714_0610009E02Rik	3.35943	-1.24972	0.686583	3.25821	0.0710668	0.159682
ENSMUSG00000085543_Gm13568	1.64425	-0.926877	1.03171	0.776561	0.378195	NA
ENSMUSG00000026923_Notch1	245.61	-0.356928	0.449453	0.569986	0.450264	0.616559
ENSMUSG00000026921_Egfl7	22.1216	0.174933	0.684003	0.0488998	0.824989	0.905958
ENSMUSG00000026922_Agpat2	293.962	-0.0513543	0.109037	0.220341	0.63878	0.776522
ENSMUSG00000036186_Fam69b	9.03228	-1.58737	0.639001	5.99025	0.0143852	0.0445616
ENSMUSG00000026919_Lcn4	18.1514	-0.808653	0.372312	4.57096	0.0325183	0.086191
ENSMUSG00000036160_Surf6	523.19	-0.405506	0.142329	8.08644	0.00445978	0.01679
ENSMUSG00000015776_Med22	636.25	-0.0327817	0.0682923	0.230062	0.631478	0.770681
ENSMUSG00000062647_Rpl7a	3144.89	0.308833	0.117237	6.90903	0.00857614	0.0290144
ENSMUSG00000065258_Gm23969	2.99562	-0.458914	0.678586	0.444401	0.505006	0.66531
ENSMUSG00000015790_Surf1	447.944	0.525001	0.157212	10.8891	0.000967316	0.00460906
ENSMUSG00000014873_Surf2	358.722	-0.211083	0.121958	2.95932	0.085384	0.184069
ENSMUSG00000014867_Surf4	7057.16	-0.00756995	0.0617477	0.0150171	0.902468	0.955142
ENSMUSG00000049897_Stkld1	13.5565	0.333471	0.558191	0.310397	0.577437	0.727702
ENSMUSG00000052406_Rexo4	1082.88	0.174641	0.0787307	4.89939	0.0268662	0.0738705
ENSMUSG00000014852_Adamts13	4.79178	-0.650164	1.0049	0.34558	0.556626	0.709662
ENSMUSG00000015488_Cacfd1	466.367	0.202263	0.100314	4.03607	0.0445374	0.110755
ENSMUSG00000036067_Slc2a6	1976.1	-0.122386	0.124031	0.957482	0.327822	0.493543
ENSMUSG00000009614_Sardh	5.1931	0.0683226	0.861961	0.00617458	0.937368	0.975122
ENSMUSG00000009621_Vav2	1187.9	0.0706262	0.115621	0.368552	0.543794	0.699102
ENSMUSG00000109946_D2Bwg1423e	4.80886	0.917319	1.71275	-0.157072	1	1
ENSMUSG00000026918_Brd3	572.428	0.108915	0.0723926	2.2607	0.132694	0.257468
ENSMUSG00000026917_Wdr5	747.646	-0.242159	0.0787217	9.43171	0.00213266	0.00897879
ENSMUSG00000085929_Gm13421	1.48726	0.244471	1.39323	0.0212386	0.884131	NA
ENSMUSG00000015846_Rxra	701.4	-0.183924	0.0857086	4.59115	0.0321374	0.0853359
ENSMUSG00000026837_Col5a1	25.1326	0.340593	0.353044	0.908028	0.340638	0.507237
ENSMUSG00000026835_Fcnb	20.4464	1.06128	0.590591	3.24491	0.0716458	0.160696
ENSMUSG00000086425_F730016J06Rik	12.9383	-2.80867	0.959839	7.70764	0.00549875	0.0200036
ENSMUSG00000026833_Olfm1	5872.07	1.5888	0.22906	42.9028	5.75286948202994e-11	1.50500027218373e-09
ENSMUSG00000087196_Gm13373	111.753	1.0224	0.198133	25.7884	3.80976086606563e-07	4.57405350670501e-06
ENSMUSG00000026831_1700007K13Rik	1.15861	-2.29977	3.02054	0.64767	0.420947	NA
ENSMUSG00000035772_Mrps2	431.82	-0.20531	0.127428	2.59065	0.107496	0.218381
ENSMUSG00000082895_Rpsa-ps9	34.1045	0.0852093	0.318492	0.0690197	0.792769	0.886235
ENSMUSG00000026829_Gbgt1	14.1944	1.89438	0.430041	18.8357	1.42478971791788e-05	0.00011538
ENSMUSG00000063611_Gm10134	25.4935	2.23454	0.535205	15.308	9.13312549883139e-05	0.000590598
ENSMUSG00000026821_Ralgds	1490.27	0.449157	0.213141	4.1607	0.0413723	0.104569
ENSMUSG00000026816_Gtf3c5	515.403	-0.13602	0.110517	1.50565	0.219804	0.372854
ENSMUSG00000026815_Gfi1b	27.2045	-1.29328	0.643928	3.14957	0.075947	0.168029
ENSMUSG00000026812_Tsc1	329.112	0.293531	0.118589	6.07361	0.0137216	0.0427773
ENSMUSG00000026809_Spaca9	49.6329	0.181199	0.443427	0.135371	0.712927	0.831323
ENSMUSG00000026807_Ak8	69.08	0.0560081	0.383221	0.0203298	0.88662	0.945717
ENSMUSG00000035666_Gtf3c4	335.512	-0.291597	0.176375	2.72774	0.0986188	0.204988
ENSMUSG00000026806_Ddx31	263.634	0.114102	0.104775	1.18549	0.276241	0.438125
ENSMUSG00000079502_Cfap77	1.94136	0.0546706	2.38494	5.09103624111162e-05	0.994307	1
ENSMUSG00000083773_Gm13394	3.17915	-0.771296	0.711411	1.10933	0.292228	0.455834
ENSMUSG00000026803_Ttf1	399.607	-0.256548	0.105163	5.92147	0.0149575	0.0459702
ENSMUSG00000043535_Setx	581.246	0.195105	0.168864	1.29253	0.255583	0.415009
ENSMUSG00000035513_Ntng2	26.6536	0.717077	0.423826	2.56011	0.109591	0.221486
ENSMUSG00000079499_6530402F18Rik	405.513	-0.0534635	0.192173	0.0748239	0.784438	0.881066
ENSMUSG00000026799_Med27	587.468	0.084345	0.0506751	2.76992	0.0960511	0.200988
ENSMUSG00000039844_Rapgef1	1065.82	-0.192382	0.0636432	9.10975	0.00254251	0.0104316
ENSMUSG00000039826_Trub2	196.01	0.134697	0.136452	0.964871	0.325963	0.491332
ENSMUSG00000026798_Coq4	115.266	0.204087	0.161894	1.58636	0.207847	0.358878
ENSMUSG00000059316_Slc27a4	298.3	0.0264024	0.132713	0.0395223	0.842417	0.917138
ENSMUSG00000069020_Urm1	327.99	0.0122215	0.132788	0.00847335	0.926658	0.96903
ENSMUSG00000039798_2600006K01Rik	4.07752	0.355497	0.708907	0.245683	0.620131	0.76159
ENSMUSG00000039787_Cercam	156.82	0.337031	0.151331	4.94674	0.0261399	0.07223
ENSMUSG00000026790_Odf2	1278.27	-0.205434	0.0843696	5.91217	0.0150366	0.0461651
ENSMUSG00000019715_Gle1	1100.62	-0.108238	0.141943	0.581085	0.445887	0.612831
ENSMUSG00000057738_Sptan1	1651.51	-0.114487	0.141347	0.645641	0.421675	0.588233
ENSMUSG00000039715_Wdr34	71.0505	-0.205022	0.196776	1.08509	0.297561	0.461698
ENSMUSG00000054766_Set	4964.72	-0.0531125	0.0488628	1.18035	0.277284	0.439186
ENSMUSG00000026785_Pkn3	215.21	0.233987	0.192178	1.46677	0.225855	0.379909
ENSMUSG00000015335_Zdhhc12	134.914	0.888821	0.153444	33.0523	8.9710859234617e-09	1.55921373821905e-07
ENSMUSG00000039686_Zer1	467.217	-0.291357	0.0796255	13.3691	0.000255807	0.00145048
ENSMUSG00000039678_Tbc1d13	38.8325	1.10574	0.356777	8.54637	0.00346212	0.0134747
ENSMUSG00000015337_Endog	97.2153	-0.0573324	0.13466	0.181131	0.670403	0.800553
ENSMUSG00000039660_Spout1	378.448	-0.00361027	0.166831	0.000465429	0.982788	1
ENSMUSG00000039648_Kyat1	89.3413	0.00407715	0.214698	0.000357159	0.984922	1
ENSMUSG00000100747_1700084E18Rik	6.51389	-0.515866	0.451552	1.30248	0.253761	0.413124
ENSMUSG00000007476_Lrrc8a	22.0974	0.0778582	0.26429	0.0860871	0.769212	0.870803
ENSMUSG00000079484_Phyhd1	1.44062	-0.30898	1.29111	0.0327973	0.856289	NA
ENSMUSG00000075419_Dolk	280.066	-0.303108	0.0959017	9.96076	0.00159912	0.00707061
ENSMUSG00000052533_Nup188	355.115	0.146227	0.0769267	3.61251	0.0573464	0.134877
ENSMUSG00000026860_Sh3glb2	541.867	-0.160431	0.122292	1.70112	0.192142	0.339126
ENSMUSG00000026858_Miga2	131.749	-0.549409	0.171974	9.99073	0.0015733	0.00697752
ENSMUSG00000026856_Dolpp1	309.824	0.201685	0.176947	1.26308	0.261068	0.421168
ENSMUSG00000026853_Crat	580.079	0.623922	0.16487	13.9794	0.000184822	0.00108278
ENSMUSG00000039515_Ptpa	3536.98	0.00139926	0.0524847	0.000709668	0.978747	0.999348
ENSMUSG00000089762_Ier5l	4650.48	-0.8955	0.16946	26.5535	2.56343897681642e-07	3.20685122071295e-06
ENSMUSG00000047363_Cstad	11.5375	-0.579115	0.719724	0.613736	0.433385	0.599937
ENSMUSG00000086405_9330198N18Rik	1.97896	-2.22903	2.07565	1.14093	0.285457	0.448174
ENSMUSG00000087268_Gm14486	0.871738	0.921817	2.79526	0.178408	0.672745	NA
ENSMUSG00000075416_Gm14488	0.708122	-2.08707	3.02936	0.57937	0.446559	NA
ENSMUSG00000044320_1700001O22Rik	15.5364	-0.610174	0.570049	1.10754	0.292618	0.456281
ENSMUSG00000026857_Ntmt1	389.876	-0.261774	0.115978	5.06733	0.0243809	0.068395
ENSMUSG00000039483_Asb6	798.899	-0.560018	0.121142	21.0024	4.58711693202123e-06	4.2044189534821e-05
ENSMUSG00000039476_Prrx2	1.1924	2.7597	1.93995	2.24496	0.13405	NA
ENSMUSG00000050737_Ptges	96.1905	-0.282935	1.06711	0.0277741	0.867641	0.933962
ENSMUSG00000026848_Tor1b	1133.28	0.113765	0.0451029	6.35735	0.0116896	0.0374511
ENSMUSG00000026849_Tor1a	2315.01	0.30506	0.0815125	13.9032	0.00019247	0.00112284
ENSMUSG00000026851_BC005624	1771.24	-0.122187	0.0492949	6.13791	0.0132314	0.0415138
ENSMUSG00000026854_Usp20	422.998	-0.398962	0.154484	6.51658	0.0106873	0.0348626
ENSMUSG00000075415_Fnbp1	6380.36	-0.468075	0.101653	20.9196	4.78968020047186e-06	4.37589496977229e-05
ENSMUSG00000087269_D330023K18Rik	31.1785	-0.306415	0.267908	1.30255	0.253748	0.413124
ENSMUSG00000000194_Gpr107	1176.06	0.284399	0.111957	6.4133	0.0113269	0.0365557
ENSMUSG00000062661_Ncs1	46.8387	-0.0502383	0.278635	0.0318567	0.858343	0.9277
ENSMUSG00000055632_Hmcn2	22.7336	0.572991	0.534275	1.05416	0.304551	0.468985
ENSMUSG00000076441_Ass1	980.941	0.368888	0.211925	2.88462	0.089429	0.190755
ENSMUSG00000026843_Fubp3	411.211	0.243889	0.189297	1.62725	0.202084	0.351822
ENSMUSG00000039356_Exosc2	486.668	-0.142585	0.0848163	2.82057	0.0930635	0.19653
ENSMUSG00000087549_Gm13427	0.803937	-0.928532	1.26316	0.59527	0.440388	NA
ENSMUSG00000026842_Abl1	855.522	0.207357	0.156377	1.72848	0.188605	0.334696
ENSMUSG00000043102_Qrfp	53.0162	-0.795925	0.432488	3.37953	0.0660108	0.150846
ENSMUSG00000026841_Fibcd1	33.6541	-0.777057	0.42413	3.36299	0.0666768	0.152131
ENSMUSG00000001864_Aif1l	48.0707	-1.53275	0.773976	2.57463	0.108589	0.220145
ENSMUSG00000001855_Nup214	1038.32	0.0177147	0.0838802	0.0445694	0.832798	0.911605
ENSMUSG00000081480_Gm13608	2.40565	0.909696	1.17265	0.574014	0.448668	0.615162
ENSMUSG00000050592_Fam78a	98.4881	-0.148392	0.312483	0.218814	0.639945	0.777509
ENSMUSG00000051373_Plpp7	4.55233	2.27984	1.62393	0.417837	0.518018	0.676925
ENSMUSG00000039262_Prrc2b	782.523	-0.438898	0.152781	8.06179	0.00452086	0.0169909
ENSMUSG00000039254_Pomt1	133.64	0.0139093	0.168171	0.0068217	0.934175	0.973239
ENSMUSG00000002550_Uck1	629.365	-0.440294	0.0772511	32.2937	1.32539630404725e-08	2.2244652282335e-07
ENSMUSG00000066068_Gm13611	1.91217	0.538157	0.837286	0.399403	0.527398	0.685465
ENSMUSG00000044627_Swi5	2332.19	0.101733	0.0549873	3.42236	0.064319	0.147825
ENSMUSG00000002546_Golga2	720.719	-0.00877832	0.133889	0.00427296	0.947881	0.980838
ENSMUSG00000026825_Dnm1	9.43087	0.00772313	1.08408	-0.04838	1	1
ENSMUSG00000039205_Ciz1	991.671	-0.201235	0.0648269	9.62776	0.00191659	0.00822818
ENSMUSG00000039195_1110008P14Rik	408.586	0.378879	0.110567	11.6878	0.000629111	0.00317243
ENSMUSG00000026822_Lcn2	190.295	-0.0142495	0.9041	0.000215813	0.988279	1
ENSMUSG00000026820_Ptges2	270.923	0.352102	0.0922402	14.5467	0.000136731	0.000837382
ENSMUSG00000026819_Slc25a25	1529.46	-0.215916	0.0937143	5.27305	0.0216581	0.0621747
ENSMUSG00000039164_Naif1	381.45	0.170526	0.124218	1.88051	0.170277	0.310747
ENSMUSG00000103175_Gm37169	33.7319	-1.18852	0.616353	3.23466	0.0720954	0.161472
ENSMUSG00000039157_Fam102a	2895.43	-0.951027	0.110661	72.1303	2.01448243376113e-17	1.30748086817065e-15
ENSMUSG00000026810_Dpm2	872.032	0.100725	0.0550539	3.34482	0.0674169	0.153382
ENSMUSG00000079442_St6galnac4	961.168	0.116575	0.0701567	2.75265	0.0970935	0.202607
ENSMUSG00000093147_Gm23369	0.951092	-2.85094	2.74986	1.13802	0.28607	NA
ENSMUSG00000026811_St6galnac6	754.103	-0.136951	0.162868	0.691888	0.405523	0.572369
ENSMUSG00000026817_Ak1	8.12458	0.643262	0.706326	0.716994	0.397132	0.564046
ENSMUSG00000026814_Eng	205.603	-0.371641	0.355655	0.960695	0.327012	0.492576
ENSMUSG00000009566_Fpgs	191.774	-0.531298	0.136447	15.0947	0.00010225	0.000652093
ENSMUSG00000009555_Cdk9	2308.14	0.0573553	0.0796792	0.517922	0.47173	0.636343
ENSMUSG00000059013_Sh2d3c	627.37	-0.139751	0.138223	1.0055	0.315982	0.481279
ENSMUSG00000009551_6330409D20Rik	0.881349	-1.86407	2.50897	0.630009	0.427352	NA
ENSMUSG00000039021_Ttc16	1.96921	1.11887	2.86665	-0.0148324	1	1
ENSMUSG00000009563_Tor2a	800.819	0.503086	0.060231	69.5455	7.46709747479504e-17	4.39260125365117e-15
ENSMUSG00000053746_Ptrh1	24.3785	0.565537	0.268322	4.4055	0.0358232	0.0932505
ENSMUSG00000038987_Cfap157	3.35799	-0.0194491	0.679545	0.000782351	0.977686	0.998926
ENSMUSG00000026797_Stxbp1	237.224	0.022952	0.229145	0.0095099	0.922314	0.966514
ENSMUSG00000087496_Gm13523	1.83152	4.27863	1.45483	8.90955	0.00283683	0.0114417
ENSMUSG00000026796_Fam129b	1767.99	0.266795	0.155101	2.88327	0.0895044	0.190893
ENSMUSG00000026792_Lrsam1	126.059	0.489077	0.264019	3.18381	0.0743713	0.165145
ENSMUSG00000038900_Rpl12	2899.96	-0.0405813	0.156401	0.066506	0.796494	0.888478
ENSMUSG00000026791_Slc2a8	263.984	-0.189377	0.203621	0.839457	0.359552	0.526265
ENSMUSG00000038860_Garnl3	32.9317	-0.277935	0.239259	1.32346	0.249972	0.408773
ENSMUSG00000104277_Gm38299	1.18287	1.36446	2.04172	0.372752	0.541508	NA
ENSMUSG00000038831_Ralgps1	108.608	-0.662072	0.174508	14.2158	0.000162997	0.00097053
ENSMUSG00000004105_Angptl2	29.3853	-0.522093	0.751648	0.448817	0.502897	0.66332
ENSMUSG00000068966_Zbtb34	87.788	0.42692	0.234271	3.2713	0.0705016	0.158798
ENSMUSG00000026788_Zbtb43	479.496	-0.529667	0.0879099	36.0565	1.91674886040483e-09	3.83982866807069e-08
ENSMUSG00000081244_Gm13529	1.07597	0.0240799	1.07074	0.000424738	0.983557	NA
ENSMUSG00000038740_Mvb12b	117.077	-0.0424921	0.26183	0.0245683	0.875448	0.938517
ENSMUSG00000086904_Gm13404	1.85685	4.31705	1.47635	8.7695	0.0030631	0.0122114
ENSMUSG00000038718_Pbx3	193.739	0.141489	0.197589	0.508609	0.475742	0.639622
ENSMUSG00000038696_Mapkap1	1951.29	-0.147276	0.0665936	4.887	0.0270597	0.0742864
ENSMUSG00000081992_Gm13408	2.16098	0.671988	0.888398	0.489854	0.483992	0.64689
ENSMUSG00000087635_Gm13414	8.04671	-0.0452173	0.398337	0.0127565	0.910075	0.959247
ENSMUSG00000026867_Gapvd1	2030.63	-0.0331577	0.0836681	0.15653	0.692372	0.816229
ENSMUSG00000026864_Hspa5	48876.4	-0.426208	0.128003	10.9035	0.000959831	0.00457768
ENSMUSG00000070953_Rabepk	216.88	0.303245	0.168103	3.19376	0.07392	0.164351
ENSMUSG00000035949_Fbxw2	1683.39	0.110319	0.0888483	1.53056	0.216028	0.368546
ENSMUSG00000026869_Psmd5	1016.12	0.158674	0.0609112	6.77081	0.00926606	0.030932
ENSMUSG00000026870_Cutal	0.841806	-0.503043	2.20788	0.043308	0.835146	NA
ENSMUSG00000026873_Phf19	228.212	-0.411225	0.10713	14.657	0.000128955	0.000796416
ENSMUSG00000026875_Traf1	12293.6	-0.198977	0.081	5.9913	0.0143766	0.0445429
ENSMUSG00000083533_Gm13450	18.2631	-0.19052	0.330033	0.320964	0.571029	0.722162
ENSMUSG00000026874_Hc	29.8993	-1.04527	0.43125	5.574	0.0182291	0.0542283
ENSMUSG00000035875_AI182371	7.03958	0.64729	0.650851	0.932467	0.334223	0.501001
ENSMUSG00000057110_Cntrl	1649.69	-8.21565931687589e-05	0.0512535	2.55722932251956e-06	0.998724	1
ENSMUSG00000026878_Rab14	5336.53	0.159493	0.0590239	7.28965	0.00693529	0.0243289
ENSMUSG00000026879_Gsn	9795.37	0.583602	0.222118	6.38726	0.0114942	0.0369601
ENSMUSG00000026880_Stom	3665.33	-0.112906	0.121094	0.854872	0.355178	0.521776
ENSMUSG00000075391_Gm13443	0.745851	-1.00175	1.22768	0.72162	0.395613	NA
ENSMUSG00000035778_Ggta1	2785.28	0.128219	0.155163	0.663262	0.415411	0.581972
ENSMUSG00000106856_Gm43761	11.1146	-1.60284	0.525596	9.1578	0.0024766	0.0101921
ENSMUSG00000026883_Dab2ip	42.0181	-0.336906	0.409015	0.675975	0.410976	0.577773
ENSMUSG00000026885_Ttll11	19.0941	-1.05901	0.56461	3.1892	0.0741261	0.164684
ENSMUSG00000026895_Ndufa8	1546.24	0.334266	0.0812131	16.8419	4.06267937756773e-05	0.000293223
ENSMUSG00000026890_Lhx6	2.81868	-3.66968	1.97535	2.78905	0.0949107	0.199115
ENSMUSG00000026889_Rbm18	1242.25	-0.418995	0.0575342	52.8749	3.55478221154869e-13	1.33685061072172e-11
ENSMUSG00000026887_Mrrf	237.247	-0.130386	0.107676	1.46224	0.226573	0.380916
ENSMUSG00000087187_Gm13431	0.670422	-0.931593	2.37236	0.240081	0.624148	NA
ENSMUSG00000047250_Ptgs1	72.4437	1.05745	0.352382	8.24078	0.00409595	0.0155838
ENSMUSG00000083716_Gm13436	32.3855	0.127113	0.226617	0.311549	0.576731	0.727073
ENSMUSG00000009030_Pdcl	722.497	-0.00736527	0.113484	0.00416127	0.948566	0.981028
ENSMUSG00000075376_Rc3h2	503.937	-0.159288	0.111295	2.04751	0.152456	0.285879
ENSMUSG00000066798_Zbtb6	263.062	-0.00119596	0.117674	0.000102536	0.991921	1
ENSMUSG00000050714_Zbtb26	42.2434	-2.33918	0.565744	15.1435	9.9638489356537e-05	0.000636825
ENSMUSG00000035437_Rabgap1	861.505	-0.178752	0.146571	1.46746	0.225747	0.379786
ENSMUSG00000026915_Strbp	1176.98	-0.375495	0.159925	5.46369	0.0194156	0.0569547
ENSMUSG00000053164_Gpr21	0.755117	-2.52013	2.10755	1.89098	0.169091	NA
ENSMUSG00000035392_Dennd1a	838.47	0.484287	0.137733	12.1244	0.000497658	0.00258973
ENSMUSG00000107586_Gm44283	2.54545	0.723323	1.27753	0.0709352	0.78998	0.884435
ENSMUSG00000108155_Gm44443	0.937624	-0.852623	3.0186	0.305117	0.580692	NA
ENSMUSG00000107529_Gm44291	3.67175	0.16423	0.966893	0.0214897	0.883453	0.943857
ENSMUSG00000000247_Lhx2	17.6874	-1.05226	0.736744	1.85035	0.173743	0.315313
ENSMUSG00000085950_Gm13589	3.02995	-0.770346	1.89097	0.196125	0.657867	0.790978
ENSMUSG00000084124_Gm13588	1.62222	-0.802854	0.918236	0.700184	0.402722	NA
ENSMUSG00000026749_Nek6	2284.48	-0.331051	0.147268	5.03609	0.0248244	0.0693611
ENSMUSG00000108210_Gm44179	0.748597	-0.0977335	2.18537	-0.00208513	1	NA
ENSMUSG00000026750_Psmb7	1302.12	0.3029	0.0784309	14.8658	0.000115435	0.000725138
ENSMUSG00000082931_Gm13586	1.9669	-0.827302	0.915648	0.722329	0.395381	0.562027
ENSMUSG00000063972_Nr6a1	16.2116	-0.505113	0.573523	0.645541	0.421711	0.588233
ENSMUSG00000107468_5730507A11Rik	0.905476	0.933485	1.51724	0.49143	0.48329	NA
ENSMUSG00000046618_Olfml2a	3.24634	0.694166	1.7958	0.162592	0.686782	0.812178
ENSMUSG00000035295_Wdr38	4.54	-0.747515	0.559248	1.73911	0.187252	0.33302
ENSMUSG00000062997_Rpl35	2230.49	-0.0684619	0.105822	0.415645	0.519118	0.678011
ENSMUSG00000026755_Arpc5l	1669.91	0.20143	0.0794158	6.4057	0.0113755	0.0366587
ENSMUSG00000026754_Golga1	229.994	0.0823011	0.211688	0.147901	0.70055	0.822013
ENSMUSG00000035236_Scai	105.382	-0.233041	0.147539	2.47817	0.115436	0.231149
ENSMUSG00000082315_Gm16523	1.73916	-0.538661	2.39743	0.00625005	0.936987	NA
ENSMUSG00000107955_Gm44027	1.99076	-0.00182571	1.9082	7.65697726450298e-05	0.993018	1
ENSMUSG00000026753_Ppp6c	2446.01	0.0457663	0.0593307	0.594608	0.440643	0.607706
ENSMUSG00000083240_Gm13453	2.4775	0.162107	0.872518	0.0307455	0.860809	0.929281
ENSMUSG00000082536_Gm13456	15.1301	-0.00877046	0.308633	0.00080496	0.977366	0.998803
ENSMUSG00000081999_Gm13461	10.6538	0.103581	0.368288	0.0788092	0.778918	0.876756
ENSMUSG00000080994_Gm13464	4.68183	-0.030728	0.589405	0.00268766	0.958654	0.987338
ENSMUSG00000026866_Kynu	680.771	0.637425	0.271097	4.96114	0.0259232	0.0717599
ENSMUSG00000049744_Arhgap15	2726.14	-0.216841	0.0884803	5.95964	0.014637	0.0451781
ENSMUSG00000085089_Arhgap15os	0.78983	1.34889	2.21388	0.451118	0.501804	NA
ENSMUSG00000036890_Gtdc1	97.2636	0.393864	0.272167	2.08622	0.148633	0.280686
ENSMUSG00000083849_Gm13477	3.13051	2.04567	1.15069	1.81691	0.177681	0.320668
ENSMUSG00000026872_Zeb2	2012.09	0.954348	0.122361	59.2126	1.41523091135068e-14	6.51636034024796e-13
ENSMUSG00000052248_Zeb2os	27.3045	1.04814	0.430123	5.43226	0.019768	0.0577479
ENSMUSG00000098320_Vis1	4.55519	1.51244	0.693566	4.70875	0.0300094	0.0806472
ENSMUSG00000085591_Gm13479	0.661207	0.819493	3.02996	0.103631	0.747515	NA
ENSMUSG00000086644_Gm13470	1.42758	1.8137	1.80925	1.10756	0.292612	NA
ENSMUSG00000052155_Acvr2a	654.31	0.197417	0.27085	0.495297	0.481574	0.644922
ENSMUSG00000026761_Orc4	1137.68	0.0998341	0.0836942	1.41461	0.234293	0.390379
ENSMUSG00000036792_Mbd5	191.596	0.130059	0.251637	0.255043	0.613547	0.757257
ENSMUSG00000081272_Gm13509	53.7929	0.413483	0.169035	5.97298	0.0145267	0.0448972
ENSMUSG00000069495_Epc2	164.628	-0.271355	0.110292	6.04968	0.0139088	0.0432917
ENSMUSG00000026764_Kif5c	19.0602	0.0795831	0.69405	0.0092964	0.923189	0.966942
ENSMUSG00000026765_Lypd6b	11.6747	-2.53926	0.887285	6.65944	0.0098632	0.0326036
ENSMUSG00000026766_Mmadhc	1151.41	0.215355	0.0678313	10.0571	0.00151761	0.00677149
ENSMUSG00000017144_Rnd3	1484.88	0.362754	0.126006	8.17629	0.00424415	0.0160741
ENSMUSG00000087701_Gm13493	8.4664	-0.0259549	0.413485	0.0039047	0.950175	0.982182
ENSMUSG00000036249_Rbm43	387.654	0.375122	0.106669	12.2842	0.000456813	0.00240493
ENSMUSG00000026946_Nmi	1565.47	0.579158	0.099321	33.4951	7.14434078617594e-09	1.27059464194185e-07
ENSMUSG00000053475_Tnfaip6	222.643	0.776904	0.329862	5.08913	0.0240762	0.0677454
ENSMUSG00000036202_Rif1	876.989	-0.411735	0.106598	14.7629	0.000121911	0.000759308
ENSMUSG00000026950_Neb	12.3739	0.413993	0.922982	0.10512	0.74577	0.854662
ENSMUSG00000036093_Arl5a	3259.52	0.523519	0.0615037	71.9689	2.18612323344414e-17	1.4033475019361e-15
ENSMUSG00000017412_Cacnb4	12.3364	-0.190735	0.491723	0.135881	0.712411	0.830988
ENSMUSG00000025201_Bloc1s2-ps	11.1197	0.520377	0.365886	1.98453	0.158914	0.294839
ENSMUSG00000055371_Stam2	1209.91	0.237206	0.0564845	17.6151	2.70430939992495e-05	0.000206092
ENSMUSG00000036053_Fmnl2	350.027	0.567675	0.2717	4.10737	0.0426968	0.107086
ENSMUSG00000061136_Prpf40a	3516.28	-0.0360091	0.0665678	0.292152	0.588845	0.736642
ENSMUSG00000026960_Arl6ip6	662.148	0.211423	0.0796735	7.01176	0.00809759	0.027726
ENSMUSG00000075334_Rprm	4.4684	-1.06908	0.8098	1.8914	0.169044	0.308949
ENSMUSG00000026824_Kcnj3	1.21914	-2.30919	3.01627	0.511314	0.474571	NA
ENSMUSG00000026826_Nr4a2	24997.9	-0.313785	0.0998674	9.75532	0.00178804	0.007752
ENSMUSG00000054181_A930012O16Rik	29.5255	-0.2682	0.427834	0.377354	0.539023	0.695537
ENSMUSG00000026827_Gpd2	5357.31	-0.531604	0.09719	29.4627	5.70032835230359e-08	8.24531869972598e-07
ENSMUSG00000081642_Gm13532	0.817791	0.810868	1.39855	0.272923	0.601378	NA
ENSMUSG00000026832_Cytip	29775.3	-0.356501	0.0862662	16.9035	3.93284785851871e-05	0.000285022
ENSMUSG00000086862_Gm13546	224.519	0.550815	0.189534	8.37786	0.0037982	0.0146121
ENSMUSG00000026834_Acvr1c	6.46855	-1.9619	1.17571	1.42209	0.23306	0.388928
ENSMUSG00000026836_Acvr1	110.389	0.61548	0.244856	6.13217	0.0132744	0.0416191
ENSMUSG00000026839_Upp2	9.49873	-0.157757	0.417474	0.13785	0.710427	0.829722
ENSMUSG00000036641_Ccdc148	19.3453	1.14589	0.565419	3.72338	0.0536556	0.128349
ENSMUSG00000026991_Pkp4	254.034	-0.926841	0.160769	32.3642	1.27819328584679e-08	2.14934433123893e-07
ENSMUSG00000026989_Dapl1	56.8557	-1.69568	0.368645	19.3801	1.07115406611234e-05	8.98023301661105e-05
ENSMUSG00000035168_Tanc1	270.388	-0.490551	0.184966	6.94201	0.00841944	0.0285667
ENSMUSG00000026988_Wdsub1	360.419	0.782092	0.180963	17.9382	2.28199208537925e-05	0.000177053
ENSMUSG00000026987_Baz2b	2164.4	0.110853	0.108207	1.03773	0.308351	0.473097
ENSMUSG00000085975_Gm13572	4.38337	0.474708	0.730495	0.345837	0.556479	0.709526
ENSMUSG00000087181_Gm13570	0.832035	1.35795	2.03965	0.50159	0.478802	NA
ENSMUSG00000086603_Gm13620	5.67263	0.313634	0.561635	0.293709	0.587854	0.736232
ENSMUSG00000026977_March7	3898.51	-0.149996	0.0464579	10.4071	0.00125532	0.00575143
ENSMUSG00000060703_Cd302	1182.79	1.23615	0.174111	47.3912	5.81416630074667e-12	1.86615640627433e-10
ENSMUSG00000080198_Gm13573	3.10277	0.663986	0.88729	0.458869	0.498153	0.659842
ENSMUSG00000026980_Ly75	2121.81	-0.305498	0.157078	3.71437	0.0539459	0.128856
ENSMUSG00000086196_Gm13571	8.48087	1.27153	0.949291	1.61402	0.203927	0.354049
ENSMUSG00000054580_Pla2r1	3.03421	-0.258396	1.52743	0.0608389	0.805175	0.894701
ENSMUSG00000026970_Rbms1	4667.55	0.0862247	0.0594661	2.09843	0.147451	0.279082
ENSMUSG00000064289_Tank	4477.06	-0.0465428	0.0933226	0.247859	0.618587	0.760504
ENSMUSG00000026914_Psmd14	3388.03	0.376362	0.0618321	36.8541	1.27306428536983e-09	2.64367505494332e-08
ENSMUSG00000035000_Dpp4	6477.33	0.35467	0.198492	3.01312	0.0825931	0.179593
ENSMUSG00000087518_Gm13561	23.7531	0.454425	0.46082	0.910929	0.339868	0.506305
ENSMUSG00000087681_Gm13565	2.06024	0.894091	1.79259	0.270186	0.603207	0.74878
ENSMUSG00000087422_Gm13564	4.02948	0.985649	0.685495	2.0169	0.155556	0.290361
ENSMUSG00000000394_Gcg	4.88886	0.917982	0.629002	2.0445	0.152757	0.286306
ENSMUSG00000000392_Fap	26.0869	0.23901	0.296675	0.649494	0.420293	0.586989
ENSMUSG00000026896_Ifih1	1274.67	0.960213	0.264824	11.9255	0.000553715	0.00284525
ENSMUSG00000026893_Gca	801.437	0.843359	0.0687136	149.207	2.58353344005235e-34	7.32931768985174e-32
ENSMUSG00000059742_Kcnh7	14.307	0.30486	0.793626	0.116526	0.732833	0.845498
ENSMUSG00000082127_Gm13577	30.4794	0.0911944	0.212798	0.183509	0.668375	0.798807
ENSMUSG00000084104_Gm13578	3.28399	0.662769	0.787808	0.638108	0.424397	0.591
ENSMUSG00000026888_Grb14	1.09239	1.29184	2.67539	0.174032	0.676553	NA
ENSMUSG00000034903_Cobll1	280.584	-0.417564	0.234784	2.97763	0.0844227	0.182691
ENSMUSG00000086881_Gm13594	2.44562	-0.31281	1.09339	0.0637066	0.800731	0.891565
ENSMUSG00000061171_Slc38a11	0.863432	2.41695	3.02204	0.778278	0.377668	NA
ENSMUSG00000057182_Scn3a	88.3915	-0.544557	0.477756	1.08853	0.296796	0.460883
ENSMUSG00000026994_Galnt3	72.1806	-0.676506	0.253264	6.95927	0.00833861	0.0283526
ENSMUSG00000034848_Ttc21b	124.451	-1.12426	0.341342	9.61776	0.00192705	0.008261
ENSMUSG00000034780_B3galt1	5.3764	0.654166	1.43926	0.201908	0.653185	0.787772
ENSMUSG00000027030_Stk39	417.634	-1.18318	0.13098	79.2188	5.55985079767927e-19	4.61284036228211e-17
ENSMUSG00000075312_Gm13597	0.861709	0.619528	1.45534	0.234619	0.62812	NA
ENSMUSG00000027035_Cers6	1683.82	0.482777	0.102524	22.0465	2.66122677445668e-06	2.59038836391359e-05
ENSMUSG00000103734_Gm37651	5.68202	-1.20927	1.3698	0.829817	0.362325	0.529226
ENSMUSG00000104262_Gm37747	1.1572	-0.358346	2.96811	0.00126683	0.971607	NA
ENSMUSG00000103546_Gm37666	7.18481	-0.0113903	0.729321	0.000233022	0.987821	1
ENSMUSG00000102662_Gm38377	2.1115	-1.29741	1.66461	0.703509	0.401607	0.568612
ENSMUSG00000034738_Nostrin	645.802	0.297954	0.122819	5.8549	0.0155338	0.0474511
ENSMUSG00000005233_Spc25	303.077	0.0308463	0.145813	0.0441587	0.833559	0.912009
ENSMUSG00000027068_Dhrs9	147.668	0.0793302	0.307824	0.0627473	0.802205	0.892398
ENSMUSG00000063145_Bbs5	136.404	0.274075	0.322482	0.65538	0.418196	0.584695
ENSMUSG00000075307_Klhl41	29.7845	-0.28636	0.578673	0.207958	0.648372	0.783688
ENSMUSG00000027086_Fastkd1	234.809	-0.0548689	0.218009	0.0607899	0.805252	0.89473
ENSMUSG00000042133_Ppig	2683.02	-0.204806	0.0336224	37.0846	1.13113004714349e-09	2.38554513179939e-08
ENSMUSG00000082345_Gm13622	3.48263	-0.454459	0.721317	0.371442	0.542219	0.698024
ENSMUSG00000070883_Ccdc173	10.6561	0.357986	0.753999	0.208128	0.648239	0.783688
ENSMUSG00000027088_Phospho2	706.211	-0.144583	0.0946655	2.32736	0.127117	0.249094
ENSMUSG00000042155_Klhl23	36.0529	-1.57913	1.01905	1.48277	0.223342	0.376964
ENSMUSG00000068882_Ssb	3488.26	-0.107917	0.0567157	3.61164	0.0573765	0.134919
ENSMUSG00000051730_Mettl5	198.071	0.163236	0.0970008	2.82599	0.0927495	0.196042
ENSMUSG00000085735_Mettl5os	3.94275	-1.41674	0.693932	4.01001	0.0452309	0.112004
ENSMUSG00000044308_Ubr3	632.371	0.0177147	0.133622	0.0174945	0.894773	0.950717
ENSMUSG00000042064_Myo3b	50.865	-0.133082	0.749852	0.0230851	0.879236	0.941087
ENSMUSG00000047965_Rpl9-ps7	1.64618	0.934026	0.913403	1.08881	0.296735	NA
ENSMUSG00000075304_Sp5	4.16398	-4.04034	2.03999	3.75782	0.052561	0.126347
ENSMUSG00000075302_Erich2	0.86469	-2.04375	3.02623	0.537424	0.463502	NA
ENSMUSG00000070880_Gad1	3.31361	2.06727	2.84589	0.0535767	0.816953	0.900676
ENSMUSG00000097025_Gm26558	19.1434	-0.171389	0.315532	0.287335	0.591934	0.739056
ENSMUSG00000014959_Gorasp2	3128.86	0.0849049	0.0573656	2.18607	0.139264	0.267036
ENSMUSG00000041997_Tlk1	839.074	-0.245256	0.0965022	6.40443	0.0113836	0.0366782
ENSMUSG00000041975_Mettl8	138.859	-0.738122	0.134161	30.0876	4.12967235082457e-08	6.15044936313745e-07
ENSMUSG00000041966_Dcaf17	331.719	0.0840365	0.107747	0.605129	0.436628	0.603192
ENSMUSG00000027015_Cybrd1	2.83668	-1.57648	2.58269	0.25147	0.616042	0.759106
ENSMUSG00000027012_Dync1i2	1011.98	0.339609	0.0861894	15.4983	8.25793065078468e-05	0.000541973
ENSMUSG00000027010_Slc25a12	1548.92	0.0324689	0.121749	0.0700751	0.791227	0.885152
ENSMUSG00000027018_Hat1	2351.81	0.140596	0.0733343	3.65817	0.0557948	0.132118
ENSMUSG00000041921_Metap1d	297.849	-0.675929	0.204877	10.4118	0.00125213	0.00573982
ENSMUSG00000084946_Dlx1as	2.19889	2.21738	0.851739	7.02295	0.00804716	0.0275748
ENSMUSG00000023391_Dlx2	12.9258	-2.32641	1.28289	3.09714	0.0784299	0.172438
ENSMUSG00000027111_Itga6	390.559	0.16517	0.251762	0.3995	0.527348	0.68546
ENSMUSG00000006494_Pdk1	781.534	-0.655048	0.096492	45.7506	1.34309734008229e-11	3.98591400987833e-10
ENSMUSG00000049044_Rapgef4	47.2003	-0.362415	0.363454	0.986319	0.320644	0.486274
ENSMUSG00000004085_Map3k20	320.961	0.0149385	0.171398	0.00739706	0.931462	0.971909
ENSMUSG00000055612_Cdca7	394.298	-0.170015	0.118782	2.04102	0.153107	0.286765
ENSMUSG00000027109_Sp3	2012.64	0.111308	0.0349752	10.1261	0.00146188	0.00654775
ENSMUSG00000063714_Sp3os	96.6105	0.66926	0.173081	14.7713	0.00012137	0.000756477
ENSMUSG00000027108_Ola1	969.936	0.344745	0.0940277	13.3164	0.000263091	0.00148604
ENSMUSG00000082455_Gm13665	1.08437	-0.753857	3.00069	0.0394856	0.84249	NA
ENSMUSG00000041777_Cir1	159.607	0.148709	0.124204	1.43312	0.231256	0.386811
ENSMUSG00000008226_Scrn3	146.983	0.0884161	0.283369	0.0937281	0.75949	0.864359
ENSMUSG00000041762_Gpr155	138.938	0.897083	0.180278	24.5055	7.4097517428723e-07	8.37002709618608e-06
ENSMUSG00000085768_Gm13707	1.13639	-1.22504	3.01771	0.175729	0.67507	NA
ENSMUSG00000075284_Wipf1	2839.88	0.251885	0.164886	2.28846	0.130339	0.25406
ENSMUSG00000086069_Gm13708	2.55057	0.832124	1.02517	0.626638	0.428591	0.595175
ENSMUSG00000056486_Chn1	3.17964	1.02134	1.29971	0.351941	0.553016	0.707287
ENSMUSG00000027104_Atf2	1099.67	0.052707	0.116717	0.203435	0.651962	0.786727
ENSMUSG00000018770_Atp5g3	5517.44	0.232134	0.0570276	16.5339	4.77872716196321e-05	0.00033865
ENSMUSG00000009207_Lnpk	538.117	-0.244447	0.112289	4.71522	0.0298967	0.0804056
ENSMUSG00000075279_Mrpl23-ps1	15.604	0.765303	0.305772	6.24324	0.0124668	0.0395164
ENSMUSG00000050368_Hoxd10	1.5277	-2.72444	2.84939	0.897728	0.343392	NA
ENSMUSG00000043342_Hoxd9	2.74777	-3.34079	1.45748	2.39381	0.121817	0.241151
ENSMUSG00000027102_Hoxd8	3.35168	-0.423325	1.3876	0.0864527	0.768736	0.870545
ENSMUSG00000079277_Hoxd3	1.5013	-1.41429	1.44337	1.08704	0.297127	NA
ENSMUSG00000075277_Haglr	2.35147	-2.54785	2.04179	1.42224	0.233035	0.388923
ENSMUSG00000042448_Hoxd1	10.9635	0.946245	0.548282	3.16354	0.0752998	0.166728
ENSMUSG00000027099_Mtx2	942.423	0.381093	0.110526	11.736	0.000613014	0.00310104
ENSMUSG00000100303_2600014E21Rik	1.24787	1.44303	3.00851	0.229562	0.631848	NA
ENSMUSG00000081406_Rps6-ps4	55.6799	0.274983	0.228556	1.44086	0.23	0.385246
ENSMUSG00000059005_Hnrnpa3	1754.2	0.198608	0.0790643	6.2873	0.0121606	0.0387557
ENSMUSG00000015839_Nfe2l2	14406	-0.0376003	0.19089	0.0369026	0.847664	0.920976
ENSMUSG00000089015_Gm24996	5.18079	-0.424628	0.593799	0.499467	0.479735	0.64334
ENSMUSG00000087222_E030042O20Rik	8.62535	-0.618475	1.16126	0.178512	0.672655	0.802179
ENSMUSG00000086813_Gm13657	4.34319	-1.42434	0.69392	4.02463	0.0448404	0.111257
ENSMUSG00000042410_Agps	2001.02	0.283905	0.0782839	13.1115	0.000293483	0.00163254
ENSMUSG00000075273_Ttc30b	19.4069	-0.534582	0.47389	1.23456	0.266523	0.426985
ENSMUSG00000075271_Ttc30a1	17.0093	-2.41453	0.776527	6.84151	0.00890637	0.0299072
ENSMUSG00000075270_Pde11a	37.536	-0.759266	0.343907	4.91711	0.0265919	0.0732538
ENSMUSG00000042369_Rbm45	51.0895	1.35073	0.275807	23.5561	1.21325008782345e-06	1.29725567141196e-05
ENSMUSG00000042359_Osbpl6	22.3346	-0.482218	0.575489	0.639046	0.424056	0.59065
ENSMUSG00000002731_Prkra	694.012	0.508164	0.152392	10.8252	0.00100125	0.00474436
ENSMUSG00000075267_Dfnb59	26.4321	0.0559129	0.452863	0.015032	0.90242	0.955142
ENSMUSG00000002732_Fkbp7	72.9752	0.0161755	0.194887	0.00687561	0.933916	0.973142
ENSMUSG00000002733_Plekha3	1348.16	0.0700745	0.067746	1.06766	0.301476	0.465922
ENSMUSG00000051747_Ttn	307.719	-1.61892	0.816432	2.96613	0.0850251	0.18352
ENSMUSG00000044033_Ccdc141	1.32923	-1.84303	1.53246	1.70944	0.191058	NA
ENSMUSG00000042272_Sestd1	945.958	0.101442	0.12355	0.664056	0.415132	0.581905
ENSMUSG00000081611_Gm13651	0.808545	-0.614335	1.33957	0.205116	0.650622	NA
ENSMUSG00000027014_Cwc22	548.941	-0.255116	0.0811847	9.85643	0.00169239	0.00741223
ENSMUSG00000027011_Ube2e3	1801.62	0.206714	0.0738514	7.82046	0.0051658	0.0190007
ENSMUSG00000102286_Gm37004	1.00408	0.438986	2.13301	0.0525703	0.81865	NA
ENSMUSG00000027009_Itga4	3334.32	-0.382157	0.0601725	40.1936	2.29999323532053e-10	5.44476191333147e-09
ENSMUSG00000075256_Cerkl	39.8864	-0.24895	0.304265	0.664177	0.415089	0.581893
ENSMUSG00000081284_Gm13673	1.5478	-3.44064	1.64205	4.76918	0.0289737	NA
ENSMUSG00000027007_Ssfa2	3943.22	0.107948	0.189874	0.30831	0.578719	0.728639
ENSMUSG00000059173_Pde1a	4.83666	4.88616	1.10106	18.5568	1.64911916779634e-05	0.000131548
ENSMUSG00000027006_Dnajc10	2445.42	0.0128911	0.118902	0.0115815	0.914299	0.961638
ENSMUSG00000027004_Frzb	2.76854	1.32317	2.29492	-0.142296	1	1
ENSMUSG00000027002_Nckap1	178.881	-1.13305	0.26961	16.6362	4.52778789664828e-05	0.000322818
ENSMUSG00000027001_Dusp19	59.2696	0.21119	0.274815	0.556034	0.455862	0.621315
ENSMUSG00000026999_Nup35	99.6973	-0.434944	0.216958	3.89877	0.0483214	0.118143
ENSMUSG00000064193_Gm4735	3.04536	0.686964	0.649116	1.10229	0.293764	0.457541
ENSMUSG00000081400_Gm13680	5.31023	0.370103	0.569933	0.412789	0.520557	0.679336
ENSMUSG00000027091_Zc3h15	1865.05	-0.408375	0.106034	14.6152	0.000131847	0.000811711
ENSMUSG00000027087_Itgav	1396.25	-0.652535	0.168702	14.3768	0.000149634	0.000904735
ENSMUSG00000085335_Gm13684	14.3385	-1.27245	0.389398	10.6503	0.00110051	0.00514675
ENSMUSG00000048388_Fam171b	15.1387	-2.61774	0.969708	4.73248	0.0295982	0.0797858
ENSMUSG00000059588_Calcrl	490.297	-0.367792	0.21225	2.88786	0.0892495	0.190465
ENSMUSG00000027082_Tfpi	69.6826	-1.25405	0.273016	20.2128	6.92875669418766e-06	6.07224222690916e-05
ENSMUSG00000087362_Gm13710	76.0053	2.30899	0.491623	16.3803	5.18200623100746e-05	0.000364439
ENSMUSG00000034101_Ctnnd1	52.6595	0.38386	0.334445	1.20461	0.272402	0.433797
ENSMUSG00000076437_Selenoh	736.44	0.131768	0.104167	1.59318	0.206872	0.35768
ENSMUSG00000050043_Tmx2	521.523	0.156939	0.171588	0.823813	0.364068	0.530889
ENSMUSG00000027080_Med19	335.777	0.0263759	0.0933441	0.0797513	0.777635	0.875838
ENSMUSG00000034075_Zdhhc5	2054.89	-0.155893	0.083035	3.50212	0.0612905	0.142221
ENSMUSG00000027079_Clp1	1369.1	-0.5608	0.0965102	33.3855	7.55861251718664e-09	1.33750941212068e-07
ENSMUSG00000034059_Ypel4	8.65406	-1.94051	0.960576	3.79219	0.0514923	0.124238
ENSMUSG00000023224_Serping1	141.377	1.3532	0.368953	11.5361	0.000682572	0.00340589
ENSMUSG00000027078_Ube2l6	3558.25	0.775466	0.176484	18.4107	1.78059237406698e-05	0.000141076
ENSMUSG00000027076_Timm10	224.028	-0.0612516	0.128147	0.227823	0.633143	0.772285
ENSMUSG00000027075_Slc43a1	7.71801	0.413457	1.11647	0.129979	0.718454	0.835253
ENSMUSG00000050896_Rtn4rl2	5.13966	2.70413	1.27681	2.29464	0.129821	0.253235
ENSMUSG00000027074_Slc43a3	198.897	0.208001	0.165828	1.55821	0.211928	0.363739
ENSMUSG00000027073_Prg2	179.116	0.851681	0.844628	0.763035	0.38238	0.549036
ENSMUSG00000027072_Prg3	46.0808	-0.191565	0.292071	0.415745	0.519068	0.677996
ENSMUSG00000027071_P2rx3	1.31557	-1.00642	1.72342	0.145909	0.702476	NA
ENSMUSG00000027067_Ssrp1	4389.43	-0.185844	0.0451303	16.9252	3.88816734106502e-05	0.000282133
ENSMUSG00000033955_Tnks1bp1	126.188	-0.146328	0.184347	0.618883	0.431463	0.598171
ENSMUSG00000044338_Aplnr	91.5547	1.84185	1.32739	1.22665	0.268059	0.428821
ENSMUSG00000082534_Gm13712	1.1028	-0.801821	1.61838	0.367038	0.544624	NA
ENSMUSG00000085135_Gm13713	7.0229	1.45051	0.586182	6.00441	0.0142702	0.0442833
ENSMUSG00000045392_Olfr1033	2.49098	-1.33532	1.05344	1.53696	0.215071	0.367434
ENSMUSG00000082028_Gm1826	0.937896	-1.85362	1.26475	2.4044	0.120994	NA
ENSMUSG00000082908_Gm13736	2.72449	0.369549	0.624688	0.344916	0.557005	0.710094
ENSMUSG00000075072_Olfr48	2.70986	-3.13268	2.50779	1.26247	0.261185	0.421282
ENSMUSG00000049149_Olfr1258	1.39114	-1.0971	1.51725	0.582486	0.44534	NA
ENSMUSG00000068806_Olfr1259	0.802802	-2.07944	3.02637	0.487917	0.484858	NA
ENSMUSG00000025314_Ptprj	1097.74	0.473348	0.116712	16.2165	5.64996498691179e-05	0.000392175
ENSMUSG00000085471_4933423P22Rik	18.473	-1.23838	0.415235	8.70315	0.00317661	0.0125728
ENSMUSG00000051329_Nup160	1079.09	-0.25004	0.111604	4.95534	0.0260102	0.0719668
ENSMUSG00000008200_Fnbp4	1661.89	-0.225541	0.119033	3.58524	0.0582952	0.136514
ENSMUSG00000040812_Agbl2	19.6667	-0.253126	1.20934	0.0149698	0.902621	0.955189
ENSMUSG00000027282_Mtch2	2039.87	0.309393	0.0761698	16.4544	4.98348946765147e-05	0.000352026
ENSMUSG00000040794_C1qtnf4	18.0924	-1.25872	0.318768	15.462	8.41791145868972e-05	0.000549602
ENSMUSG00000005510_Ndufs3	1024.8	0.142507	0.0497888	8.18914	0.00421419	0.0159852
ENSMUSG00000005505_Kbtbd4	126.515	-0.665098	0.174673	14.2077	0.000163696	0.000974038
ENSMUSG00000063235_Ptpmt1	395.022	0.222422	0.151121	2.13854	0.143638	0.273514
ENSMUSG00000005506_Celf1	1927.98	-0.23684	0.0866166	7.44744	0.00635269	0.0225915
ENSMUSG00000002104_Rapsn	43.2007	-0.0592592	0.346022	0.0276446	0.867947	0.934177
ENSMUSG00000086495_Gm13778	1.03114	-0.635197	2.19803	0.058458	0.80895	NA
[truncated: 18,352 more rows]

## Sheet: 4
Sample	HK	BCell	Mac	TCell
GSM395738	10.5151	4.39682	11.8336	7.57936
GSM395739	10.4357	3.21634	12.1766	8.78339
GSM395740	10.8107	4.2439	11.8117	8.14772
GSM395741	10.528	3.04491	9.84527	13.0635
GSM395742	10.5475	2.48152	9.91925	13.5228
GSM395743	10.7129	1.17192	9.32167	13.1636
RNA191014FP_ND1_minus_S5_L003_R1_001	11.585	0.177264	12.7239	12.1124
RNA191014FP_ND1_plus_S6_L003_R1_001	11.6234	1.6829	11.108	4.44037
RNA191014FP_TD_minus_S1_L003_R1_001	11.6242	1.18826	14.2836	8.59829
RNA191014FP_TD1_plus_S2_L003_R1_001	12.026	1.09299	11.8406	0.651743
RNA191014FP_ND1_minus_S5_L004_R1_001	11.596	0.300044	12.7621	12.1104
RNA191014FP_ND1_plus_S6_L004_R1_001	11.6165	1.6897	11.0012	4.4758
RNA191014FP_TD_minus_S1_L004_R1_001	11.6201	1.30849	14.2942	8.56478
RNA191014FP_TD1_plus_S2_L004_R1_001	12.0641	0.894958	11.8611	0.379878
RNA191014FP_ND2_minus_S7_L003_R1_001	11.1687	-0.23933	12.1603	12.1948
RNA191014FP_ND2_plus_S8_L003_R1_001	11.8926	1.77464	11.2359	5.03311
RNA191014FP_TD2_minus_S3_L003_R1_001	11.7863	1.3787	14.0821	9.08914
RNA191014FP_TD2_plus_S4_L003_R1_001	12.5224	1.15027	11.7118	-0.313603
RNA191014FP_ND2_minus_S7_L004_R1_001	11.1498	-0.224879	12.1607	12.1787
RNA191014FP_ND2_plus_S8_L004_R1_001	11.8915	1.85421	11.2901	5.21529
RNA191014FP_TD2_minus_S3_L004_R1_001	11.8005	1.2039	14.1177	9.22466
RNA191014FP_TD2_plus_S4_L004_R1_001	12.5044	1.25945	11.7048	-0.175888
